# Supplementary material for: Salivary miRNA and microbial profiles reflect different responses to psychosocial stress
Source: bioRxiv preprint, doi:10.64898/2026.03.20.713173, version 2 (2026-07-29)
Supplement: Table S1 [file 713173_file08.xlsx]

## Sheet: A_Alignment_statistics
Supplementary Table 1. A) Alignment statistics from small RNA-seq data for all samples analyzed in this study ; B) Differential expression analysis of the small RNA-Seq data; C) List of the validated genes targeted by miRNAs resulting differentially expressed in this study; D) miRNA-target gene interactions supported by literature; E) Pathway enrichment analyses of differentially expressed miRNAs…
								FastqQC on raw data	Surviving reads		Mapped reads
ID	Original_ID	Qualification	Stress_class	Tofilter	Pool	Age	BMI	Total Sequences	N°	%	N°	%	Detected miRNAs
5	5	Assistant	High	No	P2	39	24.8	11683997	11198148	0.958418	13651	0.00121904	241
7	7	Selected agent	High	No	P1	30	25.3	6178766	4948327	0.80086	18021	0.00364184	218
8	8	Assistant	High	No	P2	31	31.1	14438973	13562025	0.939265	44611	0.00328941	274
11	11	Assistant Chief	High	No	P2	38	22.4	6446297	5359281	0.831374	12044	0.00224732	219
15	15	Assistant	High	No	P2	32	30.4	11285933	9803709	0.868666	27241	0.00277864	250
16	16	Agent	High	No	P2	29	24	13066421	11945400	0.914206	23534	0.00197013	213
18	18	Assistant	High	No	P2	33	24.3	9133350	8526872	0.933597	13340	0.00156447	236
19	19	Assistant Chief	Intermediate	No	P1	35	24.1	5320316	4764983	0.89562	14054	0.00294943	203
25	25	Deputy Superintendent	Intermediate	No	P2	42	26.5	15469536	14093499	0.911049	23469	0.00166524	259
27	27	Selected agent	Intermediate	No	P2	28	25.2	14078202	12836921	0.91183	44674	0.00348012	312
32	32	Selected agent	Intermediate	No	P1	31	24.3	7980164	6758117	0.846864	28282	0.00418489	226
34	34	Chief Inspector	Low	No	P1	45	26	6914224	6241854	0.902756	21379	0.0034251	229
38	38	Selected agent	High	No	P2	27	29.8	9286471	8395374	0.904044	22602	0.0026922	263
41	41	Selected agent	Low	No	P1	39	24.9	7617546	7015334	0.920944	23950	0.00341395	235
42	42	Assistant Chief	Low	No	P2	37	28.5	11452661	9872453	0.862023	20738	0.00210059	261
46	46	Selected agent	Intermediate	No	P1	29	24.4	8342241	7239584	0.867822	34212	0.00472569	242
50	50	Assistant Chief	Intermediate	No	P2	35	27.8	10880255	9462336	0.86968	22013	0.00232638	307
51	51	Selected agent	Intermediate	No	P2	30	23.7	6377573	5488268	0.860557	15856	0.00288907	295
52	52	Deputy Superintendent	Intermediate	No	P2	45	30.4	12200907	10167710	0.833357	35054	0.00344758	279
57	57	Chief IT Technical Collaborator	Low	No	P1	43	25.3	7667454	6563638	0.856039	27134	0.00413399	257
58	58	Selected agent	Intermediate	No	P2	31	25.1	10234118	9063479	0.885614	20675	0.00228113	219
59	59	Selected agent	Intermediate	No	P1	41	26.5	19763275	18970570	0.95989	63529	0.00334882	337
60	60	Selected agent	Low	No	P2	32	29.4	9823980	9220272	0.938548	14317	0.00155277	245
62	62	Assistant Chief	Intermediate	No	P1	39	34.7	9052637	8349556	0.922334	22926	0.00274577	192
63	63	Assistant Chief	Intermediate	No	P1	38	29.3	8354647	7751699	0.927831	66356	0.00856019	332
66	66	Selected agent	Intermediate	No	P2	37	25.9	13727705	12330195	0.898198	34153	0.00276987	266
73	73	Agent	High	No	P2	25	24.4	14439684	13479500	0.933504	25478	0.00189013	277
75	75	Assistant Chief	High	No	P1	43	23.5	5369187	4260616	0.793531	22501	0.00528116	234
79	79bis	Selected agent	Intermediate	No	P1	27	25.7	8277492	7388852	0.892644	35361	0.00478572	234
82	82	Superintendent	High	No	P2	37	23.6	9596600	8655928	0.901979	18899	0.00218336	261
84	84bis	Assistant Chief	Low	No	P1	44	24.6	11737014	9371067	0.79842	26650	0.00284386	254
85	85	Selected agent	High	No	P2	27	26.9	12089840	11189140	0.925499	43252	0.00386553	282
90	90	Selected agent	Intermediate	No	P2	39	31.4	7612353	6278786	0.824815	16308	0.00259732	277
91	91	Selected agent	Intermediate	No	P1	32	25.1	6921069	6269799	0.9059	23788	0.00379406	231
92	92	Assistant	Low	No	P2	33	26	11594126	10758201	0.927901	21814	0.00202766	190
93	93	Assistant Chief	Intermediate	No	P2	43	27.4	13718503	11435984	0.833617	32779	0.0028663	244
97	97	IT Technical Collaborator	Intermediate	No	P2	44	31.7	10178939	9558316	0.939029	14367	0.00150309	236
103	103	Assistant	Intermediate	No	P2	37	25	11724343	11238703	0.958578	14459	0.00128654	223
110	110	Agent	Low	No	P2	31	23.5	13068992	11967605	0.915725	32904	0.00274942	272
111	111	Motorization Technical Auditor	Intermediate	No	P2	40	29	14390522	13550390	0.941619	35380	0.00261099	310
112	112	Assistant Chief	Intermediate	No	P1	40	32.4	6870260	6249567	0.909655	22518	0.00360313	259
114	114	Agent	Low	No	P2	29	32.5	2510525	2020359	0.804756	6410	0.0031727	NA
116	116	Assistant	Low	No	P1	35	25.6	7361907	6850788	0.930572	15179	0.00221566	223
118	118	Selected agent	Low	No	P2	40	22.7	11156008	10435200	0.935388	19851	0.00190231	246
123	123bis	Chief Inspector	Intermediate	No	P1	44	27.1	8418931	6934558	0.823686	28438	0.00410091	286
125	125	Deputy Superintendent	Low	No	P1	32	22.7	7570781	6562495	0.866819	25450	0.0038781	207
126	126	Assistant	Intermediate	No	P2	32	24.7	15854041	14254998	0.89914	38735	0.00271729	244
129	129	Assistant Chief	Low	No	P1	35	36.8	21002991	19956840	0.95019	54858	0.00274883	241
130	130	Assistant Chief	Intermediate	No	P1	35	36.8	11919153	10000371	0.839017	38966	0.00389646	222
132	132	Assistant Chief	Low	No	P2	44	38	10150785	9179992	0.904363	19874	0.00216493	237
133	133	Selected agent	Intermediate	No	P1	28	25.3	8723058	7956027	0.912069	29195	0.00366955	224
135	135	Selected agent	Intermediate	No	P2	33	25.9	12267122	10537865	0.859033	30611	0.00290486	201
136	136	Assistant	Low	No	P1	31	23.8	7322261	6619469	0.90402	27536	0.00415985	234
139	139	Selected agent	Low	No	P1	30	23.4	8381187	7333773	0.875028	42938	0.00585483	283
140	140	Assistant	Low	No	P2	31	23.5	23829324	23186612	0.973029	67492	0.00291082	324
142	142	Selected agent	Low	No	P2	36	24.2	19626797	17750412	0.904397	39881	0.00224676	240
143	143	Assistant Chief	High	No	P1	41	26.1	7254506	6369539	0.878011	23843	0.00374329	212
145	145	Assistant	Intermediate	No	P2	37	23.5	14621098	13840495	0.946611	37255	0.00269174	355
147	147	Assistant	Low	No	P2	33	34	10452784	8548188	0.817791	27945	0.00326911	245
150	150	Selected agent	Low	No	P1	38	23.4	9073609	8187043	0.902292	45930	0.00561008	290
153	153	Assistant Chief	Intermediate	No	P3	36	23.8	6808518	5841535	0.857975	44205	0.00756736	232
154	154	Assistant Chief	Intermediate	No	P1	46	21.4	7240488	6125756	0.846042	17752	0.00289793	226
155	155	Selected agent	High	No	P3	35	28.7	5121143	4320850	0.843728	68493	0.0158517	262
156	156	Selected agent	High	No	P3	28	26.3	9811050	8943076	0.911531	67643	0.00756373	237
163	163	Superintendent	Low	No	P3	39	24.1	7688093	6739537	0.87662	50799	0.00753746	283
166	166	Selected agent	Intermediate	No	P1	41	27	8596615	6894212	0.801968	30092	0.00436482	244
169	169	Assistant	Intermediate	No	P1	36	22.5	9605938	8792749	0.915345	27699	0.00315021	215
170	170	Assistant	Low	No	P1	36	22.2	10189882	9045124	0.887657	41092	0.004543	214
173	173	Chief IT Technical Collaborator	Low	No	P1	41	27.5	14982410	13989779	0.933747	50708	0.00362465	282
174	174	Assistant Chief	Intermediate	No	P1	44	26.3	8362542	7122824	0.851753	30369	0.00426362	233
178	178	Superintendent	Intermediate	No	P1	39	23	11860901	10938765	0.922254	39506	0.00361156	549
180	180	Assistant	Intermediate	No	P3	36	23.4	5971830	5006789	0.838401	79812	0.0159408	293
184	184	Assistant Chief	High	No	P3	43	24.8	9726	8218	0.844952	69	0.0083962	NA
191	191	Chief IT Technical Collaborator	Intermediate	No	P1	43	24.7	6354245	5707398	0.898202	20188	0.00353716	211
192	192	Chief Inspector	High	No	P3	40	35.1	11576442	10591458	0.914915	70504	0.00665669	227
193	193	Assistant Chief	Intermediate	No	P3	40	22.5	23209981	22025129	0.948951	343464	0.0155942	355
198	198	Selected agent	Intermediate	No	P3	30	23.9	19089368	17389462	0.91095	132372	0.0076122	210
199	199	Assistant	Low	No	P3	41	26.6	16236967	13206849	0.813382	81575	0.00617672	261
200	200	Assistant	High	No	P1	35	24.4	12207789	10697729	0.876304	44067	0.00411929	228
201	201	Assistant Chief	Low	No	P3	45	27	6336370	5881835	0.928266	40525	0.00688986	221
209	209	Selected agent	Intermediate	No	P3	33	35.6	6093325	5704786	0.936235	77635	0.0136087	304
211	211	Selected agent	High	No	P1	29	25.5	9849288	8814215	0.894909	30802	0.00349458	230
222	222	Motorization Technical Auditor	Low	No	P3	46	23.4	6414020	5347137	0.833664	56460	0.0105589	255
224	224	Assistant Chief	Intermediate	No	P3	40	27.2	6315214	5244400	0.830439	37746	0.00719739	258
225	225	Motorization Technical Auditor	Low	No	P3	34	29.1	6456317	5835391	0.903827	67632	0.01159	256
226	226	Assistant	High	No	P1	34	23.5	8966418	7974119	0.889332	23713	0.00297375	204
227	227	Assistant	Intermediate	No	P3	36	28.4	4264755	3876906	0.909057	24498	0.00631896	252
231	231	Assistant	Intermediate	No	P3	46	27.8	7558361	6928306	0.916641	46505	0.00671232	217
233	233	Selected agent	High	No	P3	35	25.1	6597999	6075927	0.920874	43059	0.00708682	236
236	236	Selected agent	Low	No	P3	34	24.6	6689011	6058984	0.905812	48091	0.00793714	186
242	242	Chief IT Technical Collaborator	Intermediate	No	P1	40	25.6	11547390	10567686	0.915158	26345	0.00249298	200
246	246	Assistant	Low	No	P3	32	25.3	5677600	4495896	0.791866	33076	0.00735693	316
251	251	Assistant Chief	Intermediate	No	P1	37	24.9	8211459	7460038	0.908491	19117	0.00256259	243
252	252	Chief Inspector	Intermediate	No	P1	44	32.8	9138171	7412343	0.811141	30197	0.00407388	280
255	255	Assistant Chief	High	No	P3	38	29.8	7636817	4902080	0.641901	44959	0.00917141	205
256	256	Selected agent	Intermediate	No	P3	40	23.4	7774908	6731303	0.865773	55491	0.00824372	238
258	258	Selected agent	Intermediate	No	P3	36	35.5	5879719	5253600	0.893512	38790	0.00738351	197
260	260	Selected agent	High	No	P3	39	28.4	5651472	5156481	0.912414	43690	0.00847283	223
262	262	Chief IT Technical Collaborator	Intermediate	No	P3	37	27.5	6420627	5973182	0.930311	80800	0.0135271	484
263	263	Assistant Chief	High	No	P3	40	30	11428081	10444301	0.913916	129257	0.0123758	294
264	264	Assistant Chief	Low	No	P3	35	23.8	4450559	4278381	0.961313	227735	0.0532292	395
265	265	Selected agent	Intermediate	No	P3	30	22	8014320	6936623	0.865529	52490	0.00756708	258
270	270	Selected agent	High	No	P3	29	28.7	9589019	7524406	0.78469	48303	0.00641951	235
276	276	Selected agent	Intermediate	No	P3	34	24.6	7137833	6427127	0.900431	50130	0.00779975	209
283	283	Healthcare Technical Auditor	Intermediate	No	P3	41	26.6	7017611	6217946	0.886049	44650	0.00718083	206
290	290	Assistant	High	No	P3	35	26.9	7115737	6795105	0.95494	52375	0.00770775	202
291	291	IT Technical Collaborator	Intermediate	No	P3	37	26.6	8109595	7831809	0.965746	38355	0.00489734	193
298	298	Assistant Chief	Low	No	P3	36	24.5	7063116	6733376	0.953315	48179	0.00715525	301
301	301	Selected agent	Intermediate	No	P3	41	26.3	21750326	20875181	0.959764	239775	0.0114861	339
303	303	Assistant	High	No	P3	39	26.9	9182127	7898185	0.860169	67838	0.00858906	232
306	306	Selected agent	Intermediate	No	P3	35	25.7	8258976	7222450	0.874497	48514	0.00671711	229
312	312	Agent	Low	No	P3	26	26.1	7066876	6733509	0.952827	37473	0.00556515	198
314	314	Assistant	High	No	P3	33	23	6331378	5585332	0.882167	60689	0.0108658	271
315	315	Chief IT Technical Collaborator	Intermediate	No	P3	36	29.7	9517554	8429090	0.885636	48772	0.00578615	217
320	320	Assistant Chief	Intermediate	No	P3	42	24.5	9811819	9210542	0.938719	69223	0.00751563	273

## Sheet: B_DE_analysis
	Filters		Median			Average			log2FC			p-value			adjusted p-value
ID	Median > 15	adj. p < 0.05	Low	Int	High	Low	Int	High	Int / Low	High / Low	High / Int	Int / Low	High / Low	High / Int	Int / Low	High / Low	High / Int
hsa-let-7a-5p	Yes	No	57.4179	64.7449	43.6353	147.888	133.632	92.8468	-0.0454792	-0.88622	-0.840741	0.891842	0.0259928	0.0198475	0.976637	0.353563	0.210177
hsa-let-7b-5p	Yes	No	61.9261	75.0082	42.6814	117.591	170.392	96.7782	0.556101	-0.475521	-1.03162	0.106579	0.246184	0.00550038	0.558701	0.744276	0.0997658
hsa-let-7c-5p	Yes	No	14.9805	17.317	14.8349	23.595	34.6893	20.2044	0.610982	-0.40024	-1.01122	0.0481715	0.278888	0.00250027	0.423232	0.769846	0.0585641
hsa-miR-21-5p	Yes	Yes	81.7101	69.5891	45.1893	751.858	373.266	108.36	-0.71906	-3.07586	-2.3568	0.150786	2.41169e-07	1.27635e-05	0.629181	0.000186218	0.00138803
hsa-miR-10400-5p	Yes	Yes	42.7013	43.3314	35.0701	52.4855	117.492	348.89	1.04213	2.50959	1.46746	0.0113922	2.86489e-07	0.000909536	0.200731	0.000186218	0.0301037
hsa-let-7i-5p	Yes	No	111.722	134.252	61.6509	404.599	331.839	209.71	-0.0999194	-1.1587	-1.05878	0.805324	0.0162501	0.0154196	0.958822	0.288595	0.184128
hsa-miR-10392-5p	Yes	No	66.9803	61.8058	60.6328	81.3528	96.6693	92.094	0.181759	0.260678	0.0789191	0.461014	0.373853	0.766298	0.865551	0.823186	0.95448
hsa-miR-142-3p	Yes	Yes	15.3911	12.9325	12.2243	162.405	47.6662	24.9794	-1.40386	-2.89858	-1.49472	0.00330069	3.74973e-07	0.00392152	0.0988706	0.000203111	0.0806827
hsa-miR-106b-3p	Yes	No	19.921	19.7066	12.0554	34.3884	26.1683	27.0523	-0.373675	-0.432066	-0.0583906	0.161479	0.173655	0.839722	0.642311	0.672216	0.977743
hsa-miR-106b-5p	Yes	No	203.613	209.641	196.81	294.739	305.047	278.7	-0.0602288	0.00207962	0.0623084	0.82365	0.994836	0.830601	0.963178	0.999449	0.974172
hsa-miR-1184	Yes	No	34.1251	24.0977	37.841	44.871	36.2008	51.8426	-0.360027	0.279939	0.639966	0.149045	0.343982	0.0171709	0.629181	0.806301	0.194369
hsa-miR-1184-5p:Novel	Yes	No	106.688	78.1341	75.1637	129.609	120.988	99.2534	-0.0957248	-0.387817	-0.292093	0.699171	0.18828	0.274487	0.930963	0.685997	0.70024
hsa-miR-12114	Yes	No	18.2201	22.547	25.0608	27.0398	31.1578	24.4686	0.202995	-0.206303	-0.409298	0.369376	0.444557	0.0939355	0.828678	0.87835	0.472783
hsa-miR-12123	Yes	No	55.8333	53.7417	66.7868	117.656	123.775	114.263	-0.00751346	-0.0197394	-0.012226	0.982003	0.960245	0.972829	0.996367	0.997645	0.997578
hsa-miR-12131	Yes	No	15.5589	13.7236	19.449	30.7089	19.0349	26.0686	-0.734515	-0.19513	0.539386	0.00692011	0.545148	0.0665838	0.160862	0.9204	0.395219
hsa-miR-12136	Yes	No	37.2934	36.8918	36.3582	58.1043	61.5314	58.3551	0.131017	-0.172695	-0.303712	0.676024	0.64322	0.368745	0.929203	0.956297	0.773573
hsa-miR-12136-3p:Novel	Yes	No	28.8234	27.0033	36.3797	31.5585	30.9199	33.0535	-0.0374813	0.0714998	0.108981	0.82445	0.721461	0.548848	0.963178	0.967889	0.880141
hsa-miR-1229-5p	Yes	No	39.6498	28.7753	33.0724	42.9881	53.6684	41.8475	0.216268	0.0162068	-0.200061	0.424825	0.95995	0.493687	0.848314	0.997645	0.850751
hsa-miR-1246	Yes	No	105.018	125.433	221.257	461.463	757.329	969.601	0.715631	1.06927	0.353637	0.141237	0.0644017	0.499761	0.624664	0.505032	0.853502
hsa-miR-1253	Yes	No	17.7444	17.6674	18.3918	18.5389	19.4227	19.9669	0.0603397	0.114034	0.0536943	0.678194	0.508058	0.729943	0.929203	0.911072	0.940705
hsa-miR-1262	Yes	No	15.1834	12.966	12.4947	19.0176	15.7443	14.3688	-0.272286	-0.388914	-0.116628	0.151416	0.0869821	0.574107	0.629181	0.539358	0.88486
hsa-miR-1266-5p	Yes	No	17.6308	19.8752	23.7119	22.0336	24.0229	26.7029	0.139441	0.248203	0.108762	0.570374	0.394254	0.679819	0.900429	0.843851	0.925021
hsa-miR-1267-3p:Novel	Yes	No	15.2346	19.783	20.2863	21.0997	21.557	22.5933	0.0511093	0.0805873	0.0294781	0.822087	0.765272	0.904002	0.963121	0.976113	0.993228
hsa-miR-1268a	Yes	No	11.4332	14.3119	17.0781	13.4716	15.295	17.3231	0.191075	0.337912	0.146838	0.290407	0.112534	0.442761	0.770133	0.586842	0.821577
hsa-miR-1268a-3p:Novel	Yes	No	13.9669	15.0718	16.139	14.852	16.0801	16.892	0.132794	0.149345	0.0165509	0.492737	0.515112	0.936291	0.877802	0.914817	0.996303
hsa-miR-1272-3p:Novel	Yes	No	86.5289	117.847	90.7462	158.7	193.368	174.863	0.188739	0.19567	0.0069311	0.531532	0.585335	0.982985	0.89414	0.939678	0.99842
hsa-miR-1273c-3p:Novel	Yes	No	21.2534	21.5278	18.3365	28.9999	26.1939	34.4327	-0.0232185	-0.0707437	-0.0475253	0.921587	0.800313	0.851335	0.982695	0.977782	0.981114
hsa-miR-1273h-5p	Yes	No	19.3498	26.7959	24.2086	24.5144	26.7464	28.8656	0.143859	0.224571	0.0807122	0.472865	0.344531	0.707026	0.87286	0.806301	0.933113
hsa-miR-128-3p	Yes	No	33.9671	28.7009	24.264	57.08	40.5199	37.093	-0.436663	-0.756954	-0.32029	0.116294	0.0223225	0.287321	0.573676	0.330592	0.711283
hsa-miR-1285-2:Novel	Yes	No	14.9263	18.3352	17.8019	16.9015	18.743	17.7471	0.162778	0.0446891	-0.118089	0.320608	0.818693	0.501725	0.796278	0.977782	0.854944
hsa-miR-1285-3p	Yes	No	36.6374	40.3722	39.4539	56.1348	46.3011	63.8376	-0.265145	0.286392	0.551537	0.20508	0.248305	0.0142822	0.692008	0.746393	0.173536
hsa-miR-1285-5p	Yes	No	111.329	133.279	150.605	141.669	137.782	148.099	-0.0299855	0.0474133	0.0773988	0.869473	0.826923	0.693753	0.976253	0.977782	0.930077
hsa-miR-129-5p	Yes	No	97.8252	77.5949	68.5332	140.627	129.693	158.363	-0.342162	0.098251	0.440413	0.273166	0.7912	0.190585	0.754787	0.97765	0.623801
hsa-miR-27a-3p	Yes	Yes	62.5626	40.3722	24.4486	316.374	158.721	68.3475	-0.816208	-2.42351	-1.6073	0.0662349	4.64935e-06	0.000811887	0.483561	0.00116234	0.0290847
hsa-miR-1294-3p:Novel	Yes	No	21.5304	24.7212	26.6313	29.0107	31.5365	37.9557	0.0730927	0.448486	0.375393	0.757809	0.110581	0.139973	0.946203	0.58437	0.55138
hsa-miR-1302	Yes	No	87.861	78.8767	79.8801	110.254	93.3158	96.0945	-0.270494	-0.165195	0.105299	0.1156	0.419082	0.570429	0.573676	0.862851	0.883601
hsa-miR-1307-3p	Yes	No	15.3408	17.3908	10.8914	34.4195	36.1288	33.1112	0.159481	-0.225348	-0.384829	0.637223	0.575372	0.29118	0.924781	0.937323	0.71244
hsa-miR-137-3p	Yes	No	120.33	148.421	147.952	217.517	232.468	225.137	-0.00599494	0.120481	0.126476	0.983875	0.7326	0.692318	0.996572	0.970182	0.929995
hsa-miR-140-3p	Yes	No	29.1292	30.0376	14.5251	140.366	70.8801	73.8041	-0.764197	-1.36502	-0.600823	0.0659336	0.00577226	0.180531	0.483561	0.148916	0.614719
hsa-miR-143-3p	Yes	Yes	186.59	198.992	152.283	479.815	238.542	184.423	-1.01008	-1.37724	-0.367157	0.000107781	9.08643e-06	0.192209	0.013529	0.0018759	0.623966
hsa-miR-30e-5p	Yes	Yes	15.7025	13.1415	7.90396	125.938	40.9996	25.4562	-1.46738	-2.40049	-0.933106	0.00143824	1.23709e-05	0.061463	0.0601779	0.00223364	0.377136
hsa-miR-26a-5p	Yes	Yes	95.2735	141.298	64.5562	1322.47	416.895	272.768	-1.44788	-2.47378	-1.0259	0.00256642	1.4726e-05	0.0474859	0.0845637	0.00250422	0.332792
hsa-miR-146b-5p	Yes	No	29.2219	37.6935	33.9742	64.8875	61.337	40.4441	0.0725061	-0.777733	-0.850239	0.798075	0.0214144	0.00556291	0.956828	0.327039	0.0999587
hsa-miR-26b-5p	Yes	Yes	22.4038	23.6018	14.5251	236.349	102.85	56.6573	-0.849977	-2.36527	-1.51529	0.0830931	5.13568e-05	0.00424152	0.503619	0.0064196	0.0849698
hsa-miR-152-3p	Yes	No	23.0305	27.2938	26.6575	28.7127	39.5884	33.7415	0.443025	0.280543	-0.162482	0.0937722	0.372271	0.567451	0.535746	0.822797	0.883601
hsa-miR-7-5p	Yes	Yes	55.7847	53.9545	48.4986	140.348	75.1531	63.2995	-0.811176	-1.18072	-0.369547	0.00221063	0.000184585	0.197664	0.0747079	0.0157027	0.633322
hsa-miR-1843	Yes	No	103.257	95.3618	98.3601	142.317	107.215	126.21	-0.422811	-0.144097	0.278714	0.0694629	0.602652	0.267052	0.483561	0.943798	0.695802
hsa-miR-18a-5p	Yes	No	39.4314	29.3363	32.8782	50.0976	42.7979	46.1069	-0.358591	-0.0683512	0.29024	0.175787	0.828157	0.31	0.663592	0.978731	0.722522
hsa-miR-191-5p	Yes	No	39.7509	33.3981	14.3974	253.645	124.19	160.988	-0.745415	-1.51315	-0.767737	0.141564	0.0120998	0.160323	0.625063	0.239782	0.592512
hsa-miR-199a-3p, hsa-miR-199b-3p	Yes	No	16.4638	14.8819	12.1786	54.0399	28.1034	24.8692	-0.802291	-1.29005	-0.487756	0.0261653	0.00271826	0.212604	0.309915	0.0984395	0.650148
hsa-miR-199a-5p	Yes	No	13.756	15.7159	12.295	15.4894	17.0219	17.6715	0.124869	0.268116	0.143247	0.486353	0.207361	0.454779	0.877499	0.705679	0.828726
hsa-miR-19b-3p	Yes	No	16.7486	19.4418	18.3537	27.0029	22.7115	19.4462	-0.219793	-0.517671	-0.297878	0.29445	0.039072	0.192253	0.773071	0.419469	0.623966
hsa-miR-203a-3p	Yes	Yes	76.8312	90.8358	57.9656	478.03	628.584	147.368	0.793104	-2.05968	-2.85278	0.0886027	0.000202113	1.36364e-08	0.52367	0.0164217	2.07615e-05
hsa-miR-205-5p	Yes	No	135.815	110.606	78.5975	296.432	479.289	263.441	0.749071	-0.636076	-1.38515	0.0765167	0.205909	0.00237307	0.497915	0.705234	0.0560155
hsa-miR-2053-5p:Novel	Yes	No	50.0108	41.4772	46.0295	61.4385	52.9764	59.2065	-0.217801	-0.0320498	0.185751	0.367403	0.911129	0.47582	0.828678	0.993733	0.838698
hsa-miR-6074-5p:Novel	Yes	Yes	12.1467	13.1878	15.2452	14.7327	27.4595	33.5989	0.816077	1.28585	0.469771	0.00686541	0.000317985	0.143059	0.160862	0.0229656	0.557872
hsa-miR-1290	Yes	Yes	30.6623	37.5635	28.0074	52.8829	88.7776	149.955	0.742802	1.52232	0.779519	0.0419363	0.000444025	0.0468561	0.391175	0.0307038	0.331806
hsa-miR-9902	Yes	Yes	15.7349	13.9623	18.8273	16.4787	23.4879	32.3009	0.48545	1.03459	0.549142	0.0565269	0.000573402	0.0420083	0.452902	0.0358376	0.318991
hsa-miR-223-3p	Yes	No	80.0173	102.334	59.7145	1117.08	639.69	718.253	-0.453683	-1.34666	-0.892976	0.396477	0.0342454	0.121437	0.844676	0.401796	0.529661
hsa-miR-223-5p	Yes	Yes	20.7116	29.1133	15.5049	130.48	63.0429	45.5302	-0.872707	-1.64052	-0.767808	0.0307186	0.000650038	0.0787163	0.335993	0.0398608	0.434223
hsa-miR-24-3p	Yes	No	49.4451	44.7193	27.4133	130.723	101.387	66.0817	-0.198861	-1.25392	-1.05506	0.599843	0.00546933	0.00996511	0.911614	0.148916	0.148821
hsa-miR-25-3p	Yes	No	23.0112	29.5829	15.2147	109.612	55.0687	60.5578	-0.845952	-1.239	-0.39305	0.040203	0.011549	0.377335	0.385364	0.234556	0.781092
hsa-miR-181a-5p	Yes	Yes	16.0065	15.0718	13.229	57.4792	32.7244	23.3059	-0.668176	-1.38516	-0.716979	0.0524012	0.000760074	0.055289	0.435511	0.0432126	0.363875
hsa-miR-142-5p	Yes	Yes	43.2251	32.63	23.7359	158.329	80.5508	60.6736	-0.873629	-1.53584	-0.662212	0.0224989	0.000752628	0.109384	0.288063	0.0432126	0.506191
hsa-let-7f-5p	Yes	Yes	49.3915	53.1863	44.2996	190.002	135.103	80.0973	-0.333685	-1.44261	-1.10893	0.360164	0.000891962	0.00486518	0.820315	0.0491335	0.0931728
hsa-miR-27a-5p	Yes	No	29.8957	35.7376	33.7243	53.5223	42.8471	41.5097	-0.307452	-0.392995	-0.0855422	0.216039	0.184013	0.750167	0.701641	0.683343	0.946254
hsa-let-7g-5p	Yes	Yes	78.356	77.7255	53.7469	280.708	179.834	110.124	-0.493203	-1.54322	-1.05002	0.207807	0.000925585	0.0129501	0.692413	0.0494724	0.168517
hsa-miR-30c-5p	Yes	No	13.3362	19.49	17.3887	73.8628	52.9934	34.4286	-0.247709	-1.37369	-1.12598	0.519132	0.00272602	0.00679939	0.889246	0.0984395	0.113137
hsa-miR-148a-3p	Yes	Yes	157.899	185.858	93.9546	1854.71	1267.81	752.864	-0.0290447	-1.81217	-1.78313	0.955286	0.00325492	0.00140198	0.990076	0.107944	0.0391407
hsa-miR-3119	Yes	No	31.4817	24.7212	26.274	39.2844	33.2839	32.0129	-0.208161	-0.315597	-0.107436	0.347277	0.231493	0.653882	0.815768	0.73176	0.920013
hsa-miR-3119-3p:Novel	Yes	No	28.391	25.1676	28.0004	36.641	32.2575	32.9422	-0.163434	-0.166524	-0.00308942	0.454902	0.522106	0.989564	0.862678	0.916964	0.99842
hsa-miR-3125	Yes	No	13.942	14.1812	16.4391	17.0447	22.6179	25.7944	0.474696	0.544249	0.0695524	0.070585	0.0797978	0.803733	0.483561	0.529271	0.97047
hsa-miR-3125-3p:Novel	Yes	No	28.9164	30.6238	22.2763	39.0734	34.6071	28.3087	-0.191269	-0.416799	-0.22553	0.357815	0.0935001	0.318046	0.820174	0.551498	0.727065
hsa-miR-3135a-3p:Novel	Yes	No	501.269	436.591	619.207	876.784	720.507	1031.78	-0.254923	0.448435	0.703358	0.351774	0.168169	0.0170969	0.817059	0.665408	0.194369
hsa-miR-3135b-3p:Novel	Yes	No	21.2224	23.6463	24.2086	24.0255	23.9398	25.7114	0.00547902	0.0545139	0.0490349	0.975984	0.800698	0.802069	0.994218	0.977782	0.970322
hsa-miR-3137-3p:Novel	Yes	No	28.3544	30.0914	27.9173	36.9515	42.7585	39.7169	0.167958	0.143798	-0.0241598	0.475939	0.607925	0.924142	0.874269	0.944254	0.995573
hsa-miR-3149-5p:Novel	Yes	No	17.0495	20.457	17.8931	21.9349	29.4493	24.0274	0.434049	0.145237	-0.288812	0.0679353	0.608078	0.258531	0.483561	0.944254	0.688736
hsa-miR-3153	Yes	No	15.7634	14.8672	17.4926	23.4773	22.5378	26.4106	-0.100438	0.238386	0.338824	0.71587	0.46665	0.253775	0.935784	0.891257	0.685608
hsa-miR-3156-5p	Yes	No	29.1742	23.7708	27.6631	29.4601	32.5744	37.1062	0.134805	0.377587	0.242782	0.50053	0.111532	0.257658	0.877802	0.586842	0.687991
hsa-miR-3159-3p:Novel	Yes	No	30.3459	33.1653	34.1863	38.6671	43.5519	45.2097	0.16225	0.262363	0.100113	0.468996	0.32427	0.677683	0.86878	0.793444	0.925021
hsa-miR-3168	Yes	No	69.2847	100.397	94.1367	120.413	136.892	123.822	0.187736	0.0366266	-0.151109	0.446295	0.900553	0.569377	0.860381	0.991871	0.883601
hsa-miR-3181	Yes	No	68.4598	76.4993	80.1297	101.266	151.858	141.714	0.579236	0.492812	-0.0864243	0.0810873	0.211775	0.808961	0.501393	0.71124	0.971096
hsa-miR-3202	Yes	No	17.6653	13.9843	14.8349	25.0667	22.9405	24.1529	-0.159786	0.0150266	0.174813	0.533219	0.960699	0.527626	0.894694	0.997645	0.869855
hsa-miR-3202-3p:Novel	Yes	No	12.7801	11.3038	15.7644	21.0054	18.777	25.1538	-0.225603	0.29548	0.521083	0.434148	0.387462	0.093059	0.853403	0.841039	0.472275
hsa-miR-320a-3p	Yes	No	12.7154	18.2172	12.9265	87.7656	117.569	45.1437	0.556598	-1.06082	-1.61742	0.257084	0.0696815	0.00228076	0.73905	0.51256	0.0549139
hsa-miR-320e	Yes	No	48.2754	48.8978	35.6039	62.3274	56.6041	55.3652	-0.144466	-0.119059	0.0254066	0.463835	0.611825	0.904999	0.867757	0.945958	0.993228
hsa-miR-329-5p	Yes	No	14.9455	16.0116	16.139	20.6285	21.669	26.8401	0.0265657	0.555764	0.529198	0.910716	0.0475364	0.0369546	0.981057	0.452722	0.29856
hsa-miR-3529-5p	Yes	No	23.0949	22.4821	23.1928	22.8309	24.7538	25.3179	0.116721	0.13771	0.0209887	0.541433	0.543994	0.918528	0.896518	0.9204	0.995573
hsa-miR-3615	Yes	No	29.1373	35.6814	23.7119	66.5489	74.0439	45.1859	0.176346	-0.656784	-0.83313	0.614721	0.115562	0.0276789	0.916871	0.590527	0.251589
hsa-miR-3650	Yes	No	10.2914	11.384	15.8079	13.1754	13.9265	17.1758	0.0688373	0.374935	0.306098	0.743125	0.1293	0.169957	0.942371	0.6232	0.602424
hsa-miR-3652	Yes	No	14.5646	16.9501	15.4338	16.5974	16.7376	15.3502	0.0218057	-0.0813947	-0.1032	0.877479	0.630551	0.500542	0.976637	0.951251	0.853865
hsa-miR-3659	Yes	No	34.3303	29.8602	30.6589	42.0309	33.7772	39.0113	-0.32773	-0.083603	0.244127	0.136276	0.74897	0.303777	0.61301	0.9729	0.719846
hsa-miR-3663-5p	Yes	No	15.9699	17.8113	18.7909	23.5545	24.5714	24.5577	0.0127258	0.111077	0.0983516	0.961018	0.719721	0.725837	0.990709	0.967889	0.939647
hsa-miR-3665	Yes	No	21.5401	22.7715	17.3274	22.968	30.148	21.9194	0.389551	-0.0198674	-0.409418	0.0435794	0.931501	0.0495288	0.401079	0.995162	0.34044
hsa-miR-3674	Yes	No	87.2311	103.946	118.25	109.567	103.557	120.308	-0.073932	0.118048	0.19198	0.74783	0.665661	0.438201	0.942462	0.960705	0.818516
hsa-miR-3675-5p	Yes	No	38.9704	38.5266	48.4171	63.0062	56.774	72.4686	-0.133945	0.163222	0.297167	0.642395	0.633706	0.338592	0.924876	0.951852	0.748093
hsa-miR-374a-3p	Yes	No	32.4577	39.2566	44.0966	41.5756	41.969	43.6042	0.0294322	0.042915	0.0134828	0.884455	0.858434	0.950685	0.976637	0.982423	0.997578
hsa-miR-376a-5p	Yes	No	47.9749	51.92	46.2628	63.0637	68.4318	69.8453	0.122628	0.153101	0.0304732	0.600392	0.582089	0.903753	0.911614	0.939678	0.993228
hsa-miR-378a-3p	Yes	No	25.8118	23.9035	24.2086	117.924	124.118	72.0527	0.202105	-0.776942	-0.979048	0.64686	0.138805	0.0396231	0.924881	0.637937	0.307787
hsa-miR-3908-3p:Novel	Yes	No	23.6588	21.4649	19.2568	24.8307	23.4751	20.1686	-0.0801581	-0.361186	-0.281028	0.630015	0.0700776	0.121288	0.924781	0.51256	0.529661
hsa-miR-3915	Yes	No	19.6281	19.49	19.403	20.5128	18.8171	20.9585	-0.113696	0.0287657	0.142461	0.313633	0.828583	0.237708	0.790883	0.978767	0.671838
hsa-miR-3916	Yes	No	32.4577	32.8474	29.6699	42.0001	41.0296	31.2206	-0.0531988	-0.362545	-0.309346	0.773202	0.100798	0.123052	0.950985	0.570184	0.530835
hsa-miR-3929-5p:Novel	Yes	No	84.8894	87.3775	104.246	100.613	101.897	111.572	0.0201221	0.145798	0.125676	0.908461	0.483094	0.504677	0.981057	0.90233	0.858028
hsa-miR-3936-5p:Novel	Yes	No	23.1387	24.82	23.6686	27.4748	30.2913	29.1282	0.109696	0.141259	0.0315633	0.532798	0.499632	0.867517	0.894557	0.910715	0.986491
hsa-miR-3941-5p:Novel	Yes	No	17.9126	16.9558	19.3267	20.7632	28.4742	17.9054	0.40797	-0.144228	-0.552198	0.0686068	0.591683	0.0229547	0.483561	0.942414	0.228421
hsa-miR-3960	Yes	No	36.4001	40.7927	33.892	37.8094	57.9673	45.2575	0.624764	0.316964	-0.3078	0.00571435	0.238806	0.205094	0.140776	0.741063	0.637798
hsa-miR-3976-3p:Novel	Yes	No	19.3375	20.9261	20.884	23.6669	22.356	22.704	-0.0816677	0.0188101	0.100478	0.622775	0.924133	0.575097	0.919683	0.994483	0.885324
hsa-miR-423-3p	Yes	No	93.8562	106.359	49.6087	181.355	177.429	163.618	0.0208028	-0.416604	-0.437407	0.951804	0.308683	0.23837	0.989581	0.782542	0.672053
hsa-miR-423-5p	Yes	No	30.6816	31.8394	15.4338	54.457	74.2593	45.6183	0.50686	-0.373658	-0.880517	0.182399	0.408988	0.0317587	0.672453	0.85593	0.27247
hsa-miR-4254	Yes	No	13.7397	17.0854	24.59	19.6346	24.1116	22.6785	0.28697	0.291501	0.0045305	0.225405	0.300257	0.985769	0.71846	0.773855	0.99842
hsa-miR-4263-5p:Novel	Yes	No	70.8445	37.6725	52.6707	94.1465	89.4047	84.0779	-0.278471	0.0101409	0.288612	0.362636	0.977761	0.381687	0.824059	0.998523	0.784842
hsa-miR-4265	Yes	No	19.1067	19.449	19.672	29.4362	28.1171	31.3913	-0.147199	-0.105815	0.0413836	0.599665	0.750663	0.891048	0.911614	0.9729	0.990987
hsa-miR-4279-5p:Novel	Yes	No	16.5304	14.9832	13.4274	20.2284	17.213	19.2125	-0.254399	0.0478299	0.302229	0.216934	0.844945	0.174395	0.701641	0.981792	0.605803
hsa-miR-4280	Yes	No	16.2833	24.2439	18.671	32.1638	40.0208	27.4675	0.306212	-0.259594	-0.565806	0.315877	0.475833	0.0862123	0.791305	0.897018	0.447981
hsa-miR-4285	Yes	No	17.0625	21.2718	23.6223	23.2779	38.0757	37.6685	0.651886	0.734824	0.0829384	0.0324441	0.0422415	0.79949	0.342648	0.442855	0.968742
hsa-miR-4302	Yes	No	18.1894	20.8617	19.3642	75.2021	93.8982	70.1734	0.60125	-0.531573	-1.13282	0.19797	0.338729	0.0244706	0.682284	0.805319	0.237303
hsa-miR-4309-3p:Novel	Yes	No	24.2934	19.6398	13.3973	38.2837	25.9692	21.8908	-0.783831	-0.832627	-0.048796	0.00215837	0.00642827	0.861131	0.0738892	0.160707	0.983146
hsa-miR-4430	Yes	No	29.5751	27.1571	30.6299	32.8398	31.7063	32.7579	-0.0483722	0.0127154	0.0610876	0.812195	0.958094	0.7807	0.961962	0.997645	0.957585
hsa-miR-4431	Yes	No	18.3974	17.5725	17.1151	20.5042	19.8098	19.3672	-0.0629017	-0.0634408	-0.000539061	0.731997	0.771762	0.997833	0.939937	0.976522	0.998851
hsa-miR-4441-5p:Novel	Yes	No	14.6435	17.521	13.9227	25.3265	18.8478	17.6864	-0.416943	-0.589811	-0.172867	0.060804	0.0265001	0.476186	0.471699	0.35529	0.838698
hsa-miR-4443	Yes	No	11.7429	16.1861	11.1382	16.0205	19.8376	13.8548	0.292322	-0.286162	-0.578484	0.249311	0.346721	0.0355258	0.735254	0.806301	0.292356
hsa-miR-4454	Yes	No	360.2	448.426	543.948	519.891	519.996	622.572	0.0100811	0.222711	0.21263	0.968351	0.460828	0.43726	0.992447	0.888311	0.818516
hsa-miR-4472-2-3p:Novel	Yes	No	24.5533	24.3803	21.0192	31.6871	24.8799	24.8768	-0.30647	-0.393014	-0.0865431	0.114326	0.0891066	0.681098	0.570841	0.543352	0.925021
hsa-miR-4473-5p:Novel	Yes	No	18.2	17.1979	21.1231	19.7792	18.2398	20.28	-0.124583	0.0426331	0.167216	0.467654	0.833868	0.365016	0.867758	0.979381	0.773272
hsa-miR-4478	Yes	No	19.0585	15.4942	14.7951	20.0601	23.6525	20.4092	0.248758	0.0273923	-0.221366	0.272503	0.919231	0.364558	0.753744	0.994481	0.773036
hsa-miR-4489	Yes	No	22.4182	24.7212	22.8444	26.7425	26.9435	31.9387	0.0120212	0.343115	0.331094	0.947779	0.114395	0.0922101	0.987649	0.590356	0.468747
hsa-miR-4495	Yes	No	17.7816	29.1754	14.0033	33.9651	35.6719	22.7525	0.10237	-0.647486	-0.749856	0.728905	0.0666625	0.0192227	0.938306	0.507385	0.206831
hsa-miR-4505-3p:Novel	Yes	No	69.0916	59.9531	47.3371	83.5737	64.5343	60.5425	-0.378243	-0.462753	-0.0845099	0.0674088	0.0602264	0.705599	0.483561	0.5047	0.933113
hsa-miR-4509-3p:Novel	Yes	No	18.9467	19.1056	18.346	54.0649	31.4265	28.7815	-0.864471	-0.882283	-0.017812	0.00508827	0.0164089	0.957543	0.135482	0.288681	0.997578
hsa-miR-4632-5p	Yes	No	15.7349	14.9832	16.1692	17.7282	18.8182	15.4736	0.0831367	-0.160282	-0.243419	0.664647	0.485511	0.242232	0.927188	0.904247	0.677316
hsa-miR-4636	Yes	No	24.4497	19.0158	21.9924	26.0939	20.1333	27.7643	-0.385461	0.11369	0.499151	0.0212995	0.564074	0.00550432	0.277948	0.931998	0.0997658
hsa-miR-4636-3p:Novel	Yes	No	18.3667	17.4938	17.1151	21.4039	19.432	22.4472	-0.171248	0.111426	0.282673	0.345852	0.604209	0.147732	0.815768	0.944254	0.567267
hsa-miR-4654	Yes	No	15.1038	17.0919	22.7469	21.6799	21.1849	24.0701	-0.0208537	0.12728	0.148133	0.924482	0.625534	0.530744	0.982695	0.950027	0.870575
hsa-miR-4659a-5p	Yes	No	21.2567	22.0022	22.4904	35.9231	30.0346	31.3494	-0.260954	-0.206108	0.0548457	0.265068	0.459263	0.82839	0.750505	0.888311	0.974172
hsa-miR-4670-3p	Yes	No	36.4401	25.1454	27.3239	42.5692	34.4597	33.0337	-0.328108	-0.322295	0.00581335	0.105908	0.18264	0.978918	0.558701	0.680711	0.998204
hsa-miR-4690-5p	Yes	No	22.4341	21.4649	17.5351	28.6652	28.8258	30.3703	-0.125471	0.126892	0.252363	0.655397	0.70423	0.405149	0.927188	0.966559	0.802661
hsa-miR-4693-3p	Yes	No	92.6187	83.8564	123.562	113.085	130.194	156.207	0.156885	0.485135	0.328249	0.55909	0.128367	0.256127	0.897021	0.621747	0.686186
hsa-miR-4698	Yes	No	14.5646	16.2397	28.5555	33.6649	32.1686	49.2082	-0.149266	0.847378	0.996644	0.680427	0.0486455	0.0105058	0.92933	0.455614	0.149405
hsa-miR-4698-5p:Novel	Yes	No	85.3126	89.4369	177.048	190.194	173.013	274.424	-0.268589	0.817743	1.08633	0.492267	0.0784839	0.00991879	0.877802	0.529196	0.148821
hsa-miR-4717-5p	Yes	No	34.7955	30.1436	26.4506	46.6501	41.9348	38.7062	-0.182265	-0.240648	-0.058383	0.460955	0.413687	0.827037	0.865551	0.859643	0.974172
hsa-miR-492	Yes	No	15.8931	16.5879	15.3432	19.885	23.4043	19.9416	0.250717	-0.152173	-0.402891	0.296521	0.595365	0.120161	0.773071	0.943798	0.526643
hsa-miR-494-5p	Yes	No	68.1982	51.1936	50.5673	93.9488	79.3527	82.9635	-0.249151	-0.180412	0.0687386	0.375463	0.58933	0.820599	0.830884	0.941911	0.971935
hsa-miR-499b-5p	Yes	No	40.7883	32.7758	48.7294	56.6476	50.6136	60.5429	-0.166953	0.105798	0.272751	0.566496	0.759744	0.384582	0.898486	0.975745	0.784842
hsa-miR-5087	Yes	No	35.4358	28.2886	10.9088	58.9832	43.9889	25.8634	-0.458185	-1.2933	-0.835114	0.195823	0.00222888	0.0297207	0.680987	0.0852221	0.262317
hsa-miR-511-3p	Yes	No	27.0838	26.6221	28.5234	32.4513	50.8718	51.158	0.591838	0.796327	0.204489	0.0706133	0.0405573	0.560695	0.483561	0.426573	0.881423
hsa-miR-5192	Yes	No	274.102	244.871	286.473	343.61	380.9	432.845	0.0894829	0.343519	0.254037	0.733126	0.270782	0.368876	0.939937	0.764771	0.773573
hsa-miR-519a-5p, hsa-miR-519c-5p, hsa-miR-519b-5p, hsa-miR-523-5p, hsa-miR-518e-5p, hsa-miR-522-5p	Yes	No	23.5537	25.8998	23.9866	25.9307	32.5354	23.0533	0.296405	-0.10268	-0.399086	0.11665	0.65014	0.051042	0.573676	0.956521	0.343856
hsa-miR-526a-5p, hsa-miR-520c-5p, hsa-miR-518d-5p	Yes	No	533.212	759.95	662.15	1074.96	1289.78	1259.47	0.15219	0.266971	0.114781	0.672259	0.532426	0.767127	0.929203	0.9204	0.95448
hsa-miR-548f-3p	Yes	No	18.1481	16.3885	19.449	20.6268	19.2578	19.9093	-0.0939332	-0.115883	-0.0219493	0.579062	0.564966	0.904502	0.902132	0.932191	0.993228
hsa-miR-550a-3-5p	Yes	No	27.586	32.7525	38.4674	56.8081	59.8432	70.3636	0.0498896	0.556499	0.50661	0.873799	0.135856	0.133961	0.976637	0.631764	0.544817
hsa-miR-550a-5p	Yes	No	20.6895	16.4817	21.2084	31.7504	32.2214	38.7023	-0.0204202	0.523009	0.54343	0.944777	0.135019	0.0864599	0.987483	0.630477	0.448501
hsa-miR-550b-3p	Yes	No	16.9539	16.1273	18.631	28.7096	30.3043	36.356	0.0333084	0.564679	0.53137	0.914466	0.125052	0.110931	0.982695	0.615126	0.507945
hsa-miR-221-3p	Yes	Yes	17.8898	24.8043	12.0554	104.748	106.332	51.4165	0.256744	-1.33539	-1.59213	0.581379	0.0160437	0.0015452	0.902542	0.286495	0.0416385
hsa-miR-5684	Yes	No	49.9308	61.5208	51.8169	79.3713	75.5347	75.0185	-0.073904	-0.0819563	-0.0080523	0.772686	0.787608	0.976708	0.950985	0.97765	0.997578
hsa-miR-5693	Yes	No	14.611	15.9021	17.4926	17.6348	19.5503	19.5375	0.101954	0.188644	0.0866901	0.637481	0.463271	0.709274	0.924781	0.889746	0.933113
hsa-miR-5694	Yes	No	29.8132	24.7212	28.6628	35.7045	31.2038	33.7756	-0.283324	-0.0506559	0.232668	0.192591	0.844596	0.321754	0.680975	0.981737	0.730296
hsa-miR-5704-3p:Novel	Yes	No	318.774	238.115	209.313	409.225	317.765	246.903	-0.356732	-0.7688	-0.412068	0.106823	0.00348312	0.0842119	0.558701	0.113201	0.446281
hsa-miR-595-5p:Novel	Yes	No	77.8658	72.5315	64.0444	83.8216	75.5436	84.9682	-0.226218	0.0629841	0.289202	0.303972	0.809686	0.222813	0.783255	0.977782	0.656792
hsa-miR-22-3p	Yes	Yes	14.1283	16.4567	12.295	70.2739	161.15	30.127	1.30236	-1.35895	-2.66132	0.00614062	0.0165233	2.23262e-07	0.147152	0.288681	0.000135967
hsa-miR-6075-5p:Novel	Yes	No	32.0762	28.334	30.6299	39.5799	33.2185	36.8581	-0.254145	-0.0017431	0.252402	0.136189	0.993134	0.170545	0.61301	0.999449	0.602424
hsa-miR-6078	Yes	No	35.5632	37.9524	36.374	42.9964	40.1696	41.2547	-0.103816	-0.028758	0.0750583	0.524562	0.882169	0.669906	0.890674	0.987616	0.925021
hsa-miR-611-5p:Novel	Yes	No	17.3978	21.7072	20.5503	21.2813	27.4981	35.5019	0.321237	0.837303	0.516067	0.21988	0.00690141	0.0649382	0.708563	0.171218	0.390013
hsa-miR-6131	Yes	No	48.1648	51.4023	45.2427	68.0128	93.8349	83.1591	0.447314	0.242721	-0.204593	0.119181	0.476887	0.507871	0.579801	0.898145	0.860095
hsa-miR-622-5p:Novel	Yes	No	27.8971	26.2407	35.5059	36.7203	32.579	37.171	-0.157401	-0.0138476	0.143554	0.411345	0.951432	0.486697	0.845168	0.997645	0.846853
hsa-miR-623-3p:Novel	Yes	No	20.5798	19.9127	17.8931	25.5395	23.2678	23.6798	-0.133291	-0.114577	0.0187138	0.489046	0.617149	0.928383	0.877802	0.94684	0.995573
hsa-miR-629-5p	Yes	No	15.7634	15.7867	8.61765	22.3267	23.3289	14.8897	0.104855	-0.65395	-0.758805	0.692916	0.040254	0.00874867	0.929409	0.424758	0.136614
hsa-miR-632-5p:Novel	Yes	No	18.593	21.6919	17.8304	24.1974	27.8818	22.1504	0.198718	-0.0957155	-0.294434	0.411538	0.740281	0.259966	0.845168	0.972872	0.691224
hsa-miR-641	Yes	No	23.068	23.7708	30.0647	26.0256	26.2582	36.6946	-0.0108432	0.495414	0.506257	0.954331	0.0265648	0.0122312	0.989621	0.35529	0.163129
hsa-miR-645-5p:Novel	Yes	No	21.6166	16.1273	19.5727	26.9362	28.9155	21.2848	0.0993379	-0.371572	-0.47091	0.662859	0.172828	0.0567688	0.927188	0.672216	0.366276
hsa-miR-647	Yes	No	25.391	22.3596	22.7469	29.2339	25.5686	23.2654	-0.188276	-0.333104	-0.144828	0.254103	0.0914772	0.420423	0.735254	0.547919	0.814986
hsa-miR-6728-5p	Yes	No	74.2095	56.0069	52.0521	77.1934	69.3398	74.6827	-0.234387	-0.0295525	0.204835	0.337612	0.918996	0.437109	0.814223	0.994481	0.818516
hsa-miR-6788-3p	Yes	No	20.9878	18.4475	18.9378	23.7485	22.1403	23.3359	-0.139842	0.0397603	0.179602	0.466144	0.861546	0.385591	0.867758	0.982423	0.784842
hsa-miR-6846-3p	Yes	No	62.2519	63.4151	74.2443	69.4271	74.2722	90.5414	0.080906	0.396209	0.315303	0.707569	0.121646	0.173803	0.934913	0.607297	0.605803
hsa-miR-6846-5p	Yes	No	65.2886	67.6588	81.8495	73.8374	79.438	95.9855	0.0876993	0.393847	0.306148	0.670711	0.107648	0.167313	0.929203	0.580191	0.600079
hsa-miR-27b-3p	Yes	Yes	45.5654	50.9867	25.8189	143.353	225.791	76.5007	0.786358	-1.07544	-1.86179	0.0834404	0.0466914	0.000145297	0.503619	0.452722	0.00869222
hsa-miR-7113-5p	Yes	No	468.799	411.661	535.815	584.176	497.824	629.748	-0.264693	0.118276	0.382969	0.257378	0.67024	0.128267	0.73905	0.961432	0.535299
hsa-miR-769-5p	Yes	No	14.611	17.2433	10.879	24.1646	25.9597	24.2876	0.150329	-0.149759	-0.300088	0.604539	0.664588	0.337552	0.912181	0.960705	0.748093
hsa-miR-7704	Yes	No	24.7956	24.8171	18.6602	29.6507	29.2524	23.4987	-0.0277671	-0.364998	-0.337231	0.891463	0.133669	0.12696	0.976637	0.62756	0.535195
hsa-miR-7844-5p	Yes	No	17.7816	17.2645	20.2269	19.8063	29.3473	22.4194	0.530474	0.237579	-0.292895	0.0230891	0.393309	0.242698	0.290994	0.843732	0.677374
hsa-miR-7851-5p:Novel	Yes	No	87.6834	91.2698	107.724	99.127	96.4789	103.306	-0.0341398	0.041456	0.0755958	0.841708	0.838276	0.681387	0.967955	0.979381	0.925021
hsa-miR-8052	Yes	No	14.1955	15.1961	15.7072	18.3079	19.4765	18.0381	0.0848197	-0.0652857	-0.150105	0.676273	0.787403	0.493418	0.929203	0.97765	0.850751
hsa-miR-8067	Yes	No	22.6052	20.7583	36.3582	40.2891	34.2026	53.5919	-0.281278	0.594272	0.87555	0.339069	0.0884617	0.00565816	0.815499	0.543318	0.0999587
hsa-miR-8072-3p:Novel	Yes	No	11.4332	15.181	11.2973	12.5342	18.5285	16.2367	0.560872	0.423817	-0.137055	0.0153162	0.123175	0.577999	0.238692	0.610241	0.886784
hsa-miR-8085	Yes	No	19.7043	19.8752	23.863	22.9863	23.3818	24.547	0.045178	0.0653645	0.0201865	0.818783	0.780007	0.9241	0.96284	0.976845	0.995573
hsa-miR-8086-3p:Novel	Yes	No	36.0167	41.7234	39.344	40.1937	45.3692	44.5859	0.18794	0.123357	-0.0645828	0.286028	0.555676	0.733011	0.763206	0.926717	0.940827
hsa-miR-8485	Yes	No	36.827	43.9172	52.0521	51.7992	61.6202	77.7573	0.286895	0.551173	0.264278	0.320989	0.108183	0.394862	0.796278	0.580191	0.791407
hsa-miR-92a-3p	Yes	No	25.391	28.5236	17.045	95.104	60.2524	42.6858	-0.505125	-1.40238	-0.897255	0.216822	0.00400117	0.0424473	0.701641	0.121055	0.319931
hsa-miR-934-3p:Novel	Yes	No	12.2649	11.4363	16.3371	15.5524	14.3475	16.7319	-0.107549	0.0921389	0.199688	0.60318	0.706551	0.368537	0.912181	0.966559	0.773573
hsa-miR-941	Yes	No	16.0977	24.4917	9.68343	69.4379	40.9215	53.9658	-0.552704	-0.799498	-0.246793	0.19267	0.113035	0.589826	0.680975	0.586842	0.891252
hsa-miR-558-5p:Novel	Yes	Yes	15.2346	15.192	19.9915	22.2078	17.315	34.6064	-0.307491	0.583658	0.891149	0.223921	0.049488	0.000950957	0.717201	0.458898	0.0311362
hsa-miR-99a-5p	Yes	No	90.8954	131.654	77.5589	295.631	352.469	256.318	0.391556	-0.498587	-0.890143	0.34756	0.314421	0.0475335	0.815768	0.789088	0.332792
hsa-let-7a-2-3p	No	No	1.12392	0.973565	1.18361	1.07573	1.27965	1.41177	0.367886	0.287476	-0.0804095	0.300295	0.492973	0.824958	NA	0.905807	0.974172
hsa-let-7a-3p	No	No	4.41474	5.86735	4.66775	9.30422	8.51612	5.68769	-0.0954201	-0.747883	-0.652463	0.74673	0.0367403	0.0457265	0.942462	0.411745	0.329166
hsa-let-7b-3p	No	No	0.766557	1.03367	0	1.00489	1.30929	1.83914	0.413506	0.537152	0.123646	0.354182	0.293325	0.782319	NA	0.773855	0.957643
hsa-let-7c-3p	No	No	1.82932	1.3982	1.33287	2.30757	2.20942	2.73594	-0.102754	0.0856979	0.188452	0.75847	0.825585	0.593042	0.946203	0.977782	0.89176
hsa-let-7d-3p	No	No	1.77444	2.78429	2.20483	6.86844	5.01944	3.75291	-0.347042	-0.968422	-0.621379	0.430977	0.0683224	0.20043	0.850341	0.509346	0.634417
hsa-let-7d-5p	No	No	4.59934	4.31083	3.4796	10.2912	9.0713	6.19749	-0.0530253	-0.890083	-0.837057	0.881926	0.0387167	0.0327613	0.976637	0.419469	0.277106
hsa-let-7e-3p	No	No	1.1375	0.399663	0	1.16577	1.00428	0.93038	-0.274402	-0.114312	0.160091	0.546989	0.835928	0.751084	NA	0.979381	0.946627
hsa-let-7e-5p	No	No	2.65614	2.02328	2.66575	2.75157	2.66572	2.85838	0.00791203	0.151199	0.143287	0.976114	0.62504	0.606127	0.994218	0.950027	0.89813
hsa-let-7f-1-3p	No	No	1.12392	0.629039	1.24947	1.62173	1.1225	1.60681	-0.477746	-0.0481489	0.429597	0.225397	0.916252	0.311577	NA	0.994481	0.722522
hsa-let-7f-2-3p	No	No	1.12392	1.06395	1.14222	1.63593	1.30316	1.49494	-0.313148	-0.112483	0.200665	0.351793	0.7768	0.583087	NA	0.976845	0.888194
hsa-let-7g-3p	No	No	0	0	0	0.477122	0.507001	0.663075	0.0101273	0.0206015	0.0104742	0.985428	0.974643	0.985626	NA	NA	NA
hsa-let-7i-3p	No	No	0.457329	0.642346	0.591806	0.952176	1.20826	0.886033	0.24395	-0.412085	-0.656035	0.543339	0.408777	0.141725	NA	0.85593	0.556321
hsa-miR-1-2-5p:Novel	No	Yes	3.84065	4.55712	4.61052	4.20067	6.84575	28.0781	0.686371	2.72851	2.04214	0.0939922	9.28161e-09	1.35199e-06	0.535746	3.01652e-05	0.000485207
hsa-miR-1-3p	No	No	6.82501	7.08147	6.81801	7.30879	8.63091	8.48549	0.184585	0.27132	0.0867354	0.397952	0.294452	0.708732	0.844676	0.773855	0.933113
hsa-miR-1-5p	No	No	2.75227	2.33071	1.97799	3.3961	2.73681	2.57889	-0.261565	-0.309407	-0.0478419	0.279278	0.287277	0.858281	0.758226	0.773855	0.981983
hsa-miR-100-3p	No	No	0.67847	0	0.461052	0.918965	0.5849	0.635164	-0.592475	-0.299288	0.293187	0.148985	0.535732	0.517492	NA	NA	NA
hsa-miR-100-5p	No	No	5.29769	3.4309	3.22781	6.00901	8.94478	4.99961	0.593206	-0.344501	-0.937707	0.0912323	0.416881	0.0142245	0.52971	0.860778	0.173536
hsa-miR-101-2-5p	No	No	1.74275	1.23167	1.09594	2.4344	1.57229	1.96661	-0.627728	-0.161474	0.466254	0.078692	0.698653	0.230748	0.497915	0.965811	0.662856
hsa-miR-101-3p	No	Yes	10.77	13.6642	9.17686	136.666	42.6318	29.1407	-1.55947	-2.30174	-0.74227	0.000658156	2.46022e-05	0.134246	0.0357407	0.00363442	0.544817
hsa-miR-101-5p	No	No	2.65614	3.53179	2.20483	3.47275	3.98554	2.48887	0.176578	-0.405829	-0.582407	0.468115	0.180943	0.0334619	0.867758	0.679938	0.280331
hsa-miR-10226	No	No	6.18064	7.19383	8.35361	6.88785	12.0393	10.3505	0.675831	0.710639	0.0348081	0.0116161	0.0251346	0.901771	0.202781	0.352319	0.993228
hsa-miR-10226-3p:Novel	No	No	1.12392	1.39871	1.39227	1.4092	2.10692	1.81215	0.623364	0.419032	-0.204331	0.0970876	0.343988	0.595114	0.538785	0.806301	0.893992
hsa-miR-10392-3p	No	No	0.624187	0	0	0.87493	1.17961	0.310205	0.408133	-1.32483	-1.73296	0.404296	0.0372329	0.00257211	NA	0.412993	NA
hsa-miR-10393-3p	No	No	2.79838	2.33071	2.36722	3.1654	3.08586	2.98151	-0.0793455	0.0105684	0.0899139	0.729235	0.969005	0.714825	0.938306	0.997645	0.935118
hsa-miR-10393-5p	No	No	0.65719	0	0.666437	0.734195	0.629083	1.0167	-0.285895	0.196404	0.482299	0.474267	0.66454	0.2409	NA	0.960705	NA
hsa-miR-10394-3p	No	No	2.20531	3.03492	2.49894	2.88008	3.14083	3.02535	0.0827258	-0.000400684	-0.0831265	0.763898	0.99903	0.779238	0.94895	0.999681	0.957514
hsa-miR-10394-5p	No	No	0.828465	0.250743	0	0.956875	0.802128	0.79333	-0.207699	-0.235227	-0.027528	0.584563	0.603424	0.946984	NA	0.944212	NA
hsa-miR-10395-3p	No	No	1.39919	1.89733	1.42643	2.9692	2.68519	2.8034	-0.0578023	-0.294103	-0.236301	0.872083	0.48915	0.541307	0.976637	0.905807	0.875348
hsa-miR-10395-5p	No	No	0	0.615833	0.777959	0.926279	1.07987	1.3065	0.309912	0.474323	0.16441	0.518527	0.395645	0.738212	NA	0.844692	0.943219
hsa-miR-10396a-3p	No	No	0	0	0	0.602027	1.00226	0.383574	0.463541	-0.584619	-1.04816	0.383425	0.376065	0.0748198	NA	NA	NA
hsa-miR-10396a-5p	No	No	1.11135	1.17726	0.922105	1.28858	1.35742	1.23771	0.0977027	0.0766309	-0.0210718	0.773787	0.849387	0.953207	NA	0.982423	0.997578
hsa-miR-10396b-3p	No	No	0	0	0	0.449321	1.06963	0.448028	0.868726	-0.00628524	-0.875011	0.122113	0.99271	0.144874	NA	0.999449	NA
hsa-miR-10396b-5p	No	No	0	0	0.461052	0.573859	0.713877	0.721973	0.213883	0.398504	0.184621	0.660576	0.482013	0.710775	NA	NA	NA
hsa-miR-10397-3p	No	Yes	4.30607	4.70906	3.57914	5.4152	7.08066	3.71983	0.35491	-0.556219	-0.911129	0.157068	0.0743545	0.00120938	0.640769	0.518567	0.0355929
hsa-miR-10397-5p	No	No	2.24784	2.59781	3.74841	3.28524	3.58969	4.73661	0.0952303	0.479044	0.383813	0.70194	0.0929045	0.129914	0.930963	0.549688	0.535301
hsa-miR-10398-3p	No	Yes	0.67847	1.04772	0	1.1077	5.12086	0.671997	2.0435	-0.320062	-2.36356	0.0011156	0.684342	0.000628884	0.0494035	0.962808	0.024844
hsa-miR-10398-5p	No	No	0.640108	0	0	0.743659	0.701734	0.355294	-0.198403	-0.949574	-0.751171	0.635227	0.0768739	0.130225	NA	NA	NA
hsa-miR-10399-3p	No	No	1.37614	1.07483	1.55592	2.08808	1.23353	1.31748	-0.571433	-0.845194	-0.273761	0.0650637	0.0276662	0.452795	NA	0.362561	0.828031
hsa-miR-10399-5p	No	No	0.861214	0.250743	0	0.988831	0.749237	0.599825	-0.319465	-0.429156	-0.109691	0.38878	0.339995	0.792508	NA	0.80597	NA
hsa-miR-103a-1-5p	No	No	0	0	0	0.729252	0.465614	0.576036	-0.555496	-0.150231	0.405265	0.222495	0.77553	0.406172	NA	NA	NA
hsa-miR-103a-2-5p	No	No	2.43565	2.35453	2.96699	3.2819	2.9411	3.28656	-0.113007	-0.0282733	0.0847333	0.670291	0.927978	0.76562	0.929203	0.994681	0.95448
hsa-miR-103a-3p	No	Yes	6.07336	5.54932	4.14947	39.7378	16.6137	12.5507	-0.976577	-1.95676	-0.980186	0.025589	0.000188432	0.0400565	0.306603	0.0157027	0.308573
hsa-miR-103b-3p:Novel	No	No	0.914658	0.642346	1.10749	1.15024	0.811718	1.20821	-0.403763	0.20402	0.607784	0.247997	0.599245	0.089722	NA	0.943798	NA
hsa-miR-103b-5p	No	Yes	4.60033	5.54249	4.30883	34.9576	15.2742	12.3451	-0.933055	-1.77238	-0.839322	0.033822	0.000756893	0.0799572	0.348261	0.0432126	0.438684
hsa-miR-10400-3p	No	No	1.16183	0.999157	1.10241	1.59029	1.16963	1.35115	-0.329348	-0.0888772	0.240471	0.358615	0.833751	0.53794	NA	0.979381	0.873023
hsa-miR-10401-3p	No	No	0	0.819424	0	0.70199	1.08492	0.86816	0.488498	0.0549036	-0.433594	0.272343	0.918303	0.352842	NA	0.994481	NA
hsa-miR-10401-5p	No	No	1.51834	1.2966	1.14222	2.00583	1.65583	1.34635	-0.35698	-0.556475	-0.199495	0.243433	0.138684	0.568956	0.734725	0.637937	0.883601
hsa-miR-105-3p	No	No	2.03541	2.06735	2.19188	2.79041	2.4264	2.11807	-0.15511	-0.116176	0.0389336	0.514695	0.684466	0.881193	0.885597	0.962808	0.990987
hsa-miR-105-5p	No	Yes	6.27578	5.16837	6.66437	6.87725	15.6769	6.78837	1.12341	0.0504998	-1.07291	0.00106127	0.902825	0.00375586	0.0482329	0.991871	0.0778
hsa-miR-10522-3p:Novel	No	No	1.16183	1.10138	1.24947	1.46106	1.41629	1.1269	-0.0196583	-0.277715	-0.258057	0.953814	0.507554	0.497542	NA	0.911072	0.85339
hsa-miR-10522-5p	No	No	0	0	0.461052	0.547054	0.820205	0.760277	0.270491	0.315506	0.0450147	0.562792	0.562459	0.9247	NA	NA	NA
hsa-miR-10523-3p:Novel	No	No	7.86745	8.76049	7.00163	9.00295	9.78525	7.20737	0.0625649	-0.319317	-0.381881	0.714588	0.125994	0.0435499	0.935784	0.615758	0.324229
hsa-miR-10523-5p	No	No	4.55001	6.51927	6.96134	8.70529	7.686	8.81516	-0.228349	0.0763279	0.304677	0.365908	0.798321	0.262542	0.828638	0.977782	0.692157
hsa-miR-10524-3p:Novel	No	No	2.49675	2.59781	2.459	3.57987	4.49928	3.41697	0.251254	0.000421275	-0.250833	0.400021	0.999065	0.437212	0.844676	0.999681	0.818516
hsa-miR-10524-5p	No	No	0.828465	0	0	1.21094	0.703953	0.791966	-0.816059	-0.710445	0.105614	0.0464066	0.146745	0.822215	NA	0.640049	NA
hsa-miR-10525-3p	No	No	0.914658	1.04772	0.923954	1.16986	1.03204	1.22909	-0.419409	-0.227553	0.191856	0.205724	0.558924	0.597667	NA	0.929158	0.894425
hsa-miR-10525-5p:Novel	No	No	3.48549	3.10273	2.6097	3.39726	3.4654	2.87011	0.0158955	-0.16198	-0.177876	0.940909	0.533577	0.448609	0.985412	0.9204	0.82447
hsa-miR-10526-3p	No	No	1.37614	1.55137	1.39227	1.85371	1.68821	1.55249	-0.0601741	-0.157066	-0.0968914	0.838698	0.656517	0.762081	0.967431	0.957665	0.953384
hsa-miR-10526-5p:Novel	No	No	2.09193	3.00892	3.66203	2.87507	3.14015	3.99139	0.0601858	0.427597	0.367411	0.792579	0.101886	0.112163	0.956821	0.570184	0.509757
hsa-miR-10527-3p:Novel	No	No	0	0	0	0.534896	0.532391	0.520804	-0.136186	0.139092	0.275278	0.77271	0.800287	0.575898	NA	NA	NA
hsa-miR-10527-5p	No	No	1.53311	1.90158	1.33287	2.02836	2.2153	1.98639	0.168203	0.0947566	-0.0734467	0.578153	0.79261	0.819179	0.90196	0.97765	0.971718
hsa-miR-106a-3p	No	No	1.24837	1.87735	1.3137	1.28862	1.91597	1.63947	0.453835	0.0372139	-0.416621	0.116616	0.915859	0.17019	0.573676	0.994481	0.602424
hsa-miR-106a-5p	No	No	1.28022	1.09336	1.22068	1.53417	1.03586	1.52303	-0.418553	-0.0253511	0.393202	0.192038	0.944864	0.248542	NA	0.997645	0.68181
hsa-miR-107	No	No	3.41251	3.0754	3.22781	4.16658	3.98093	4.99207	-0.0328253	0.223201	0.256027	0.898489	0.457285	0.344822	0.977473	0.886056	0.752109
hsa-miR-107-5p:Novel	No	No	6.39737	5.43833	5.07158	7.37834	6.83773	8.37868	-0.145501	0.210059	0.35556	0.539955	0.451121	0.159945	0.896518	0.880567	0.592497
hsa-miR-10a-3p	No	No	0.697309	1.2966	0.923954	0.881059	1.52163	0.960339	0.654512	0.0811262	-0.573386	0.0538077	0.846888	0.107762	NA	0.982423	0.501877
hsa-miR-10a-5p	No	No	6.86606	5.76249	6.10338	7.89221	7.1551	7.40358	-0.187981	-0.0966561	0.0913246	0.366742	0.696406	0.686134	0.828678	0.964546	0.927692
hsa-miR-10b-3p	No	No	0.828465	1.10138	2.21498	1.43259	1.44906	1.99301	0.0758876	0.390019	0.314132	0.81419	0.292014	0.337039	0.96239	0.773855	0.74802
hsa-miR-10b-5p	No	No	2.79838	1.95578	1.99931	3.03145	2.42593	2.68556	-0.310731	-0.167835	0.142896	0.216262	0.569624	0.599598	0.701641	0.932191	0.895642
hsa-miR-11181-3p	No	Yes	1.92033	1.57159	1.77934	11.1778	2.08283	1.92688	-2.45573	-2.5015	-0.0457668	9.52213e-09	1.50665e-06	0.92619	2.51003e-05	0.000544069	0.995573
hsa-miR-11181-5p	No	No	0	0	0	0.833391	0.847654	0.530819	0.226095	-0.726591	-0.952685	0.634305	0.224782	0.077405	NA	0.725462	NA
hsa-miR-11399	No	No	6.08912	7.08147	7.90396	8.04119	8.42721	8.60739	0.0990086	0.145599	0.0465899	0.592935	0.506156	0.812837	0.910099	0.911072	0.971096
hsa-miR-11399-3p:Novel	No	No	2.43565	3.80315	2.85286	2.7204	3.98164	3.44401	0.567085	0.28844	-0.278646	0.0114225	0.278589	0.220805	0.200731	0.769846	0.654715
hsa-miR-11400	No	No	4.85507	4.77063	5.91806	6.51637	5.5883	5.94971	-0.236867	-0.107549	0.129318	0.211808	0.631709	0.52923	0.69549	0.951369	0.870117
hsa-miR-11400-3p:Novel	No	No	2.24784	3.10102	3.33218	2.64546	3.46924	3.7254	0.451618	0.443132	-0.00848516	0.062959	0.115504	0.972135	0.478564	0.590527	0.997578
hsa-miR-11401	No	No	3.20054	2.14967	1.77934	4.20628	3.94507	2.30012	-0.11913	-0.831069	-0.711939	0.682326	0.021944	0.0326801	0.929346	0.330592	0.277106
hsa-miR-11401-3p:Novel	No	No	1.21782	1.17726	1.10241	1.30748	1.31595	1.49126	-0.0757717	0.100655	0.176427	0.820077	0.79325	0.609901	NA	0.97765	0.900117
hsa-miR-1178-3p	No	No	0.861214	0	0	1.04444	0.82038	0.611101	-0.14804	-0.892931	-0.744891	0.705554	0.0758343	0.109207	NA	0.519157	NA
hsa-miR-1178-5p	No	No	1.16183	0.615833	0	1.21215	0.924624	0.384724	-0.400206	-1.64066	-1.24046	0.316982	0.00215829	0.0142717	NA	0.0835149	NA
hsa-miR-1179	No	No	5.61961	3.65668	3.74841	5.61556	6.15944	4.16139	0.00946022	-0.474581	-0.484041	0.972363	0.153894	0.110049	0.992699	0.651245	0.506957
hsa-miR-1179-3p:Novel	No	No	2.14675	1.74018	2.15441	2.03591	1.86298	2.51586	-0.110153	0.13447	0.244623	0.659842	0.640041	0.344409	0.927188	0.954684	0.752109
hsa-miR-1180-3p	No	No	2.275	2.45827	2.36722	2.81233	3.05135	2.48111	0.116715	-0.183765	-0.30048	0.638958	0.543099	0.26853	0.924876	0.9204	0.695892
hsa-miR-1180-5p	No	No	0	0	0	0.525734	0.671254	0.937951	0.143906	0.480832	0.336926	0.757707	0.359118	0.463488	NA	NA	NA
hsa-miR-1181	No	Yes	11.5153	11.7347	10.879	14.9039	36.4848	14.589	1.25089	0.0435162	-1.20737	0.000329246	0.916921	0.0013144	0.0287025	0.994481	0.0381177
hsa-miR-1181-3p:Novel	No	Yes	4.12841	3.53179	2.459	5.0637	17.0011	3.1498	1.6098	-0.469504	-2.07931	0.00014424	0.366066	7.98249e-06	0.0165312	0.820912	0.00110485
hsa-miR-1182	No	No	5.16729	4.64932	5.51207	5.44299	5.58436	5.81602	0.0590927	0.0514946	-0.00759811	0.777179	0.835533	0.972855	0.951972	0.979381	0.997578
hsa-miR-1182-5p:Novel	No	No	5.88081	6.00074	6.22367	5.54363	6.1201	6.09397	0.0965265	0.258325	0.161799	0.587944	0.217173	0.385222	0.905798	0.717887	0.784842
hsa-miR-1183	No	No	3.06623	3.29687	3.28782	3.54739	3.4155	3.26955	-0.0742067	-0.0751704	-0.000963781	0.737835	0.776544	0.996797	0.94049	0.976845	0.998851
hsa-miR-1183-5p:Novel	No	No	7.86745	6.21524	5.31292	7.89654	7.85972	5.51693	0.0176131	-0.404714	-0.422327	0.927175	0.0875466	0.0499969	0.982695	0.539898	0.341855
hsa-miR-1185-3p	No	No	0.985213	0.699353	0	1.10336	0.860938	0.637989	-0.433263	-0.55998	-0.126717	0.224715	0.196366	0.755697	NA	0.694861	NA
hsa-miR-1185-5p	No	No	3.31386	2.09806	3.11183	3.28882	2.78509	3.20314	-0.235434	0.0545053	0.28994	0.341464	0.851174	0.274749	0.815768	0.982423	0.70024
hsa-miR-1193	No	No	2.20531	2.46333	2.15441	2.88489	3.27835	2.71697	0.157458	-0.12339	-0.280848	0.564578	0.70874	0.343888	0.898145	0.967389	0.752014
hsa-miR-1193-3p:Novel	No	No	1.41283	1.2422	0.681801	1.70927	1.28322	0.933356	-0.486722	-0.791853	-0.305131	0.0898994	0.0340481	0.389902	NA	0.401444	0.787517
hsa-miR-1197	No	No	6.66811	4.93273	5.51207	7.32389	5.44879	5.19873	-0.382494	-0.429419	-0.0469249	0.0471669	0.0646298	0.827453	0.420822	0.505032	0.974172
hsa-miR-1197-5p:Novel	No	No	5.14571	3.66704	2.6274	5.191	4.19602	3.42789	-0.312509	-0.430137	-0.117628	0.122115	0.0825617	0.608194	0.582759	0.532537	0.899442
hsa-miR-1199-3p	No	No	1.82932	1.85973	1.42643	2.17018	2.28063	1.68975	0.0678821	-0.379601	-0.447483	0.801471	0.264727	0.146404	0.956828	0.758028	0.565021
hsa-miR-1199-5p	No	No	1.53311	1.59592	1.3137	2.14885	2.82699	2.22652	0.402567	0.199387	-0.20318	0.267713	0.644631	0.596836	0.750957	0.956521	0.894425
hsa-miR-1200	No	No	3.38547	3.89426	4.61977	4.0774	4.26973	5.15783	0.114124	0.402773	0.288648	0.542174	0.0602423	0.125509	0.896518	0.5047	0.534566
hsa-miR-1200-3p:Novel	No	No	10.6284	11.8232	10.1635	12.7748	13.8481	14.1759	0.115656	0.0941472	-0.021509	0.547332	0.679513	0.916702	0.896518	0.962693	0.995573
hsa-miR-1202	No	No	1.92033	1.78874	1.77934	2.21457	2.12058	2.65897	-0.00177576	-0.00680186	-0.0050261	0.994582	0.98226	0.985407	0.998375	0.998523	0.99842
hsa-miR-1202-3p:Novel	No	No	2.275	2.19791	2.20483	3.11063	2.94845	2.10676	-0.142555	-0.577036	-0.434481	0.594639	0.0813688	0.15356	0.910333	0.53209	0.579335
hsa-miR-1203	No	No	2.20838	2.5932	2.13965	2.31775	2.66718	2.61831	0.207066	0.0539545	-0.153112	0.404199	0.854577	0.555934	0.845168	0.982423	0.880735
hsa-miR-1203-3p:Novel	No	No	14.6406	10.9199	12.4947	21.5185	17.4546	14.4423	-0.30112	-0.55378	-0.252659	0.215351	0.0571658	0.340997	0.701641	0.491408	0.751328
hsa-miR-1204	No	No	2.90458	2.14967	2.19188	3.13935	2.70128	2.77874	-0.255914	-0.166239	0.0896752	0.310725	0.575741	0.742457	0.786811	0.937454	0.944494
hsa-miR-1204-3p:Novel	No	No	8.87218	8.19889	4.94498	10.6769	10.5322	8.5312	-0.0431868	-0.231693	-0.188506	0.855655	0.416246	0.466565	0.970631	0.860194	0.836824
hsa-miR-1205	No	No	2.20838	2.25669	1.84421	2.19213	4.34298	3.30072	0.76053	0.76407	0.00354056	0.0466667	0.091626	0.992886	0.4191	0.547919	0.998791
hsa-miR-1205-3p:Novel	No	No	2.275	1.88397	1.6139	2.99463	2.13306	2.03023	-0.332599	-0.63112	-0.298521	0.231703	0.06531	0.348454	0.725975	0.505032	0.755675
hsa-miR-1206	No	No	6.61592	5.70473	6.66437	8.44121	7.90412	7.8135	-0.0905262	-0.0568013	0.033725	0.68782	0.831993	0.889719	0.929346	0.979381	0.990987
hsa-miR-1206-3p:Novel	No	Yes	0.640108	0.531973	0.869901	1.04442	0.822167	2.36456	-0.269737	1.39543	1.66517	0.572255	0.00745826	0.000386223	NA	0.180891	0.0186674
hsa-miR-1207-3p	No	No	0.640108	0.399663	0.491234	0.988468	0.746866	0.773146	-0.364554	-0.418354	-0.0538003	0.368486	0.390524	0.905344	NA	0.84372	NA
hsa-miR-1207-5p	No	No	1.69274	1.88397	1.6139	1.99944	2.61748	1.74813	0.300964	-0.246692	-0.547655	0.317455	0.509757	0.101304	0.793187	0.911072	0.491195
hsa-miR-1208	No	No	7.88171	6.07239	8.35361	9.23184	7.37226	10.076	-0.301401	0.172574	0.473974	0.160013	0.491798	0.0385711	0.642002	0.905807	0.303486
hsa-miR-1208-3p:Novel	No	No	1.10419	1.18177	1.10241	1.08627	1.81729	1.94444	0.667908	0.881597	0.213689	0.106263	0.0652651	0.602165	0.558701	0.505032	0.896298
hsa-miR-12113	No	No	3.38547	2.79741	3.30724	3.48635	3.48602	3.72322	0.0327001	0.277897	0.245197	0.887994	0.306521	0.31281	0.976637	0.779493	0.722522
hsa-miR-12113-3p:Novel	No	No	2.94041	2.45827	2.45617	3.19918	3.08597	3.08401	-0.0516549	-0.161453	-0.109798	0.825678	0.561467	0.663127	0.963474	0.930055	0.922712
hsa-miR-12114-3p:Novel	No	No	2.62876	1.92704	2.03738	2.84238	2.30889	2.68767	-0.271887	-0.114988	0.156899	0.251526	0.681786	0.542882	0.735254	0.962808	0.876034
hsa-miR-12115	No	No	4.30607	5.18639	4.77261	6.4628	8.16456	6.2801	0.303241	-0.0810285	-0.38427	0.279265	0.80939	0.204134	0.758226	0.977782	0.637798
hsa-miR-12115-3p:Novel	No	No	1.61836	1.27599	1.3137	1.71573	1.77431	1.63983	-0.0328693	-0.206032	-0.173163	0.906252	0.534097	0.563124	0.980254	0.9204	0.882053
hsa-miR-12116	No	No	3.92562	3.5042	2.86331	3.92349	3.75365	3.19058	-0.0421377	-0.162174	-0.120036	0.82649	0.488228	0.570786	0.963994	0.905433	0.883601
hsa-miR-12116-3p:Novel	No	No	1.82932	2.09545	2.6274	2.38732	2.6357	3.4575	0.106864	0.47584	0.368975	0.697852	0.131323	0.186999	0.93047	0.623977	0.62095
hsa-miR-12117	No	No	3.33405	2.33071	3.22781	3.73323	3.54039	2.99547	-0.137618	-0.365268	-0.22765	0.618427	0.27576	0.457611	0.916871	0.76656	0.831438
hsa-miR-12117-3p:Novel	No	No	1.28022	1.17726	1.55592	1.40844	1.09986	1.76851	-0.284528	0.142332	0.42686	0.35086	0.678569	0.173582	NA	0.962434	0.605803
hsa-miR-12118	No	No	7.04119	6.51932	7.7169	8.6045	8.22232	9.23264	-0.0836883	0.0457612	0.12945	0.602394	0.808267	0.448652	0.912068	0.977782	0.82447
hsa-miR-12118-3p:Novel	No	No	3.94085	4.12785	4.74238	4.69569	5.71747	4.5789	0.201673	-0.0422068	-0.24388	0.402723	0.884249	0.348868	0.845168	0.988923	0.755675
hsa-miR-12119	No	No	10.7338	11.2374	10.879	12.1003	12.3066	11.9567	-0.00566867	-0.0174102	-0.0117416	0.974288	0.933717	0.950618	0.99351	0.995339	0.997578
hsa-miR-12119-3p:Novel	No	No	3.54887	3.00037	2.78454	4.28248	4.81325	4.19245	0.128463	-0.140056	-0.268519	0.672065	0.699538	0.41283	0.929203	0.965995	0.809484
hsa-miR-12120	No	No	9.44594	8.90566	7.90396	10.8005	11.0059	10.6821	-0.00421177	0.107535	0.111747	0.986592	0.718484	0.679135	0.996572	0.967889	0.925021
hsa-miR-12120-3p:Novel	No	No	2.94041	1.88397	2.77186	4.0932	2.52303	3.87066	-0.690192	-0.300806	0.389386	0.015697	0.363343	0.208093	0.238692	0.818283	0.641989
hsa-miR-12121	No	Yes	2.20531	2.46636	2.19188	3.36184	6.71189	2.1499	0.91561	-0.612751	-1.52836	0.0293587	0.238964	0.00108453	0.325166	0.741063	0.0332914
hsa-miR-12121-3p:Novel	No	No	3.83842	4.1347	3.95599	3.93017	5.38406	4.2479	0.424802	0.13946	-0.285342	0.0942879	0.647212	0.291293	0.535746	0.956521	0.71244
hsa-miR-12122	No	Yes	4.8713	5.22054	5.2194	20.4722	7.8828	6.01931	-0.668492	-1.63275	-0.964261	0.071888	0.000274168	0.0187836	0.485889	0.0202511	0.205004
hsa-miR-12122-3p:Novel	No	No	3.53179	3.27769	3.43864	3.94186	3.70515	3.84456	-0.0747986	0.036852	0.111651	0.702107	0.872774	0.590702	0.930963	0.983309	0.891252
hsa-miR-12123-3p:Novel	No	No	2.79838	2.36148	1.97799	3.49765	2.82317	2.3916	-0.283636	-0.463595	-0.179958	0.29548	0.159943	0.554585	0.773071	0.656773	0.880735
hsa-miR-12124	No	No	6.89649	7.52383	7.88221	9.27138	7.97264	9.00175	-0.190848	0.0286555	0.219503	0.279032	0.890425	0.246919	0.758226	0.991492	0.68181
hsa-miR-12124-5p:Novel	No	No	4.41061	4.0005	4.42996	4.80067	4.73429	5.23627	-0.0473106	0.0553328	0.102643	0.816682	0.81633	0.633329	0.96284	0.977782	0.910854
hsa-miR-12125	No	No	1.74275	1.85973	1.55592	1.81244	2.17578	2.14497	0.123553	0.219292	0.0957387	0.667827	0.517087	0.750137	0.928477	0.916321	0.946254
hsa-miR-12125-5p:Novel	No	No	5.1179	5.59483	6.0893	6.88094	6.29454	7.11967	-0.108729	0.0531643	0.161893	0.585932	0.820945	0.447669	0.904849	0.977782	0.824155
hsa-miR-12126	No	No	4.85507	5.54932	5.07158	5.02126	6.66145	5.70388	0.381833	0.0315275	-0.350305	0.0668337	0.899223	0.112855	0.483561	0.991871	0.509855
hsa-miR-12126-5p:Novel	No	No	4.12841	4.57453	3.92987	4.92033	4.93118	3.94709	-0.0542743	-0.250102	-0.195828	0.764202	0.258983	0.330601	0.94895	0.755113	0.738768
hsa-miR-12127	No	No	1.97043	1.82834	1.55592	2.05846	3.71334	2.08841	0.651817	0.0999305	-0.551886	0.0804464	0.82685	0.171847	0.500134	0.977782	0.603547
hsa-miR-12127-5p:Novel	No	No	5.25752	5.61871	5.33149	6.14161	7.78692	6.8116	0.300042	0.156913	-0.143129	0.202472	0.576732	0.56945	0.689554	0.937519	0.883601
hsa-miR-12128	No	No	3.06623	3.4309	2.459	3.79828	5.36774	3.1643	0.423208	-0.372488	-0.795696	0.145609	0.297048	0.0131699	0.629181	0.773855	0.170649
hsa-miR-12128-5p:Novel	No	No	3.39235	3.10762	3.55867	3.71143	3.40754	3.89739	-0.0760521	0.0407764	0.116828	0.689664	0.854163	0.558303	0.929346	0.982423	0.880845
hsa-miR-12129	No	No	1.72243	1.3982	1.84791	1.86001	1.88994	2.23089	-0.048804	0.357822	0.406626	0.869722	0.298716	0.186977	0.976253	0.773855	0.62095
hsa-miR-12129-5p:Novel	No	No	4.92607	3.63917	4.8827	7.74708	7.24031	7.42089	-0.0938847	-0.277009	-0.183124	0.795711	0.519647	0.639367	0.956828	0.916942	0.911432
hsa-miR-12130	No	No	2.95564	3.18042	2.33388	4.02973	4.23861	3.2781	-0.0621563	-0.204724	-0.142568	0.814527	0.525532	0.626922	0.96239	0.916964	0.908604
hsa-miR-12130-5p:Novel	No	No	6.89649	6.56018	6.85332	7.8093	7.27418	7.45088	-0.0889732	-0.0972779	-0.0083047	0.62911	0.656473	0.966675	0.924781	0.957665	0.997578
hsa-miR-12131-5p:Novel	No	No	5.88081	7.0906	7.37701	6.93621	7.86524	7.4167	0.169549	0.126273	-0.0432758	0.400119	0.598119	0.840414	0.844676	0.943798	0.977743
hsa-miR-12132	No	No	5.07821	5.51207	5.01079	9.24545	10.8376	6.37198	0.0858059	-0.477385	-0.563191	0.789667	0.218805	0.109955	0.955746	0.718612	0.506957
hsa-miR-12132-5p:Novel	No	No	6.86606	6.96072	7.11735	7.81736	7.66142	6.92413	-0.0373447	-0.134964	-0.0976198	0.862978	0.602869	0.678482	0.973806	0.943798	0.925021
hsa-miR-12133	No	No	1.12392	0.899229	0.965985	1.27467	1.11099	1.07212	-0.123811	-0.387222	-0.263411	0.700114	0.330426	0.469337	NA	0.79665	0.838698
hsa-miR-12133-5p:Novel	No	No	2.58364	2.69769	2.6274	2.57098	3.11057	3.96931	0.190648	0.664685	0.474037	0.447446	0.018965	0.0556866	0.860381	0.308181	0.363875
hsa-miR-12135	No	No	3.83842	3.28009	3.9411	6.88336	5.30005	4.70416	-0.308471	-0.545192	-0.236721	0.331379	0.152949	0.4977	0.808154	0.651245	0.85339
hsa-miR-12135-5p:Novel	No	No	3.9842	3.53179	4.15779	4.69428	3.83928	5.34404	-0.379854	0.0767688	0.456622	0.0795228	0.757928	0.0465867	0.497915	0.975105	0.331569
hsa-miR-122-3p	No	No	0.640108	0	0	0.689772	0.638652	0.645383	0.153816	-0.0179917	-0.171808	0.77613	0.977762	0.766077	NA	NA	NA
hsa-miR-122-5p	No	Yes	6.18064	8.09311	9.83601	7.09903	13.528	11.1497	0.970341	0.676024	-0.294317	0.000613062	0.0441224	0.32386	0.0352047	0.448759	0.730296
hsa-miR-1224-3p	No	No	0.697309	0.813281	0	1.18225	1.02443	0.688064	-0.247109	-0.909242	-0.662132	0.500486	0.0523721	0.129667	NA	0.466983	NA
hsa-miR-1224-5p	No	No	1.21782	1.26634	1.42643	1.31337	1.28715	1.89174	0.017118	0.52902	0.511902	0.958663	0.155878	0.119393	NA	0.653682	0.525753
hsa-miR-1225-3p	No	No	1.41283	2.06735	1.97799	2.05002	2.31751	1.99863	0.163882	-0.221345	-0.385227	0.555458	0.511041	0.201417	0.897021	0.911072	0.635905
hsa-miR-1225-5p	No	No	0	0	0	0.18866	0.346521	0.248955	0.526366	0.27425	-0.252117	0.337923	0.675469	0.666931	NA	NA	NA
hsa-miR-1226-3p	No	No	0	0	0	0.596437	0.419573	0.543037	-0.379508	-0.0776801	0.301828	0.433432	0.891436	0.558431	NA	NA	NA
hsa-miR-1226-5p	No	No	1.51834	1.82834	2.49894	2.06005	2.76142	2.95859	0.472854	0.668595	0.19574	0.178011	0.102636	0.58592	0.666748	0.57155	0.890372
hsa-miR-1227-3p	No	No	0	0	0	0.275031	0.131199	0.399115	-0.402131	0.626963	1.02909	0.530387	0.399971	0.124238	NA	NA	NA
hsa-miR-1227-5p	No	No	0.882948	0.642346	0.715827	1.67384	1.37654	0.744903	-0.335686	-1.0628	-0.727119	0.443851	0.0585007	0.163564	NA	0.497715	0.595755
hsa-miR-1228-3p	No	No	0	0	0	0.293874	0.303321	0.348701	-0.0792332	0.163641	0.242874	0.889879	0.807397	0.687094	NA	NA	NA
hsa-miR-1228-5p	No	No	0.882948	1.88397	1.55592	1.40356	2.52959	1.80832	0.924885	0.439801	-0.485084	0.0118795	0.315932	0.196374	0.2043	0.78983	0.630758
hsa-miR-1229-3p	No	No	3.12093	2.19791	1.22068	3.18347	2.51001	2.12017	-0.312664	-0.47104	-0.158376	0.284513	0.184818	0.629265	0.761397	0.683343	0.90915
hsa-miR-122b-3p	No	No	4.60033	3.03619	4.918	5.34313	3.89246	4.87351	-0.432558	-0.116982	0.315576	0.0748416	0.680785	0.229015	0.493206	0.962808	0.661455
hsa-miR-122b-5p	No	No	2.14675	1.18177	1.39227	2.32465	1.36385	1.93067	-0.741247	-0.179592	0.561655	0.0175128	0.617993	0.100245	0.253647	0.94684	0.489176
hsa-miR-1231	No	No	4.19756	4.04655	4.17681	5.16415	4.41744	4.05158	-0.282702	-0.348716	-0.066014	0.161702	0.151997	0.768832	0.642311	0.651245	0.954769
hsa-miR-1231-3p:Novel	No	No	4.49568	3.88979	4.38377	5.28873	4.7318	4.16991	-0.196234	-0.315795	-0.119561	0.32785	0.192166	0.590573	0.805416	0.691568	0.891252
hsa-miR-1233-3p	No	No	1.72243	2.04972	1.42643	2.31095	2.88038	2.72565	0.302585	0.158609	-0.143975	0.340165	0.673385	0.666998	0.815768	0.961555	0.922712
hsa-miR-1233-5p	No	No	2.79838	3.5042	4.56888	3.2309	4.91848	4.3638	0.475004	0.421803	-0.0532018	0.0690936	0.172516	0.844665	0.483561	0.672216	0.978757
hsa-miR-1234-3p	No	No	0	0	0	0.563771	0.884185	0.50589	0.480979	0.0636056	-0.417373	0.319183	0.913207	0.412899	NA	NA	NA
hsa-miR-1234-5p:Novel	No	No	3.03668	2.7964	2.66575	2.79326	3.73584	3.35801	0.405991	0.300818	-0.105172	0.0865555	0.283245	0.66634	0.513875	0.772269	0.922712
hsa-miR-1236-3p	No	No	0	0.616591	0.461977	0.402031	0.820084	0.665851	0.669863	0.397199	-0.272664	0.124274	0.440901	0.528768	NA	NA	NA
hsa-miR-1236-5p	No	No	7.75093	9.09792	9.76541	9.91679	10.7923	10.798	0.106889	0.124293	0.0174044	0.64496	0.651829	0.944212	0.924881	0.95687	0.997578
hsa-miR-1237-5p	No	No	3.65347	4.13406	4.66775	4.70639	5.39866	8.49216	0.148723	0.899027	0.750304	0.613538	0.00862819	0.0143046	0.916871	0.200297	0.173536
hsa-miR-1238-3p	No	No	0.985213	1.14363	0.777959	1.00614	1.47618	1.0658	0.412097	-0.151748	-0.563845	0.237057	0.723683	0.132699	NA	0.967889	0.542375
hsa-miR-1238-5p	No	No	1.72243	1.25372	1.39227	2.89398	1.69002	2.2043	-0.798168	-0.130043	0.668125	0.0212614	0.747356	0.0784632	0.277948	0.9729	0.434173
hsa-miR-124-3p	No	No	3.83842	4.49615	3.88979	4.82646	7.92576	4.28954	0.625193	-0.128318	-0.753511	0.0394276	0.72793	0.0224466	0.3821	0.970182	0.225082
hsa-miR-124-5p	No	No	7.88628	7.31336	8.06952	8.07376	10.9873	9.38623	0.415516	0.256697	-0.158819	0.0536629	0.317288	0.488177	0.440671	0.790135	0.84709
hsa-miR-1243	No	No	3.94085	4.13666	3.42666	4.21324	4.65299	4.35668	0.156688	0.036664	-0.120024	0.40939	0.871038	0.549719	0.845168	0.983309	0.880141
hsa-miR-1243-3p:Novel	No	No	1.82932	1.8729	2.03738	2.11284	2.26321	2.19882	0.104591	0.024019	-0.0805718	0.697632	0.940218	0.778034	0.93047	0.997645	0.957514
hsa-miR-1244	No	No	2.275	2.06392	1.7398	2.63293	2.37415	2.34457	-0.28989	-0.0851062	0.204784	0.300607	0.798395	0.50359	0.778388	0.977782	0.857145
hsa-miR-1244-5p:Novel	No	No	3.83279	3.59692	3.55084	4.01901	4.15377	3.84881	0.00642345	-0.0481419	-0.0545653	0.973189	0.833084	0.790604	0.993157	0.979381	0.962027
hsa-miR-1245a	No	No	0	0	0	0.34416	0.569443	0.271239	0.285314	-0.325377	-0.610692	0.589021	0.611268	0.285076	NA	NA	NA
hsa-miR-1245a-5p:Novel	No	No	4.4454	4.04655	4.15779	5.1202	4.81791	4.3896	-0.08187	-0.187226	-0.105356	0.697595	0.460607	0.648167	0.93047	0.888311	0.916803
hsa-miR-1245b-3p	No	No	0.457329	0.199831	0.681801	1.01707	0.914495	0.901894	-0.26092	-0.0299077	0.231012	0.553361	0.954426	0.629459	NA	0.997645	NA
hsa-miR-1245b-5p	No	No	0.914658	0	0.461052	0.934039	0.75631	0.679449	-0.355607	-0.384691	-0.0290834	0.389278	0.435824	0.949286	NA	0.87835	NA
hsa-miR-1246-3p:Novel	No	No	2.20838	1.3982	1.77934	2.34268	2.2191	2.31314	-0.090446	0.0209074	0.111353	0.771482	0.954391	0.736941	0.950985	0.997645	0.942723
hsa-miR-1247-3p	No	No	2.90458	2.55199	2.14748	3.62151	2.86517	2.36282	-0.296208	-0.643296	-0.347087	0.205162	0.0276554	0.201201	0.692008	0.362561	0.635905
hsa-miR-1247-5p	No	No	2.20838	1.5181	1.6139	2.54668	1.77887	2.19102	-0.597794	-0.473334	0.12446	0.0253566	0.134001	0.677755	0.305206	0.62756	0.925021
hsa-miR-1248	No	No	4.60033	4.1909	4.17681	6.22759	5.3691	4.244	-0.154689	-0.585485	-0.430795	0.465257	0.0238054	0.0702044	0.867758	0.340826	0.412688
hsa-miR-1248-3p:Novel	No	No	4.41676	5.10397	5.53746	5.5666	5.03896	5.29971	-0.147809	-0.120736	0.027073	0.425898	0.583586	0.89277	0.848571	0.939678	0.990987
hsa-miR-1249-3p	No	No	2.79838	2.48441	2.21498	3.26578	3.09177	3.23976	-0.124055	-0.0501042	0.0739503	0.632128	0.870048	0.790649	0.924781	0.983309	0.962027
hsa-miR-1249-5p	No	No	0	1.06395	0.777959	0.778877	1.27836	1.17052	0.656135	0.313018	-0.343118	0.0897852	0.491515	0.37198	NA	0.905807	0.776871
hsa-miR-1250-3p	No	No	0	0	0	0.489816	0.696888	0.467438	0.397334	-0.352958	-0.750292	0.3975	0.540299	0.138611	NA	NA	NA
hsa-miR-1250-5p	No	No	8.95632	9.63165	6.56851	13.0988	11.8588	7.35469	-0.155657	-0.805203	-0.649546	0.458444	0.00178665	0.00591974	0.865268	0.0754106	0.10184
hsa-miR-1251-3p	No	No	3.83842	2.12789	2.03738	3.97461	3.17105	2.47538	-0.279476	-0.665151	-0.385675	0.378248	0.0860177	0.27937	0.830884	0.539358	0.702384
hsa-miR-1251-5p	No	No	0	0	0.491234	0.595103	0.458493	0.605533	-0.397641	0.0350672	0.432708	0.387174	0.947597	0.371695	NA	NA	NA
hsa-miR-1252-3p	No	No	6.4052	7.06359	6.66437	9.28898	7.93479	9.30548	-0.252737	0.0763783	0.329116	0.293512	0.788403	0.204317	0.772828	0.97765	0.637798
hsa-miR-1252-5p	No	No	5.88843	6.37996	4.99251	7.1908	6.69317	6.23859	-0.0916252	-0.121561	-0.0299355	0.665744	0.631338	0.896609	0.927188	0.951251	0.992524
hsa-miR-1253-3p:Novel	No	No	2.32366	3.03619	2.66575	2.98529	3.38276	3.26776	0.0416734	0.062462	0.0207887	0.855438	0.816978	0.931489	0.970631	0.977782	0.995942
hsa-miR-1255a	No	No	13.7321	11.8273	13.2253	14.8271	13.0495	14.9622	-0.18236	0.0649883	0.247348	0.288398	0.748946	0.180681	0.768673	0.9729	0.614719
hsa-miR-1255a-3p:Novel	No	Yes	8.08612	6.56018	8.90097	8.9067	9.84274	18.1306	0.0946126	1.12893	1.03431	0.73225	0.000466943	0.000366338	0.939937	0.0316159	0.0179919
hsa-miR-1255b-1-3p:Novel	No	No	2.79838	2.06392	2.19188	3.61917	2.51346	2.27378	-0.478221	-0.529622	-0.0514011	0.0327954	0.0527321	0.841622	0.343051	0.466983	0.977771
hsa-miR-1255b-2-3p	No	No	0	0	0.591806	0.574798	0.425052	0.848997	-0.202807	0.516661	0.719468	0.678909	0.348545	0.143151	NA	NA	NA
hsa-miR-1255b-5p	No	No	2.75227	3.21173	3.92987	3.65338	3.76613	3.95889	0.00450229	0.109931	0.105429	0.984806	0.692662	0.673751	0.996572	0.962808	0.925021
hsa-miR-1256	No	No	7.09774	7.23572	9.2718	8.27974	8.49585	9.17241	0.0519093	0.101686	0.0497768	0.756688	0.606091	0.779007	0.945993	0.944254	0.957514
hsa-miR-1256-3p:Novel	No	No	2.275	2.59781	2.15441	3.0889	3.40703	2.6937	0.115736	-0.239541	-0.355277	0.658111	0.452554	0.216943	0.927188	0.881341	0.650753
hsa-miR-1257	No	No	4.64732	5.84139	5.44571	5.78567	6.16369	6.02497	0.079226	0.144316	0.0650903	0.626582	0.450642	0.702257	0.923236	0.880567	0.933113
hsa-miR-1257-3p:Novel	No	No	2.275	1.7552	2.44135	2.8483	2.70807	2.63308	-0.116122	-0.115025	0.00109749	0.670974	0.722621	0.997031	0.929203	0.967889	0.998851
hsa-miR-1258	No	No	0.882948	0.523862	0.988996	0.974488	0.916636	1.11878	0.0377111	0.20093	0.163219	0.921295	0.654635	0.683339	NA	0.957069	NA
hsa-miR-1258-5p:Novel	No	No	1.97043	1.82852	2.28444	1.84318	2.27023	2.57529	0.208229	0.631842	0.423613	0.439086	0.0390515	0.110588	0.856872	0.419469	0.507137
hsa-miR-125a-3p	No	No	1.39462	1.82834	1.58079	1.85662	2.51068	1.67823	0.413942	-0.127057	-0.540999	0.157687	0.72578	0.0904861	0.641017	0.969098	0.462748
hsa-miR-125a-5p	No	No	4.19756	4.70906	2.94741	15.5146	10.0283	8.53034	-0.528649	-1.33075	-0.802104	0.170343	0.00407411	0.0579603	0.654623	0.121055	0.369183
hsa-miR-125b-1-3p	No	No	0.735102	1.063	0.922105	0.898122	1.30251	1.00289	0.508374	0.0871692	-0.421204	0.139556	0.835485	0.239357	NA	0.979381	0.672983
hsa-miR-125b-2-3p	No	No	3.2013	4.13406	4.8827	3.75126	3.87334	5.01441	0.121207	0.426611	0.305403	0.573757	0.0857883	0.164308	0.900797	0.539358	0.595913
hsa-miR-125b-5p	No	Yes	7.72934	7.9796	7.37684	13.1295	18.2996	10.2479	0.580271	-0.551602	-1.13187	0.0662957	0.146467	0.000987833	0.483561	0.640049	0.0316627
hsa-miR-126-3p	No	Yes	1.65693	1.39214	1.84421	5.6868	2.1692	2.26176	-1.29084	-1.34335	-0.0525111	0.000675078	0.00342268	0.903358	0.0357407	0.112361	0.993228
hsa-miR-126-5p	No	No	1.37614	1.23167	0.965985	1.53636	1.51288	1.45374	0.0618288	0.118634	0.0568057	0.832422	0.731841	0.853305	NA	0.970182	0.981448
hsa-miR-1260a	No	No	6.89902	5.70473	5.51207	7.81314	12.7696	6.01281	0.62912	-0.360718	-0.989838	0.0341673	0.317513	0.00232166	0.349089	0.790135	0.0552301
hsa-miR-1260a-3p:Novel	No	No	8.83353	7.65354	5.33801	12.154	20.9237	16.6555	0.704962	0.526393	-0.178569	0.0773547	0.26746	0.676684	0.497915	0.75983	0.925021
hsa-miR-1260b	No	No	9.81406	10.6359	7.83789	12.3828	10.9989	9.19862	-0.161184	-0.43258	-0.271396	0.418099	0.0712794	0.215215	0.845168	0.51256	0.650753
hsa-miR-1260b-3p:Novel	No	No	4.14233	3.57748	4.15779	4.78952	4.26778	5.29444	-0.186137	0.0653998	0.251537	0.357539	0.780098	0.238305	0.820174	0.976845	0.672053
hsa-miR-1261	No	No	12.1992	12.7599	13.7066	14.1153	13.2619	14.7927	-0.0942927	0.0179717	0.112264	0.556471	0.924263	0.512984	0.897021	0.994483	0.860479
hsa-miR-1261-3p:Novel	No	No	4.8713	4.4055	4.66506	5.54131	5.90588	5.15717	0.0196044	-0.0452369	-0.0648413	0.926813	0.859814	0.779407	0.982695	0.982423	0.957514
hsa-miR-1262-3p:Novel	No	No	1.77444	1.84977	2.20483	2.32769	2.86236	2.53051	0.228539	0.188737	-0.0398016	0.450512	0.600805	0.901233	0.860865	0.943798	0.993228
hsa-miR-1263	No	No	1.74275	1.8475	1.4737	1.98221	1.95606	2.0187	-0.0510526	-0.123546	-0.0724937	0.855182	0.710242	0.809712	0.970631	0.967389	0.971096
hsa-miR-1263-3p:Novel	No	No	1.32807	1.23167	0.715827	1.68075	1.43104	1.15309	-0.208322	-0.456483	-0.248162	0.513846	0.240683	0.48913	NA	0.741439	0.847174
hsa-miR-1264	No	No	1.21782	1.94713	1.96494	2.15587	2.22446	2.10533	0.103316	0.206263	0.102947	0.700341	0.517429	0.715931	0.930963	0.916428	0.935118
hsa-miR-1264-5p:Novel	No	No	4.4454	3.28009	3.4796	5.21215	3.74942	4.71707	-0.437448	0.012047	0.449495	0.0955066	0.968734	0.112133	0.536792	0.997645	0.509757
hsa-miR-1265	No	No	2.94041	2.846	3.9411	3.35897	3.35844	3.67899	0.0189192	0.233357	0.214438	0.932512	0.370851	0.357538	0.984028	0.822797	0.762397
hsa-miR-1265-3p:Novel	No	No	3.31257	2.75817	2.77186	3.35536	3.10299	2.76642	-0.147542	-0.141735	0.00580678	0.501549	0.59065	0.980719	0.878461	0.941911	0.998364
hsa-miR-1266-3p	No	No	2.13507	1.59592	2.36722	2.52414	2.14075	2.44778	-0.226832	0.0473559	0.274188	0.453436	0.89426	0.399398	0.860865	0.991492	0.798011
hsa-miR-1267	No	No	5.55675	5.37417	7.11735	8.15644	6.21148	6.73235	-0.41849	-0.342159	0.0763305	0.0832767	0.234072	0.772767	0.503619	0.733751	0.957514
hsa-miR-1268b	No	No	6.62514	8.54595	7.37701	8.55775	9.93132	8.98526	0.224488	-0.0416756	-0.266164	0.252741	0.858718	0.205937	0.735254	0.982423	0.637923
hsa-miR-1268b-3p:Novel	No	No	0.735102	1.30385	0.988996	0.914106	1.80496	1.37757	0.974669	0.562063	-0.412606	0.0096608	0.20658	0.263555	NA	0.705679	0.692774
hsa-miR-1269a	No	No	3.41251	2.51615	2.20483	3.0553	3.60133	2.67821	0.243052	-0.183191	-0.426243	0.357248	0.569245	0.139455	0.820174	0.932191	0.550729
hsa-miR-1269a-5p:Novel	No	No	4.72297	5.48502	4.17681	5.02982	5.24804	5.11604	-0.0125986	0.0716845	0.0842831	0.947806	0.754378	0.683057	0.987649	0.975105	0.926479
hsa-miR-1269b	No	No	8.39513	7.49161	8.14954	9.34685	9.41424	8.61436	0.0401867	-0.118169	-0.158356	0.84319	0.626705	0.471637	0.968474	0.9503	0.838698
hsa-miR-1269b-3p:Novel	No	No	1.10419	1.37595	1.18361	1.49255	1.69157	1.47909	0.137817	0.182568	0.0447507	0.681492	0.648536	0.900022	0.929346	0.956521	0.993228
hsa-miR-127-3p	No	No	5.61961	4.81582	3.88979	5.99857	6.44099	4.44936	0.120809	-0.40018	-0.520989	0.635241	0.197309	0.0641349	0.924781	0.69641	0.389025
hsa-miR-127-5p	No	No	1.87256	2.7519	2.49894	2.21386	2.88265	3.7546	0.438907	0.507138	0.0682307	0.081916	0.0775956	0.781518	0.501393	0.526484	0.957643
hsa-miR-1270	No	No	5.88843	6.15833	6.10338	6.50462	7.26856	6.27468	0.0982207	-0.0474643	-0.145685	0.553509	0.811217	0.413868	0.897021	0.977782	0.809484
hsa-miR-1270-3p:Novel	No	No	9.06502	8.18813	7.91197	11.1309	11.2421	8.73566	-0.0190726	-0.292661	-0.273589	0.930126	0.2635	0.24997	0.98293	0.757417	0.684439
hsa-miR-1271-3p	No	No	3.31257	2.5932	2.49894	3.91991	3.33118	3.4819	-0.266187	-0.0296484	0.236539	0.320699	0.925625	0.415913	0.796278	0.994681	0.811387
hsa-miR-1271-5p	No	No	0.580915	1.01164	0.482992	0.746228	1.43031	0.830038	0.851817	0.315553	-0.536263	0.0407558	0.537933	0.217131	NA	0.9204	0.650753
hsa-miR-1272	No	No	7.77946	6.50625	6.50987	8.51223	7.7467	8.29667	-0.149359	0.0344142	0.183773	0.381101	0.863837	0.31405	0.833678	0.983221	0.722522
hsa-miR-1273c	No	No	7.35102	7.56772	5.53263	10.8764	8.8138	6.93967	-0.248542	-0.553005	-0.304463	0.25366	0.0363315	0.208564	0.735254	0.411745	0.642791
hsa-miR-1273h-3p	No	No	3.20054	2.53268	2.85286	3.31249	3.12262	3.79328	0.00282467	-0.000608915	-0.00343359	0.990424	0.998231	0.988917	0.996572	0.999681	0.99842
hsa-miR-1275	No	No	4.74929	4.89547	4.8827	4.95468	5.8544	6.72365	0.291997	0.329359	0.0373621	0.133498	0.145802	0.851277	0.608708	0.640049	0.981114
hsa-miR-1275-3p:Novel	No	No	1.12392	0	0	1.07771	0.791124	0.649584	-0.23417	-0.618606	-0.384435	0.594032	0.254719	0.443281	NA	0.749331	NA
hsa-miR-1276	No	No	5.3659	5.57918	4.38377	5.85056	6.3637	5.84509	0.111013	0.0200529	-0.0909598	0.554928	0.928573	0.650318	0.897021	0.994681	0.917723
hsa-miR-1276-3p:Novel	No	No	3.23672	3.07916	2.28444	3.83956	3.18989	3.03684	-0.200927	-0.326873	-0.125946	0.393865	0.248008	0.627854	0.843465	0.746393	0.909089
hsa-miR-1277-3p	No	No	11.5985	10.1164	10.7374	15.4678	16.0009	11.9722	-0.0852832	-0.23883	-0.153547	0.766913	0.487862	0.623301	0.950075	0.905433	0.906809
hsa-miR-1277-5p	No	No	0.457329	0	0	0.84021	0.583002	0.435913	-0.425007	-0.65031	-0.225304	0.333996	0.22952	0.654596	NA	NA	NA
hsa-miR-1278	No	No	2.09193	1.7552	2.28444	2.47932	2.21535	2.51819	-0.233683	-0.0958588	0.137824	0.42901	0.782947	0.665394	0.849639	0.97718	0.922712
hsa-miR-1278-5p:Novel	No	No	3.83842	4.54896	4.09081	5.80956	5.47726	4.72794	-0.136142	-0.176661	-0.0405193	0.59485	0.565977	0.885112	0.910333	0.932191	0.990987
hsa-miR-1279	No	No	2.55895	2.51615	1.97799	2.35183	3.52938	2.60993	0.563935	0.322253	-0.241682	0.0472546	0.345496	0.416911	0.420822	0.806301	0.811698
hsa-miR-1279-3p:Novel	No	No	3.94085	3.48036	2.6274	5.03552	3.7947	3.65247	-0.42078	-0.471166	-0.0503866	0.0793231	0.104548	0.851588	0.497915	0.57688	0.981114
hsa-miR-128-1-5p	No	No	4.06641	4.13406	5.56908	6.51334	5.15265	7.9279	-0.436813	0.361307	0.798119	0.101531	0.246014	0.00512157	0.5497	0.744276	0.0956759
hsa-miR-128-2-5p	No	No	1.41283	1.79846	1.22068	1.59753	1.9922	1.98102	0.312529	0.279039	-0.0334897	0.299351	0.436629	0.914916	0.777427	0.87835	0.995132
hsa-miR-1281	No	No	1.53311	1.82834	1.77542	1.67095	2.11495	1.88549	0.287204	0.101895	-0.18531	0.348345	0.778323	0.561498	0.815768	0.976845	0.882053
hsa-miR-1281-5p:Novel	No	No	2.55895	2.00025	1.96494	2.53955	2.49905	2.43751	-0.144119	-0.136619	0.00750067	0.637536	0.706935	0.981938	0.924781	0.966559	0.99842
hsa-miR-1282	No	No	7.06359	6.29039	6.87728	7.29357	6.45514	6.8716	-0.154024	-0.0309657	0.123059	0.334637	0.869615	0.473703	0.811159	0.983309	0.838698
hsa-miR-1282-3p:Novel	No	No	1.41283	3.03492	2.96699	2.11489	3.17103	3.0662	0.495472	0.436137	-0.0593348	0.0526235	0.143842	0.816741	0.435511	0.638638	0.971096
hsa-miR-1283	No	No	4.41474	5.18639	4.07477	5.8002	5.87242	4.67315	0.0723925	-0.1797	-0.252093	0.76759	0.543402	0.346239	0.950075	0.9204	0.752532
hsa-miR-1283-1-3p:Novel	No	No	0.624187	0	0.482992	0.798799	0.802098	0.805913	-0.00624174	-0.14657	-0.140329	0.987691	0.761256	0.746119	NA	0.975745	NA
hsa-miR-1283-2-3p:Novel	No	No	1.77444	2.12599	1.77934	2.68641	2.50868	2.01352	-0.0621399	-0.432076	-0.369936	0.836385	0.244545	0.275309	0.96623	0.743719	0.700503
hsa-miR-1284	No	No	3.38547	2.846	3.11183	3.25439	3.4654	4.35005	0.153849	0.375541	0.221692	0.546321	0.206474	0.401291	0.896518	0.705679	0.79917
hsa-miR-1284-3p:Novel	No	No	7.77946	8.70089	10.676	10.5346	10.251	12.9699	-0.0592009	0.394968	0.454169	0.801934	0.155334	0.0709522	0.956948	0.653297	0.413888
hsa-miR-1286	No	No	11.375	8.1775	10.227	14.097	11.4479	15.8463	-0.346573	0.313326	0.659899	0.16204	0.284098	0.0132273	0.642311	0.773855	0.170666
hsa-miR-1286-5p:Novel	No	No	5.88081	5.45875	5.54372	6.91127	6.03077	6.01143	-0.227438	-0.268509	-0.0410706	0.191637	0.197889	0.830212	0.680975	0.69641	0.974172
hsa-miR-1287-3p	No	No	1.24837	1.19899	1.10241	1.82161	1.51962	1.21571	-0.326085	-0.576715	-0.250629	0.295412	0.131159	0.481476	NA	0.623977	0.843027
hsa-miR-1287-5p	No	No	6.47343	5.59528	5.7111	9.85854	7.65819	7.05293	-0.34438	-0.539113	-0.194733	0.157823	0.065296	0.467742	0.641017	0.505032	0.836824
hsa-miR-1288-3p	No	No	4.85507	5.31498	4.84171	6.05351	5.74489	5.47066	-0.135527	-0.130408	0.00511943	0.50529	0.59252	0.981609	0.881221	0.94256	0.99842
hsa-miR-1288-5p	No	No	7.88171	8.00543	10.7721	9.0051	9.07008	9.28192	-0.0225003	0.0479849	0.0704852	0.89665	0.815065	0.70403	0.976637	0.977782	0.933113
hsa-miR-1289	No	No	9.71015	9.79174	12.0554	14.084	14.6108	14.4896	0.0460364	0.0393563	-0.00668011	0.845822	0.88876	0.97908	0.968965	0.991239	0.998204
hsa-miR-1289-1-5p:Novel	No	No	9.06502	8.42806	8.86341	9.41616	8.50681	9.60077	-0.137259	0.100577	0.237836	0.392521	0.593383	0.164396	0.843465	0.943029	0.595913
hsa-miR-1289-2-5p:Novel	No	Yes	9.71243	8.02378	9.56891	15.0184	9.90677	16.7484	-0.624608	0.339762	0.96437	0.0137736	0.253252	0.000393562	0.225511	0.748683	0.0187249
hsa-miR-129-3p	No	No	0	1.01164	0.461052	0.555809	1.82064	0.781019	1.55794	0.739743	-0.818195	0.00309587	0.243601	0.12253	NA	0.743719	0.530733
hsa-miR-1290-5p:Novel	No	No	11.1958	8.00099	8.76753	10.5284	10.0099	9.03882	-0.0649928	-0.230447	-0.165455	0.720298	0.290315	0.403948	0.935784	0.773855	0.80184
hsa-miR-1291	No	No	9.63295	9.59191	10.7721	11.8617	15.6927	11.7015	0.410993	-0.0673327	-0.478326	0.0982365	0.821047	0.0746007	0.541739	0.977782	0.423804
hsa-miR-1291-3p:Novel	No	No	4.57329	4.25198	4.14947	4.72413	4.44174	4.29082	-0.0874776	-0.0196233	0.0678543	0.615474	0.924393	0.716463	0.916871	0.994483	0.935118
hsa-miR-1292-3p	No	No	0	0	0	0.484914	0.532562	0.431956	0.240702	0.0672129	-0.173489	0.647032	0.91445	0.755286	NA	NA	NA
hsa-miR-1292-5p	No	No	1.41283	1.85973	1.6139	2.02696	2.14403	2.53376	0.0808247	0.248158	0.167334	0.79663	0.497288	0.608607	0.956828	0.909368	0.899615
hsa-miR-1293	No	No	4.06641	3.65705	4.14947	4.68233	4.28195	4.21131	-0.0759846	-0.12897	-0.0529849	0.710386	0.597685	0.811296	0.935784	0.943798	0.971096
hsa-miR-1293-3p:Novel	No	No	0.985213	0.899229	0.461052	2.86121	1.16586	0.837051	-1.17458	-1.67233	-0.497747	0.00539647	0.00157799	0.327132	0.137493	0.0706911	0.734953
hsa-miR-1294	No	No	8.95632	8.63227	8.85993	10.9074	10.0379	11.0881	-0.150512	0.100163	0.250675	0.394534	0.631145	0.186178	0.843465	0.951251	0.620252
hsa-miR-1295a	No	No	1.35694	1.063	0.923954	1.52535	1.69872	1.483	0.116496	0.0744866	-0.0420092	0.769258	0.876283	0.92211	0.95028	0.985342	0.995573
hsa-miR-1295a-5p:Novel	No	No	2.55895	3.4309	3.22781	2.82059	3.84154	3.16189	0.453845	0.216253	-0.237592	0.0791713	0.482939	0.380167	0.497915	0.90233	0.784842
hsa-miR-1295b-3p	No	No	2.13507	2.59781	2.85286	2.53441	3.20561	2.87843	0.360334	0.255038	-0.105296	0.206342	0.450562	0.724397	0.692008	0.880567	0.939033
hsa-miR-1295b-5p	No	No	0.624187	0	0	0.648971	1.0291	0.922727	0.592938	0.618761	0.0258235	0.31319	0.376033	0.96649	NA	0.825209	NA
hsa-miR-1296-3p	No	No	1.32807	1.62656	1.3137	1.19322	1.6856	1.52167	0.306451	0.309299	0.00284725	0.298524	0.376305	0.992442	NA	0.825209	0.998791
hsa-miR-1296-5p	No	No	0	0.609508	0.491234	0.707311	0.994248	1.15608	0.609993	0.698684	0.0886904	0.192946	0.195033	0.847097	NA	0.69454	NA
hsa-miR-1297	No	No	2.65614	2.43803	1.55592	3.24427	2.5865	1.92186	-0.332623	-0.537199	-0.204576	0.162038	0.0681519	0.455349	0.642311	0.509346	0.8291
hsa-miR-1297-5p:Novel	No	No	3.74512	3.10762	4.14264	3.99884	3.79997	4.48401	-0.184701	0.242472	0.427173	0.426539	0.370508	0.0823552	0.848571	0.822797	0.444198
hsa-miR-1298-3p	No	No	2.78924	3.18042	2.66575	3.33085	3.42108	3.11704	0.0686421	-0.1274	-0.196042	0.74744	0.620058	0.395288	0.942462	0.948264	0.791407
hsa-miR-1298-5p	No	No	1.39462	1.27599	1.97799	1.90181	2.40887	2.45064	0.277679	0.546336	0.268657	0.5031	0.26511	0.538271	0.880009	0.758368	0.873023
hsa-miR-1299	No	No	10.1564	10.4692	11.9874	13.3747	12.6457	12.5268	-0.000404613	-0.143403	-0.142999	0.998185	0.497494	0.455616	0.998563	0.909368	0.8291
hsa-miR-1299-5p:Novel	No	No	12.5125	9.50788	13.0485	13.304	11.322	13.3638	-0.219237	-0.0421582	0.177079	0.212205	0.839007	0.349422	0.695738	0.979444	0.755675
hsa-miR-1301-3p	No	No	1.87256	2.12599	2.33388	2.83363	2.75705	2.78109	-0.00956773	-0.0864133	-0.0768456	0.97221	0.791975	0.795399	0.992699	0.97765	0.964688
hsa-miR-1301-5p	No	No	0.624187	0.699353	0.982468	0.926034	0.912914	1.18892	-0.0539811	0.32579	0.379771	0.88539	0.43745	0.307446	NA	0.87835	NA
hsa-miR-1302-3-5p:Novel	No	No	1.18074	1.09336	0.777959	1.52202	1.31502	1.01401	-0.232857	-0.417782	-0.184925	0.458695	0.284747	0.608136	NA	0.773855	0.899442
hsa-miR-1302-4-5p:Novel	No	No	5.59675	6.21101	6.24734	6.90317	6.62922	6.51759	-0.131323	-0.096107	0.0352157	0.479718	0.663727	0.861135	0.876352	0.960425	0.983146
hsa-miR-1302-5-5p:Novel	No	No	7.72934	5.54932	6.95921	8.92935	7.79103	7.51805	-0.246919	-0.145663	0.101257	0.224523	0.548041	0.647994	0.718255	0.923373	0.916803
hsa-miR-1302-6-5p:Novel	No	No	1.7659	1.3982	2.0454	1.80746	1.70851	3.39694	-0.0821924	0.76068	0.842873	0.782882	0.0214815	0.00419181	0.954617	0.327039	0.0845302
hsa-miR-1302-7-5p:Novel	No	No	2.90458	2.78959	3.23384	2.97085	3.96633	3.55416	0.424774	0.380842	-0.0439315	0.121887	0.241745	0.878125	0.582759	0.742599	0.990987
hsa-miR-1302-8-5p:Novel	No	No	4.19756	3.28009	3.99862	4.67776	3.3244	4.26187	-0.371483	-0.0154717	0.356011	0.0773404	0.949986	0.117991	0.497915	0.997645	0.522213
hsa-miR-1302:Novel	No	No	11.0265	11.1798	12.2068	23.5234	16.4514	15.0573	-0.524205	-0.687799	-0.163594	0.037481	0.0223034	0.551703	0.375665	0.330592	0.880283
hsa-miR-1303	No	No	8.25681	8.86439	7.99554	8.90821	9.87071	9.25626	0.145675	0.118628	-0.0270468	0.43036	0.590027	0.891231	0.849759	0.941911	0.990987
hsa-miR-1303-5p:Novel	No	No	10.2914	10.2486	10.9594	11.9917	11.0872	11.5709	-0.0704122	0.00690499	0.0773172	0.641665	0.969261	0.634201	0.924876	0.997645	0.910854
hsa-miR-1304-3p	No	No	5.25752	5.86735	6.0893	5.94679	6.50255	6.40997	0.110905	-0.00918166	-0.120086	0.561009	0.96768	0.555119	0.897021	0.997645	0.880735
hsa-miR-1304-5p	No	No	7.06359	8.90566	8.74628	9.36061	10.1165	11.6213	0.0913735	0.396865	0.305491	0.686808	0.138319	0.205335	0.929346	0.637937	0.637798
hsa-miR-1305	No	No	3.37176	3.63917	2.44135	6.53165	4.57989	3.56274	-0.508969	-0.846988	-0.338019	0.0787728	0.0165747	0.301025	0.497915	0.288681	0.717791
hsa-miR-1305-5p:Novel	No	No	4.49568	3.53179	4.07477	5.57367	3.4556	3.96366	-0.673624	-0.470818	0.202806	0.00117682	0.0563246	0.384144	0.0508539	0.489451	0.784842
hsa-miR-1306-3p	No	No	5.88843	5.88632	5.51207	6.34407	6.88229	5.42668	0.127469	-0.221381	-0.34885	0.48186	0.316744	0.0798711	0.876352	0.790135	0.438684
hsa-miR-1306-5p	No	No	0.766557	0.649043	0.715827	0.98794	0.995806	0.985233	0.0162628	-0.158051	-0.174314	0.965135	0.720807	0.660854	NA	0.967889	NA
hsa-miR-1307-5p	No	No	3.38547	3.75471	2.95903	5.09384	5.11126	3.69021	0.00770364	-0.4751	-0.482804	0.979124	0.184464	0.138348	0.994832	0.683343	0.549959
hsa-miR-130a-3p	No	No	0	0.523862	0	0.95623	0.86514	0.650718	-0.072328	-0.60436	-0.532032	0.865683	0.248393	0.266001	NA	0.746393	NA
hsa-miR-130a-5p	No	No	1.41283	1.8475	2.15441	2.03427	2.05986	2.34935	0.0589516	0.265031	0.206079	0.824279	0.382775	0.443081	0.963178	0.834353	0.821669
hsa-miR-130b-3p	No	No	1.31438	1.063	1.3636	1.25077	1.2127	1.6771	0.0391171	0.155855	0.116738	0.903884	0.67848	0.726369	NA	0.962434	0.939647
hsa-miR-130b-5p	No	No	1.28022	1.88397	0.482992	2.26897	2.35743	1.08464	0.0856744	-1.20284	-1.28851	0.810979	0.0105119	0.00290885	0.961962	0.227757	0.0654568
hsa-miR-132-3p	No	No	1.18074	1.2422	0	1.40855	1.66059	1.11432	0.246862	-0.640919	-0.887781	0.529321	0.192879	0.046137	NA	0.691894	0.329782
hsa-miR-132-5p	No	No	3.20054	3.18899	2.0454	3.78074	3.54884	2.59251	-0.0865247	-0.584268	-0.497743	0.710511	0.0450406	0.0627743	0.935784	0.450743	0.382296
hsa-miR-1321	No	No	3.92562	3.74581	3.74841	6.06981	6.04474	4.53538	0.0531217	-0.154251	-0.207373	0.838979	0.627461	0.471222	0.967431	0.9503	0.838698
hsa-miR-1321-5p:Novel	No	No	2.90458	2.43803	2.20483	3.0374	2.79633	2.83353	-0.142498	-0.0869329	0.0555648	0.512154	0.733866	0.81108	0.884112	0.970182	0.971096
hsa-miR-1322	No	No	2.36148	2.19791	2.7272	2.68145	2.68393	2.48394	-0.0537149	-0.0254201	0.0282948	0.820739	0.928383	0.911741	0.96284	0.994681	0.993963
hsa-miR-1322-5p:Novel	No	No	7.85125	6.19477	4.38377	9.01275	11.8916	5.93273	0.240346	-0.485958	-0.726304	0.428373	0.1881	0.0298998	0.849639	0.685997	0.263014
hsa-miR-1323	No	No	1.53311	2.02328	2.30526	1.92273	2.53046	2.56752	0.288243	0.338591	0.0503488	0.291346	0.290894	0.857342	0.771074	0.773855	0.981983
hsa-miR-1323-3p:Novel	No	No	1.77444	2.14967	1.96494	2.91867	3.07616	2.24284	0.0500656	-0.371461	-0.421527	0.87538	0.342774	0.235803	0.976637	0.806301	0.669171
hsa-miR-1324	No	No	5.14571	4.70906	4.66775	5.63653	5.14173	5.01618	-0.0675232	-0.283614	-0.216091	0.730584	0.229263	0.314496	0.938969	0.729392	0.722522
hsa-miR-1324-5p:Novel	No	Yes	12.421	11.8177	9.68343	22.1327	32.7543	17.1758	0.603606	-0.577529	-1.18114	0.0834908	0.166428	0.00177694	0.503619	0.665408	0.045854
hsa-miR-133a-3p	No	No	5.91128	4.26656	3.69582	5.48237	5.27316	4.90552	-0.0716715	-0.145867	-0.0741955	0.737002	0.568706	0.749761	0.939977	0.932191	0.946254
hsa-miR-133a-5p	No	No	6.64034	6.56018	6.95921	7.91411	6.32788	8.50329	-0.355983	0.0937511	0.449734	0.0479387	0.653295	0.0189943	0.423232	0.95687	0.206564
hsa-miR-133b	No	No	5.32331	4.99579	4.8827	6.15437	6.3668	6.17719	0.0629553	0.0391472	-0.0238081	0.741293	0.863156	0.907252	0.942371	0.983212	0.993228
hsa-miR-133b-5p:Novel	No	No	5.6513	5.10397	4.73445	5.55995	5.58455	5.14738	0.0262937	-0.0406714	-0.0669651	0.881481	0.847345	0.724732	0.976637	0.982423	0.939068
hsa-miR-134-3p	No	No	0.580915	0.687975	0.777959	0.853219	0.884387	0.714283	-0.00411402	-0.0792689	-0.0751549	0.991375	0.861169	0.852846	NA	0.982423	NA
hsa-miR-134-5p	No	No	2.55895	2.72938	2.30989	3.01345	3.04675	3.38273	0.0183051	0.14134	0.123035	0.937646	0.606908	0.616804	0.985412	0.944254	0.90168
hsa-miR-1343-3p	No	No	0	0	0.982468	0.331767	0.806643	1.28907	0.98426	1.554	0.569738	0.0416456	0.00354029	0.189184	NA	0.11392	NA
hsa-miR-1343-5p	No	No	1.74275	1.55381	1.38316	1.97375	2.23158	1.86952	0.0626639	-0.177287	-0.23995	0.833937	0.62594	0.464452	0.96623	0.950166	0.834927
hsa-miR-135a-2-3p	No	No	1.69274	1.02513	0.491234	1.60566	1.12738	0.923752	-0.705178	-0.91312	-0.207942	0.0182598	0.016028	0.570701	NA	0.286495	0.883601
hsa-miR-135a-3p	No	No	1.24837	1.09896	1.38593	1.37377	1.43548	1.22047	0.0976834	-0.0654116	-0.163095	0.763549	0.865893	0.637023	NA	0.983309	0.911432
hsa-miR-135a-5p	No	No	6.89902	7.19383	6.87728	10.6185	8.68835	9.61474	-0.253277	0.0447821	0.298059	0.281364	0.872256	0.240204	0.759415	0.983309	0.67323
hsa-miR-135b-3p	No	No	1.97043	2.04972	3.55084	2.71012	2.60021	3.71363	-0.09746	0.403464	0.500924	0.726987	0.207008	0.0820944	0.938306	0.705679	0.444198
hsa-miR-135b-5p	No	Yes	1.39919	1.57159	1.22068	2.33227	3.74774	1.30743	0.723862	-0.817563	-1.54143	0.0488098	0.0829119	0.000278617	0.423232	0.532537	0.0141398
hsa-miR-136-3p	No	No	0.65719	0.324522	0	0.866874	0.6561	0.624035	-0.125651	-0.160101	-0.0344505	0.753189	0.738682	0.936674	NA	NA	NA
hsa-miR-136-5p	No	No	2.94041	2.36148	2.36722	2.95123	3.13482	3.2344	0.0532982	0.183748	0.13045	0.818323	0.498867	0.590747	0.96284	0.910715	0.891252
hsa-miR-137-5p	No	No	1.87256	1.62656	1.3137	2.87241	2.39074	22.1685	-0.436604	-0.457653	-0.0210493	0.674152	0.711587	0.985115	0.929203	0.967389	0.99842
hsa-miR-138-1-3p	No	No	0.67847	1.00012	0	0.920815	1.10994	0.745379	-0.024721	-0.472768	-0.448047	0.948094	0.314078	0.294662	NA	0.788836	NA
hsa-miR-138-2-3p	No	No	0	0	0	0.174084	0.17173	0.146716	0.120045	-0.112075	-0.23212	0.868142	0.896496	0.765593	NA	NA	NA
hsa-miR-138-5p	No	No	9.93772	11.4363	9.76541	10.2475	11.8663	9.90337	0.2382	-0.0459619	-0.284162	0.0682949	0.770675	0.0428348	0.483561	0.976522	0.321261
hsa-miR-139-3p	No	No	2.09193	1.81958	1.84791	2.14763	2.14538	2.01986	-0.0900907	-0.155368	-0.0652773	0.752344	0.648224	0.832949	0.944715	0.956521	0.974762
hsa-miR-139-5p	No	No	1.39919	1.2966	1.55592	1.56376	1.49169	1.78028	-0.139798	-0.0429691	0.096829	0.658426	0.908585	0.776002	0.927188	0.992905	0.957514
hsa-miR-140-5p	No	Yes	3.2026	2.53268	2.41496	26.0195	8.91555	5.28727	-1.28121	-2.53512	-1.25391	0.00899961	1.90088e-05	0.0207895	0.182484	0.00294184	0.216545
hsa-miR-141-3p	No	No	2.62876	2.08821	2.13965	4.62357	3.9784	2.36164	-0.253766	-0.868034	-0.614268	0.524641	0.0756962	0.170038	0.890674	0.519157	0.602424
hsa-miR-141-5p	No	No	1.61836	1.063	1.6139	1.77996	1.44645	1.75639	-0.310535	-0.176133	0.134402	0.279876	0.598257	0.663349	0.758226	0.943798	0.922712
hsa-miR-143-5p	No	No	4.85507	3.91156	2.94741	9.37975	5.54434	6.00408	-0.67909	-0.728188	-0.0490982	0.0286301	0.0493317	0.885499	0.322517	0.458898	0.990987
hsa-miR-144-3p	No	No	1.11135	1.10138	1.10749	1.44984	1.4648	1.6669	0.0339213	0.119179	0.0852577	0.92935	0.790379	0.83245	NA	0.97765	0.974552
hsa-miR-144-5p	No	No	8.11443	7.92361	6.46768	14.4787	11.7598	8.83325	-0.33764	-0.695744	-0.358104	0.266571	0.056591	0.28198	0.750957	0.490455	0.70611
hsa-miR-145-3p	No	No	4.14233	4.68226	3.30724	10.9535	6.78307	5.17038	-0.600805	-1.22765	-0.626849	0.0543979	0.00119293	0.0721249	0.44394	0.0587427	0.415947
hsa-miR-145-5p	No	No	5.12087	6.07239	4.77261	17.6382	16.9946	17.4079	0.02557	-0.348239	-0.373809	0.95367	0.505935	0.43105	0.989581	0.911072	0.817296
hsa-miR-1468-3p	No	No	1.1375	0.599494	0.666437	1.38436	0.87226	0.721693	-0.522412	-0.793112	-0.270701	0.124911	0.0649316	0.507157	NA	0.505032	NA
hsa-miR-1468-5p	No	No	3.2026	1.90158	2.49894	3.12243	2.33205	3.07967	-0.431147	-0.0342035	0.396944	0.0752128	0.90256	0.126011	0.494416	0.991871	0.534703
hsa-miR-1469	No	Yes	1.96281	2.43984	2.14748	6.40312	18.0441	2.60621	1.20849	-1.09806	-2.30655	0.0203515	0.0851216	6.37781e-05	0.270942	0.537857	0.00441374
hsa-miR-1469-3p:Novel	No	No	0	0	0	0.717893	0.755283	0.273819	-0.150721	-1.02044	-0.869718	0.783924	0.132433	0.161896	NA	NA	NA
hsa-miR-146a-3p	No	No	3.37176	3.10762	3.33218	4.10499	3.72358	3.72232	-0.0576716	-0.0176387	0.0400329	0.798698	0.947577	0.869085	0.956828	0.997645	0.98733
hsa-miR-146a-5p	No	Yes	10.8818	12.422	7.7169	30.8229	147.675	21.1656	2.27062	-0.550012	-2.82063	3.13773e-06	0.343815	8.15589e-08	0.000827106	0.806301	6.20867e-05
hsa-miR-146b-3p	No	No	3.37176	3.10102	3.22781	4.52805	3.9279	4.01891	-0.128301	-0.251556	-0.123255	0.610671	0.404079	0.654131	0.916871	0.853992	0.920013
hsa-miR-1470	No	Yes	3.2026	3.03619	1.99931	4.10785	7.99075	2.81278	0.848335	-0.726098	-1.57443	0.0177799	0.0992956	7.24883e-05	0.256108	0.567571	0.00490504
hsa-miR-1470-3p:Novel	No	No	1.18074	1.62656	1.10749	1.99427	3.21431	1.42206	0.62687	-0.649118	-1.27599	0.123625	0.20555	0.00564022	0.587162	0.705234	0.0999587
hsa-miR-1471	No	No	4.36931	4.70906	4.42996	5.90323	5.46002	5.40168	-0.158184	-0.053851	0.104333	0.438331	0.824947	0.638205	0.856516	0.977782	0.911432
hsa-miR-1471-3p:Novel	No	No	0.457329	0	0.461977	0.904445	0.820844	0.638244	-0.239075	-0.615609	-0.376535	0.60538	0.275431	0.469194	NA	0.76656	NA
hsa-miR-147a	No	No	1.27947	1.89733	2.28444	1.81147	2.69621	2.69255	0.433423	0.626519	0.193096	0.151061	0.0752194	0.526295	0.629181	0.51903	0.869544
hsa-miR-147a-5p:Novel	No	No	3.9842	3.24522	3.55867	4.6108	3.5485	4.99004	-0.399129	0.278628	0.677757	0.118682	0.344666	0.0122682	0.579801	0.806301	0.163129
hsa-miR-147b-3p	No	No	1.51834	1.2422	1.3137	1.48803	2.06295	1.64095	0.483904	-0.0135241	-0.497428	0.181119	0.975034	0.192186	0.672194	0.997752	0.623966
hsa-miR-147b-5p	No	No	2.43565	2.80935	2.95903	2.79982	3.20199	5.0241	0.200937	0.785696	0.584759	0.483077	0.0157324	0.0418879	0.876352	0.284057	0.318872
hsa-miR-148a-5p	No	No	7.6704	10.6267	10.3159	10.7589	14.6284	14.9026	0.485297	0.363983	-0.121313	0.0667092	0.24516	0.666379	0.483561	0.743719	0.922712
hsa-miR-148b-3p	No	No	8.36771	6.06983	4.07477	48.7386	25.0266	21.5126	-0.854965	-1.75188	-0.896914	0.0658515	0.00158888	0.0752942	0.483561	0.0706911	0.425087
hsa-miR-148b-5p	No	No	5.50454	5.05819	5.01079	5.98636	5.61912	6.05352	-0.0595081	-0.0221559	0.0373522	0.738252	0.915798	0.843821	0.940567	0.994481	0.978757
hsa-miR-149-3p	No	No	3.31257	3.695	4.07477	5.49103	4.00158	4.5174	-0.489758	-0.296941	0.192817	0.0687466	0.351056	0.512	0.483561	0.807454	0.860397
hsa-miR-149-5p	No	No	3.20054	3.4309	3.28782	5.31495	8.54874	4.19023	0.705475	-0.521567	-1.22704	0.058381	0.248895	0.00262956	0.464931	0.746393	0.0606591
hsa-miR-150-3p	No	No	1.27947	1.30385	0.988996	1.39346	1.59	1.60273	0.204672	-0.131661	-0.336332	0.491142	0.712296	0.286305	NA	0.967389	0.710511
hsa-miR-150-5p	No	No	2.79838	2.14967	2.30526	4.96789	5.63202	7.15682	0.180973	0.245593	0.0646194	0.664516	0.617787	0.884406	0.927188	0.94684	0.990987
hsa-miR-151a-3p	No	Yes	12.3852	13.0715	12.0554	23.207	24.1725	14.2383	0.154008	-0.829576	-0.983585	0.572357	0.011466	0.000964412	0.900429	0.234556	0.0312408
hsa-miR-151a-5p	No	No	0.67847	0.609508	0	0.83903	0.892883	0.96545	0.0421503	0.406997	0.364846	0.927375	0.442538	0.439515	NA	0.87835	NA
hsa-miR-151b	No	No	9.6078	8.93195	9.33011	13.4649	12.0324	10.7723	-0.169665	-0.220116	-0.0504515	0.453604	0.416334	0.837863	0.860865	0.860194	0.977743
hsa-miR-151b-5p:Novel	No	No	8.25681	7.65596	7.37701	9.10138	8.31103	8.48822	-0.119046	-0.0825264	0.0365198	0.481228	0.681013	0.841547	0.876352	0.962808	0.977771
hsa-miR-152-5p	No	No	1.61836	1.10138	1.84421	2.10926	1.76796	1.94647	-0.123628	-0.232887	-0.10926	0.664958	0.489956	0.722426	0.927188	0.905807	0.93734
hsa-miR-153-1-5p:Novel	No	No	5.32331	4.77063	5.45441	6.21255	5.6161	5.41139	-0.172203	-0.152633	0.0195698	0.359399	0.496094	0.923908	0.820315	0.908044	0.995573
hsa-miR-153-2-5p	No	No	2.24784	3.03492	3.86394	2.65226	3.30228	4.41921	0.261774	0.775085	0.513311	0.293768	0.00612388	0.0369645	0.772828	0.154284	0.29856
hsa-miR-153-3p	No	No	8.52477	8.43756	7.11735	13.7396	10.9339	12.7356	-0.362622	-0.110183	0.252439	0.147706	0.710683	0.351418	0.629181	0.967389	0.757614
hsa-miR-1537-3p	No	No	0.624187	0	0	0.868764	0.486917	0.543785	-0.736286	-0.519069	0.217216	0.102332	0.334022	0.668316	NA	NA	NA
hsa-miR-1537-5p	No	No	1.06753	1.063	0.988996	1.27781	1.18798	1.26578	-0.194815	-0.167844	0.0269708	0.545364	0.657839	0.937933	NA	0.958305	0.996513
hsa-miR-1538	No	No	2.13507	1.82834	1.55592	3.61324	3.69067	2.20493	-0.00560875	-0.849164	-0.843555	0.987867	0.0620522	0.0425601	0.996572	0.5047	0.319989
hsa-miR-1538-5p:Novel	No	No	1.37199	1.04772	1.42643	2.00258	1.12693	1.37168	-0.74875	-0.712837	0.0359132	0.0303525	0.0826146	0.926942	NA	0.532537	0.995573
hsa-miR-1539	No	No	0.861214	1.25808	1.3137	1.27324	1.77994	1.87101	0.414537	0.627618	0.213081	0.248813	0.133461	0.555701	0.735254	0.62756	0.880735
hsa-miR-1539-5p:Novel	No	No	1.07338	1.26634	1.3636	1.08626	1.48393	1.62295	0.500149	0.438482	-0.0616667	0.132245	0.256409	0.849657	NA	0.752781	0.981114
hsa-miR-154-3p	No	No	0.735102	0.649043	0.923954	0.792387	1.00494	1.12585	0.32027	0.527939	0.20767	0.421849	0.254388	0.603908	NA	0.749331	NA
hsa-miR-154-5p	No	No	1.06753	0.948667	1.22068	1.5969	1.08312	1.73756	-0.578023	0.303216	0.881239	0.126466	0.47701	0.026452	NA	0.898145	0.243462
hsa-miR-155-3p	No	No	0	0	0	0.275041	0.412699	0.397958	0.539844	0.43345	-0.106394	0.353271	0.5277	0.861449	NA	NA	NA
hsa-miR-155-5p	No	No	2.13507	2.02328	2.49894	4.00664	3.23592	2.70074	-0.256626	-0.720135	-0.463509	0.447329	0.0788054	0.218173	0.860381	0.529271	0.651177
hsa-miR-1587	No	No	7.47273	7.00839	6.24734	8.76368	9.64842	8.09803	0.139696	-0.0335753	-0.173272	0.543835	0.903001	0.486123	0.896518	0.991871	0.846337
hsa-miR-1587-3p:Novel	No	No	1.12392	0.909792	0.869901	1.20832	0.968458	1.26969	-0.281785	-0.0748477	0.206937	0.40348	0.847138	0.561936	NA	0.982423	0.882053
hsa-miR-15a-3p	No	No	1.53311	1.84977	2.15441	2.34846	1.90813	2.34592	-0.286049	-0.140859	0.14519	0.289882	0.652134	0.613813	0.769517	0.95687	0.901199
hsa-miR-15a-5p	No	No	4.59934	4.96881	3.68842	5.50522	5.4461	4.92828	0.0027363	-0.149084	-0.15182	0.990779	0.599517	0.555276	0.996572	0.943798	0.880735
hsa-miR-15b-3p	No	No	1.32807	1.14363	1.39227	2.458	2.11481	1.67081	-0.144497	-0.658781	-0.514284	0.701904	0.153238	0.224192	0.930963	0.651245	0.657719
hsa-miR-15b-5p	No	No	1.72243	2.12599	3.32247	6.75659	4.03261	5.0625	-0.615318	-0.568054	0.0472645	0.119915	0.226647	0.912609	0.579801	0.727868	0.993963
hsa-miR-16-1-3p	No	No	2.275	1.78874	1.55592	2.3872	1.66403	1.93843	-0.513846	-0.401334	0.112511	0.0323343	0.158439	0.675765	0.342648	0.65596	0.925021
hsa-miR-16-2-3p	No	No	5.61961	4.13406	2.7272	10.6788	6.62602	5.54761	-0.618484	-1.23731	-0.61883	0.0942559	0.00552437	0.130117	0.535746	0.148916	0.535412
hsa-miR-16-5p	No	Yes	7.88628	9.50788	9.30576	44.3194	17.7631	11.8994	-1.15093	-2.05698	-0.906042	0.00164553	2.83165e-06	0.0238712	0.062273	0.000766906	0.232974
hsa-miR-17-3p	No	No	1.69274	1.30385	1.6139	1.8309	2.55589	1.99331	0.356171	0.0173315	-0.338839	0.316402	0.967911	0.376889	0.791305	0.997645	0.781092
hsa-miR-17-5p	No	No	1.41283	1.59592	1.4737	11.0128	4.52437	4.43677	-0.881312	-1.83418	-0.952869	0.0918694	0.00363772	0.0993416	0.529907	0.114782	0.488932
hsa-miR-181a-2-3p	No	No	2.78924	2.53268	2.86331	4.22843	3.04288	3.54445	-0.412981	-0.301401	0.111581	0.127968	0.34732	0.706502	0.596658	0.806301	0.933113
hsa-miR-181a-3p	No	No	3.83842	3.07916	2.459	4.17216	3.15037	3.47166	-0.439826	-0.247388	0.192438	0.0599776	0.371255	0.454317	0.469142	0.822797	0.828381
hsa-miR-181b-2-3p	No	No	2.03541	1.55381	1.43165	2.42669	1.67712	1.48072	-0.517332	-0.536385	-0.019053	0.0547866	0.101361	0.950875	0.444858	0.570184	0.997578
hsa-miR-181b-3p	No	No	6.18064	5.90371	6.24734	6.72248	5.9371	5.8299	-0.218992	-0.167606	0.0513861	0.167714	0.376307	0.767374	0.650233	0.825209	0.95448
hsa-miR-181b-5p	No	No	14.1772	14.1629	14.3213	17.2325	17.6504	15.5053	0.0448982	-0.136985	-0.181883	0.809824	0.539621	0.368785	0.961627	0.9204	0.773573
hsa-miR-181c-3p	No	No	3.83842	3.69955	3.11183	4.27413	5.56265	3.03522	0.238542	-0.476818	-0.71536	0.348568	0.134201	0.012926	0.815768	0.62756	0.168517
hsa-miR-181c-5p	No	No	1.51834	1.39882	0.923954	2.2531	1.88356	1.8071	-0.243903	-0.454851	-0.210948	0.420754	0.218908	0.536687	0.845707	0.718612	0.873023
hsa-miR-181d-3p	No	No	1.12392	1.00012	1.10749	1.24169	1.13876	1.20225	-0.00413417	0.0140347	0.0181688	0.990612	0.97272	0.960624	NA	0.997645	0.997578
hsa-miR-181d-5p	No	No	11.3026	10.0257	10.5096	14.5668	11.6568	11.7757	-0.312615	-0.321387	-0.00877172	0.0803554	0.132483	0.964261	0.500134	0.626739	0.997578
hsa-miR-182-3p	No	No	13.1438	12.7559	10.7374	19.2549	16.6751	11.3181	-0.175602	-0.775402	-0.5998	0.404918	0.00238813	0.0100795	0.845168	0.0902491	0.148939
hsa-miR-182-5p	No	No	5.3659	7.76904	7.37684	7.79111	9.60309	7.76182	0.323987	-0.0642005	-0.388188	0.148807	0.811672	0.108783	0.629181	0.977782	0.504947
hsa-miR-1825	No	No	0.65719	1.02513	0.777959	0.820131	1.08943	1.08498	0.430087	0.466921	0.0368336	0.272896	0.304941	0.92458	NA	0.777375	0.995573
hsa-miR-1825-5p:Novel	No	No	3.03668	3.10273	3.56608	3.21377	3.27882	3.38205	0.0918179	0.0263585	-0.0654594	0.675161	0.918866	0.77674	0.929203	0.994481	0.957514
hsa-miR-1827	No	No	2.95564	3.10102	2.6097	3.23682	3.26112	2.81367	0.0333232	-0.230007	-0.26333	0.869962	0.355471	0.240122	0.976253	0.811063	0.67323
hsa-miR-1827-5p:Novel	No	No	3.54887	3.29687	2.33388	3.46895	3.31364	2.88936	-0.161414	-0.414285	-0.252872	0.449185	0.112147	0.291138	0.860865	0.586842	0.71244
hsa-miR-183-3p	No	No	0	0.642346	0	0.450628	0.731487	0.569613	0.436887	0.423602	-0.0132851	0.328915	0.421807	0.976737	NA	NA	NA
hsa-miR-183-5p	No	No	8.82011	7.45322	6.24734	9.12233	9.53091	6.88826	0.070732	-0.396586	-0.467318	0.747963	0.138342	0.0544071	0.942462	0.637937	0.35937
hsa-miR-184	No	No	2.58364	2.53268	3.68842	4.07254	3.78452	4.61274	-0.117467	0.329411	0.446879	0.719738	0.392155	0.200126	0.935784	0.84372	0.634114
hsa-miR-184-5p:Novel	No	No	6.62514	5.65192	6.85332	11.8424	6.91606	8.06312	-0.738743	-0.553224	0.185519	0.00317239	0.0626512	0.499132	0.0982676	0.505032	0.853502
hsa-miR-1843-3p:Novel	No	No	5.52095	5.19234	4.66775	5.32098	5.7593	7.56659	0.102343	0.496909	0.394565	0.635906	0.0469946	0.0771463	0.924781	0.452722	0.431538
hsa-miR-185-3p	No	No	5.22824	5.31973	5.51207	5.90629	6.06845	7.03363	0.0976797	0.240403	0.142724	0.668711	0.36896	0.552742	0.929196	0.821316	0.880283
hsa-miR-185-5p	No	No	11.0091	13.4893	7.90396	30.2549	23.489	21.3201	-0.190216	-0.685195	-0.494979	0.615733	0.129193	0.227297	0.916871	0.6232	0.661455
hsa-miR-186-3p	No	No	5.91128	7.06359	5.33801	7.0396	7.68718	7.09709	0.108158	0.0992721	-0.00888624	0.617777	0.700986	0.969555	0.916871	0.966159	0.997578
hsa-miR-186-5p	No	Yes	9.93772	7.49161	4.66775	100.817	37.3166	25.4225	-0.891032	-2.44602	-1.55499	0.0779841	5.08416e-05	0.00457372	0.497915	0.0064196	0.0892754
hsa-miR-187-3p	No	No	1.92033	1.37802	1.97799	2.15767	2.33041	1.81776	0.107919	-0.184867	-0.292786	0.721324	0.614031	0.374935	0.936193	0.946164	0.780367
hsa-miR-187-5p	No	No	2.56043	3.79467	2.95903	3.35359	4.57611	3.45945	0.421547	-0.13286	-0.554407	0.120293	0.685454	0.0580751	0.579801	0.962808	0.369183
hsa-miR-188-3p	No	No	1.69274	1.14363	1.38593	1.77294	1.44213	1.99192	-0.134619	0.348851	0.48347	0.663605	0.324275	0.129062	0.927188	0.793444	0.535299
hsa-miR-188-5p	No	No	1.06753	1.37802	1.10749	1.62841	1.62099	1.25792	0.127793	-0.175395	-0.303188	0.685289	0.655397	0.389282	NA	0.957624	0.787517
hsa-miR-18a-3p	No	No	0.809179	1.03367	0.982468	1.11749	1.6501	1.2115	0.512823	0.103123	-0.409701	0.218126	0.836497	0.351118	NA	0.979381	0.757614
hsa-miR-18b-3p	No	No	1.1375	0.629039	0.922105	1.43378	1.1693	1.05686	-0.290907	-0.326633	-0.0357262	0.424827	0.466745	0.931301	NA	0.891257	0.995942
hsa-miR-18b-5p	No	No	0	0	0	0.722443	0.608633	0.428662	-0.122752	-0.726522	-0.60377	0.82581	0.28548	0.331324	NA	NA	NA
hsa-miR-1908-3p	No	No	1.69274	1.84977	1.93197	2.37415	2.53195	2.37847	0.147196	-0.0592604	-0.206456	0.633118	0.872521	0.533647	0.924781	0.983309	0.871723
hsa-miR-1908-5p	No	No	2.65614	2.75604	2.0454	4.49544	3.95465	3.28517	-0.319971	-0.399289	-0.0793178	0.344122	0.327123	0.831793	0.815768	0.793988	0.974172
hsa-miR-1909-3p	No	No	0	0.813281	0.715827	0.944237	1.46912	1.19669	0.541536	0.167426	-0.37411	0.266338	0.772908	0.464365	NA	0.976522	0.834927
hsa-miR-1909-5p	No	No	1.11135	1.2422	1.10241	1.1859	1.48303	1.76408	0.323709	0.340072	0.0163629	0.322364	0.365823	0.959845	NA	0.820912	0.997578
hsa-miR-190a-3p	No	No	0.882948	0	0.715827	1.29016	0.694944	1.06709	-0.870018	-0.311951	0.558067	0.0591023	0.560036	0.271425	NA	0.929432	NA
hsa-miR-190a-5p	No	No	1.39462	1.07483	1.14222	2.0779	1.66875	1.38539	-0.429672	-0.405793	0.0238795	0.143855	0.262378	0.943776	0.628857	0.757417	0.997578
hsa-miR-190b-3p	No	No	0	0	0	0.430401	0.47268	0.364702	0.34354	-0.167712	-0.511252	0.546818	0.806767	0.403497	NA	NA	NA
hsa-miR-190b-5p	No	No	5.91471	5.12567	5.91806	6.328	6.69494	6.71947	0.121281	0.169775	0.0484944	0.615749	0.5534	0.850836	0.916871	0.924851	0.981114
hsa-miR-191-3p	No	No	1.35694	1.2422	1.4737	1.77792	1.81583	1.66457	-0.0902204	-0.137658	-0.0474381	0.789006	0.731377	0.896472	0.955746	0.970182	0.992524
hsa-miR-1910-3p	No	No	3.39235	5.00062	5.44571	5.00618	5.88191	5.34636	0.19573	0.145836	-0.0498942	0.431692	0.622933	0.851261	0.850364	0.949503	0.981114
hsa-miR-1910-5p	No	No	0	0.973565	0	0.812388	1.1017	0.559146	0.335978	-0.450759	-0.786737	0.36771	0.343483	0.0618742	NA	0.806301	NA
hsa-miR-1911-3p	No	No	0.828465	0.615833	0.869901	1.09659	0.849456	1.26374	-0.36812	0.246884	0.615004	0.344807	0.576467	0.129732	NA	0.937519	0.535299
hsa-miR-1911-5p	No	No	1.96281	1.18074	3.22781	2.80649	2.01917	3.93493	-0.491078	0.366113	0.857191	0.159944	0.357218	0.0190955	0.642002	0.812996	0.206831
hsa-miR-1912-3p	No	No	0.640108	0.899229	1.10241	0.975844	1.30976	1.14498	0.392856	0.19235	-0.200505	0.2897	0.662649	0.601054	NA	0.959784	0.896298
hsa-miR-1912-5p	No	No	3.31257	3.28009	2.44135	3.9169	3.91534	3.23107	0.0479119	-0.096333	-0.144245	0.860387	0.768701	0.626142	0.971729	0.976522	0.908339
hsa-miR-1913	No	No	1.28022	1.23167	1.42643	1.48193	1.69499	1.84732	0.173598	0.0109771	-0.162621	0.583621	0.976666	0.625319	0.904423	0.998523	0.908009
hsa-miR-1913-5p:Novel	No	No	7.22909	7.77304	8.81932	8.63456	8.46334	8.83214	0.00770275	0.0559431	0.0482404	0.966705	0.79779	0.806816	0.992303	0.977782	0.970697
hsa-miR-1914-3p	No	No	0.624187	0.813281	0.869901	1.19325	1.34675	1.28368	0.0748616	0.00588374	-0.0689778	0.861773	0.990855	0.88131	NA	0.999103	0.990987
hsa-miR-1914-5p	No	No	1.35694	1.00012	1.38593	1.90756	1.72247	3.18723	-0.0877282	0.796371	0.8841	0.836647	0.102634	0.0442376	0.96623	0.57155	0.326473
hsa-miR-1915-3p	No	Yes	1.51834	1.2422	1.43165	3.18105	5.82093	1.48625	0.774497	-1.06356	-1.83805	0.11952	0.0866656	0.00107633	0.579801	0.539358	0.0332914
hsa-miR-1915-5p	No	No	0	0	0	0.261674	0.614672	0.381355	0.801808	0.118597	-0.683211	0.11323	0.846629	0.199873	NA	NA	NA
hsa-miR-192-3p	No	No	0.457329	0	0	0.672238	0.549591	0.706398	-0.16339	-0.0392329	0.124157	0.705686	0.937613	0.783806	NA	NA	NA
hsa-miR-192-5p	No	Yes	6.64034	7.00839	4.30883	41.4437	18.8978	12.7376	-0.835847	-1.94489	-1.10904	0.0466821	0.000113107	0.0156525	0.4191	0.0102111	0.18618
hsa-miR-193a-3p	No	No	1.53311	1.39871	1.3137	1.82306	2.42409	1.65691	0.266503	-0.129216	-0.395719	0.414592	0.748038	0.270568	0.845168	0.9729	0.696434
hsa-miR-193a-5p	No	No	8.87218	10.7092	9.19591	17.1167	14.0936	11.6853	-0.254377	-0.61394	-0.359562	0.300079	0.0372114	0.180937	0.778342	0.412993	0.614902
hsa-miR-193b-3p	No	No	1.72243	2.48441	2.30989	5.75864	8.41473	4.96649	0.613354	-0.588313	-1.20167	0.194495	0.30072	0.0194549	0.680987	0.773855	0.20786
hsa-miR-193b-5p	No	No	2.03541	1.94713	1.84791	2.49659	2.54745	1.97639	0.0940066	-0.188657	-0.282664	0.75535	0.60839	0.394826	0.945993	0.944254	0.791407
hsa-miR-194-1-3p:Novel	No	No	2.49675	3.0754	2.44135	3.30614	3.50516	3.39096	0.0979346	0.0869089	-0.0110257	0.687929	0.763783	0.966046	0.929346	0.975745	0.997578
hsa-miR-194-3p	No	No	2.65614	2.14967	2.459	2.94454	2.31641	2.66363	-0.192581	-0.161107	0.0314742	0.413216	0.558619	0.900585	0.845168	0.929158	0.993228
hsa-miR-194-5p	No	No	10.6753	13.2074	13.137	20.2004	17.9053	17.5719	-0.151553	-0.26612	-0.114567	0.536261	0.361975	0.665837	0.895399	0.816391	0.922712
hsa-miR-195-3p	No	No	1.65693	1.90158	2.459	1.84212	2.32842	2.67444	0.286792	0.476858	0.190066	0.271484	0.111691	0.461521	0.753744	0.586842	0.832719
hsa-miR-195-5p	No	No	0	0.199831	0	0.635222	0.709414	0.273081	0.227669	-0.956063	-1.18373	0.613212	0.0955154	0.0218187	NA	NA	NA
hsa-miR-196a-1-3p	No	No	0.766557	1.063	1.3137	1.05629	1.05122	1.33429	0.0976778	0.389127	0.291449	0.777293	0.320976	0.394568	NA	0.792147	0.791407
hsa-miR-196a-3p	No	No	7.59169	6.8618	5.01079	10.053	10.4153	6.18821	0.073138	-0.73434	-0.807478	0.756698	0.0111689	0.0021891	0.945993	0.234556	0.0537565
hsa-miR-196a-5p	No	No	13.2442	13.8189	14.5251	16.7777	16.9472	15.4606	0.0543595	-0.186957	-0.241317	0.77237	0.404188	0.234826	0.950985	0.853992	0.667644
hsa-miR-196b-3p	No	No	0	0	0.681801	0.521903	0.611807	0.811904	0.411714	0.374311	-0.0374025	0.353439	0.464239	0.93169	NA	NA	NA
hsa-miR-196b-5p	No	No	11.1935	13.1513	13.1513	16.3883	21.083	23.3156	0.320601	0.581809	0.261208	0.269037	0.0907544	0.400114	0.751761	0.54722	0.798089
hsa-miR-197-3p	No	No	9.6039	10.3196	6.46324	22.9672	19.2139	21.3813	-0.215751	-0.489121	-0.27337	0.549157	0.25366	0.4823	0.897021	0.74877	0.843399
hsa-miR-197-5p	No	No	1.97157	2.12789	1.93197	2.36294	2.76128	2.76557	0.166682	0.135106	-0.0315761	0.516306	0.6524	0.905389	0.886056	0.95687	0.993228
hsa-miR-1972	No	No	3.83279	3.65705	3.69582	4.028	3.8055	3.80257	-0.0520612	-0.18826	-0.136199	0.821002	0.496028	0.587697	0.96284	0.908044	0.891252
hsa-miR-1972-5p:Novel	No	No	1.97157	2.60771	2.45617	2.38356	2.49547	2.60643	0.0303871	0.212025	0.181638	0.900299	0.45276	0.469879	0.977649	0.881341	0.838698
hsa-miR-1973	No	No	0	0	0	0.634694	0.397236	0.350512	-0.594445	-0.654853	-0.0604078	0.211914	0.256403	0.909483	NA	NA	NA
hsa-miR-1973-5p:Novel	No	No	2.28664	2.14967	1.4737	2.6023	2.50716	2.60207	-0.024049	-0.0549294	-0.0308804	0.936375	0.878439	0.924317	0.985343	0.986974	0.995573
hsa-miR-1976	No	No	1.10419	0.776904	1.09594	1.22626	0.945755	1.2082	-0.391642	-0.21676	0.174882	0.264204	0.596452	0.646164	NA	0.943798	0.916417
hsa-miR-1976-5p:Novel	No	Yes	2.14675	1.59592	1.10241	2.08937	2.67394	1.01105	0.23467	-0.981412	-1.21608	0.458944	0.0208147	0.001724	0.865362	0.323674	0.0449151
hsa-miR-198	No	No	2.79838	1.89733	2.28444	2.93138	2.5965	2.9642	-0.165335	0.0269041	0.192239	0.515526	0.927924	0.477542	0.885871	0.994681	0.838698
hsa-miR-198-3p:Novel	No	No	1.24837	1.82852	1.7398	1.46363	2.16755	2.16401	0.496137	0.386759	-0.109378	0.12334	0.307642	0.738548	0.586869	0.781122	0.943219
hsa-miR-199b-5p	No	No	7.86745	7.43891	6.22367	36.5291	21.6013	19.9362	-0.456335	-1.30833	-0.851996	0.276902	0.00902273	0.0613835	0.758226	0.206506	0.377136
hsa-miR-19a-3p	No	No	4.49568	5.18639	4.66775	10.7819	6.43434	6.07539	-0.739941	-0.825305	-0.0853643	0.0197172	0.0300672	0.807288	0.26791	0.3764	0.97085
hsa-miR-19a-5p	No	No	2.64885	1.82834	2.28444	3.69503	2.74928	3.18526	-0.48589	-0.164568	0.321321	0.0970409	0.632994	0.313877	0.538785	0.951674	0.722522
hsa-miR-19b-5p	No	No	2.36148	2.02328	1.99931	2.77565	2.34689	2.03449	-0.161976	-0.301788	-0.139813	0.495703	0.298367	0.598981	0.877802	0.773855	0.895384
hsa-miR-200a-3p	No	Yes	4.85507	5.18639	4.38377	16.5207	23.3089	5.85786	0.638375	-1.6048	-2.24317	0.133724	0.00190568	1.78695e-06	0.608708	0.0774181	0.00049466
hsa-miR-200a-5p	No	No	4.4454	6.06983	3.11183	5.21949	7.17122	5.08138	0.507013	-0.108252	-0.615265	0.0419964	0.719902	0.022469	0.391175	0.967889	0.225082
hsa-miR-200b-3p	No	Yes	5.31227	4.57453	3.69582	32.9007	34.5023	9.66147	0.515171	-2.18409	-2.69926	0.314133	0.00039383	1.43411e-06	0.790883	0.027825	0.000485207
hsa-miR-200b-5p	No	No	1.27947	1.18177	0.681801	1.67133	1.61267	1.02096	0.129726	-0.878716	-1.00844	0.703651	0.0450257	0.0118111	NA	0.450743	0.160558
hsa-miR-200c-3p	No	Yes	2.2227	3.18042	1.38593	22.2212	18.9438	3.49065	-0.035051	-2.8334	-2.79835	0.952437	7.34705e-05	1.73103e-05	0.989581	0.00770255	0.00164719
hsa-miR-200c-5p	No	No	3.44486	3.10102	3.74841	4.09747	3.35404	3.88472	-0.362741	-0.0150235	0.347718	0.104619	0.954	0.147676	0.558249	0.997645	0.567267
hsa-miR-202-3p	No	No	0.697309	0.696072	0	0.828288	1.45929	0.556956	0.860177	-0.198997	-1.05917	0.0750968	0.743249	0.0456685	NA	0.9729	0.329166
hsa-miR-202-5p	No	No	1.97043	3.29687	3.32247	2.26263	3.75954	3.11502	0.666635	0.312322	-0.354312	0.00809911	0.296071	0.166414	0.172172	0.773855	0.59756
hsa-miR-203a-5p	No	No	5.80915	6.21101	5.08175	8.50818	7.84033	6.46657	-0.0980059	-0.386002	-0.287996	0.666977	0.160075	0.25026	0.928274	0.656773	0.684439
hsa-miR-203b-3p	No	No	5.91471	6.50904	6.0057	6.44337	7.34964	7.05754	0.175137	0.125741	-0.0493953	0.321857	0.548408	0.791469	0.796278	0.923373	0.962027
hsa-miR-203b-5p	No	No	0	0	0	0.439254	0.523874	0.278817	0.216696	-0.427379	-0.644075	0.670116	0.492522	0.248007	NA	NA	NA
hsa-miR-204-3p	No	No	3.2026	2.46636	3.22781	3.34421	3.4379	3.93719	0.0198642	0.159829	0.139965	0.93441	0.571654	0.581244	0.984781	0.933606	0.887287
hsa-miR-204-5p	No	No	4.36931	3.10273	3.66203	4.6375	3.29103	4.33009	-0.416978	-0.176819	0.240159	0.0789573	0.525484	0.351541	0.497915	0.916964	0.757614
hsa-miR-205-3p	No	No	1.27947	1.59865	1.42643	2.34201	2.50836	2.36454	0.0974189	0.0176966	-0.0797223	0.783443	0.966491	0.833646	0.954617	0.997645	0.975202
hsa-miR-2052	No	No	9.63295	8.13281	9.56891	10.2183	9.20945	10.187	-0.154847	-0.00795557	0.146892	0.425122	0.972344	0.48173	0.848314	0.997645	0.843027
hsa-miR-2052-3p:Novel	No	No	2.43565	2.75604	3.33218	3.42611	3.28241	3.75871	0.0849137	0.230974	0.14606	0.743941	0.446044	0.590497	0.942371	0.878572	0.891252
hsa-miR-2053	No	No	1.18074	0.642346	1.3137	1.19096	1.09403	1.43957	-0.194206	0.13696	0.331166	0.57279	0.729205	0.356438	NA	0.970182	0.761697
hsa-miR-2054	No	No	0.861214	1.2422	1.10241	1.3863	1.3339	1.17526	-0.0400461	-0.105593	-0.0655469	0.897312	0.776795	0.845322	NA	0.976845	0.978757
hsa-miR-2054-3p:Novel	No	No	0.735102	0	0	0.968554	0.68826	0.821175	-0.407832	0.0270347	0.434866	0.335551	0.955966	0.335204	NA	0.997645	NA
hsa-miR-206	No	No	2.95564	3.82798	3.32247	3.16367	4.14505	3.923	0.345167	0.395132	0.0499644	0.120315	0.130934	0.826366	0.579801	0.623977	0.974172
hsa-miR-206-5p:Novel	No	No	2.56043	3.28009	3.30724	2.98965	4.18229	3.54324	0.429287	0.312843	-0.116444	0.0702106	0.270261	0.638281	0.483561	0.764771	0.911432
hsa-miR-208a-3p	No	No	1.1375	1.55381	2.33388	1.57901	2.14369	2.80157	0.408682	0.872945	0.464264	0.178561	0.0113555	0.1139	0.666748	0.234556	0.5123
hsa-miR-208a-5p	No	No	0	0	0	0.406588	0.741955	0.792928	0.668819	0.587215	-0.0816038	0.166365	0.301127	0.86696	NA	NA	NA
hsa-miR-208b-3p	No	No	4.12841	3.18042	2.6274	4.05169	4.92137	3.46167	0.270934	-0.153121	-0.424054	0.315039	0.641204	0.150795	0.791305	0.955924	0.573505
hsa-miR-208b-5p	No	No	0.828465	1.04772	1.33287	0.964286	1.49162	1.7859	0.499897	0.897819	0.397922	0.138478	0.0153107	0.191265	NA	0.27955	0.623966
hsa-miR-20a-3p	No	No	0.67847	0	0.666437	0.917491	0.54626	0.964333	-0.471566	0.403773	0.875339	0.248185	0.373569	0.0355506	NA	0.823186	NA
hsa-miR-20a-5p	No	Yes	1.69274	1.87735	1.09594	28.3197	5.61766	3.37549	-1.99004	-3.50677	-1.51673	0.000757238	1.07287e-06	0.0215221	0.0376619	0.000435854	0.220037
hsa-miR-20b-3p	No	No	1.35694	1.23167	1.58079	1.59105	1.33835	2.24961	-0.151921	0.367413	0.519334	0.632172	0.300387	0.104227	0.924781	0.773855	0.49967
hsa-miR-20b-5p	No	No	0.914658	0	1.18361	1.20164	2.0723	1.62322	0.64594	0.877852	0.231913	0.274432	0.209711	0.707611	0.756698	0.70973	0.933113
hsa-miR-21-3p	No	No	3.54223	4.59612	3.28782	4.3631	5.58299	4.35077	0.331592	-0.0711419	-0.402734	0.23249	0.83149	0.179404	0.72698	0.979381	0.613552
hsa-miR-210-3p	No	No	13.7397	12.966	6.81801	28.8176	37.3687	27.8078	0.421929	-0.537812	-0.959741	0.249938	0.218652	0.0154114	0.735254	0.718612	0.184128
hsa-miR-210-5p	No	No	0	0.531973	0.461052	0.482327	0.844303	0.58713	0.729555	0.0315195	-0.698035	0.105965	0.954111	0.136325	NA	NA	NA
hsa-miR-211-3p	No	No	1.37614	1.82834	1.97799	1.65522	2.43954	3.10113	0.588339	0.761756	0.173417	0.0973492	0.0627325	0.624045	0.539102	0.505032	0.907024
hsa-miR-211-5p	No	No	2.79838	3.89426	4.17681	3.67268	4.11482	5.22359	0.241593	0.473769	0.232176	0.244878	0.0476759	0.266335	0.734725	0.452722	0.695802
hsa-miR-2110	No	No	3.92562	4.55429	4.30883	5.0829	5.32446	5.35266	0.0855701	0.00882373	-0.0767463	0.717265	0.97477	0.760116	0.935784	0.997752	0.953293
hsa-miR-2110-3p:Novel	No	No	3.9842	5.54932	3.4796	8.07664	9.46974	6.77707	0.180099	-0.316866	-0.496966	0.599303	0.440917	0.182112	0.911614	0.87835	0.615477
hsa-miR-2113	No	No	5.55675	6.16591	4.66506	6.7237	6.31266	5.40326	-0.127509	-0.373588	-0.246078	0.514566	0.112629	0.25312	0.885597	0.586842	0.685608
hsa-miR-2113-5p:Novel	No	No	3.54223	3.71945	3.66203	5.84489	8.12854	7.78751	0.400562	0.568266	0.167704	0.308352	0.223168	0.689457	0.786811	0.722364	0.929621
hsa-miR-2114-3p	No	No	0.882948	0.616591	0.922105	1.01965	0.942891	1.34537	-0.0955437	0.215307	0.310851	0.789214	0.591683	0.386201	NA	0.942414	0.785034
hsa-miR-2114-5p	No	No	1.53311	1.23167	2.14748	2.1122	1.70756	2.2792	-0.290962	0.177459	0.468421	0.349368	0.618433	0.150863	0.815768	0.94684	0.573505
hsa-miR-2115-3p	No	No	2.24784	2.35453	1.84421	3.21112	2.78374	2.27423	-0.138505	-0.56594	-0.427435	0.599658	0.0824873	0.153626	0.911614	0.532537	0.579335
hsa-miR-2115-5p	No	No	1.92033	1.87735	1.84791	2.43738	2.13396	2.1501	-0.102218	-0.379154	-0.276937	0.719326	0.265809	0.373809	0.935784	0.758368	0.779622
hsa-miR-2116-3p	No	No	2.42754	2.19791	1.6139	2.68101	2.87774	2.19694	0.111323	-0.335851	-0.447174	0.670923	0.29408	0.121587	0.929203	0.773855	0.529661
hsa-miR-2116-5p	No	No	1.97043	2.51615	1.55592	6.33413	6.10534	3.15381	-0.0120849	-1.04648	-1.0344	0.978776	0.0581306	0.0398012	0.994832	0.495865	0.308171
hsa-miR-2117	No	No	4.92607	4.74333	5.33801	5.46927	5.6924	5.3949	0.0130887	-0.077147	-0.0902356	0.945566	0.735445	0.661632	0.987649	0.970182	0.922712
hsa-miR-2117-5p:Novel	No	No	8.09179	9.45414	10.9594	13.1462	13.3574	13.3131	0.0312014	-0.000746879	-0.0319482	0.906029	0.998104	0.91066	0.980254	0.999681	0.993963
hsa-miR-212-3p	No	No	0.65719	0	0	0.834658	0.75936	0.704775	-0.0833621	0.0134183	0.0967804	0.84785	0.979057	0.833746	NA	0.998523	NA
hsa-miR-212-5p	No	No	1.11135	0.911424	1.22068	1.33691	1.13996	1.66921	-0.2057	0.268453	0.474153	0.547212	0.481189	0.169545	NA	0.901209	0.602424
hsa-miR-214-3p	No	No	0.985213	0	0.461052	1.23905	0.676493	0.692894	-0.910371	-0.775582	0.134789	0.0132535	0.0780331	0.754163	NA	0.528349	NA
hsa-miR-214-5p	No	No	1.41283	1.59021	1.93197	1.71802	1.69235	1.97963	-0.028591	0.256715	0.285306	0.919365	0.429741	0.324177	0.982695	0.872366	0.730296
hsa-miR-215-3p	No	No	3.92562	2.45827	2.15441	3.49444	2.8145	2.78924	-0.29083	-0.306046	-0.015216	0.228644	0.293734	0.954904	0.723941	0.773855	0.997578
hsa-miR-215-5p	No	No	2.55895	2.43803	2.95903	3.16101	3.77295	3.30325	0.12958	0.102233	-0.0273474	0.679752	0.785347	0.935462	0.929203	0.97765	0.996303
hsa-miR-216a-3p	No	Yes	2.79838	3.24522	2.19188	4.688	6.35387	2.78285	0.442646	-0.731533	-1.17418	0.170929	0.0681333	0.00121512	0.65585	0.509346	0.0355929
hsa-miR-216a-5p	No	No	1.53311	1.07483	0.777959	2.24037	1.91502	1.17678	-0.138926	-0.839399	-0.700474	0.713486	0.076356	0.108244	0.935784	0.519157	0.50321
hsa-miR-216b-3p	No	No	3.12093	3.08295	4.30883	4.00817	3.89031	3.92594	-0.138863	0.00128915	0.140152	0.56166	0.996372	0.586862	0.897021	0.999681	0.891252
hsa-miR-216b-5p	No	No	7.88171	8.35286	7.90396	9.26313	9.51615	11.3899	0.0276447	0.279379	0.251734	0.885373	0.213892	0.213971	0.976637	0.71665	0.650401
hsa-miR-217-3p	No	No	0	0	0	0.412474	0.495365	0.514052	0.256388	0.296208	0.0398203	0.577256	0.584134	0.933067	NA	NA	NA
hsa-miR-217-5p	No	No	3.39235	2.43984	2.0454	3.40523	3.39657	2.35023	-0.0620322	-0.344606	-0.282574	0.801354	0.260531	0.3117	0.956828	0.756006	0.722522
hsa-miR-218-1-3p	No	No	1.12392	0.819424	0.491234	1.08127	1.03427	0.681659	-0.219835	-0.499703	-0.279868	0.519847	0.237189	0.473406	NA	0.740359	NA
hsa-miR-218-2-3p	No	No	1.18074	1.06395	0.988996	1.54503	1.70939	1.31995	0.118625	-0.0650569	-0.183682	0.717448	0.868985	0.602285	0.935784	0.983309	0.896298
hsa-miR-218-5p	No	No	11.1958	10.7483	10.0216	11.0917	12.5091	9.81214	0.203549	-0.227131	-0.43068	0.293609	0.330283	0.0409306	0.772828	0.79665	0.31315
hsa-miR-219a-1-3p	No	No	1.53311	1.3982	1.22068	2.36037	2.37229	1.90209	0.0184087	-0.0988242	-0.117233	0.956838	0.810031	0.752678	0.990076	0.977782	0.94746
hsa-miR-219a-2-3p	No	No	10.6245	8.62166	10.5096	11.378	13.2098	11.0518	0.217514	-0.0375077	-0.255022	0.310085	0.883709	0.270206	0.786811	0.988659	0.696434
hsa-miR-219a-5p	No	No	4.55502	4.71476	4.66775	5.19179	6.04677	5.49534	0.195112	0.0317261	-0.163386	0.384539	0.906065	0.498039	0.839805	0.992487	0.85339
hsa-miR-219b-3p	No	No	1.97043	2.08821	1.55592	2.37609	2.43752	2.03552	0.0640505	-0.114388	-0.178438	0.824635	0.74538	0.574193	0.963178	0.9729	0.88486
hsa-miR-219b-5p	No	No	0.624187	0.651927	0.869901	0.640714	0.932288	0.843127	0.457721	0.144691	-0.31303	0.259448	0.765255	0.450633	NA	0.976113	NA
hsa-miR-22-5p	No	Yes	5.29769	3.43987	2.49894	7.54655	7.93447	3.43902	0.187522	-1.29372	-1.48124	0.59415	0.00288782	0.000185809	0.910333	0.0996535	0.0106753
hsa-miR-221-5p	No	No	6.97309	6.16591	5.91806	8.23685	6.88812	6.80485	-0.188317	-0.392487	-0.20417	0.377954	0.1254	0.383596	0.830884	0.615126	0.784842
hsa-miR-222-3p	No	No	10.6753	11.3038	9.83601	20.5707	23.0727	16.3785	0.237115	-0.581018	-0.818134	0.466853	0.135898	0.0205642	0.867758	0.631764	0.215924
hsa-miR-222-5p	No	No	4.2935	4.40327	4.84171	4.69918	5.02809	5.63368	0.104329	0.267352	0.163023	0.635484	0.299563	0.479262	0.924781	0.773855	0.841126
hsa-miR-224-3p	No	No	0	0	0	0.555024	1.0201	0.338599	0.896492	-0.289375	-1.18587	0.0713953	0.643428	0.0288544	NA	NA	NA
hsa-miR-224-5p	No	No	6.62514	4.59612	3.88979	9.90366	10.0899	6.68627	0.124393	-0.764084	-0.888477	0.71397	0.0621169	0.0169812	0.935784	0.5047	0.194369
hsa-miR-2276-3p	No	No	2.14675	1.62261	1.42643	2.32019	1.81193	1.68229	-0.318109	-0.390972	-0.0728637	0.23636	0.229393	0.809362	0.731704	0.729392	0.971096
hsa-miR-2276-5p	No	No	3.2026	2.56938	1.6139	3.48635	4.12406	2.44799	0.269689	-0.510721	-0.78041	0.391363	0.189479	0.0266249	0.843465	0.687283	0.243462
hsa-miR-2277-3p	No	No	1.96281	1.88397	1.97799	2.67496	2.27937	2.09946	-0.215976	-0.545493	-0.329518	0.41771	0.0961471	0.276482	0.845168	0.562011	0.701573
hsa-miR-2277-5p	No	Yes	3.9842	2.43984	4.38377	4.4973	15.7994	4.96606	1.86012	0.093348	-1.76677	1.75727e-05	0.857839	0.000145584	0.0028951	0.982423	0.00869222
hsa-miR-2278	No	No	11.0419	10.6525	12.4554	12.0877	11.5513	12.2586	-0.0756026	0.0187204	0.0943229	0.635244	0.921088	0.582155	0.924781	0.994481	0.887287
hsa-miR-2278-3p:Novel	No	No	3.38547	3.39713	2.77186	3.3519	3.4588	4.12404	0.038497	0.472146	0.433649	0.880623	0.110568	0.100918	0.976637	0.58437	0.490104
hsa-miR-2355-3p	No	No	2.13507	1.55381	1.44898	2.80564	1.88118	2.31943	-0.542246	-0.400478	0.141768	0.0915422	0.289622	0.687461	0.529907	0.773855	0.92789
hsa-miR-2355-5p	No	No	1.37614	0.936452	1.14222	1.49908	1.21614	1.35774	-0.352067	-0.0835555	0.268512	0.280155	0.824894	0.442033	NA	0.977782	0.821227
hsa-miR-2392	No	No	5.12087	5.48557	4.94498	5.67756	7.2814	5.20615	0.403137	-0.0425043	-0.445641	0.070174	0.875015	0.0645096	0.483561	0.984354	0.389505
hsa-miR-2392-5p:Novel	No	No	5.07821	4.56349	5.32625	4.89875	5.09226	5.42225	-0.0196954	0.0906442	0.11034	0.910458	0.658286	0.548674	0.981057	0.958512	0.880141
hsa-miR-23a-3p	No	No	7.85125	9.85332	2.7272	62.6003	56.5854	27.1114	0.235375	-1.50712	-1.74249	0.66549	0.0202361	0.00307796	0.927188	0.318291	0.0684116
hsa-miR-23a-5p	No	No	1.51834	1.2966	1.3636	2.13468	2.29245	1.53645	0.0917558	-0.3797	-0.471455	0.756866	0.304452	0.159024	0.945993	0.777375	0.589989
hsa-miR-23b-3p	No	Yes	2.24784	2.51615	2.21498	10.0036	14.9792	5.69391	0.958134	-1.15581	-2.11395	0.0709474	0.0708213	0.00026747	0.483561	0.51256	0.0138042
hsa-miR-23b-5p	No	No	2.13507	1.92704	2.459	2.62705	2.71072	2.70206	0.0370008	0.0344127	-0.00258801	0.888772	0.9124	0.992655	0.976637	0.993733	0.998791
hsa-miR-23c	No	No	1.27947	1.7552	1.22068	1.67244	2.15267	1.4036	0.336694	-0.263358	-0.600052	0.247788	0.471441	0.0646075	0.735254	0.893765	0.389505
hsa-miR-23c-5p:Novel	No	No	7.49024	9.38676	11.2984	8.94543	9.88169	11.2859	0.140298	0.409746	0.269447	0.455555	0.0635942	0.173276	0.863294	0.505032	0.605803
hsa-miR-24-1-5p	No	No	0	0.609508	0.666437	0.583948	1.086	0.96455	0.9756	0.620462	-0.355138	0.0338548	0.247948	0.429285	NA	0.746393	NA
hsa-miR-24-2-5p	No	No	5.14571	4.09945	3.74841	8.18924	5.74159	6.47343	-0.502093	-0.521018	-0.018925	0.094451	0.145228	0.954024	0.535746	0.639556	0.997578
hsa-miR-2467-3p	No	No	0.67847	0.899229	0.923954	0.996265	1.11244	1.13497	0.171471	-0.00841339	-0.179884	0.652284	0.98503	0.651225	NA	0.998523	0.917723
hsa-miR-2467-5p	No	No	3.92562	3.43987	4.17681	5.06434	5.49602	5.31811	0.106137	0.02887	-0.0772669	0.735856	0.938486	0.819155	0.939937	0.997645	0.971718
hsa-miR-25-5p	No	No	2.2227	2.33071	3.55867	2.96602	2.83365	3.46902	-0.115002	0.184578	0.29958	0.64435	0.525091	0.254127	0.924876	0.916964	0.685608
hsa-miR-2681-3p	No	No	1.69274	1.82852	1.7398	1.9486	1.85821	2.06616	-0.0642267	-0.013635	0.0505916	0.793715	0.962265	0.845125	0.956828	0.997645	0.978757
hsa-miR-2681-5p	No	No	2.2227	3.00037	1.84421	2.49406	3.28096	3.22487	0.386264	0.502793	0.11653	0.150114	0.110333	0.671751	0.629181	0.58437	0.925021
hsa-miR-2682-3p	No	No	1.37614	1.37595	1.4737	1.9575	1.72268	1.44066	-0.286995	-0.364561	-0.0775664	0.302151	0.284757	0.805866	0.78162	0.773855	0.970697
hsa-miR-2682-5p	No	No	2.90458	2.48441	2.15441	2.91664	2.52471	2.84551	-0.0999891	0.0462093	0.146198	0.646415	0.856029	0.524129	0.924881	0.982423	0.867376
hsa-miR-26a-1-3p	No	No	1.21782	0	0.777959	1.2851	0.771117	1.05656	-0.855024	-0.281894	0.573131	0.0197097	0.495103	0.151242	NA	0.908044	NA
hsa-miR-26a-2-3p	No	No	2.78924	2.43984	1.4737	3.37237	2.85994	1.94423	-0.23356	-0.753763	-0.520203	0.398091	0.0298092	0.105073	0.844676	0.375503	0.499921
hsa-miR-26b-3p	No	No	1.31438	1.82285	1.43165	2.27398	2.43901	1.89554	0.128329	-0.455196	-0.583525	0.703486	0.268109	0.117246	0.932322	0.761008	0.520427
hsa-miR-27b-5p	No	No	3.54887	3.28009	2.94741	4.10994	3.71495	3.62682	-0.173684	-0.108726	0.0649583	0.478447	0.710163	0.807835	0.876352	0.967389	0.971096
hsa-miR-28-3p	No	No	9.14658	7.33407	5.53746	18.5261	12.0901	8.52264	-0.483298	-1.21475	-0.731451	0.11933	0.00117442	0.0325681	0.579801	0.0587208	0.277106
hsa-miR-28-5p	No	No	3.53179	3.53179	3.16158	6.29237	5.506	4.46945	-0.143015	-0.500566	-0.357551	0.652516	0.190764	0.305572	0.927188	0.688872	0.722125
hsa-miR-2861	No	No	7.59169	8.27237	7.49981	9.86028	10.5845	9.29609	0.127814	-0.0995194	-0.227334	0.563879	0.707223	0.342523	0.897575	0.966559	0.752014
hsa-miR-2861-5p:Novel	No	No	5.61961	5.90371	5.70572	6.30579	6.11131	6.7287	-0.0576007	0.0468001	0.104401	0.71835	0.80257	0.536301	0.935784	0.977782	0.873023
hsa-miR-2909	No	No	9.98699	9.23749	9.54522	12.5452	11.0617	11.9986	-0.198971	-0.00269728	0.196273	0.345668	0.9914	0.388834	0.815768	0.999103	0.787517
hsa-miR-2909-3p:Novel	No	Yes	3.92562	5.54932	5.7111	6.77663	38.9365	33.2695	2.47859	2.29265	-0.185949	2.49239e-07	5.58529e-05	0.714835	0.000162242	0.00656006	0.935118
hsa-miR-296-3p	No	No	1.7659	1.57159	1.3137	1.89327	1.70789	2.27756	-0.12802	0.210169	0.338189	0.711487	0.598763	0.349859	0.935784	0.943798	0.756083
hsa-miR-296-5p	No	No	3.31386	2.65987	1.6139	4.14752	3.47099	2.27639	-0.1832	-0.89096	-0.70776	0.48595	0.00717348	0.0208367	0.877499	0.17662	0.216545
hsa-miR-297	No	No	1.96281	1.87735	2.0454	1.98248	2.41581	2.65787	0.248293	0.319849	0.0715555	0.398207	0.353161	0.813767	0.844676	0.809591	0.971096
hsa-miR-297-3p:Novel	No	No	0.624187	0	0	0.896634	0.773586	0.657349	-0.164636	-0.744201	-0.579565	0.686698	0.14583	0.218777	NA	0.640049	NA
hsa-miR-298	No	No	5.68751	7.59048	6.61449	9.64327	8.71135	7.89716	-0.134346	-0.207309	-0.0729623	0.552177	0.4438	0.767263	0.897021	0.87835	0.95448
hsa-miR-298-3p:Novel	No	No	2.90458	2.51615	3.69582	2.87195	3.00023	3.57414	-0.0387395	0.454648	0.493387	0.865095	0.0792489	0.0324266	0.975359	0.529271	0.277106
hsa-miR-299-3p	No	No	1.12392	0.813281	0.982468	1.58567	1.07402	1.5523	-0.663127	-0.15945	0.503677	0.0599224	0.69498	0.189989	NA	0.964014	0.623801
hsa-miR-299-5p	No	No	0.67847	0	0	1.05186	0.483817	0.429659	-1.16485	-0.883052	0.281794	0.0116268	0.111925	0.598836	NA	NA	NA
hsa-miR-29a-3p	No	No	3.38547	4.06641	3.28782	36.6	18.5107	10.6326	-0.723871	-1.97967	-1.2558	0.175968	0.00198483	0.0309729	0.663592	0.0796382	0.268697
hsa-miR-29a-5p	No	No	1.28022	1.26634	1.3636	1.9737	1.66405	1.91695	-0.0625003	-0.0849511	-0.0224507	0.848286	0.824064	0.94831	0.970101	0.977782	0.997578
hsa-miR-29b-1-5p	No	No	1.11135	1.37889	0.988996	1.16547	1.71755	1.20286	0.678672	0.131297	-0.547375	0.0364877	0.74242	0.107033	NA	0.9729	0.501877
hsa-miR-29b-2-5p	No	No	1.69274	2.05027	2.21498	2.35881	2.45995	2.68799	0.0386297	0.215531	0.176901	0.883267	0.484927	0.521021	0.976637	0.904195	0.86611
hsa-miR-29b-3p	No	No	9.93772	10.1075	9.30576	13.5558	12.6094	9.16227	-0.121639	-0.553057	-0.431418	0.597665	0.0473166	0.0896286	0.911614	0.452722	0.461012
hsa-miR-29c-3p	No	No	1.51834	1.23167	1.58079	2.46296	2.1808	2.01772	-0.152912	-0.430004	-0.277092	0.669648	0.321002	0.484731	0.929203	0.792147	0.84488
hsa-miR-29c-5p	No	No	5.88843	6.14917	5.33801	8.47692	8.58103	6.18637	0.0489351	-0.523462	-0.572397	0.858536	0.114983	0.0579455	0.971729	0.590527	0.369183
hsa-miR-300	No	No	2.90458	2.36148	3.55867	3.32545	3.13193	4.05415	-0.171187	0.147953	0.31914	0.486213	0.600752	0.214023	0.877499	0.943798	0.650401
hsa-miR-300-5p:Novel	No	No	2.65614	1.63885	1.93197	2.74506	2.05117	2.22893	-0.480819	-0.254388	0.22643	0.0754866	0.422986	0.445216	0.494982	0.864377	0.822269
hsa-miR-301a-3p	No	No	1.16183	1.02513	1.6139	1.67283	1.51575	2.36449	-0.164423	0.540032	0.704456	0.663083	0.210631	0.070831	0.927188	0.710064	0.413888
hsa-miR-301a-5p	No	No	6.88971	4.51338	5.53263	7.87312	5.74841	6.32803	-0.438209	-0.290255	0.147954	0.04143	0.254136	0.528917	0.391175	0.749331	0.870117
hsa-miR-301b-3p	No	No	1.4702	1.25372	1.4737	1.63918	1.2635	1.99741	-0.337644	0.328988	0.666632	0.25147	0.315711	0.0263372	NA	0.78983	0.243462
hsa-miR-301b-5p	No	No	2.65614	2.25669	2.76631	5.67626	3.71209	3.41454	-0.782665	-0.581339	0.201326	0.0119356	0.121512	0.564849	0.2043	0.607297	0.882186
hsa-miR-302a-3p	No	No	0.735102	0.813281	1.33287	0.937101	1.10472	1.41739	0.296091	0.628397	0.332306	0.439891	0.153423	0.383269	NA	0.651245	0.784842
hsa-miR-302a-5p	No	No	3.54223	2.5932	2.86331	4.21845	3.2569	3.69793	-0.357094	-0.0959235	0.261171	0.182013	0.760933	0.367791	0.672194	0.975745	0.773573
hsa-miR-302b-3p	No	No	1.06753	0.649043	0	0.963201	0.930526	0.890157	-0.157545	-0.0546941	0.102851	0.683586	0.904694	0.804345	NA	0.992324	NA
hsa-miR-302b-5p	No	No	1.72243	1.78874	1.22068	1.86499	2.21478	1.48302	0.246864	-0.300286	-0.54715	0.421797	0.436641	0.113869	0.846806	0.87835	0.5123
hsa-miR-302c-3p	No	No	0	0	0	0.583318	0.650471	0.560137	-0.106916	-0.183528	-0.0766118	0.818854	0.741389	0.878734	NA	NA	NA
hsa-miR-302c-5p	No	No	0.67847	0	0.681801	0.922338	1.38376	0.89819	0.430193	0.012778	-0.417415	0.429067	0.984509	0.476027	NA	0.998523	0.838698
hsa-miR-302d-3p	No	No	0.640108	0	0	0.910272	0.551138	0.347102	-0.719615	-1.17302	-0.453401	0.101765	0.0346307	0.390768	NA	NA	NA
hsa-miR-302d-5p	No	No	1.39919	1.74018	2.15441	1.87875	2.06683	2.08411	0.308116	0.219813	-0.0883038	0.39169	0.607162	0.816019	0.843465	0.944254	0.971096
hsa-miR-302e	No	No	2.79838	2.45827	2.15441	3.39069	3.03745	2.79589	-0.233055	-0.266289	-0.0332345	0.295907	0.32164	0.893027	0.773071	0.793118	0.990987
hsa-miR-302e-3p:Novel	No	No	1.37199	1.17726	1.10749	1.71284	1.64538	1.28916	-0.168435	-0.397806	-0.229371	0.629885	0.347062	0.554687	0.924781	0.806301	0.880735
hsa-miR-302f	No	No	0	0	0	0.481059	0.734611	0.339322	0.454534	-0.353173	-0.807707	0.426945	0.612755	0.193044	NA	NA	NA
hsa-miR-302f-5p:Novel	No	No	1.72243	1.2422	2.13965	1.88681	1.50156	2.42401	-0.403813	0.339018	0.74283	0.165281	0.300732	0.0138053	0.646005	0.773855	0.173024
hsa-miR-3059-3p	No	No	1.39462	2.19791	2.49894	4.1128	5.70347	3.23267	0.461934	-0.120258	-0.582192	0.225077	0.794627	0.160996	0.71846	0.977716	0.59255
hsa-miR-3059-5p	No	No	2.09193	1.81958	1.84421	2.13191	2.05719	2.16358	-0.0197019	-0.157775	-0.138073	0.940631	0.617258	0.628422	0.985412	0.94684	0.90915
hsa-miR-3064-3p	No	No	0	0	0	0.311949	0.302068	0.512464	-0.0542238	0.395464	0.449688	0.914777	0.499343	0.387873	NA	NA	NA
hsa-miR-3064-5p	No	No	1.37614	1.55381	1.96494	1.56186	1.57886	1.7827	-0.0251579	0.251651	0.276809	0.929197	0.444012	0.344025	0.982891	0.87835	0.752014
hsa-miR-3065-3p	No	No	1.72243	1.59592	2.41496	2.27702	1.97845	2.5608	-0.155126	0.148126	0.303251	0.527543	0.596515	0.229864	0.891891	0.943798	0.661455
hsa-miR-3065-5p	No	No	2.62876	1.94713	1.58079	3.48752	2.31781	1.66581	-0.599678	-1.05603	-0.45635	0.0260692	0.00215854	0.161759	0.309915	0.0835149	0.592728
hsa-miR-3074-3p	No	No	1.37614	1.39214	1.24947	1.9319	2.28943	1.84231	0.148281	-0.179007	-0.327288	0.663393	0.662864	0.375991	0.927188	0.959784	0.781092
hsa-miR-3074-5p	No	No	3.12093	3.64569	3.30724	5.53967	5.24651	5.30439	-0.0419366	0.22953	0.271466	0.899325	0.559972	0.446411	0.977649	0.929432	0.823447
hsa-miR-3085-3p	No	No	2.32366	2.12789	1.6139	2.70599	2.38064	2.50998	-0.18023	-0.134106	0.0461241	0.512547	0.682883	0.877813	0.88421	0.962808	0.990987
hsa-miR-3085-5p	No	No	2.275	2.05027	1.6139	2.91212	2.6688	1.96222	-0.223379	-0.531517	-0.308138	0.376627	0.0877171	0.283848	0.830884	0.539925	0.707296
hsa-miR-30a-3p	No	No	2.55895	2.12599	1.55592	4.81655	3.67166	2.28845	-0.269691	-1.12377	-0.854079	0.40921	0.00562352	0.0225452	0.845168	0.148916	0.225082
hsa-miR-30a-5p	No	No	12.2249	11.7726	10.1135	16.4082	13.5356	12.3478	-0.303421	-0.394779	-0.0913574	0.175286	0.140835	0.708894	0.663592	0.637962	0.933113
hsa-miR-30b-3p	No	No	2.36148	1.7521	1.6139	2.49399	2.24876	2.34916	-0.138557	-0.0375727	0.100984	0.617183	0.908575	0.734384	0.916871	0.992905	0.940827
hsa-miR-30b-5p	No	No	2.56043	3.4309	2.459	15.9105	10.7164	7.08707	-0.241994	-1.45494	-1.21295	0.628637	0.0154745	0.0265723	0.924781	0.280961	0.243462
hsa-miR-30c-1-3p	No	No	1.18074	1.10138	1.7398	1.34803	1.26633	1.76473	-0.0149844	0.335512	0.350496	0.96143	0.336611	0.256221	NA	0.805028	0.686186
hsa-miR-30c-2-3p	No	No	3.33405	3.10102	2.33388	3.27819	3.47824	3.11161	0.0110894	-0.221536	-0.232625	0.960054	0.408941	0.337623	0.990103	0.85593	0.748093
hsa-miR-30d-3p	No	No	1.7659	1.26634	0.988996	1.96198	1.34503	1.40539	-0.505378	-0.415021	0.0903574	0.0956926	0.252849	0.791211	NA	0.748415	0.962027
hsa-miR-30d-5p	No	Yes	4.4454	5.69297	3.74841	56.9251	19.7655	9.549	-1.32813	-2.71599	-1.38786	0.0093059	9.23522e-06	0.0128148	0.185836	0.0018759	0.168194
hsa-miR-30e-3p	No	Yes	12.421	14.78	10.7721	55.0223	28.1238	20.2899	-0.801185	-1.62739	-0.826203	0.0408285	0.000505453	0.0521955	0.389942	0.033525	0.349597
hsa-miR-31-3p	No	No	2.20531	1.37889	1.39227	3.13466	1.75268	1.73896	-0.671849	-0.821714	-0.149865	0.0400332	0.0376812	0.687221	0.385137	0.416544	0.92789
hsa-miR-31-5p	No	No	4.41061	4.81582	4.40966	5.93715	7.12033	5.82955	0.255427	-0.143296	-0.398723	0.302546	0.630764	0.137384	0.781873	0.951251	0.548274
hsa-miR-3115	No	No	4.07082	3.5042	3.11183	4.61572	3.67978	3.23881	-0.28471	-0.477577	-0.192868	0.146103	0.0470561	0.387059	0.629181	0.452722	0.785731
hsa-miR-3115-3p:Novel	No	No	0.882948	0	0	1.28106	0.863849	1.03822	-0.629001	0.0177541	0.646755	0.164643	0.973088	0.187494	NA	0.997645	0.621916
hsa-miR-3116	No	No	0.65719	1.00012	0.923954	0.92246	1.28459	1.40539	0.335954	0.307648	-0.028306	0.3655	0.469391	0.938672	NA	0.89347	0.996608
hsa-miR-3116-5p:Novel	No	Yes	1.77444	1.82834	2.44135	1.95906	2.2132	6.72711	0.213372	1.76728	1.55391	0.562416	1.54106e-05	1.45919e-05	0.897021	0.00250422	0.00153214
hsa-miR-3117-3p	No	No	8.39513	7.06359	8.61765	11.8357	8.29103	9.20893	-0.535932	-0.419977	0.115954	0.0253073	0.140697	0.657962	0.305206	0.637962	0.922712
hsa-miR-3117-5p	No	No	0	0	0	0.367646	0.54028	0.485444	0.432092	0.398558	-0.033534	0.399998	0.509097	0.949569	NA	NA	NA
hsa-miR-3118	No	No	5.88081	4.39583	4.34693	6.52342	6.59123	4.89625	-0.0217946	-0.489505	-0.46771	0.933608	0.122689	0.105402	0.984781	0.609692	0.499921
hsa-miR-3118-1-5p:Novel, hsa-miR-3118-2-5p:Novel, hsa-miR-3118-3-5p:Novel, hsa-miR-3118-4-5p:Novel	No	No	11.1135	10.7908	8.14954	17.0854	13.4989	16.5501	-0.332967	0.0712044	0.404172	0.223778	0.826206	0.170626	0.717201	0.977782	0.602424
hsa-miR-3120-3p	No	No	1.27947	1.18074	1.58079	2.82636	1.4711	1.48325	-0.816904	-0.712987	0.103916	0.0129538	0.0734022	0.784377	0.216116	0.515242	0.958982
hsa-miR-3120-5p	No	No	1.69274	1.82834	2.20483	1.97927	2.44163	2.6231	0.407526	0.482423	0.0748968	0.194837	0.184777	0.81335	0.680987	0.683343	0.971096
hsa-miR-3121-3p	No	No	1.65693	1.59592	1.42643	1.91092	2.26525	1.4791	0.284435	-0.357471	-0.641905	0.35149	0.350037	0.0610408	0.817059	0.806807	0.377136
hsa-miR-3121-5p	No	No	1.37614	1.18177	1.09594	1.71673	1.69159	1.70605	0.0262293	-0.0997826	-0.126012	0.93749	0.802229	0.726024	0.985412	0.977782	0.939647
hsa-miR-3122	No	No	6.4052	5.54249	6.56851	6.97734	6.01898	7.29443	-0.275232	0.0951907	0.370423	0.10418	0.627714	0.0392777	0.557034	0.9503	0.307448
hsa-miR-3122-3p:Novel	No	No	2.20838	2.33071	1.96494	2.63398	2.56938	2.18111	-0.106768	-0.296585	-0.189817	0.693179	0.365283	0.525651	0.929409	0.820717	0.869423
hsa-miR-3123	No	No	1.12392	0.948667	1.10749	1.53822	1.10423	1.28413	-0.209638	-0.24233	-0.0326919	0.507533	0.522057	0.925019	NA	0.916964	0.995573
hsa-miR-3123-5p:Novel	No	No	4.11596	3.88979	3.92987	4.25762	4.61591	4.0616	0.00703974	0.0197431	0.0127034	0.972115	0.934394	0.953069	0.992699	0.995339	0.997578
hsa-miR-3124-3p	No	No	0.809179	0	0.715827	0.753382	0.731263	0.77159	-0.232768	0.109235	0.342003	0.550552	0.807767	0.399764	NA	0.977782	NA
hsa-miR-3124-5p	No	No	1.61836	1.62656	1.6139	2.44806	1.94157	1.64723	-0.457596	-0.459652	-0.00205598	0.0949821	0.168707	0.994756	0.535746	0.665408	0.998851
hsa-miR-3126-3p	No	No	0.882948	0.324522	0.491234	0.895096	0.622452	0.795449	-0.472861	0.079964	0.552825	0.235389	0.860807	0.18965	NA	NA	NA
hsa-miR-3126-5p	No	No	0.809179	1.01164	1.24947	0.889708	1.17575	1.82334	0.0466945	0.936115	0.889421	0.900932	0.0234418	0.0135699	NA	0.337105	0.172497
hsa-miR-3127-3p	No	No	0.766557	1.09896	0.988996	1.07201	1.23928	1.14634	0.129613	0.0816081	-0.0480048	0.717974	0.848132	0.899032	NA	0.982423	0.993228
hsa-miR-3127-5p	No	No	3.31386	2.75604	2.45617	3.79807	3.0718	3.19758	-0.293112	-0.268221	0.0248913	0.241173	0.367319	0.927644	0.734725	0.821075	0.995573
hsa-miR-3128	No	No	4.19756	3.48036	2.89795	4.70714	4.19997	3.92303	-0.185083	-0.238024	-0.0529405	0.453537	0.423739	0.845772	0.860865	0.865044	0.978858
hsa-miR-3128-3p:Novel	No	No	1.96281	1.7521	1.4737	5.55967	3.12483	1.91573	-0.861981	-1.47503	-0.613053	0.0313322	0.00291758	0.183531	0.338491	0.0996535	0.617629
hsa-miR-3129-3p	No	No	1.18074	0.399663	0.461052	1.14414	0.85076	1.06548	-0.504747	-0.29829	0.206457	0.167035	0.488388	0.609691	NA	0.905433	NA
hsa-miR-3129-5p	No	No	2.55895	2.43984	2.41496	2.69972	2.79038	3.82315	-0.0498913	0.405332	0.455224	0.842371	0.153937	0.0737011	0.967955	0.651245	0.421283
hsa-miR-3130-3p	No	No	0.828465	0.531973	0.777959	1.12954	0.942807	1.10983	-0.113871	-0.243029	-0.129158	0.754128	0.569781	0.739397	NA	0.932191	0.943219
hsa-miR-3130-5p	No	No	1.39919	1.82285	1.55592	1.79241	1.79732	1.91634	0.0150561	0.0402184	0.0251623	0.958112	0.906036	0.934288	0.990076	0.992487	0.996116
hsa-miR-3131	No	No	3.03668	2.61931	3.42666	4.68236	3.10448	3.5562	-0.697965	-0.385628	0.312337	0.0101656	0.229094	0.297688	0.186575	0.729392	0.716004
hsa-miR-3131-3p:Novel	No	No	0.985213	0.776904	0.713215	1.24958	0.98161	0.914331	-0.351977	-0.542216	-0.190239	0.347134	0.230369	0.651598	NA	0.730438	0.917723
hsa-miR-3132	No	No	5.94527	4.77063	5.56908	6.47712	5.11219	6.82321	-0.393267	0.0644593	0.457727	0.0231824	0.74382	0.01201	0.290994	0.9729	0.162535
hsa-miR-3132-3p:Novel	No	No	2.03541	1.09336	1.10241	2.35688	2.5859	1.34869	0.0506138	-1.0073	-1.05792	0.897184	0.0427971	0.0203138	0.976637	0.444379	0.214033
hsa-miR-3133	No	No	11.0419	11.0014	12.295	12.746	13.0778	16.7258	0.0296938	0.311841	0.282147	0.881184	0.181136	0.180246	0.976637	0.679938	0.614614
hsa-miR-3133-3p:Novel	No	Yes	5.50454	5.5928	6.81801	6.06423	6.08619	19.096	-0.0219861	1.25406	1.27604	0.939956	0.000173248	2.15963e-05	0.985412	0.0152177	0.00187888
hsa-miR-3134	No	No	3.94314	3.27769	2.459	4.18857	3.43828	3.30561	-0.273038	-0.301318	-0.02828	0.306616	0.346679	0.923398	0.786811	0.806301	0.995573
hsa-miR-3134-5p:Novel	No	No	3.37176	2.36353	2.66575	3.85365	3.42762	2.9558	-0.136064	-0.340437	-0.204373	0.552912	0.222555	0.423723	0.897021	0.722364	0.815389
hsa-miR-3135a	No	No	12.5927	13.4092	12.0748	15.4357	15.0272	14.6965	-0.0409557	-0.0590372	-0.0180815	0.802832	0.76252	0.91874	0.957153	0.975745	0.995573
hsa-miR-3135b	No	No	4.19756	4.04655	4.42111	4.39555	4.43963	4.80526	0.0180412	0.0702092	0.052168	0.923783	0.750848	0.792375	0.982695	0.9729	0.962418
hsa-miR-3136-3p	No	No	0	0.615833	0	0.49954	0.698356	0.469982	0.444711	-0.122082	-0.566794	0.313482	0.820512	0.224188	NA	NA	NA
hsa-miR-3136-5p	No	No	5.57847	4.04655	4.91234	5.50428	6.35845	5.49465	0.20572	0.0216468	-0.184073	0.424953	0.943977	0.506528	0.848314	0.997645	0.859742
hsa-miR-3137	No	No	2.32366	3.03492	3.28782	3.8045	3.13169	3.54879	-0.320318	0.00425268	0.324571	0.187176	0.988132	0.216666	0.677003	0.998956	0.650753
hsa-miR-3138	No	No	9.7426	9.83308	9.99575	10.0577	10.4333	10.4536	0.109896	0.025297	-0.0845987	0.50853	0.898037	0.633873	0.881495	0.991871	0.910854
hsa-miR-3138-5p:Novel	No	No	2.95564	3.76795	2.96699	3.83226	3.96996	3.24881	0.0228615	-0.351002	-0.373863	0.917975	0.195877	0.128999	0.982695	0.694861	0.535299
hsa-miR-3139	No	No	4.19756	3.695	4.42996	4.54666	4.21614	4.90347	-0.0781119	0.112129	0.190241	0.683586	0.614713	0.343736	0.929346	0.946164	0.752014
hsa-miR-3139-3p:Novel	No	No	1.39919	1.28469	2.76631	1.61992	1.69785	2.80011	0.12778	0.823967	0.696187	0.658008	0.00958137	0.0115826	0.927188	0.214233	0.159406
hsa-miR-3140-3p	No	No	2.49675	4.04655	3.11183	5.19519	6.47059	5.03808	0.378216	-0.168657	-0.546872	0.228518	0.654468	0.106993	0.723941	0.957069	0.501877
hsa-miR-3140-5p	No	No	2.78924	2.04972	1.84791	2.78949	3.35259	2.96743	0.306211	0.17823	-0.127981	0.388226	0.676133	0.73746	0.842299	0.962434	0.942723
hsa-miR-3141	No	No	2.94041	2.78429	2.78454	3.38758	3.36252	3.20928	0.00342265	-0.0474227	-0.0508453	0.988691	0.869546	0.845338	0.996572	0.983309	0.978757
hsa-miR-3141-3p:Novel	No	No	1.31438	0.776904	1.09594	1.44996	1.0258	1.00405	-0.440446	-0.24741	0.193036	0.182582	0.531224	0.601215	NA	0.9204	0.896298
hsa-miR-3142	No	No	1.28022	1.5181	1.39227	1.82456	1.77638	1.50889	-0.0727223	-0.0716471	0.00107522	0.799375	0.834827	0.99724	0.956828	0.979381	0.998851
hsa-miR-3142-5p:Novel	No	No	4.74929	4.19646	4.66775	4.78002	5.19497	5.26028	0.154767	0.00808139	-0.146686	0.416444	0.971302	0.463982	0.845168	0.997645	0.834927
hsa-miR-3143	No	No	2.2227	2.79764	2.6097	2.7781	3.78447	4.6129	0.440634	0.586336	0.145702	0.100097	0.0567422	0.587353	0.547419	0.490458	0.891252
hsa-miR-3143-3p:Novel	No	No	2.20531	1.87735	1.77934	2.19681	2.00296	3.12233	0.0113043	0.475492	0.464187	0.967945	0.132367	0.0984657	0.992417	0.626739	0.488319
hsa-miR-3144-3p	No	No	0.861214	1.07483	0.982468	1.26066	0.994157	0.906384	-0.443951	-0.476579	-0.0326278	0.181009	0.237881	0.931508	NA	0.740677	0.995942
hsa-miR-3144-5p	No	No	2.09193	1.23167	1.33287	2.14635	1.72981	1.56226	-0.367315	-0.618351	-0.251036	0.18532	0.0726992	0.436311	0.675661	0.514295	0.818516
hsa-miR-3145-3p	No	No	6.4052	5.71816	6.50987	6.6133	6.53484	6.93816	-0.02757	0.0262757	0.0538457	0.879995	0.902386	0.780848	0.976637	0.991871	0.957585
hsa-miR-3145-5p	No	No	1.96281	1.57159	1.10749	2.69026	1.89175	1.80176	-0.44651	-0.742702	-0.296192	0.125659	0.0366983	0.374139	0.593808	0.411745	0.779777
hsa-miR-3146	No	No	2.275	3.10762	2.15441	2.95434	3.10122	3.19776	-0.0234058	0.102844	0.126249	0.92137	0.713821	0.616814	0.982695	0.967889	0.90168
hsa-miR-3146-5p:Novel	No	No	9.6078	7.50941	8.74628	11.0263	9.12968	8.59622	-0.229124	-0.357157	-0.128033	0.244775	0.129625	0.552634	0.734725	0.6232	0.880283
hsa-miR-3147	No	No	1.51834	2.18673	1.84791	2.31729	2.53842	2.63171	0.111919	-0.143528	-0.255447	0.714728	0.692521	0.434488	0.935784	0.962808	0.818516
hsa-miR-3147-3p:Novel	No	No	1.18074	0.911424	0.715827	1.59432	1.45428	0.991272	-0.0977292	-0.618939	-0.521209	0.778644	0.161663	0.199802	NA	0.659228	0.634114
hsa-miR-3148	No	No	5.50454	4.87607	6.11215	5.81332	6.18601	6.63621	0.0374723	0.301463	0.263991	0.85787	0.219462	0.231216	0.971729	0.718612	0.663576
hsa-miR-3148-3p:Novel	No	No	2.65614	2.55199	1.97799	3.17228	2.68545	2.48377	-0.20369	-0.208613	-0.00492298	0.406489	0.479071	0.985463	0.845168	0.900478	0.99842
hsa-miR-3149	No	No	5.61768	6.60826	5.56908	6.10138	6.85312	6.8545	0.151466	0.12109	-0.0303753	0.474355	0.629245	0.892635	0.873184	0.9503	0.990987
hsa-miR-3150a-3p	No	No	1.12392	1.74018	1.97799	1.36193	1.98043	2.34769	0.488354	0.588316	0.0999626	0.105829	0.086404	0.730179	0.558701	0.539358	0.940705
hsa-miR-3150a-5p	No	No	2.24784	2.7519	2.6097	2.87322	3.19946	3.15817	0.14989	-0.0647433	-0.214633	0.558573	0.83206	0.432134	0.897021	0.979381	0.817296
hsa-miR-3150b-3p	No	No	3.33405	3.18042	3.23384	4.05499	3.57238	3.58823	-0.267624	-0.171107	0.0965171	0.259504	0.544648	0.709909	0.741923	0.9204	0.933335
hsa-miR-3150b-5p	No	No	2.275	1.87735	1.3636	3.01421	2.17459	2.00477	-0.440396	-0.473727	-0.0333307	0.128896	0.173948	0.918164	0.597135	0.672216	0.995573
hsa-miR-3151-3p	No	No	0	0	0	0.436368	0.581568	0.446918	0.355413	-0.0920167	-0.44743	0.467879	0.876202	0.389926	NA	NA	NA
hsa-miR-3151-5p	No	No	0	0	0	0.613465	0.664743	0.565498	-0.0502805	-0.115334	-0.065054	0.917666	0.842232	0.90079	NA	NA	NA
hsa-miR-3152-3p	No	No	1.11135	1.37802	0.988996	1.34662	1.55082	1.30056	0.254438	-0.0661833	-0.320622	0.395771	0.855066	0.312384	NA	0.982423	0.722522
hsa-miR-3152-5p	No	No	1.18074	1.02513	0.777959	1.44609	1.50651	1.0292	-0.0761422	-0.641369	-0.565227	0.826393	0.142288	0.159066	NA	0.638638	0.589989
hsa-miR-3153-5p:Novel	No	No	2.03541	2.43803	2.13965	2.5541	2.52824	2.85745	-0.0857538	0.127242	0.212996	0.714438	0.64517	0.391986	0.935784	0.956521	0.788895
hsa-miR-3154	No	No	2.20531	1.78874	2.30989	2.72991	2.08783	3.16084	-0.304757	0.139952	0.444709	0.270487	0.659713	0.126872	0.753703	0.958899	0.535195
hsa-miR-3154-5p:Novel	No	No	4.55502	4.13666	4.17681	6.43397	5.37575	4.53336	-0.353808	-0.483307	-0.1295	0.124555	0.0827714	0.614334	0.590517	0.532537	0.901199
hsa-miR-3155a	No	No	2.28664	2.06735	2.13965	2.51204	2.56532	2.56189	-0.0519676	-0.00944546	0.0425221	0.835829	0.974473	0.873229	0.96623	0.997752	0.989309
hsa-miR-3155a-5p:Novel	No	No	2.275	2.06392	2.459	2.39832	3.23862	2.52981	0.40065	0.080152	-0.320498	0.178163	0.822007	0.309245	0.666748	0.977782	0.722522
hsa-miR-3155b	No	No	0	0	0	0.627312	0.883439	0.610202	0.426387	-0.169816	-0.596203	0.347213	0.757705	0.217337	NA	0.975105	NA
hsa-miR-3155b-5p:Novel	No	No	1.31438	1.18177	1.38316	1.57697	2.37309	1.60744	0.559631	-0.129153	-0.688784	0.138065	0.776752	0.0873845	0.616894	0.976845	0.451862
hsa-miR-3156-3p	No	No	11.3026	12.0015	11.4222	11.5518	12.2968	12.515	0.0761629	0.157491	0.0813278	0.58509	0.338135	0.581404	0.904849	0.805047	0.887287
hsa-miR-3157-3p	No	No	2.20531	2.36148	1.6139	2.98557	2.71883	2.57514	-0.118245	-0.171106	-0.0528603	0.685048	0.621838	0.867179	0.929346	0.949503	0.986491
hsa-miR-3157-5p	No	No	0.735102	0.523862	0.461052	1.84756	1.11156	0.976117	-0.765334	-0.859514	-0.0941802	0.0789207	0.101931	0.849258	NA	0.570184	0.981114
hsa-miR-3158-3p	No	No	1.35694	1.39214	1.24947	1.71754	1.76663	1.45351	-0.0389593	-0.191223	-0.152263	0.895539	0.590573	0.636204	0.976637	0.941911	0.911432
hsa-miR-3158-5p	No	No	2.13507	1.81958	1.58079	2.58614	2.2934	1.81089	-0.152501	-0.66043	-0.507929	0.544355	0.0365251	0.0815722	0.896518	0.411745	0.444198
hsa-miR-3159	No	No	7.6813	9.745	7.69348	8.36313	10.2254	7.89666	0.316042	-0.0967834	-0.412826	0.0598415	0.634412	0.0230949	0.469142	0.951852	0.229068
hsa-miR-3160-3p	No	No	7.66557	7.19383	7.3308	7.58652	8.15739	8.52144	0.164759	0.241584	0.0768256	0.408724	0.30497	0.715876	0.845168	0.777375	0.935118
hsa-miR-3160-5p	No	No	8.25681	8.59867	7.7169	8.49451	9.97239	8.78054	0.239897	0.128471	-0.111427	0.178839	0.545532	0.55766	0.666748	0.920549	0.880735
hsa-miR-3161	No	No	4.2935	4.96881	4.66506	4.76482	5.34205	4.68275	0.174362	1.38409e-05	-0.174348	0.297636	0.999945	0.328372	0.7745	0.999945	0.736299
hsa-miR-3161-3p:Novel	No	No	1.61836	1.82834	1.6139	1.78718	1.75322	1.7941	-0.00500771	0.0268977	0.0319054	0.984646	0.929787	0.906804	0.996572	0.994924	0.993228
hsa-miR-3162-3p	No	No	1.11135	1.3982	1.24947	1.39494	1.56088	1.30347	0.0557238	-0.0980816	-0.153805	0.856697	0.790119	0.641207	NA	0.97765	0.912798
hsa-miR-3162-5p	No	Yes	3.94314	1.95578	3.11183	11.9454	3.11742	4.16206	-1.90778	-1.45277	0.455014	1.50345e-07	0.000771178	0.263319	0.000158873	0.0432126	0.692774
hsa-miR-3163	No	No	3.83842	3.25313	2.36722	5.12931	4.85941	3.09896	-0.0387782	-0.835976	-0.797198	0.883166	0.0110395	0.00819325	0.976637	0.234556	0.13062
hsa-miR-3163-3p:Novel	No	No	1.61836	1.79846	1.43165	1.3324	1.86402	1.7223	0.472535	0.213181	-0.259354	0.105396	0.539377	0.38176	0.558701	0.9204	0.784842
hsa-miR-3164	No	No	6.97098	5.26561	6.22367	6.98549	6.23619	6.64396	-0.187629	-0.0911186	0.0965103	0.256905	0.642634	0.590593	0.73905	0.956297	0.891252
hsa-miR-3164-3p:Novel	No	Yes	2.20838	2.39798	2.28444	2.37798	7.94376	2.28636	1.55776	0.0597308	-1.49803	0.000274112	0.909426	0.00121565	0.0277908	0.993157	0.0355929
hsa-miR-3165	No	No	11.7769	11.1798	12.5304	16.8587	16.3997	13.4855	-0.0232299	-0.311545	-0.288315	0.920327	0.262803	0.253778	0.982695	0.757417	0.685608
hsa-miR-3165-3p:Novel	No	No	1.53311	1.74018	2.33388	2.34215	1.91009	2.44321	-0.268218	0.0738042	0.342022	0.27239	0.790682	0.178501	0.753744	0.97765	0.613552
hsa-miR-3166	No	No	1.06753	1.04772	1.6139	1.49286	1.3079	1.85082	-0.234486	0.312589	0.547076	0.441173	0.362006	0.0785646	NA	0.816391	0.434173
hsa-miR-3166-5p:Novel	No	No	3.12093	2.20275	3.30724	3.46396	2.98604	3.84765	-0.0866027	0.190811	0.277414	0.729358	0.512762	0.292254	0.938306	0.913017	0.7125
hsa-miR-3167	No	No	6.13246	4.93273	5.99793	6.69818	6.56619	5.30722	-0.0641024	-0.407701	-0.343599	0.752968	0.0986226	0.127103	0.944715	0.567361	0.535195
hsa-miR-3167-5p:Novel	No	No	13.4871	12.3318	12.4484	14.8371	13.2577	14.5356	-0.138322	0.0436858	0.182007	0.410352	0.825889	0.313262	0.845168	0.977782	0.722522
hsa-miR-3168-3p:Novel	No	No	4.41061	4.55429	4.40966	4.42721	4.83295	6.16849	0.127217	0.461427	0.33421	0.569229	0.0760725	0.148944	0.900429	0.519157	0.569437
hsa-miR-3169	No	Yes	7.06359	6.06983	10.1869	7.5636	6.92939	10.3051	-0.105211	0.506787	0.611998	0.546476	0.0108621	0.000636399	0.896518	0.233786	0.024844
hsa-miR-3169-3p:Novel	No	No	9.63295	10.1164	9.3355	15.7742	12.9038	9.56388	-0.300036	-0.673604	-0.373568	0.208302	0.0192791	0.155657	0.692413	0.309688	0.582996
hsa-miR-3170	No	No	4.41061	4.1946	4.17681	4.82101	4.35639	4.53536	-0.2447	-0.150008	0.0946914	0.189863	0.496211	0.639932	0.680975	0.908044	0.911432
hsa-miR-3170-3p:Novel	No	No	2.28664	2.35453	1.77934	2.30337	2.75915	1.80888	0.230973	-0.191262	-0.422235	0.35441	0.540054	0.128906	0.818061	0.9204	0.535299
hsa-miR-3171	No	No	4.23848	3.24522	3.4796	5.20307	3.92331	4.49769	-0.423585	-0.225892	0.197693	0.0864749	0.437282	0.46155	0.513875	0.87835	0.832719
hsa-miR-3171-3p:Novel	No	No	1.35694	1.26634	1.43165	2.02636	1.4553	1.47147	-0.345882	-0.357304	-0.0114221	0.252424	0.322468	0.972827	0.735254	0.793444	0.997578
hsa-miR-3173-3p	No	No	1.53311	1.85973	1.97799	2.06592	2.3927	2.00571	0.110429	-0.0746574	-0.185086	0.689826	0.822401	0.534199	0.929346	0.977782	0.871723
hsa-miR-3173-5p	No	No	3.31386	3.54223	4.29496	3.36191	4.21871	5.25467	0.322584	0.620879	0.298295	0.239327	0.0506049	0.28755	0.733987	0.460689	0.711283
hsa-miR-3174	No	No	3.54223	4.17643	4.14264	8.21967	9.74475	11.7737	0.2237	0.408656	0.184956	0.562715	0.371806	0.654542	0.897021	0.822797	0.920166
hsa-miR-3174-3p:Novel	No	No	2.275	1.7521	1.39227	2.72847	2.53148	2.16849	-0.198329	-0.346276	-0.147947	0.475689	0.299885	0.629589	0.874269	0.773855	0.90915
hsa-miR-3175	No	No	2.95564	3.2245	3.57914	3.40181	3.31142	3.69924	-0.0174211	0.0855764	0.102998	0.932209	0.720925	0.631426	0.984028	0.967889	0.910797
hsa-miR-3175-3p:Novel	No	No	1.11135	1.2966	1.55592	1.34048	1.8013	1.60286	0.340575	0.378477	0.0379021	0.281405	0.308197	0.906048	0.759415	0.781922	0.993228
hsa-miR-3176	No	No	8.82948	7.56772	7.32405	12.2609	24.945	11.2645	0.9963	-0.111604	-1.1079	0.00796255	0.803944	0.00629469	0.172043	0.977782	0.106002
hsa-miR-3176-5p:Novel	No	No	5.52095	7.37481	6.50987	7.08402	8.34095	7.13626	0.29314	-0.0250667	-0.318206	0.177604	0.923556	0.174479	0.666748	0.994483	0.605803
hsa-miR-3177-3p	No	No	0.65719	1.063	0.869901	0.896826	1.20287	1.27081	0.393498	0.464891	0.0713929	0.31249	0.300101	0.853283	NA	0.773855	0.981448
hsa-miR-3177-5p	No	No	7.96251	5.99494	6.46324	10.788	11.2279	9.51732	-0.0121376	-0.0842585	-0.0721209	0.970724	0.830999	0.840345	0.992563	0.979381	0.977743
hsa-miR-3178	No	No	10.7338	10.5126	9.70152	12.6089	16.5674	15.5542	0.340262	0.318097	-0.0221645	0.192719	0.305636	0.936857	0.680975	0.777853	0.996303
hsa-miR-3178-3p:Novel	No	No	1.35694	1.28469	1.7398	1.61908	1.63105	1.9394	-0.0422289	0.214648	0.256877	0.888377	0.534833	0.406311	0.976637	0.9204	0.80391
hsa-miR-3179	No	No	3.54887	3.4309	4.30883	6.48622	5.28846	8.36732	-0.32499	0.397138	0.722127	0.31609	0.298278	0.0378032	0.791305	0.773855	0.301137
hsa-miR-3179-5p:Novel	No	No	3.48655	2.60771	3.92987	3.87263	3.12692	4.46226	-0.357066	0.216377	0.573444	0.108656	0.392401	0.0136603	0.562753	0.84372	0.172595
hsa-miR-3180	No	Yes	6.13246	6.51927	7.32405	8.77886	31.2998	7.29062	1.82042	-0.329348	-2.14977	7.34749e-06	0.501091	1.05637e-06	0.00164535	0.911072	0.000485207
hsa-miR-3180-3p	No	No	3.06623	2.06392	1.6139	3.79225	3.19714	2.31453	-0.205041	-0.683872	-0.478832	0.495619	0.0642574	0.159074	0.877802	0.505032	0.589989
hsa-miR-3180-4-3p:Novel, hsa-miR-3180-5-3p:Novel	No	No	8.95632	9.54125	10.7721	9.52199	13.9861	10.9536	0.482493	0.337056	-0.145437	0.0250396	0.190528	0.526776	0.305206	0.688782	0.869855
hsa-miR-3180-5p	No	No	8.43213	8.2557	9.82468	11.3842	11.4076	9.08994	-0.0276552	-0.378169	-0.350514	0.895257	0.135632	0.128351	0.976637	0.631764	0.535299
hsa-miR-3181-3p:Novel	No	No	1.11135	1.09336	1.55592	1.14368	1.37101	1.35381	0.0466089	0.08874	0.0421311	0.886708	0.816525	0.901395	NA	0.977782	0.993228
hsa-miR-3182	No	No	7.28261	8.3818	8.76753	7.92331	10.7573	9.39355	0.465043	0.183959	-0.281084	0.0436683	0.502059	0.251218	0.401079	0.911072	0.685549
hsa-miR-3182-3p:Novel	No	Yes	1.39919	1.81958	2.49894	1.9958	2.53205	4.83143	0.324528	1.45714	1.13261	0.355068	0.000249088	0.00109331	0.818146	0.0188264	0.0332914
hsa-miR-3183	No	No	2.2227	1.7521	2.28444	3.21655	2.24823	3.22165	-0.386093	-0.0190487	0.367045	0.151306	0.951042	0.200016	0.629181	0.997645	0.634114
hsa-miR-3183-3p:Novel	No	No	1.69274	2.06735	1.99931	1.95113	2.69453	2.47745	0.417619	0.148959	-0.26866	0.210687	0.706309	0.44266	0.69549	0.966559	0.821577
hsa-miR-3184-3p	No	No	2.65614	1.82852	2.19188	2.66433	2.12627	2.20858	-0.305407	-0.187073	0.118334	0.220245	0.526168	0.664069	0.708569	0.916964	0.922712
hsa-miR-3184-5p	No	No	3.41251	3.4309	4.74238	3.76779	3.84912	4.03046	0.00431098	0.141628	0.137317	0.983501	0.563876	0.53238	0.996572	0.931998	0.870728
hsa-miR-3185	No	No	4.23848	4.13666	4.84171	4.37517	5.75794	4.47259	0.358826	0.00742606	-0.3514	0.140689	0.979824	0.179477	0.624336	0.998523	0.613552
hsa-miR-3185-3p:Novel	No	No	3.48655	2.60771	3.22781	3.69243	3.45239	4.04317	-0.119512	0.0930857	0.212598	0.635646	0.751079	0.424465	0.924781	0.9729	0.815389
hsa-miR-3186-3p	No	No	1.69274	1.26634	1.10749	1.85699	1.46945	1.50169	-0.365938	-0.261782	0.104157	0.197379	0.436955	0.739392	0.682284	0.87835	0.943219
hsa-miR-3186-5p	No	No	0	0	0.461977	0.724356	0.611215	0.927635	-0.027014	0.469584	0.496598	0.954246	0.375422	0.291306	NA	NA	NA
hsa-miR-3187-3p	No	No	0	0.752229	0	0.692162	0.856595	0.541332	0.184689	-0.19351	-0.378199	0.659196	0.705753	0.405381	NA	NA	NA
hsa-miR-3187-5p	No	No	2.275	1.39871	1.14222	2.29217	1.61556	1.4982	-0.43829	-0.652317	-0.214027	0.101697	0.0509836	0.496765	0.5497	0.46284	0.85339
hsa-miR-3188	No	No	2.275	1.74018	2.36722	2.53145	2.19631	2.34408	-0.201459	-0.0182389	0.18322	0.442	0.952334	0.510646	0.85986	0.997645	0.860319
hsa-miR-3188-5p:Novel	No	No	3.03668	2.39798	1.96494	3.13354	3.23341	2.46367	-0.0264609	-0.392349	-0.365889	0.908528	0.170357	0.160338	0.981057	0.668673	0.592512
hsa-miR-3189-3p	No	Yes	1.18074	1.37802	0	1.22318	1.87971	0.77863	0.542366	-0.776009	-1.31838	0.120063	0.0958967	0.00156047	NA	0.562011	0.0416811
hsa-miR-3189-5p	No	No	1.07338	0.501486	1.09594	1.12954	0.914506	1.39498	-0.164815	0.128369	0.293185	0.653254	0.75737	0.436034	NA	0.975105	0.818516
hsa-miR-3190-3p	No	No	8.26519	9.10475	8.85993	9.81971	9.30685	8.7892	-0.10376	-0.194849	-0.0910894	0.511711	0.302705	0.596855	0.883926	0.776473	0.894425
hsa-miR-3190-5p	No	No	0	0	0	0.396511	0.543956	0.509941	0.167162	0.599723	0.432561	0.737749	0.294633	0.390018	NA	NA	NA
hsa-miR-3191-3p	No	No	1.72243	1.39214	1.6139	2.1992	2.08425	1.87889	-0.141767	-0.343802	-0.202035	0.643952	0.351646	0.549889	0.924876	0.807456	0.880141
hsa-miR-3191-5p	No	No	1.21782	0.948667	1.3137	1.94419	1.28313	1.5757	-0.574505	-0.479738	0.0947673	0.119635	0.27252	0.817209	NA	0.765948	0.971273
hsa-miR-3192-3p	No	No	1.92033	1.88397	2.28444	2.33031	2.2435	2.7216	-0.0761047	0.0113585	0.0874632	0.769309	0.970009	0.748553	0.95028	0.997645	0.946254
hsa-miR-3192-5p	No	Yes	3.83842	4.0005	4.40966	7.33747	4.76135	12.9561	-0.630653	1.03228	1.66293	0.0741652	0.0116195	8.57242e-06	0.492442	0.234556	0.00113491
hsa-miR-3193	No	No	4.41061	4.37345	3.99862	5.15345	5.07444	4.68656	-0.0673044	-0.0591499	0.00815448	0.742634	0.809207	0.970727	0.942371	0.977782	0.997578
hsa-miR-3193-3p:Novel	No	No	0.580915	0.616591	1.10749	0.844803	0.839563	1.26914	-0.0273805	0.259565	0.286945	0.942269	0.542014	0.4473	NA	0.9204	NA
hsa-miR-3194-3p	No	No	1.10419	1.23318	1.6139	1.49475	1.42398	1.60789	0.213616	0.352903	0.139287	0.477802	0.305414	0.639948	NA	0.777853	0.911432
hsa-miR-3194-5p	No	Yes	1.32807	0.651927	0.777959	7.7305	2.06678	8.82931	-1.78091	0.741121	2.52204	0.00536088	0.319659	0.000238857	0.137493	0.792147	0.0129879
hsa-miR-3195	No	Yes	3.94085	5.70473	4.07477	9.75897	10.5027	4.83642	0.158091	-1.05667	-1.21477	0.635046	0.00937481	0.00103499	0.924781	0.211584	0.0328286
hsa-miR-3195-3p:Novel	No	Yes	6.13246	6.21101	5.54372	6.72331	11.3261	5.37769	0.707067	-0.353469	-1.06054	0.0101474	0.293645	0.000446832	0.186575	0.773855	0.0200089
hsa-miR-3196	No	No	3.53179	2.78959	2.6274	3.57177	3.67307	2.96429	-0.00665769	-0.253585	-0.246928	0.979267	0.412409	0.379278	0.994832	0.858594	0.78458
hsa-miR-3196-3p:Novel	No	No	1.51834	1.59865	1.84421	1.84203	1.61615	2.10576	-0.222935	0.0470921	0.270027	0.40592	0.878691	0.33635	0.845168	0.986974	0.747036
hsa-miR-3197	No	No	1.39462	1.23167	1.3137	1.84794	1.77295	1.50139	-0.132425	-0.405353	-0.272928	0.665845	0.281227	0.428662	0.927188	0.770854	0.816389
hsa-miR-3197-3p:Novel	No	No	1.69274	1.55137	1.14222	2.21328	1.81387	1.21691	-0.271166	-0.836099	-0.564933	0.350486	0.0239508	0.102018	0.817059	0.341405	0.493088
hsa-miR-3198	No	No	3.31386	3.14519	2.95903	3.24505	3.52192	3.77606	0.140035	0.110917	-0.0291181	0.554783	0.692205	0.907228	0.897021	0.962808	0.993228
hsa-miR-3198-5p:Novel	No	No	13.2489	12.7997	14.4507	16.1175	12.9249	20.3987	-0.280643	0.267927	0.54857	0.158327	0.249789	0.00959569	0.641089	0.746625	0.146373
hsa-miR-3199	No	No	7.6813	7.00087	6.95921	8.32156	7.50154	6.94939	-0.165339	-0.146409	0.0189304	0.266788	0.412737	0.907688	0.750957	0.858594	0.993228
hsa-miR-3199-3p:Novel	No	No	2.13507	2.75778	1.93197	2.39409	2.62846	1.97472	0.172568	-0.0556166	-0.228185	0.467813	0.84841	0.377067	0.867758	0.982423	0.781092
hsa-miR-32-3p	No	No	1.27947	0.651927	0.666437	1.60593	0.924527	1.061	-0.792218	-0.581384	0.210834	0.0279388	0.178747	0.611183	NA	0.679422	0.901199
hsa-miR-32-5p	No	No	0.67847	0	0.713215	4.38549	1.06574	1.3019	-1.84832	-1.89012	-0.0417988	0.00547678	0.0180944	0.955397	0.137493	0.302648	0.997578
hsa-miR-3200-3p	No	No	0.882948	1.7521	1.3137	1.03871	1.79173	1.24439	0.777235	0.0775077	-0.699728	0.0157345	0.844594	0.0348772	NA	0.981737	0.28859
hsa-miR-3200-5p	No	No	1.24837	1.23318	1.10749	1.48906	1.67517	1.73722	0.000792203	-0.0481638	-0.048956	0.998109	0.902587	0.890242	0.998563	0.991871	0.990987
hsa-miR-3201	No	No	5.12087	6.50904	5.79591	6.15821	6.93526	5.76732	0.119709	-0.03947	-0.159179	0.559186	0.87281	0.473272	0.897021	0.983309	0.838698
hsa-miR-3201-3p:Novel	No	No	1.24837	1.18074	0.777959	1.50971	1.28278	1.2519	-0.243289	-0.272995	-0.0297055	0.460793	0.493038	0.935437	NA	0.905807	0.996303
hsa-miR-320a-5p	No	No	6.77094	7.31953	4.66775	11.7382	13.5335	9.42003	0.177898	-0.444879	-0.622777	0.603468	0.278266	0.0940935	0.912181	0.769846	0.472797
hsa-miR-320b	No	No	2.78924	3.5042	3.30724	5.90246	7.84721	4.11636	0.405659	-0.561561	-0.96722	0.256536	0.196167	0.0138699	0.73905	0.694861	0.173089
hsa-miR-320b-1-5p:Novel	No	No	3.94314	4.55429	4.42996	4.64009	4.80864	6.13237	-0.018138	0.391184	0.409322	0.930353	0.101697	0.0560043	0.98293	0.570184	0.364387
hsa-miR-320b-2-5p:Novel	No	No	3.38547	4.13666	3.42666	4.02491	4.38443	4.19809	0.0615374	0.0728734	0.011336	0.778348	0.778907	0.961214	0.952961	0.976845	0.997578
hsa-miR-320c	No	No	5.55675	4.39583	4.27929	6.84235	7.98301	5.12495	0.192425	-0.399034	-0.591458	0.493309	0.242821	0.0559287	0.877802	0.743095	0.364387
hsa-miR-320c-1-5p:Novel	No	No	3.03668	3.1973	2.76631	3.15827	3.29065	2.95571	-0.0709125	-0.206079	-0.135166	0.729024	0.399688	0.542472	0.938306	0.847902	0.876034
hsa-miR-320c-2-5p:Novel	No	No	5.90371	6.7825	6.11215	7.47309	8.31301	7.78497	0.168174	-0.0723714	-0.240545	0.47099	0.795011	0.338493	0.870135	0.977716	0.748093
hsa-miR-320d	No	No	7.04119	10.9336	6.24734	17.284	20.3321	9.65758	0.244783	-0.758356	-1.00314	0.466479	0.0610087	0.00630092	0.867758	0.5047	0.106002
hsa-miR-320d-1-5p:Novel	No	No	7.51363	6.15833	7.00163	7.73505	6.77388	7.27713	-0.223815	-0.154131	0.0696848	0.236016	0.49226	0.734389	0.731704	0.905807	0.940827
hsa-miR-320d-2-5p:Novel	No	No	6.64034	6.96072	6.11215	8.7021	7.95225	6.60644	-0.116081	-0.260109	-0.144028	0.578444	0.30232	0.530948	0.90196	0.776098	0.870575
hsa-miR-320e-5p:Novel	No	No	8.32141	8.93195	8.74628	9.40037	9.58027	10.657	0.0329378	0.159159	0.126221	0.852464	0.445176	0.501735	0.970631	0.87835	0.854944
hsa-miR-323a-3p	No	No	0.914658	0	0.681801	1.16096	0.925034	0.99243	-0.128879	-0.212074	-0.0831948	0.755497	0.665695	0.852533	NA	0.960705	NA
hsa-miR-323a-5p	No	No	4.19756	4.72707	4.56888	6.03287	7.84316	6.9118	0.291897	0.271495	-0.0204021	0.347861	0.463517	0.951164	0.815768	0.889746	0.997578
hsa-miR-323b-3p	No	No	0	0	0	0.806105	0.652888	0.928784	-0.385995	0.0711944	0.457189	0.427229	0.899473	0.376166	NA	0.991871	NA
hsa-miR-323b-5p	No	No	0.985213	1.06395	1.39227	1.31724	1.69138	1.48697	0.182757	0.18247	-0.000286619	0.610695	0.66997	0.999399	NA	0.961432	0.999399
hsa-miR-324-3p	No	No	2.24784	1.99831	1.38593	3.97292	3.58803	2.40629	-0.0702915	-0.791307	-0.721016	0.834332	0.0556623	0.0567758	0.96623	0.488925	0.366276
hsa-miR-324-5p	No	No	1.51834	1.39214	1.84791	2.24128	1.97335	1.9133	-0.14826	-0.399725	-0.251464	0.618892	0.265393	0.444751	0.916915	0.758368	0.822262
hsa-miR-325	No	No	3.83279	3.18899	4.09081	4.3568	4.25875	4.50455	-0.0839351	0.0702445	0.15418	0.704318	0.787727	0.514017	0.9327	0.97765	0.861176
hsa-miR-325-3p:Novel	No	No	3.65863	3.53179	3.22781	4.1061	3.75606	3.87096	-0.153232	-0.161708	-0.00847603	0.452457	0.5081	0.969686	0.860865	0.911072	0.997578
hsa-miR-326	No	No	11.522	10.4411	10.0216	14.4378	16.5094	10.3743	0.159498	-0.45215	-0.611648	0.503623	0.116482	0.0191914	0.880288	0.594162	0.206831
hsa-miR-326-5p:Novel	No	No	5.59675	6.20546	6.45562	6.10133	6.05666	8.87563	-0.054401	0.440032	0.494433	0.771416	0.0397656	0.0101249	0.950985	0.420972	0.148939
hsa-miR-328-3p	No	No	7.04119	6.21101	3.95599	11.8958	10.4938	11.2473	-0.108252	-0.213078	-0.104826	0.773062	0.633083	0.795828	0.950985	0.951674	0.964688
hsa-miR-328-5p	No	No	0.624187	0	0.681801	0.889816	0.697506	0.779206	-0.27755	-0.0899145	0.187636	0.480529	0.841869	0.648854	NA	0.980672	NA
hsa-miR-329-3p	No	No	1.32807	1.55137	1.43165	1.49325	1.80699	1.67776	0.370846	0.306525	-0.0643204	0.215436	0.380074	0.830911	0.701641	0.829577	0.974172
hsa-miR-330-3p	No	No	2.42754	1.84977	2.15441	3.80627	2.79675	3.22693	-0.359272	-0.475319	-0.116047	0.255734	0.205538	0.737237	0.73905	0.705234	0.942723
hsa-miR-330-5p	No	No	2.79838	2.846	2.19188	3.1897	3.3413	2.66296	0.203872	-0.249144	-0.453016	0.407877	0.40851	0.0937879	0.845168	0.85593	0.472783
hsa-miR-331-3p	No	No	0.457329	1.063	0.777959	1.48575	1.85894	1.35412	0.360125	-0.287793	-0.647918	0.414624	0.585566	0.170934	0.845168	0.939678	0.602424
hsa-miR-331-5p	No	No	0	1.063	0.681801	0.924701	1.34657	0.959041	0.373549	0.149978	-0.223571	0.328294	0.746561	0.581163	NA	0.9729	0.887287
hsa-miR-335-3p	No	No	0.65719	0.899229	0	0.943911	1.20585	0.6242	0.205478	-0.536437	-0.741915	0.582738	0.259984	0.0831913	NA	0.755113	NA
hsa-miR-335-5p	No	No	0.828465	1.09336	0.988996	1.13145	1.31042	1.0178	0.205731	-0.243703	-0.449434	0.585413	0.597968	0.276733	NA	0.943798	0.701626
hsa-miR-337-3p	No	No	0	0	0	0.574239	0.664938	0.567206	0.222043	0.0546218	-0.167421	0.631466	0.920932	0.729713	NA	NA	NA
hsa-miR-337-5p	No	No	1.41283	1.59592	1.14222	1.56935	1.91964	1.67681	0.259631	0.211369	-0.0482618	0.402655	0.566294	0.881254	0.845168	0.932191	0.990987
hsa-miR-338-3p	No	No	2.24784	2.43803	2.459	4.12332	3.69722	4.43267	-0.0585192	-0.0381208	0.0203984	0.863615	0.924519	0.955438	0.974107	0.994483	0.997578
hsa-miR-338-5p	No	No	3.54887	3.5453	2.96699	6.00832	5.63401	4.18916	-0.0294717	-0.572582	-0.54311	0.926963	0.140941	0.125191	0.982695	0.637962	0.534566
hsa-miR-339-3p	No	No	3.03668	3.00037	3.23384	4.01524	4.04094	5.3375	0.0247207	0.125036	0.100315	0.926471	0.689564	0.722321	0.982695	0.962808	0.93734
hsa-miR-339-5p	No	No	3.54887	4.89547	3.28782	4.28881	6.51298	4.69701	0.621391	0.0136749	-0.607716	0.0377811	0.969625	0.0577599	0.37662	0.997645	0.369183
hsa-miR-33a-3p	No	No	0	0	0	0.0556362	0.222327	0.259262	0.671752	0.691539	0.0197872	0.492652	0.551881	0.984972	NA	NA	NA
hsa-miR-33a-5p	No	No	2.2227	1.88712	2.459	4.37535	2.53591	3.67356	-0.662611	-0.234559	0.428052	0.0311825	0.508369	0.194504	0.338491	0.911072	0.627398
hsa-miR-33b-3p	No	No	0.882948	0.629039	0.715827	1.00164	1.12223	0.949407	0.00600927	-0.205585	-0.211594	0.987401	0.65003	0.603938	NA	0.956521	0.896298
hsa-miR-33b-5p	No	No	0.985213	1.2422	1.3137	1.29344	1.42042	2.08828	0.205793	0.866545	0.660752	0.554234	0.0261192	0.0497692	NA	0.353698	0.341323
hsa-miR-340-3p	No	No	1.16183	1.07483	1.43165	3.94432	1.50585	2.5209	-1.25905	-0.757986	0.501069	0.00681929	0.165209	0.327204	0.160862	0.665408	0.734953
hsa-miR-340-5p	No	Yes	4.49568	6.48299	4.07477	39.7632	13.4155	5.93092	-1.54408	-2.75415	-1.21008	0.000369573	1.50717e-07	0.0116653	0.0289015	0.000163277	0.159406
hsa-miR-342-3p	No	No	1.82932	1.8729	2.14748	4.08515	4.02044	5.37195	0.0845205	0.298211	0.213691	0.837979	0.539256	0.626143	0.967125	0.9204	0.908339
hsa-miR-342-5p	No	No	2.32366	2.18673	2.15441	2.45779	2.76201	3.1708	0.117585	0.339042	0.221457	0.659043	0.274765	0.42165	0.927188	0.76656	0.815388
hsa-miR-345-3p	No	No	2.75227	3.2245	2.19188	3.10083	3.74728	2.00237	0.221032	-0.576492	-0.797524	0.380132	0.0728167	0.00608201	0.833256	0.514295	0.103462
hsa-miR-345-5p	No	No	5.61961	4.31083	5.01079	9.68931	6.73299	8.15182	-0.465685	-0.42757	0.0381152	0.119394	0.228216	0.906555	0.579801	0.729392	0.993228
hsa-miR-346	No	No	5.31227	4.4055	4.66775	5.24538	5.04156	4.97021	-0.0718117	-0.182141	-0.11033	0.716763	0.442662	0.608954	0.935784	0.87835	0.899691
hsa-miR-346-3p:Novel	No	No	2.55895	2.12599	2.21498	3.52734	2.49018	2.6265	-0.495297	-0.537751	-0.0424538	0.0467434	0.070846	0.879151	0.4191	0.51256	0.990987
hsa-miR-34a-3p	No	No	1.12392	1.7521	1.4737	1.55407	1.86616	1.43121	0.219988	-0.379095	-0.599083	0.489144	0.337181	0.0908859	0.877802	0.805028	0.463564
hsa-miR-34a-5p	No	No	4.04589	3.80315	3.95599	5.59713	5.53597	4.84371	0.0372997	-0.259618	-0.296917	0.894333	0.441253	0.331613	0.976637	0.87835	0.739494
hsa-miR-34b-3p	No	No	0.65719	0	0	0.683509	0.874297	0.4091	-0.0717779	-0.729653	-0.657875	0.873203	0.195964	0.201634	NA	NA	NA
hsa-miR-34b-5p	No	No	6.88068	5.46854	5.33149	7.5056	5.90043	5.63744	-0.34417	-0.327942	0.0162284	0.0762028	0.157821	0.939604	0.497915	0.655362	0.996608
hsa-miR-34c-3p	No	No	0.65719	0	0	0.704932	0.292034	0.415133	-0.936789	-0.856934	0.0798552	0.0433324	0.124704	0.880045	NA	NA	NA
hsa-miR-34c-5p	No	No	1.37199	1.2966	1.43165	2.70466	2.05157	1.81099	-0.243383	-0.649838	-0.406455	0.505915	0.143502	0.320134	0.881221	0.638638	0.729296
hsa-miR-3529-3p	No	No	3.2026	3.29687	3.33218	3.76112	3.72418	4.21691	-0.0929456	0.0132588	0.106204	0.684779	0.960684	0.663182	0.929346	0.997645	0.922712
hsa-miR-3605-3p	No	No	0	0	0	0.868542	0.884746	3.17598	0.0931963	1.85557	1.76237	0.877525	0.00612248	0.00332787	NA	0.154284	0.0713617
hsa-miR-3605-5p	No	No	2.43565	1.82834	2.0454	2.99215	2.07581	2.41714	-0.658587	-0.287968	0.370619	0.0087444	0.325064	0.181661	0.178684	0.793452	0.615477
hsa-miR-3606-3p	No	No	1.06753	0.609508	1.09594	0.921657	0.732876	1.04502	-0.281187	0.466359	0.747546	0.44949	0.259886	0.0449534	NA	0.755113	NA
hsa-miR-3606-5p	No	No	1.12392	1.09336	1.55592	1.46592	1.41342	1.68619	-0.159842	0.182844	0.342686	0.622834	0.624043	0.310248	NA	0.949503	0.722522
hsa-miR-3609	No	No	1.77444	2.65987	2.15441	2.29449	2.65746	2.32043	0.202477	0.0526923	-0.149785	0.394376	0.853308	0.550464	0.843465	0.982423	0.880141
hsa-miR-3609-5p:Novel	No	No	6.62514	6.1508	6.11215	7.63417	7.01035	7.85443	-0.119681	0.0196772	0.139358	0.56285	0.935706	0.5295	0.897021	0.996174	0.870117
hsa-miR-361-3p	No	No	9.85213	8.00543	7.85975	20.8557	24.2431	14.3399	0.277808	-0.638253	-0.91606	0.453159	0.149596	0.0225388	0.860865	0.646526	0.225082
hsa-miR-361-5p	No	No	0.828465	0.696072	0	2.14877	1.34907	1.08399	-0.619152	-1.1605	-0.541351	0.240854	0.0739831	0.369414	NA	0.517589	0.773902
hsa-miR-3610	No	No	2.24784	1.63885	3.16158	2.24585	2.90514	3.80495	0.190181	0.839063	0.648882	0.562672	0.0262823	0.0522386	0.897021	0.354429	0.349597
hsa-miR-3610-5p:Novel	No	No	2.275	1.84977	1.58079	2.54934	2.15797	2.15572	-0.227016	-0.240431	-0.0134149	0.398331	0.45393	0.963725	0.844676	0.881341	0.997578
hsa-miR-3611	No	No	6.13246	5.43833	4.84171	5.94326	6.1881	5.65851	0.0158999	0.0317849	0.015885	0.936856	0.894784	0.941623	0.985412	0.991492	0.996608
hsa-miR-3611-5p:Novel	No	Yes	7.66557	6.9941	4.27929	15.967	9.26176	5.38662	-0.690198	-1.58578	-0.895585	0.02657	2.98563e-05	0.0103501	0.309915	0.00421883	0.149405
hsa-miR-3612	No	No	5.29769	6.36854	6.64495	5.31599	6.59117	6.46812	0.306107	0.242843	-0.063264	0.0848805	0.244947	0.730211	0.507358	0.743719	0.940705
hsa-miR-3612-3p:Novel	No	Yes	3.41251	3.25313	3.68842	3.77048	10.2312	4.0567	1.37601	0.285231	-1.09078	0.000542536	0.553488	0.0105805	0.0352047	0.924851	0.149405
hsa-miR-3613-3p	No	No	1.4702	1.59021	1.09594	1.87866	1.98699	1.13441	-0.0117597	-0.433162	-0.421402	0.966213	0.220734	0.190725	0.992184	0.719797	0.623801
hsa-miR-3613-5p	No	No	5.22824	4.87607	4.07477	13.2063	9.66945	6.85142	-0.430307	-0.90743	-0.477123	0.191227	0.0221112	0.187832	0.680975	0.330592	0.62236
hsa-miR-3614-3p	No	No	5.79926	5.22054	5.33801	5.89679	10.2889	5.64541	0.747002	-0.116587	-0.863589	0.0136956	0.750576	0.00855299	0.225511	0.9729	0.134942
hsa-miR-3614-5p	No	No	13.7321	12.2647	8.55755	21.5435	18.0461	15.159	-0.245297	-0.502262	-0.256965	0.402364	0.151266	0.419444	0.845168	0.651049	0.814027
hsa-miR-3615-5p:Novel	No	No	6.4026	6.26464	6.56851	7.56806	8.35402	7.33803	0.121423	0.0927476	-0.0286758	0.596829	0.735145	0.90763	0.911205	0.970182	0.993228
hsa-miR-3616-3p	No	No	0.624187	0.651927	0	0.938131	0.737511	0.832325	-0.266166	-0.424602	-0.158437	0.5343	0.409604	0.738231	NA	0.85593	NA
hsa-miR-3616-5p	No	No	1.18074	1.55137	0.777959	1.35877	1.60895	1.05767	0.170457	-0.481632	-0.652089	0.578109	0.219915	0.0650777	NA	0.718613	0.390082
hsa-miR-3617-3p	No	No	0	0	0	0.587014	0.495289	0.487466	-0.212089	0.0128939	0.224983	0.635829	0.980373	0.63303	NA	NA	NA
hsa-miR-3617-5p	No	No	1.39462	0.819424	1.24947	1.61205	0.881516	1.59034	-0.76938	-0.0585114	0.710869	0.0129307	0.861812	0.0287031	NA	0.982423	0.256308
hsa-miR-3618	No	No	3.94314	3.04754	3.22781	4.26238	3.47192	3.08363	-0.243885	-0.432744	-0.188859	0.2145	0.0710928	0.394115	0.701515	0.51256	0.791407
hsa-miR-3618-5p:Novel	No	No	5.3659	4.17643	4.40966	6.13333	5.70218	4.38709	-0.139962	-0.405886	-0.265924	0.514436	0.120468	0.266366	0.885597	0.604197	0.695802
hsa-miR-3619-3p	No	No	1.37614	1.37889	1.42643	1.74417	1.85632	1.58606	-0.0550096	0.0186692	0.0736788	0.855098	0.958459	0.8198	0.970631	0.997645	0.971902
hsa-miR-3619-5p	No	No	1.21782	0.649043	0.982468	1.10895	1.09934	0.917581	-0.0681764	-0.102044	-0.0338678	0.845403	0.807423	0.92858	NA	0.977782	0.995573
hsa-miR-362-3p	No	No	0	0	0.461052	0.812077	0.782218	0.700208	-0.182857	-0.239468	-0.0566112	0.659801	0.630962	0.901031	NA	0.951251	NA
hsa-miR-362-5p	No	No	1.32807	0.813281	0.713215	1.52421	1.39652	1.01347	-0.192647	-0.465876	-0.273229	0.605944	0.313648	0.520815	NA	0.788616	0.86611
hsa-miR-3620-5p	No	No	2.79838	2.08821	3.16158	3.14354	3.12653	3.2723	0.00915049	0.096245	0.0870945	0.969146	0.729562	0.727643	0.992486	0.970182	0.940438
hsa-miR-3621	No	No	4.18386	4.40327	3.99862	4.52005	5.6624	4.16676	0.308822	-0.0757837	-0.384605	0.153445	0.772522	0.0997133	0.632992	0.976522	0.488932
hsa-miR-3621-3p:Novel	No	No	2.13507	2.18673	2.49894	3.33982	3.08188	4.7464	-0.118872	0.501936	0.620807	0.719994	0.191269	0.0738801	0.935784	0.689928	0.421283
hsa-miR-3622a-3p	No	No	1.27947	0.687975	1.3137	1.46811	1.3642	1.14235	-0.109598	-0.29085	-0.181252	0.758955	0.504771	0.648953	NA	0.911072	0.917391
hsa-miR-3622a-5p	No	No	1.35694	1.03367	0.923954	1.64026	1.11182	1.21253	-0.269458	-0.143281	0.126177	0.406528	0.708062	0.719989	NA	0.967297	0.937202
hsa-miR-3622b-3p	No	No	0	0.699353	0.666437	0.624735	1.04879	0.630355	0.607441	0.149515	-0.457926	0.148808	0.770247	0.293095	NA	0.976522	NA
hsa-miR-3622b-5p	No	No	2.32366	2.19791	1.58079	2.95015	2.62092	3.56671	-0.106905	-0.0168504	0.0900542	0.72561	0.962116	0.779847	0.937143	0.997645	0.957514
hsa-miR-363-3p	No	No	1.32807	1.23167	1.55592	2.73542	2.75545	2.44463	0.0591848	-0.215764	-0.274948	0.883525	0.657058	0.532445	0.976637	0.958025	0.870728
hsa-miR-363-5p	No	No	2.20838	1.87735	1.09594	2.85373	2.48341	1.86402	-0.170454	-0.704053	-0.533598	0.55908	0.0502669	0.107557	0.897021	0.458898	0.501877
hsa-miR-3646	No	No	4.27013	2.75778	2.459	4.06149	3.26914	2.99153	-0.336173	-0.599545	-0.263372	0.0770849	0.011091	0.232619	0.497915	0.234556	0.66552
hsa-miR-3646-5p:Novel	No	No	2.79838	3.2245	3.4796	3.84337	3.50759	4.17732	-0.178556	0.149808	0.328364	0.395139	0.538661	0.137812	0.844074	0.9204	0.548546
hsa-miR-3648	No	Yes	9.93772	11.1897	9.30576	10.7801	21.6703	10.0616	0.96274	-0.0693372	-1.03208	0.000794423	0.840968	0.000880314	0.0386689	0.980325	0.0300855
hsa-miR-3648-3p:Novel	No	No	6.07336	8.19424	7.7169	7.32994	12.0565	8.20561	0.665976	0.177795	-0.488181	0.00437143	0.526479	0.0506454	0.122586	0.916964	0.34194
hsa-miR-3649	No	No	0	0.813281	0	1.08604	1.28033	0.671944	0.1794	-0.883067	-1.06247	0.66311	0.0928025	0.0261734	NA	0.549688	0.243462
hsa-miR-3649-5p:Novel	No	No	2.4854	1.63885	2.30989	2.75637	2.16597	2.42203	-0.406878	-0.29314	0.113739	0.0979007	0.309264	0.672173	0.54102	0.782794	0.925021
hsa-miR-3650-3p:Novel	No	No	2.2227	2.36148	1.97799	2.65912	2.64882	2.42152	0.157497	-0.197616	-0.355112	0.576956	0.563862	0.248488	0.90196	0.931998	0.68181
hsa-miR-3651	No	No	1.74275	1.55137	1.84791	1.79169	2.1299	1.89654	0.15805	0.168472	0.010422	0.578609	0.61471	0.971867	0.90196	0.946164	0.997578
hsa-miR-3651-5p:Novel	No	No	3.48549	3.14317	3.28782	3.8339	3.83649	3.52929	-0.108077	-0.115827	-0.00775009	0.651935	0.685244	0.976222	0.927188	0.962808	0.997578
hsa-miR-3652-3p:Novel	No	No	3.74512	4.55712	4.77261	4.83993	4.88335	5.89712	-0.0206982	0.26289	0.283588	0.923424	0.292907	0.207288	0.982695	0.773855	0.640154
hsa-miR-3654	No	No	1.21782	1.37802	1.77542	1.67932	1.84623	1.74801	0.150745	-0.0947342	-0.24548	0.619509	0.795449	0.451857	0.916915	0.977716	0.828031
hsa-miR-3654-5p:Novel	No	No	3.44486	2.59781	3.16158	4.44334	4.96492	3.83353	0.1259	-0.145117	-0.271017	0.664573	0.677396	0.389826	0.927188	0.962434	0.787517
hsa-miR-3655	No	No	4.49568	4.13666	3.66203	4.77218	4.42885	4.20587	-0.123937	-0.101594	0.0223429	0.536356	0.669303	0.917797	0.895399	0.961432	0.995573
hsa-miR-3655-3p:Novel	No	No	2.43565	2.02328	2.96699	2.8142	2.38273	3.00272	-0.238132	0.0699243	0.308056	0.370791	0.82061	0.274223	0.829865	0.977782	0.70024
hsa-miR-3657	No	No	3.65347	4.09945	4.30883	3.82605	4.11395	4.46898	0.149379	0.200387	0.0510077	0.47558	0.414364	0.814856	0.874269	0.8597	0.971096
hsa-miR-3657-5p:Novel	No	No	5.91471	5.23862	5.08175	7.42857	6.34981	6.77778	-0.22293	-0.145926	0.0770041	0.229443	0.507209	0.702272	0.724126	0.911072	0.933113
hsa-miR-3658	No	No	3.54887	2.78429	3.28782	4.1112	3.39386	3.95297	-0.358491	-0.0780304	0.280461	0.0852657	0.748165	0.211853	0.508508	0.9729	0.650148
hsa-miR-3658-3p:Novel	No	No	1.53311	2.39798	1.6139	2.22704	2.66915	2.00325	0.295725	-0.0406246	-0.336349	0.26761	0.901075	0.244624	0.750957	0.991871	0.679015
hsa-miR-3659-5p:Novel	No	No	2.95564	3.59692	3.22781	3.45447	4.49152	3.50054	0.309936	0.0345046	-0.275431	0.231894	0.911838	0.321308	0.725975	0.993733	0.730296
hsa-miR-365a-3p, hsa-miR-365b-3p	No	No	7.67685	4.96881	4.91234	9.80382	6.99603	7.42292	-0.435397	-0.381074	0.0543231	0.0776321	0.195403	0.840634	0.497915	0.694815	0.977743
hsa-miR-365a-5p	No	No	3.22013	4.12785	3.74841	3.70105	5.47261	5.19277	0.562611	0.463858	-0.098753	0.0497112	0.169892	0.740839	0.427576	0.667654	0.944109
hsa-miR-365b-5p	No	No	4.72297	5.5038	4.3495	5.74414	6.33168	4.7648	0.123909	-0.201121	-0.32503	0.535608	0.409793	0.139626	0.895399	0.85593	0.550729
hsa-miR-3660	No	No	4.72297	4.6541	6.0893	10.1999	6.52226	7.84786	-0.581537	-0.502563	0.0789738	0.059937	0.170676	0.814319	0.469142	0.669115	0.971096
hsa-miR-3660-5p:Novel	No	No	9.7426	8.62166	8.69901	9.74018	9.79288	9.2272	-0.0210767	-0.0667854	-0.0457087	0.896845	0.731232	0.79523	0.976637	0.970182	0.964688
hsa-miR-3661	No	No	12.2649	10.2486	11.6694	11.3737	11.8068	12.0605	0.063598	0.0457393	-0.0178587	0.677777	0.800958	0.91301	0.929203	0.977782	0.993963
hsa-miR-3661-3p:Novel	No	No	3.06623	4.13406	3.88979	3.62973	6.81049	3.86007	0.838535	0.0835325	-0.755002	0.00706701	0.824569	0.0236673	0.160862	0.977782	0.231838
hsa-miR-3662	No	No	13.3362	12.0882	11.5263	18.8729	17.0106	15.6317	-0.157938	-0.171956	-0.0140181	0.538389	0.574203	0.95979	0.896262	0.936358	0.997578
hsa-miR-3662-5p:Novel	No	No	6.07336	6.55539	6.76189	6.83344	8.05027	7.13611	0.194421	0.138255	-0.0561652	0.348644	0.577338	0.800609	0.815768	0.937519	0.969325
hsa-miR-3663-3p	No	No	2.71388	2.36353	1.6139	3.33552	2.98175	2.31256	-0.115377	-0.405385	-0.290008	0.675045	0.229878	0.347838	0.929203	0.729593	0.755468
hsa-miR-3664-3p	No	No	1.69274	1.5181	0.482992	1.78262	1.79311	1.04212	-0.0944643	-0.668587	-0.574123	0.762049	0.0924621	0.11645	0.948138	0.549364	0.518409
hsa-miR-3664-5p	No	No	1.87256	2.27165	1.6139	2.44408	2.39266	2.09958	-0.027806	-0.186908	-0.159102	0.910618	0.532145	0.556664	0.981057	0.9204	0.880735
hsa-miR-3665-3p:Novel	No	Yes	5.68751	5.39538	3.92987	6.83439	9.27599	4.2959	0.387855	-0.655299	-1.04315	0.162557	0.056267	0.000785686	0.643392	0.489451	0.0284811
hsa-miR-3666	No	No	4.41676	3.74581	2.94741	4.7411	5.38842	3.64799	0.100075	-0.289931	-0.390006	0.637804	0.266012	0.0978005	0.924781	0.758368	0.486606
hsa-miR-3666-3p:Novel	No	No	6.5719	6.8618	9.13776	7.52262	7.60589	9.50865	0.0315898	0.363329	0.33174	0.855291	0.0699487	0.0647256	0.970631	0.51256	0.389505
hsa-miR-3667-3p	No	No	3.83279	3.5042	3.28782	4.38218	3.79535	3.83527	-0.174705	-0.167405	0.0073008	0.408546	0.50597	0.974687	0.845168	0.911072	0.997578
hsa-miR-3667-5p	No	No	2.82565	3.10762	3.11183	3.47079	3.62883	3.15061	0.115382	0.000470297	-0.114912	0.587671	0.998531	0.61404	0.905798	0.999681	0.901199
hsa-miR-3668	No	No	7.86745	9.04893	7.84537	9.67981	10.9137	10.1107	0.122608	0.157603	0.0349947	0.601779	0.572812	0.889648	0.911661	0.934558	0.990987
hsa-miR-3668-3p:Novel	No	No	3.9842	4.25579	3.4796	4.69284	5.4761	3.96061	0.12919	-0.2017	-0.33089	0.585752	0.486079	0.205554	0.904849	0.904268	0.637798
hsa-miR-367-3p	No	No	1.37614	1.09336	1.24947	1.61777	1.15058	1.23591	-0.488738	-0.264247	0.224491	0.12152	0.470768	0.51416	NA	0.893689	0.861176
hsa-miR-367-5p	No	No	1.82932	1.79846	1.77934	1.82291	1.94176	2.1569	0.0239346	0.329219	0.305285	0.927397	0.279841	0.257799	0.982695	0.770095	0.687991
hsa-miR-3670	No	Yes	4.23848	3.48036	2.78454	4.70463	13.1063	3.40755	1.35345	-0.400067	-1.75351	0.000592204	0.407371	5.02273e-05	0.0352047	0.855822	0.00364148
hsa-miR-3670-5p:Novel	No	No	3.38547	2.39798	2.20483	3.75641	2.80341	2.57362	-0.407216	-0.448048	-0.0408321	0.0539831	0.0796734	0.864447	0.441924	0.529271	0.98546
hsa-miR-3671	No	No	3.48655	2.48441	2.30989	3.54041	3.68514	3.06859	0.07013	-0.229422	-0.299552	0.753391	0.399448	0.222741	0.944715	0.847902	0.656792
hsa-miR-3671-5p:Novel	No	No	2.94041	2.78959	3.22781	3.36529	2.90989	3.13009	-0.0830344	0.0869619	0.169996	0.717461	0.746292	0.483561	0.935784	0.9729	0.843807
hsa-miR-3672	No	No	2.79838	2.5932	1.55592	2.85218	3.17579	2.74154	0.141965	-0.218325	-0.36029	0.570615	0.471698	0.186494	0.900429	0.893765	0.620627
hsa-miR-3672-3p:Novel	No	No	1.61836	0.929863	1.58079	1.70765	1.35807	1.92844	-0.254868	0.15673	0.411598	0.435298	0.67591	0.229298	0.853754	0.962434	0.661455
hsa-miR-3674-3p:Novel	No	No	4.06641	4.09945	3.68842	4.70207	4.42317	3.95197	-0.034245	-0.211776	-0.177531	0.859857	0.367336	0.404845	0.971729	0.821075	0.802661
hsa-miR-3675-3p	No	No	3.54223	4.99579	5.45441	5.26158	5.71824	5.8745	0.0982179	0.166014	0.067796	0.718407	0.606541	0.815508	0.935784	0.944254	0.971096
hsa-miR-3677-3p	No	No	2.58364	2.35453	1.7398	2.51684	2.50254	1.9649	-0.00317645	-0.469661	-0.466485	0.990642	0.163118	0.128554	0.996572	0.662665	0.535299
hsa-miR-3677-5p	No	No	0.766557	1.063	0.777959	0.99909	1.12945	0.804542	0.144219	-0.376159	-0.520378	0.675011	0.383313	0.178088	NA	0.834789	0.613436
hsa-miR-3678-3p	No	No	1.06753	0.324522	1.10749	1.57168	0.994281	1.42608	-0.65938	-0.217426	0.441953	0.0586636	0.589887	0.247553	NA	0.941911	0.68181
hsa-miR-3678-5p	No	No	1.7659	2.18673	2.20483	2.54169	2.95985	2.23787	0.185267	-0.0448901	-0.230157	0.492743	0.891283	0.432831	0.877802	0.991492	0.817848
hsa-miR-3679-3p	No	No	0.735102	0	0	0.811086	0.38802	0.544925	-0.880617	-0.752811	0.127806	0.0714759	0.196267	0.816797	NA	NA	NA
hsa-miR-3679-5p	No	No	0.914658	1.2966	0.715827	1.3182	2.47642	1.90841	0.914989	0.315715	-0.599273	0.026806	0.525437	0.165172	0.309915	0.916964	0.595913
hsa-miR-3680-3p	No	No	1.11135	0.651927	0.713215	1.21386	0.877546	0.691251	-0.432262	-0.837928	-0.405667	0.201288	0.0472597	0.309611	NA	0.452722	NA
hsa-miR-3680-5p	No	No	3.23672	3.2245	3.40901	3.81447	3.54331	3.49341	-0.134277	-0.0372815	0.0969956	0.578575	0.896972	0.711218	0.90196	0.991871	0.933474
hsa-miR-3681-3p	No	No	0	0	0	0.293513	0.277498	0.495846	-0.0713667	0.721515	0.792882	0.89636	0.249842	0.155373	NA	NA	NA
hsa-miR-3681-5p	No	No	2.36148	2.28727	2.28444	2.39926	2.74	3.03537	0.201721	0.233087	0.0313656	0.452943	0.456293	0.90981	0.860865	0.884816	0.993963
hsa-miR-3682-3p	No	No	3.38547	2.78959	2.49894	3.65996	3.26348	3.45476	-0.20286	0.147668	0.350528	0.406239	0.606003	0.17875	0.845168	0.944254	0.613552
hsa-miR-3682-5p	No	No	0	0.616591	0	0.690287	0.656413	0.751522	-0.056806	0.297586	0.354392	0.889668	0.523795	0.392237	NA	NA	NA
hsa-miR-3683	No	No	2.65614	2.43984	2.21498	2.92909	2.95238	2.42971	0.0910978	-0.182686	-0.273784	0.701931	0.529851	0.294906	0.930963	0.91939	0.716004
hsa-miR-3683-3p:Novel	No	No	3.92562	4.25198	3.55867	4.31558	4.51983	4.05707	-0.0174297	0.0178242	0.035254	0.928156	0.938225	0.864864	0.982695	0.997645	0.98546
hsa-miR-3684	No	No	4.9935	3.695	4.14264	5.31791	4.88757	5.44036	-0.125701	-0.0192763	0.106425	0.560277	0.93982	0.646681	0.897021	0.997645	0.916417
hsa-miR-3684-5p:Novel	No	No	2.82565	3.08295	3.16158	3.21015	3.42095	3.52186	-0.0425793	0.122605	0.165184	0.850443	0.642696	0.487508	0.970631	0.956297	0.84709
hsa-miR-3685	No	No	4.49568	4.37345	5.56908	4.71386	4.8031	5.7412	0.00281076	0.301972	0.299161	0.988143	0.167779	0.126081	0.996572	0.665408	0.534703
hsa-miR-3685-3p:Novel	No	No	0	0.501486	0.715827	0.527674	0.888637	1.01243	0.546236	0.781764	0.235528	0.213404	0.1152	0.570937	NA	0.590527	NA
hsa-miR-3686	No	No	3.9842	3.28009	3.95599	3.86759	3.91119	4.16744	0.0213728	0.21549	0.194117	0.917927	0.372129	0.36802	0.982695	0.822797	0.773573
hsa-miR-3686-5p:Novel	No	Yes	4.55001	4.10053	5.47971	4.75048	4.53996	7.00478	-0.183299	0.597257	0.780556	0.380276	0.0115528	0.000256786	0.833256	0.234556	0.0134813
hsa-miR-3688-3p	No	No	2.62876	1.89733	2.41496	2.89357	2.49604	2.24013	-0.220822	-0.442249	-0.221427	0.373587	0.144694	0.428469	0.830884	0.638935	0.816389
hsa-miR-3688-5p	No	No	4.07082	3.14317	2.96699	3.8285	3.44373	3.21401	-0.217992	-0.227814	-0.00982282	0.279142	0.345345	0.964653	0.758226	0.806301	0.997578
hsa-miR-3689a-3p	No	No	3.53179	3.00892	3.88979	3.73916	3.14987	4.75153	-0.180492	0.526797	0.707289	0.440842	0.0485933	0.00337105	0.858707	0.455614	0.0717821
hsa-miR-3689a-5p, hsa-miR-3689b-5p, hsa-miR-3689e	No	No	10.9604	11.1856	9.22105	13.1901	10.4124	12.9962	-0.31391	0.186398	0.500308	0.169659	0.490407	0.0422473	0.654623	0.905807	0.319931
hsa-miR-3689b-3p, hsa-miR-3689c	No	No	5.66425	6.91943	6.10338	6.99046	8.50587	6.72063	0.173562	0.0622652	-0.111297	0.490828	0.836917	0.683069	0.877802	0.979381	0.926479
hsa-miR-3689c-5p:Novel	No	No	1.72243	0.948667	1.6139	1.68028	1.1312	2.26341	-0.4739	0.640179	1.11408	0.182074	0.102989	0.00206618	0.672194	0.57155	0.0515699
hsa-miR-3689d	No	No	4.48076	4.25579	4.34693	5.85849	5.04589	5.43548	-0.1965	-0.0903093	0.106191	0.410938	0.749427	0.680646	0.845168	0.9729	0.925021
hsa-miR-3689d-3p:Novel	No	No	3.37176	3.10273	2.6097	3.72207	4.29838	4.00233	0.27672	0.148528	-0.128192	0.314655	0.650472	0.661419	0.791305	0.956577	0.922712
hsa-miR-3689e-3p:Novel	No	No	0	0	0	0.428343	0.411639	0.371482	-0.169271	-0.362733	-0.193461	0.735382	0.546106	0.721357	NA	NA	NA
hsa-miR-3689f	No	No	3.12093	3.76795	3.23384	3.41978	4.30558	2.9928	0.315849	-0.132579	-0.448428	0.156533	0.629189	0.0658697	0.640717	0.9503	0.391744
hsa-miR-3689f-3p:Novel	No	No	0	0	0	0.225637	0.325215	0.160824	0.509986	-0.132993	-0.642978	0.404557	0.856246	0.328101	NA	NA	NA
hsa-miR-369-3p	No	No	1.27947	1.28469	1.24947	1.26398	2.16508	1.36846	0.668784	0.244007	-0.424777	0.0724192	0.586542	0.273832	0.488228	0.940435	0.70024
hsa-miR-369-5p	No	No	0	0.799326	0.713215	0.509331	0.882816	0.832795	0.6828	0.941763	0.258963	0.107902	0.0500443	0.511908	NA	0.458898	NA
hsa-miR-3690	No	No	3.38547	2.55199	3.57914	4.62755	4.19363	4.19911	-0.0221979	-0.144487	-0.122289	0.9416	0.689486	0.709397	0.985589	0.962808	0.933113
hsa-miR-3690-3p:Novel	No	No	1.28022	1.55137	1.43165	1.51016	1.78747	1.68876	0.27877	0.0876918	-0.191079	0.34843	0.804842	0.538805	0.815768	0.977782	0.873023
hsa-miR-3691-3p	No	No	0.985213	1.07483	0.988996	1.13876	1.33909	2.31383	0.230149	0.819976	0.589826	0.539715	0.0500267	0.104873	NA	0.458898	0.499921
hsa-miR-3691-5p	No	Yes	2.13507	2.02328	2.15441	2.10738	2.7486	5.91333	0.353285	1.63486	1.28157	0.326925	6.01214e-05	0.000316892	0.803893	0.00656006	0.0158186
hsa-miR-3692-3p	No	No	0	0.776904	0	0.313821	0.845111	0.667367	0.849845	0.684047	-0.165798	0.0617682	0.199381	0.709703	NA	NA	NA
hsa-miR-3692-5p	No	No	2.24784	1.23318	1.97799	2.36894	1.6587	1.73789	-0.490789	-0.560733	-0.0699439	0.0892873	0.108685	0.83154	0.526211	0.581453	0.974172
hsa-miR-370-3p	No	No	2.13507	2.04972	2.28444	2.36741	2.49145	2.26357	0.0895733	-0.0848696	-0.174443	0.714195	0.772815	0.506472	0.935784	0.976522	0.859742
hsa-miR-370-5p	No	No	1.18074	1.2422	0.681801	1.46133	1.46448	1.62249	0.0396751	0.0818021	0.042127	0.907167	0.837656	0.906199	NA	0.979381	0.993228
hsa-miR-3713	No	No	0.985213	0	0.681801	1.1399	0.605263	0.848642	-0.906976	-0.521585	0.385392	0.0127936	0.2172	0.350595	NA	0.717887	NA
hsa-miR-3713-3p:Novel	No	No	0	0	0	0.106738	0.109682	0.222603	0.00261652	0.533965	0.531348	0.997984	0.663645	0.632382	NA	NA	NA
hsa-miR-3714	No	No	12.8909	12.4041	10.28	15.6752	15.7152	11.9147	-0.0574069	-0.306463	-0.249056	0.78505	0.226496	0.27957	0.954617	0.727868	0.702384
hsa-miR-3714-3p:Novel	No	No	0.766557	0.629039	1.22068	1.56864	1.10038	0.903801	-0.51822	-0.886003	-0.367783	0.175144	0.0596701	0.406662	NA	0.503708	0.804081
hsa-miR-371a-3p	No	No	0	0	0.461977	0.603361	0.667326	0.636431	0.0695875	0.152593	0.083006	0.874926	0.77139	0.858503	NA	NA	NA
hsa-miR-371a-5p	No	No	1.53311	1.02513	1.38593	1.94219	1.29516	1.25506	-0.660681	-0.645768	0.0149129	0.0205678	0.0659527	0.964659	NA	0.505032	0.997578
hsa-miR-371b-3p	No	No	0	0	0	0.353407	0.431385	0.220014	0.338149	-0.0237822	-0.361931	0.518713	0.9698	0.517327	NA	NA	NA
hsa-miR-371b-5p	No	No	0	0	0	0.655936	0.449671	0.593506	-0.22612	-0.00535212	0.220768	0.629494	0.992234	0.657043	NA	NA	NA
hsa-miR-372-3p	No	No	1.18074	1.21902	0.681801	1.34783	1.53318	0.883342	-0.130927	-0.48667	-0.355742	0.685646	0.229015	0.338398	NA	0.729392	0.748093
hsa-miR-372-5p	No	No	1.37199	1.39882	1.6139	1.68447	2.32798	1.55016	0.390663	-0.166013	-0.556677	0.248516	0.687663	0.129119	0.735254	0.962808	0.535299
hsa-miR-373-3p	No	No	1.69274	1.10138	1.09594	2.02291	1.5097	2.01529	-0.505076	-0.127923	0.377152	0.125787	0.738338	0.290612	0.593808	0.971498	0.71244
hsa-miR-373-5p	No	No	0.861214	0.531973	0.461977	1.17272	0.905353	0.919277	-0.342311	-0.282746	0.0595648	0.373086	0.534175	0.887613	NA	0.9204	NA
hsa-miR-374a-5p	No	Yes	0	0.651927	0	6.11815	1.77988	0.377013	-1.67839	-3.73908	-2.0607	0.018512	3.46682e-05	0.0142248	0.259562	0.00469466	0.173536
hsa-miR-374b-3p	No	No	0	0	0	0.848478	0.492146	0.738377	-0.859195	-0.0292496	0.829945	0.0639887	0.955839	0.0944265	NA	NA	NA
hsa-miR-374b-5p	No	No	1.41283	1.37802	2.44135	5.40752	2.40028	2.61247	-1.08096	-1.14294	-0.0619764	0.0188044	0.0383173	0.903557	0.261816	0.419152	0.993228
hsa-miR-374c-3p	No	No	0	0	0.491234	0.480893	0.384123	0.632051	-0.277966	0.0979486	0.375915	0.565401	0.859994	0.453474	NA	NA	NA
hsa-miR-374c-5p	No	No	0	0.609508	0.591806	0.433288	0.737494	0.892368	0.682217	0.727702	0.0454851	0.131123	0.157394	0.91531	NA	NA	NA
hsa-miR-375-3p	No	Yes	8.83353	14.78	7.13215	68.8918	83.9547	28.5904	0.460432	-1.51227	-1.9727	0.37348	0.014226	0.000421192	0.830884	0.265716	0.0191423
hsa-miR-375-5p	No	No	1.39919	1.2422	0.982468	1.59504	1.42163	1.51448	-0.228051	-0.124533	0.103519	0.465943	0.736373	0.76013	NA	0.970182	0.953293
hsa-miR-376a-2-5p	No	No	2.74397	2.65987	2.96699	2.98934	2.92757	3.1658	0.0227474	-0.0130524	-0.0357998	0.921244	0.961801	0.883726	0.982695	0.997645	0.990987
hsa-miR-376a-3p	No	No	2.75227	2.28727	1.77934	3.23134	2.55467	2.0793	-0.259448	-0.598358	-0.33891	0.23906	0.0293946	0.184227	0.733987	0.371722	0.617629
hsa-miR-376b-3p	No	No	0	0	0.681801	0.724581	0.525607	0.719784	-0.204604	0.216905	0.42151	0.638731	0.662608	0.344911	NA	NA	NA
hsa-miR-376b-5p	No	Yes	3.53179	2.19791	2.33388	4.23144	2.12679	2.39776	-0.894803	-0.613315	0.281488	0.000339013	0.0391146	0.324256	0.0287025	0.419469	0.730296
hsa-miR-376c-3p	No	No	0	0	0	1.08493	0.837146	0.87906	-0.405455	-0.301256	0.104199	0.417127	0.615335	0.850734	NA	0.946164	NA
hsa-miR-376c-5p	No	No	0.624187	0.651927	0	1.03657	0.897666	0.916338	-0.155794	0.112345	0.268139	0.701241	0.812488	0.532377	NA	0.977782	NA
hsa-miR-377-3p	No	No	0.882948	1.28469	1.22068	1.24697	1.42121	1.38879	0.247671	0.438891	0.191219	0.478941	0.281832	0.590405	NA	0.770854	0.891252
hsa-miR-377-5p	No	No	0.697309	0	0.681801	0.8786	0.576797	0.746331	-0.374875	-0.202442	0.172433	0.353652	0.66329	0.687575	NA	NA	NA
hsa-miR-378a-5p	No	No	0.640108	0.936452	0.591806	1.44955	1.58978	1.44304	0.149917	-0.175864	-0.325781	0.733248	0.735916	0.488205	NA	0.970182	0.84709
hsa-miR-378b	No	No	3.31257	2.36148	2.95903	3.93386	4.25441	3.56782	0.0801962	-0.133497	-0.213693	0.812452	0.741756	0.560015	0.961962	0.9729	0.881265
hsa-miR-378b-5p:Novel	No	No	4.48076	4.66143	5.31292	4.569	5.37066	5.65675	0.22128	0.290814	0.0695338	0.253542	0.201642	0.729491	0.735254	0.702397	0.940705
hsa-miR-378c	No	No	5.31227	5.63206	6.41894	7.14131	8.1229	6.18044	0.222825	-0.211228	-0.434054	0.340069	0.453049	0.0874045	0.815768	0.881341	0.451862
hsa-miR-378c-3p:Novel	No	No	6.62514	6.00074	7.84537	7.23025	8.24865	7.50959	0.0922283	0.0540219	-0.0382064	0.660711	0.829091	0.865514	0.927188	0.978767	0.985598
hsa-miR-378d	No	No	14.6406	13.9214	13.2253	16.7003	16.0793	13.8556	-0.0772247	-0.264251	-0.187026	0.606684	0.143467	0.255345	0.914886	0.638638	0.685961
hsa-miR-378d-1:Novel	No	No	7.85125	7.31336	9.56891	8.32779	7.40954	9.52958	-0.20392	0.226387	0.430307	0.186626	0.202882	0.00776483	0.677003	0.702831	0.125766
hsa-miR-378d-2-3p:Novel	No	Yes	7.09774	7.06359	7.39163	7.52232	7.82221	12.4051	0.0306528	0.800844	0.770191	0.887497	0.00134998	0.000588885	0.976637	0.0645213	0.0235941
hsa-miR-378e	No	No	3.2026	2.53268	2.459	3.13921	3.05025	2.65765	0.0529726	-0.142398	-0.195371	0.814417	0.599795	0.423281	0.96239	0.943798	0.815389
hsa-miR-378e-5p:Novel	No	No	6.77094	7.33407	7.49981	6.57585	7.61483	7.57852	0.15812	0.201648	0.0435277	0.377386	0.341744	0.818083	0.830884	0.806301	0.971554
hsa-miR-378f	No	No	3.38547	3.54223	2.49894	3.99577	3.43214	3.23005	-0.174724	-0.194703	-0.019979	0.419274	0.448188	0.93219	0.845168	0.880567	0.995971
hsa-miR-378f-5p:Novel	No	No	3.94314	4.72707	4.8827	5.16897	5.0656	5.6413	-0.0537726	0.0391793	0.0929519	0.789408	0.86907	0.665504	0.955746	0.983309	0.922712
hsa-miR-378g	No	No	2.64885	2.46333	3.4796	3.29449	3.19419	3.52223	0.0370329	0.12123	0.0841967	0.89191	0.706225	0.771198	0.976637	0.966559	0.957317
hsa-miR-378g-3p:Novel	No	No	0.735102	0.523862	0.491234	0.87376	0.695703	0.691829	-0.327352	-0.261561	0.0657911	0.399929	0.569919	0.876741	NA	NA	NA
hsa-miR-378h	No	No	6.18064	5.10397	7.00163	5.98408	5.70532	7.41846	-0.149917	0.336968	0.486885	0.406868	0.105189	0.00961397	0.845168	0.577381	0.146373
hsa-miR-378h-3p:Novel	No	No	3.37176	2.79741	3.38095	3.86594	3.04624	5.63882	-0.316633	0.335315	0.651948	0.261676	0.297639	0.0265586	0.745705	0.773855	0.243462
hsa-miR-378i	No	No	9.20066	12.9499	10.0607	14.1748	13.5615	10.9956	-0.0317507	-0.438618	-0.406867	0.879158	0.0808586	0.0750558	0.976637	0.53089	0.424805
hsa-miR-378i-3p:Novel	No	No	0.828465	1.26634	1.18361	1.40034	1.38103	1.39682	0.058267	-0.011189	-0.069456	0.858724	0.97681	0.839724	NA	0.998523	0.977743
hsa-miR-378j	No	No	8.58701	9.14171	8.55858	8.93916	10.1924	9.42365	0.136767	0.120501	-0.0162655	0.418156	0.548626	0.928081	0.845168	0.923373	0.995573
hsa-miR-378j-3p:Novel	No	No	3.83279	2.80935	4.14264	4.45547	3.64367	3.98893	-0.25909	-0.187544	0.0715463	0.199186	0.431924	0.744462	0.683664	0.875703	0.945718
hsa-miR-379-3p	No	No	0.809179	0.651927	1.3137	1.05184	1.04578	1.36047	0.0173498	0.308769	0.29142	0.965566	0.507164	0.483113	NA	0.911072	0.843785
hsa-miR-379-5p	No	No	3.54887	3.03492	3.95599	4.05693	3.45558	4.81699	-0.238669	0.22778	0.466449	0.321553	0.412153	0.0653514	0.796278	0.858594	0.390159
hsa-miR-380-3p	No	No	0.766557	0.615833	0.461977	1.20428	0.779895	0.939316	-0.536935	-0.424422	0.112514	0.154745	0.342127	0.789353	NA	0.806301	NA
hsa-miR-380-5p	No	No	2.20838	1.7521	1.84791	2.09151	2.38158	2.10549	0.0775186	0.0703201	-0.00719854	0.770712	0.824062	0.979645	0.950985	0.977782	0.998204
hsa-miR-381-3p	No	No	1.18074	1.17726	1.22068	1.39743	1.19349	1.226	-0.198127	-0.148694	0.0494337	0.512019	0.679308	0.880397	NA	0.962693	0.990987
hsa-miR-381-5p	No	No	1.12392	0.687975	0.491234	1.12921	0.93345	0.862739	-0.257956	-0.306145	-0.0481885	0.474168	0.484156	0.904899	NA	0.903782	NA
hsa-miR-382-3p	No	No	0	0	0.461052	0.704882	0.571131	1.11794	-0.370873	0.679834	1.05071	0.423385	0.178115	0.0214211	NA	NA	NA
hsa-miR-382-5p	No	No	2.2227	1.84977	2.15441	2.68071	2.46311	2.31761	-0.136104	-0.0784968	0.057607	0.571568	0.784631	0.825465	0.900429	0.97765	0.974172
hsa-miR-383-3p	No	No	0	0	0	0.524163	0.423736	0.41547	-0.163858	-0.443727	-0.279869	0.744466	0.464147	0.610921	NA	NA	NA
hsa-miR-383-5p	No	No	3.31386	3.79467	3.74841	4.22101	4.10734	3.34638	-0.08544	-0.22832	-0.14288	0.662915	0.337587	0.509639	0.927188	0.805028	0.860095
hsa-miR-384	No	No	2.4854	2.36148	2.49894	2.78931	3.0602	3.70883	0.0733801	0.481368	0.407988	0.76812	0.0892769	0.104529	0.950075	0.543352	0.49967
hsa-miR-384-5p:Novel	No	No	7.30695	5.48557	7.49981	7.87193	6.57395	7.81094	-0.292148	-0.032816	0.259332	0.111689	0.878863	0.188946	0.566176	0.986974	0.623801
hsa-miR-3907	No	No	7.46317	7.56772	6.76189	7.15897	8.10556	8.09411	0.120495	0.23624	0.115745	0.508632	0.273715	0.54914	0.881495	0.765948	0.880141
hsa-miR-3907-5p:Novel	No	No	5.36688	5.13877	5.2194	6.08365	6.52314	6.56144	0.0726132	0.212459	0.139845	0.734853	0.400324	0.53806	0.939937	0.848698	0.873023
hsa-miR-3908	No	No	12.9469	11.3038	11.0655	13.3912	11.4456	12.0845	-0.1849	-0.175756	0.00914435	0.144554	0.243491	0.947108	0.629181	0.743719	0.997578
hsa-miR-3909	No	No	3.83279	3.00037	3.30724	4.49096	3.20516	3.32334	-0.406832	-0.418112	-0.0112795	0.0480396	0.0904167	0.960961	0.423232	0.547215	0.997578
hsa-miR-3909-5p:Novel	No	No	6.0285	5.00062	5.70572	5.64166	5.26488	6.28564	-0.0639951	0.18316	0.247155	0.682647	0.313023	0.128813	0.929346	0.788616	0.535299
hsa-miR-3910	No	No	7.09774	4.59612	4.66775	7.37037	6.32731	5.40848	-0.262185	-0.295724	-0.0335398	0.230312	0.261774	0.889607	0.724556	0.757417	0.990987
hsa-miR-3910-5p:Novel	No	No	8.95632	6.50904	8.14954	12.0681	8.3369	8.94871	-0.522356	-0.412173	0.110183	0.0157669	0.109694	0.642398	0.238692	0.58437	0.913945
hsa-miR-3911	No	No	10.1564	10.2513	9.33345	11.4657	19.6332	11.3836	0.707453	0.0521225	-0.65533	0.00966268	0.873805	0.026279	0.186575	0.983333	0.243462
hsa-miR-3911-3p:Novel	No	No	3.38547	4.0005	4.74238	4.34961	5.06138	5.34913	0.120634	0.260188	0.139554	0.607993	0.347294	0.573224	0.915839	0.806301	0.88486
hsa-miR-3912-3p	No	Yes	1.39919	1.2966	0.715827	1.9734	1.62734	4.44318	-0.297205	1.20785	1.50505	0.517725	0.0202727	0.00141375	0.887913	0.318291	0.0391407
hsa-miR-3912-5p	No	No	1.10419	0.911424	1.10749	1.35089	1.16988	2.49497	-0.317389	1.0181	1.33549	0.461202	0.0347237	0.00224644	NA	0.405942	0.0547232
hsa-miR-3913-3p	No	No	3.41251	3.00037	2.6274	4.18599	3.12308	3.20237	-0.371805	-0.300171	0.0716341	0.070928	0.21647	0.751012	0.483561	0.717887	0.946627
hsa-miR-3913-5p	No	No	5.32331	4.70906	4.30883	5.9821	4.75565	4.21814	-0.327971	-0.408547	-0.0805761	0.0694499	0.061883	0.691303	0.483561	0.5047	0.929778
hsa-miR-3914	No	No	7.45619	6.29418	5.93398	8.08948	6.94241	7.60879	-0.221933	0.00849125	0.230425	0.263622	0.97106	0.280694	0.748017	0.997645	0.704048
hsa-miR-3914-5p:Novel	No	No	6.10623	7.45322	6.66437	7.00826	8.21124	7.76303	0.206845	0.210933	0.00408807	0.289253	0.361121	0.984207	0.769517	0.816391	0.99842
hsa-miR-3915-3p:Novel	No	No	4.07082	3.00892	3.32247	5.53557	3.70387	3.47765	-0.578965	-0.562572	0.0163938	0.0202653	0.0612703	0.95337	0.270942	0.5047	0.997578
hsa-miR-3916-3p:Novel	No	No	4.12841	3.89426	4.30883	4.18784	4.24512	4.97524	0.0198098	0.232266	0.212456	0.921188	0.31843	0.307192	0.982695	0.791207	0.722125
hsa-miR-3917	No	No	1.74275	1.5181	2.78454	2.1314	2.03121	3.07162	-0.105275	0.405639	0.510914	0.692777	0.170956	0.0542173	0.929409	0.669405	0.35937
hsa-miR-3917-5p:Novel	No	No	11.8074	11.0986	10.7721	12.5839	11.6033	12.6336	-0.0822155	-0.0521371	0.0300784	0.61743	0.789037	0.865028	0.916871	0.97765	0.98546
hsa-miR-3918	No	No	2.94041	2.75604	2.6274	3.11579	3.57676	3.2496	0.192141	-0.0694429	-0.261584	0.424614	0.811897	0.315527	0.848314	0.977782	0.722522
hsa-miR-3918-3p:Novel	No	No	2.75227	3.29687	2.36722	3.1589	3.36655	2.71335	0.0537133	-0.274171	-0.327885	0.802385	0.298903	0.168744	0.957053	0.773855	0.602424
hsa-miR-3919	No	No	2.03541	1.90158	1.6139	2.44431	2.16525	1.99413	-0.211375	-0.226218	-0.0148428	0.419378	0.472458	0.959031	0.845168	0.893765	0.997578
hsa-miR-3919-5p:Novel	No	No	5.55675	5.10397	6.76189	5.71994	6.02486	8.39944	0.00574652	0.67511	0.669363	0.980113	0.0114981	0.00523132	0.994832	0.234556	0.0971303
hsa-miR-3920	No	No	3.38547	4.37345	3.66203	3.67672	4.6399	4.86858	0.326011	0.357933	0.0319216	0.15828	0.185907	0.893371	0.641089	0.685808	0.991007
hsa-miR-3920-5p:Novel	No	No	5.88843	6.37996	6.81801	6.95597	6.32016	6.91117	-0.176957	-0.00360973	0.173347	0.309456	0.985926	0.352691	0.786811	0.998523	0.757899
hsa-miR-3921	No	No	1.92033	1.50446	1.84421	2.39135	1.75066	2.20884	-0.388998	-0.227979	0.161019	0.145569	0.466196	0.580014	0.629181	0.891257	0.887287
hsa-miR-3921-5p:Novel	No	No	6.07336	5.16837	6.64495	7.05607	6.92344	9.74652	-0.0786373	0.591946	0.670583	0.735586	0.0287496	0.00605289	0.939937	0.367859	0.103462
hsa-miR-3922-3p	No	No	4.41474	4.1347	5.93398	5.26911	4.34983	6.11662	-0.252578	0.246821	0.4994	0.267653	0.349787	0.0379759	0.750957	0.806807	0.301137
hsa-miR-3922-5p	No	No	1.32807	1.10138	1.3137	1.3272	1.13492	1.25131	-0.1576	0.044392	0.201992	0.616073	0.902446	0.537871	NA	0.991871	0.873023
hsa-miR-3923	No	No	3.83842	3.75471	4.40966	4.31145	4.52115	4.91524	0.0319852	0.154033	0.122048	0.879061	0.528295	0.577481	0.976637	0.91816	0.886784
hsa-miR-3923-5p:Novel	No	No	5.88081	5.05819	6.24734	6.66054	5.43562	6.56046	-0.265735	-0.0325256	0.233209	0.128765	0.873481	0.213065	0.597135	0.983309	0.650148
hsa-miR-3924	No	No	3.84065	3.25966	3.57914	3.746	3.77876	4.02687	-0.0258437	0.209648	0.235491	0.902848	0.397268	0.289247	0.978178	0.846082	0.712374
hsa-miR-3924-5p:Novel	No	No	6.39737	4.68226	5.47971	6.76184	5.26513	6.07663	-0.410647	-0.154897	0.25575	0.0232971	0.465303	0.193245	0.291048	0.890352	0.624661
hsa-miR-3925-3p	No	No	0.828465	0.936452	0.777959	1.09735	1.12506	0.92752	0.0114021	-0.0238776	-0.0352797	0.973043	0.953313	0.922924	NA	0.997645	0.995573
hsa-miR-3925-5p	No	No	4.92607	3.88452	3.66203	6.31906	10.6146	4.70029	0.532003	-0.223107	-0.75511	0.121405	0.592798	0.0444569	0.582759	0.94256	0.326984
hsa-miR-3926	No	No	2.74397	2.43803	2.76631	2.7496	2.88359	2.72956	0.0286239	0.0967175	0.0680936	0.905308	0.7348	0.789974	0.980254	0.970182	0.962027
hsa-miR-3926-3p:Novel	No	No	1.31438	1.02513	1.3636	1.59288	1.37023	1.35726	-0.256804	-0.0917406	0.165064	0.415574	0.806139	0.630492	NA	0.977782	0.90988
hsa-miR-3927-3p	No	No	4.04589	3.5042	3.57914	4.38547	5.74325	5.5998	0.424098	0.444675	0.0205774	0.163044	0.216775	0.94889	0.644015	0.717887	0.997578
hsa-miR-3927-5p	No	No	0	0	0	0.339167	0.28565	0.168587	-0.00416595	-0.442624	-0.438458	0.994061	0.509598	0.4684	NA	NA	NA
hsa-miR-3928-3p	No	No	2.95564	2.79764	2.13965	3.27574	3.51481	3.80363	0.0842702	0.400057	0.315786	0.784881	0.269808	0.33174	0.954617	0.764496	0.739494
hsa-miR-3928-5p	No	No	0	0	0	2.01154	0.990513	0.649513	-1.11849	-1.52703	-0.408534	0.0344199	0.0202226	0.512499	NA	0.318291	0.860479
hsa-miR-3929	No	No	6.64034	6.15833	6.64495	12.6908	9.52879	12.6492	-0.440485	0.00190248	0.442388	0.167098	0.995978	0.19812	0.649659	0.999681	0.633322
hsa-miR-3934-3p	No	No	2.24784	2.53268	2.44135	3.28041	2.82919	3.05927	-0.27123	0.0579626	0.329192	0.322015	0.857509	0.265175	0.796278	0.982423	0.695802
hsa-miR-3934-5p	No	No	4.36931	3.69955	4.61977	5.30775	5.11972	6.02473	-0.0681344	0.386296	0.45443	0.79005	0.199825	0.0949151	0.955746	0.699064	0.476139
hsa-miR-3935	No	No	3.74512	4.74333	3.69582	5.66202	5.95447	4.43807	0.0511896	-0.306234	-0.357424	0.810233	0.240421	0.130772	0.961627	0.741439	0.536097
hsa-miR-3935-5p:Novel	No	No	6.07336	6.15833	6.2789	10.5799	8.86878	6.89831	-0.232274	-0.644218	-0.411943	0.389565	0.0475153	0.165415	0.843098	0.452722	0.595913
hsa-miR-3936	No	No	4.41676	5.25629	5.89481	7.27549	6.39562	7.13264	-0.212128	0.00234169	0.21447	0.446529	0.994349	0.476151	0.860381	0.999449	0.838698
hsa-miR-3937	No	No	4.72297	4.93273	4.91234	5.82472	6.29882	7.3193	0.135703	0.220022	0.0843186	0.600659	0.470654	0.758632	0.911614	0.893689	0.952591
hsa-miR-3937-5p:Novel	No	No	6.39007	7.39376	7.91197	7.72925	8.24606	8.87468	0.0841675	0.220407	0.136239	0.631385	0.28595	0.461892	0.924781	0.773855	0.832719
hsa-miR-3938	No	No	2.43565	1.87735	1.58079	3.01897	2.27501	1.94214	-0.431549	-0.851901	-0.420352	0.0791771	0.00567964	0.147593	0.497915	0.148916	0.567267
hsa-miR-3938-5p:Novel	No	No	3.94085	2.56938	2.76631	3.95596	9.29532	3.43968	1.12195	-0.0568794	-1.17883	0.0044421	0.905644	0.00589171	0.123256	0.992487	0.10184
hsa-miR-3939	No	No	8.54027	10.4903	7.82911	12.0868	17.2518	16.937	0.445717	0.56616	0.120443	0.14366	0.117518	0.711616	0.628857	0.59584	0.933594
hsa-miR-3939-5p:Novel	No	No	3.92562	5.49478	4.99787	4.49	5.28237	6.52072	0.240584	0.520899	0.280315	0.29608	0.0514249	0.236761	0.773071	0.463131	0.67116
hsa-miR-3940-3p	No	No	0	0	0	0.724666	0.778426	0.645641	0.137595	-0.17216	-0.309755	0.758868	0.749937	0.520907	NA	NA	NA
hsa-miR-3940-5p	No	No	3.28595	2.7519	2.19188	3.07554	3.05851	2.92101	-0.00917025	0.0116458	0.020816	0.967643	0.965357	0.931177	0.992417	0.997645	0.995942
hsa-miR-3941	No	No	4.12841	3.71945	2.85286	5.01036	3.78647	3.45437	-0.426299	-0.526895	-0.100596	0.0673358	0.0620449	0.701454	0.483561	0.5047	0.933113
hsa-miR-3942-3p	No	No	1.10419	0.929863	0.715827	1.10115	1.08979	0.802745	-0.136723	-0.330094	-0.193372	0.680046	0.419599	0.604596	NA	0.862851	0.896298
hsa-miR-3942-5p	No	No	1.27947	0.948667	1.10749	1.48591	1.2204	1.00946	-0.267901	-0.482749	-0.214848	0.408007	0.227343	0.562181	NA	0.728662	0.882053
hsa-miR-3943	No	No	3.37176	3.18042	2.33388	4.03673	4.08655	2.69934	0.000224681	-0.382491	-0.382716	0.999288	0.219495	0.176974	0.999288	0.718612	0.610834
hsa-miR-3943-3p:Novel	No	No	1.37199	1.39214	0.681801	1.96761	1.59837	1.37828	-0.295486	-0.541584	-0.246098	0.347645	0.166958	0.498537	0.815768	0.665408	0.85339
hsa-miR-3944-3p	No	No	3.38547	4.55429	3.42666	4.93622	4.9418	4.37568	-0.0263565	-0.254505	-0.228148	0.910237	0.365408	0.371922	0.981057	0.820717	0.776871
hsa-miR-3944-5p	No	No	0.697309	0.324522	0.681801	0.950806	0.762277	1.01901	-0.30392	0.134735	0.438654	0.429227	0.758319	0.272663	NA	0.975105	NA
hsa-miR-3945	No	No	2.28664	1.84977	2.36722	2.37871	2.22859	3.02441	-0.0616145	0.324011	0.385625	0.792753	0.217936	0.0995685	0.956821	0.717887	0.488932
hsa-miR-3945-3p:Novel	No	No	2.71388	2.7519	2.459	2.97953	3.17294	3.01764	0.118187	0.00331478	-0.114873	0.644437	0.991418	0.677569	0.924876	0.999103	0.925021
hsa-miR-3960-5p:Novel	No	No	3.03668	3.49677	3.16158	3.10047	3.73346	3.03041	0.28091	-0.0826155	-0.363526	0.210293	0.760809	0.130717	0.69549	0.975745	0.536097
hsa-miR-3972	No	No	1.41283	1.06395	1.39227	1.6194	1.36465	1.49753	-0.223534	-0.136718	0.0868162	0.447438	0.692926	0.7842	NA	0.962808	0.958982
hsa-miR-3972-5p:Novel	No	No	4.49568	3.64569	4.15779	4.8511	3.84439	4.78078	-0.267683	-0.0629928	0.20469	0.167069	0.78058	0.324145	0.649659	0.976845	0.730296
hsa-miR-3973	No	Yes	4.4454	3.14317	3.28782	6.36227	3.71519	3.90607	-0.760459	-0.676241	0.0842187	0.000681408	0.0118585	0.740013	0.0357407	0.236443	0.94361
hsa-miR-3973-5p:Novel	No	No	5.48795	6.50904	6.22367	6.66775	6.75965	6.83373	0.0206344	0.00145099	-0.0191834	0.900009	0.994042	0.912613	0.977649	0.999449	0.993963
hsa-miR-3974	No	No	2.36148	1.74018	2.6097	2.8568	2.43224	3.20206	-0.254018	0.316542	0.57056	0.338654	0.29807	0.0394786	0.815499	0.773855	0.307448
hsa-miR-3974-3p:Novel	No	No	2.71388	3.1973	2.459	2.62785	3.12107	3.98162	0.247724	0.633968	0.386244	0.367134	0.0452032	0.165497	0.828678	0.450743	0.595913
hsa-miR-3975	No	No	1.96281	1.29809	1.24947	2.17396	1.47342	1.45875	-0.434576	-0.619469	-0.184893	0.108879	0.066005	0.56036	0.562753	0.505032	0.881352
hsa-miR-3975-5p:Novel	No	No	3.94085	3.39713	3.30724	4.17259	3.7102	3.91932	-0.219132	0.00954968	0.228681	0.279718	0.967907	0.291567	0.758226	0.997645	0.7125
hsa-miR-3976	No	No	8.71373	7.02081	7.91197	9.18561	8.35269	9.57597	-0.131017	0.0998025	0.23082	0.466531	0.636383	0.228572	0.867758	0.951852	0.661455
hsa-miR-3977	No	No	0.828465	1.5181	1.10241	1.5278	1.93308	1.37518	0.436002	-0.0754767	-0.511479	0.178958	0.850786	0.146319	0.666748	0.982423	0.565021
hsa-miR-3977-3p:Novel	No	No	0.697309	0.948667	0.922105	0.97122	1.05982	1.11336	0.059716	0.109054	0.0493381	0.864805	0.791703	0.892671	NA	0.97765	0.990987
hsa-miR-3978	No	No	7.49024	7.6063	7.77959	8.35571	9.1436	8.25482	0.162005	0.0179815	-0.144024	0.375149	0.934229	0.461829	0.830884	0.995339	0.832719
hsa-miR-3978-3p:Novel	No	No	3.2013	2.59781	2.66575	3.8245	3.09698	3.8822	-0.268894	0.158025	0.42692	0.282873	0.585781	0.107196	0.761397	0.939678	0.501877
hsa-miR-409-3p	No	No	1.74275	1.85973	1.33287	3.17829	2.61914	1.97728	-0.357073	-0.829562	-0.472488	0.259297	0.0339484	0.192825	0.741923	0.401444	0.623966
hsa-miR-409-5p	No	No	7.59169	8.27237	7.90396	12.7411	12.3544	9.5959	-0.0518626	-0.439125	-0.387262	0.873394	0.259555	0.27366	0.976637	0.755113	0.70024
hsa-miR-410-3p	No	No	1.31438	0	0.965985	1.60875	1.25581	1.01209	-0.49737	-0.709812	-0.212442	0.199819	0.140874	0.638017	NA	0.637962	0.911432
hsa-miR-410-5p	No	No	3.20054	3.14317	2.96699	3.64048	4.22209	3.0877	0.132329	-0.175913	-0.308242	0.59036	0.557166	0.253364	0.908458	0.928571	0.685608
hsa-miR-411-3p	No	No	0.580915	0	0.681801	0.700182	0.662183	0.66286	-0.0383512	-0.0142122	0.024139	0.923577	0.976162	0.954602	NA	NA	NA
hsa-miR-411-5p	No	No	10.0022	7.52229	5.53746	17.3041	23.357	10.9106	0.419727	-0.812647	-1.23237	0.276137	0.0789369	0.00329536	0.758226	0.529271	0.0712048
hsa-miR-412-3p	No	No	1.11135	1.03367	0.777959	1.68728	1.23025	1.03139	-0.326827	-0.794181	-0.467354	0.332376	0.0653275	0.245997	NA	0.505032	0.68181
hsa-miR-412-5p	No	No	1.21782	1.57159	1.77934	1.98521	1.94747	2.24152	0.0073204	0.159218	0.151898	0.980031	0.636822	0.615265	0.994832	0.951852	0.90168
hsa-miR-421	No	No	1.18074	1.55381	1.09594	2.43756	2.44235	1.70917	0.0657901	-0.554044	-0.619834	0.854633	0.210674	0.123908	0.970631	0.710064	0.532911
hsa-miR-421-5p:Novel	No	No	3.2013	3.00892	2.14748	3.30265	3.27894	3.04142	-0.0306632	-0.0648673	-0.0342041	0.895185	0.815978	0.892033	0.976637	0.977782	0.990987
hsa-miR-422a	No	No	6.89902	4.72707	6.44245	7.72679	5.56648	8.41017	-0.449227	0.000785268	0.450012	0.0325412	0.997434	0.0454379	0.342648	0.999681	0.328643
hsa-miR-422a-3p:Novel	No	No	4.97079	4.6541	4.66506	5.2325	5.32567	5.37765	0.0330689	-0.000547474	-0.0336164	0.852921	0.997937	0.859593	0.970631	0.999681	0.982233
hsa-miR-424-3p	No	No	1.69274	1.90158	1.24947	5.01778	3.00756	2.5977	-0.633259	-1.07254	-0.439281	0.0902655	0.018252	0.296232	0.526415	0.302648	0.716004
hsa-miR-425-3p	No	Yes	4.27013	6.00074	2.28444	15.519	24.4996	4.10731	0.595403	-1.77614	-2.37154	0.198525	0.00165308	3.7955e-06	0.682284	0.0706911	0.000657503
hsa-miR-425-5p	No	Yes	4.72297	4.87969	4.27929	36.4663	17.773	9.46448	-0.830605	-1.98325	-1.15264	0.0654605	0.000247422	0.0193398	0.483561	0.0188264	0.207358
hsa-miR-4251	No	No	0.809179	0	1.10749	1.08638	0.78526	1.05649	-0.332566	-0.0358037	0.296763	0.370375	0.931778	0.440732	NA	0.995162	NA
hsa-miR-4251-5p:Novel	No	No	3.65347	3.03619	3.56608	4.13828	3.50994	4.3751	-0.297587	0.167362	0.464949	0.147189	0.477507	0.0311987	0.629181	0.898145	0.269887
hsa-miR-4252	No	No	1.32807	1.37889	1.18361	1.41586	1.78943	1.33717	0.308393	-0.159598	-0.467992	0.330592	0.682641	0.175508	0.808154	0.962808	0.607986
hsa-miR-4252-5p:Novel	No	No	6.44026	6.89444	7.82911	7.85715	10.5109	8.43206	0.376666	0.0533748	-0.323291	0.0901669	0.84085	0.174679	0.526415	0.980325	0.605806
hsa-miR-4253	No	No	0.766557	1.10138	1.3636	0.918275	1.29	1.26811	0.393931	0.453804	0.0598727	0.280849	0.287055	0.869629	NA	0.773855	0.98733
hsa-miR-4253-5p:Novel	No	No	2.82565	2.43984	2.44135	4.26332	3.68486	3.29487	-0.251935	-0.375125	-0.12319	0.380644	0.280855	0.699533	0.83337	0.770854	0.932609
hsa-miR-4254-5p:Novel	No	No	6.64034	6.00074	4.77261	6.3144	6.21108	5.30164	-0.054349	-0.246042	-0.191693	0.764272	0.264093	0.338792	0.94895	0.757417	0.748093
hsa-miR-4255	No	No	5.68751	5.54249	6.92297	6.96889	7.52644	7.76494	0.0658613	0.11951	0.0536484	0.766469	0.648787	0.820638	0.950075	0.956521	0.971935
hsa-miR-4255-3p:Novel	No	No	1.10419	0.909792	1.09594	1.10491	0.928895	1.10041	-0.234635	-0.07507	0.159565	0.505754	0.856767	0.674836	NA	0.982423	0.925021
hsa-miR-4256	No	No	1.41283	1.82834	2.20483	1.61846	2.14046	3.00247	0.277222	0.750563	0.473341	0.40828	0.0484069	0.155102	0.845168	0.455614	0.582095
hsa-miR-4256-3p:Novel	No	No	2.42754	2.20275	1.77934	3.75516	4.23566	2.23912	0.204229	-0.723089	-0.927318	0.52156	0.0700414	0.0105877	0.890674	0.51256	0.149405
hsa-miR-4257	No	No	6.39007	5.71816	6.13621	6.72852	6.29923	6.22309	-0.132158	-0.153238	-0.0210796	0.488512	0.499518	0.918833	0.877802	0.910715	0.995573
hsa-miR-4257-5p:Novel	No	No	6.10623	6.14917	6.92297	7.26111	7.40889	6.38776	0.0463704	-0.149167	-0.195537	0.836837	0.58111	0.42446	0.96623	0.93949	0.815389
hsa-miR-4258	No	No	5.94527	6.8618	4.66775	6.43169	7.09562	5.30806	0.0746004	-0.358185	-0.432786	0.700696	0.131224	0.0442802	0.930963	0.623977	0.326473
hsa-miR-4258-3p:Novel	No	No	1.4702	2.60771	1.24947	1.9912	3.21481	1.84146	0.588912	-0.0866247	-0.675537	0.0391832	0.805679	0.0284707	0.3821	0.977782	0.25498
hsa-miR-4259	No	No	3.83279	3.79467	4.14264	5.31301	4.80715	4.19943	-0.107981	-0.32972	-0.221739	0.630206	0.223068	0.369541	0.924781	0.722364	0.773902
hsa-miR-4259-5p:Novel	No	No	5.61961	4.09945	4.40966	5.71115	4.02675	4.85829	-0.47018	-0.243512	0.226668	0.00978554	0.2534	0.255544	0.186575	0.748683	0.685961
hsa-miR-4260	No	No	3.48549	3.25313	3.69582	3.7068	3.06152	3.46608	-0.296113	-0.0807207	0.215393	0.150721	0.735464	0.327406	0.629181	0.970182	0.734953
hsa-miR-4260-3p:Novel	No	No	2.43565	3.08295	3.16158	2.65902	3.39278	3.62541	0.354401	0.521311	0.16691	0.147452	0.0659084	0.497957	0.629181	0.505032	0.85339
hsa-miR-4261	No	Yes	1.07338	1.37802	1.55592	1.56501	5.40814	2.17459	1.58778	0.426268	-1.16151	0.00112451	0.470089	0.0244448	0.0494035	0.89347	0.237303
hsa-miR-4261-5p:Novel	No	No	5.31227	4.55712	4.14264	7.23618	5.70397	5.8899	-0.372274	-0.249248	0.123026	0.139849	0.406353	0.655105	0.622707	0.855341	0.920533
hsa-miR-4262	No	No	2.09193	2.33071	2.41496	2.38012	2.73714	2.60597	0.155948	0.19348	0.0375321	0.52644	0.505709	0.883817	0.891316	0.911072	0.990987
hsa-miR-4262-3p:Novel	No	No	1.74275	1.23318	1.22068	1.51297	1.82583	1.43693	0.182856	-0.10294	-0.285795	0.527826	0.773484	0.368279	0.891891	0.976522	0.773573
hsa-miR-4263	No	No	1.74275	3.14519	2.14748	2.31374	3.7763	3.1084	0.744944	0.412014	-0.33293	0.0075602	0.214976	0.244207	0.168887	0.716861	0.678476
hsa-miR-4264	No	No	1.97157	1.79846	1.99931	2.16906	2.13031	1.91321	-0.148374	-0.10844	0.0399339	0.549864	0.712224	0.881295	0.897021	0.967389	0.990987
hsa-miR-4264-3p:Novel	No	No	2.42754	1.87735	1.84421	2.75908	2.2678	2.10723	-0.340419	-0.381501	-0.0410814	0.192116	0.22333	0.887636	0.680975	0.722364	0.990987
hsa-miR-4265-5p:Novel	No	No	7.35102	5.76249	5.51207	7.72929	6.59933	6.69285	-0.224043	-0.232798	-0.00875527	0.198326	0.259991	0.963159	0.682284	0.755113	0.997578
hsa-miR-4266	No	No	1.31438	1.00297	0.715827	1.45316	1.38809	1.11818	-0.154118	-0.227759	-0.0736406	0.650197	0.581293	0.845363	NA	0.93949	0.978757
hsa-miR-4266-5p:Novel	No	No	0.640108	0.501486	0.591806	0.836649	1.04506	1.19997	0.231027	0.588392	0.357365	0.612359	0.263055	0.438088	NA	0.757417	0.818516
hsa-miR-4267	No	No	9.81406	9.30307	7.77959	9.87035	9.19619	7.69817	-0.138816	-0.350222	-0.211406	0.385663	0.0709542	0.233439	0.840172	0.51256	0.666187
hsa-miR-4267-3p:Novel	No	No	1.51834	1.63885	1.55592	2.07074	2.14238	2.10954	0.0162474	0.0757121	0.0594648	0.953724	0.818743	0.841029	0.989581	0.977782	0.977771
hsa-miR-4268	No	No	1.11135	1.23318	0.922105	1.48138	1.60583	1.68484	0.110787	-0.0129751	-0.123762	0.747164	0.974504	0.733039	0.942462	0.997752	0.940827
hsa-miR-4268-5p:Novel	No	No	5.52095	6.20546	5.45441	6.33103	6.54811	6.14968	-0.00921811	-0.0233567	-0.0141385	0.965542	0.927063	0.951182	0.991882	0.994681	0.997578
hsa-miR-4269	No	No	5.1179	5.54932	5.45441	5.31845	5.84195	5.70894	0.111848	0.0128371	-0.0990107	0.524807	0.951015	0.595991	0.890674	0.997645	0.894425
hsa-miR-4269-3p:Novel	No	No	1.39462	1.5181	2.44135	1.9452	1.70229	2.31707	-0.0817109	0.320169	0.40188	0.771854	0.317984	0.161516	0.950985	0.790703	0.59255
hsa-miR-4270	No	No	5.52095	4.87607	5.47971	5.96208	6.68598	6.14834	0.0886965	0.107793	0.0190966	0.695318	0.689888	0.937435	0.929821	0.962808	0.996331
hsa-miR-4270-3p:Novel	No	No	1.37199	1.5181	1.3137	1.48218	2.02302	1.58402	0.501141	0.296238	-0.204903	0.113719	0.43454	0.531739	0.570179	0.87835	0.870728
hsa-miR-4271	No	No	2.28664	2.35453	1.77542	2.53806	3.32137	2.78572	0.206365	0.186853	-0.019512	0.497935	0.610047	0.952412	0.877802	0.94544	0.997578
hsa-miR-4271-5p:Novel	No	No	2.62876	3.72661	3.32247	4.08163	5.8149	3.41077	0.538963	-0.222516	-0.76148	0.0647169	0.533101	0.017116	0.483561	0.9204	0.194369
hsa-miR-4272	No	No	2.65614	1.92704	1.77934	3.73598	2.92562	2.28627	-0.410479	-0.572737	-0.162258	0.169541	0.117415	0.632024	0.654623	0.59584	0.910854
hsa-miR-4272-5p:Novel	No	No	1.11135	1.3982	1.14222	1.50109	1.77877	1.62372	0.333955	0.0707929	-0.263162	0.345252	0.868207	0.48576	0.815768	0.983309	0.846189
hsa-miR-4273	No	No	8.09179	6.36854	7.90396	8.46914	7.72188	8.72187	-0.14158	-0.0181219	0.123458	0.445053	0.934073	0.535705	0.860381	0.995339	0.873023
hsa-miR-4273-3p:Novel	No	No	1.74275	1.2422	1.84791	1.87603	3.45138	1.84383	0.655761	-0.00330845	-0.659069	0.0963973	0.994522	0.123077	0.538354	0.999449	0.530835
hsa-miR-4274	No	No	1.97157	2.43984	2.21498	4.98769	4.13019	2.70459	-0.289566	-0.919544	-0.629978	0.370858	0.0204211	0.0844197	0.829865	0.319079	0.446281
hsa-miR-4274-5p:Novel	No	No	10.9604	8.35286	8.81932	10.7945	9.01299	8.26395	-0.261338	-0.258393	0.00294518	0.2038	0.293972	0.989567	0.691959	0.773855	0.99842
hsa-miR-4275	No	No	6.13246	6.55539	6.22367	6.70784	7.43385	6.98763	0.0933224	0.0242161	-0.0691063	0.593285	0.907273	0.711176	0.910099	0.992487	0.933474
hsa-miR-4275-3p:Novel	No	No	1.97157	1.74018	1.99931	2.11365	1.94295	2.13492	-0.181891	0.0777097	0.259601	0.46746	0.788885	0.324041	0.867758	0.97765	0.730296
hsa-miR-4276	No	Yes	3.9842	3.18899	3.16158	4.36523	24.2909	4.10098	2.21218	0.0830946	-2.12909	1.25557e-06	0.88081	1.61452e-05	0.000413711	0.987512	0.00158588
hsa-miR-4276-3p:Novel	No	No	2.94041	2.79764	2.6097	3.43064	4.29982	3.52488	0.325603	0.112823	-0.212779	0.243544	0.735953	0.475564	0.734725	0.970182	0.838698
hsa-miR-4277	No	No	5.31227	4.92666	5.45441	5.73233	5.87971	5.7176	0.0414426	0.00833165	-0.0331109	0.846567	0.973926	0.885525	0.969397	0.997752	0.990987
hsa-miR-4277-3p:Novel	No	Yes	3.48655	4.25198	3.57914	6.46206	8.49931	3.26704	0.380709	-1.05563	-1.43634	0.248055	0.00994642	0.000114608	0.735254	0.218605	0.00726857
hsa-miR-4278	No	No	0	0.642346	0.461977	1.34058	4.58227	1.78934	1.07169	0.350709	-0.720982	0.106	0.661631	0.312263	0.558701	0.959784	0.722522
hsa-miR-4278-5p:Novel	No	No	2.78924	2.43803	2.89795	3.87863	3.13743	3.54611	-0.370441	-0.209597	0.160844	0.197356	0.538355	0.607879	0.682284	0.9204	0.899442
hsa-miR-4279	No	No	1.97043	1.62656	2.03738	3.07636	2.23809	2.15553	-0.50998	-0.356994	0.152985	0.108853	0.351802	0.667753	0.562753	0.807456	0.922712
hsa-miR-4280-3p:Novel	No	No	7.47273	4.77063	3.28782	8.56297	10.2051	5.46828	0.289545	-0.573073	-0.862618	0.404794	0.173212	0.0236786	0.845168	0.672216	0.231838
hsa-miR-4281	No	No	1.06753	1.02513	1.14222	1.71679	1.40972	1.4407	-0.300507	-0.344853	-0.0443459	0.405539	0.426903	0.911896	NA	0.868234	0.993963
hsa-miR-4281-5p:Novel	No	No	2.275	2.20275	2.66575	2.83539	2.91184	2.96424	-0.000993324	0.119186	0.120179	0.996989	0.700272	0.666078	0.998563	0.965995	0.922712
hsa-miR-4282	No	No	2.74397	2.75604	4.15779	3.96051	3.5385	4.17617	-0.166832	-0.0102818	0.15655	0.499192	0.971604	0.551847	0.877802	0.997645	0.880283
hsa-miR-4282-5p:Novel	No	Yes	4.59934	2.65987	3.30724	4.66423	3.05137	6.08531	-0.603927	0.517675	1.1216	0.0140236	0.0589579	1.03304e-05	0.227741	0.498993	0.00116504
hsa-miR-4283	No	Yes	5.80915	5.5928	4.77261	13.6159	6.90804	6.48221	-0.994606	-0.977212	0.0173938	0.000269657	0.0029085	0.954411	0.0277908	0.0996535	0.997578
hsa-miR-4283-3p:Novel	No	No	2.95564	3.2245	4.17681	3.56603	3.84903	4.03884	0.0601261	0.129094	0.0689683	0.768422	0.585689	0.743517	0.950075	0.939678	0.945306
hsa-miR-4284	No	No	9.79431	8.62166	7.85361	10.6754	11.1335	8.9582	0.0495565	-0.328939	-0.378496	0.819434	0.207307	0.10986	0.96284	0.705679	0.506957
hsa-miR-4284-3p:Novel	No	No	1.69274	1.3982	1.7398	1.96987	2.1001	1.9618	0.127095	0.104265	-0.0228302	0.66472	0.764966	0.941435	0.927188	0.976113	0.996608
hsa-miR-4285-3p:Novel	No	No	1.35694	2.02328	1.18361	1.67517	3.03415	1.63607	0.734286	-0.209953	-0.944239	0.0171369	0.58436	0.00483528	0.251	0.939678	0.0931728
hsa-miR-4286	No	No	6.85993	5.06536	6.44245	6.81862	5.80469	6.77722	-0.250377	-0.0322534	0.218124	0.203965	0.889102	0.302674	0.691959	0.991281	0.71891
hsa-miR-4286-3p:Novel	No	No	3.03668	2.33071	2.6097	4.2291	2.43251	3.01284	-0.817936	-0.418297	0.399639	0.00156613	0.168605	0.16576	0.062273	0.665408	0.595913
hsa-miR-4287	No	No	6.88068	4.92666	6.10338	8.78172	5.92341	8.53219	-0.55821	-0.0872198	0.47099	0.0117251	0.735951	0.048593	0.203339	0.970182	0.335551
hsa-miR-4287-3p:Novel	No	No	0.861214	0	0.681801	0.976168	0.754023	1.69946	-0.333185	0.55007	0.883255	0.482151	0.292316	0.0631195	NA	0.773855	0.383631
hsa-miR-4288	No	No	3.23672	3.49677	3.28782	3.11204	3.39869	3.36504	0.113611	0.0691661	-0.044445	0.574104	0.773706	0.834783	0.900797	0.976522	0.975783
hsa-miR-4288-5p:Novel	No	No	3.92562	3.49677	2.66575	3.83147	3.76885	3.05092	-0.114425	-0.305309	-0.190884	0.560122	0.202281	0.382626	0.897021	0.702831	0.784842
hsa-miR-4289	No	No	4.30607	2.75604	2.21498	4.17479	3.87616	2.84754	-0.0526482	-0.57364	-0.520992	0.845725	0.0834434	0.0854357	0.968965	0.532792	0.446996
hsa-miR-4289-3p:Novel	No	Yes	1.69274	2.28727	2.13965	2.15264	2.82014	9.71106	0.391304	2.1355	1.74419	0.309861	9.07903e-07	4.74896e-06	0.786811	0.000421526	0.000761084
hsa-miR-429	No	No	3.12093	2.78429	3.42666	6.27137	4.79492	3.43234	-0.416137	-0.799984	-0.383847	0.205787	0.0458825	0.297401	0.692008	0.450812	0.716004
hsa-miR-429-5p:Novel	No	No	2.74397	1.82834	2.20483	3.22994	2.46218	2.26379	-0.406014	-0.425571	-0.0195565	0.159694	0.221479	0.951696	0.642002	0.721249	0.997578
hsa-miR-4290	No	No	5.32331	4.39583	3.88979	5.55055	6.10781	4.62483	0.0548336	-0.202497	-0.257331	0.829258	0.509766	0.355129	0.965941	0.911072	0.759922
hsa-miR-4290-5p:Novel	No	No	6.5719	6.3317	6.46324	7.29808	6.63668	6.30259	-0.207134	-0.287623	-0.0804892	0.243744	0.177642	0.680854	0.734725	0.678422	0.925021
hsa-miR-4291	No	No	4.11596	2.78959	3.23384	3.59224	3.55545	3.38245	-0.0852108	-0.187282	-0.102071	0.730586	0.526411	0.704367	0.938969	0.916964	0.933113
hsa-miR-4291-3p:Novel	No	No	3.03668	3.03492	3.22781	3.21356	3.59406	4.75188	0.190444	0.691433	0.500989	0.506991	0.0380315	0.090574	0.881395	0.418428	0.462748
hsa-miR-4292	No	No	0	0.531973	0.461052	0.772921	0.815784	0.657503	0.390059	0.0379014	-0.352158	0.399857	0.946122	0.473254	NA	0.997645	NA
hsa-miR-4292-5p:Novel	No	No	1.96281	1.50446	1.14222	2.08392	1.82421	1.43541	-0.22507	-0.567835	-0.342765	0.433187	0.112276	0.300189	0.85215	0.586842	0.717506
hsa-miR-4293	No	No	2.13507	2.12789	2.6274	2.6724	2.38287	2.59231	-0.224389	-0.0885526	0.135836	0.298369	0.726516	0.557278	0.775642	0.969544	0.880735
hsa-miR-4293-5p:Novel	No	No	3.94085	3.76795	3.42666	4.49971	3.77789	4.16117	-0.334016	-0.0925033	0.241513	0.127643	0.720327	0.310301	0.596572	0.967889	0.722522
hsa-miR-4294	No	No	3.2026	1.85973	1.55592	3.46774	3.27115	1.81949	-0.138074	-0.893988	-0.755914	0.701404	0.0454675	0.065475	0.930963	0.450743	0.390159
hsa-miR-4294-3p:Novel	No	No	1.18074	1.09336	1.3137	1.63042	1.39553	1.48202	-0.2708	-0.260945	0.00985505	0.39127	0.480279	0.976939	NA	0.901209	0.997578
hsa-miR-4295	No	No	3.65863	2.27165	2.459	3.74418	2.64812	2.83208	-0.490406	-0.276072	0.214333	0.020597	0.269694	0.361137	0.272833	0.764496	0.768457
hsa-miR-4295-3p:Novel	No	No	4.2935	4.1946	3.99862	3.94383	8.86567	4.31376	1.04503	0.190344	-0.854686	0.0012276	0.626609	0.0135497	0.0521926	0.9503	0.172497
hsa-miR-4296	No	No	7.49024	7.56772	7.82911	8.61601	9.46835	8.15416	0.110079	-0.130736	-0.240815	0.54757	0.551301	0.223944	0.896518	0.924399	0.657719
hsa-miR-4296-3p:Novel	No	No	12.1377	12.3327	11.6694	13.6416	12.7621	13.3869	-0.086538	-0.0638979	0.0226401	0.635486	0.76845	0.908571	0.924781	0.976522	0.993749
hsa-miR-4297	No	No	2.275	2.19791	1.99931	2.66299	3.77209	2.44218	0.443199	-0.220599	-0.663798	0.113258	0.518974	0.0291587	0.570179	0.916666	0.258105
hsa-miR-4297-3p:Novel	No	No	1.16183	1.00297	1.18361	1.66903	1.46336	1.59744	-0.237328	-0.202143	0.0351848	0.482895	0.615849	0.924248	0.876352	0.946341	0.995573
hsa-miR-4298	No	No	2.275	2.36353	3.11183	2.93463	2.79543	2.91272	-0.170189	-0.147127	0.0230622	0.483765	0.610609	0.930374	0.876352	0.94544	0.995942
hsa-miR-4298-3p:Novel	No	No	3.48549	3.63917	3.22781	4.47351	5.36973	3.88541	0.379779	-0.034544	-0.414323	0.209059	0.924716	0.206261	0.693181	0.994483	0.638278
hsa-miR-4299	No	No	2.09193	2.12599	2.15441	2.30148	2.56629	2.41188	0.136107	0.0833732	-0.0527338	0.543327	0.75527	0.822688	0.896518	0.975105	0.973226
hsa-miR-4299-5p:Novel	No	No	12.421	9.75938	9.13776	12.7505	10.5879	10.4384	-0.298921	-0.183067	0.115854	0.0389369	0.28833	0.464813	0.3821	0.773855	0.835018
hsa-miR-4300	No	No	4.55001	3.79902	3.88979	4.50735	4.21893	4.02237	-0.107865	-0.208504	-0.100638	0.552858	0.33961	0.612536	0.897021	0.80597	0.901199
hsa-miR-4300-5p:Novel	No	No	6.99594	5.65192	5.79591	10.2955	8.07776	6.64547	-0.411896	-0.534958	-0.123062	0.0820678	0.0611687	0.639299	0.501393	0.5047	0.911432
hsa-miR-4301	No	No	2.94041	2.18673	2.33388	3.0562	2.1799	2.90198	-0.497434	-0.0584069	0.439027	0.0304159	0.824837	0.0755246	0.334068	0.977782	0.425087
hsa-miR-4301-3p:Novel	No	No	1.11135	1.23167	1.09594	1.42339	1.72547	0.966401	0.297701	-0.644369	-0.94207	0.34015	0.106465	0.00850647	NA	0.578613	0.134907
hsa-miR-4302-3p:Novel	No	No	1.77444	2.06392	1.97799	1.75962	3.47523	2.28039	0.796543	0.524779	-0.271764	0.0229003	0.209862	0.453661	0.290246	0.70973	0.828031
hsa-miR-4303	No	No	8.61214	6.50904	7.91197	10.7182	9.57603	9.30179	-0.274507	-0.0600846	0.214422	0.184636	0.807959	0.342402	0.674833	0.977782	0.752014
hsa-miR-4303-3p:Novel	No	No	0.828465	0.642346	0.713215	0.986905	0.871017	0.857928	-0.138196	-0.130927	0.00726952	0.702307	0.763584	0.985317	NA	0.975745	NA
hsa-miR-4304	No	No	0.985213	1.37889	1.33287	1.27127	2.02569	1.78215	0.723355	0.321346	-0.40201	0.0474401	0.460435	0.284359	0.42105	0.888311	0.707414
hsa-miR-4304-3p:Novel	No	No	2.65614	2.36148	2.33388	2.81525	2.59357	2.33137	-0.110005	-0.218431	-0.108426	0.610851	0.407099	0.650803	0.916871	0.855822	0.917723
hsa-miR-4305	No	No	8.87218	7.50941	7.75244	11.7419	8.8387	8.81713	-0.413779	-0.366147	0.0476324	0.032627	0.114034	0.823294	0.342648	0.590146	0.973565
hsa-miR-4305-3p:Novel	No	No	9.44594	8.2557	10.4388	10.3767	10.0225	11.7966	-0.0485873	0.154555	0.203142	0.794799	0.481871	0.307092	0.956828	0.901602	0.722125
hsa-miR-4306	No	No	3.03668	3.695	3.68842	3.21406	3.9021	4.02592	0.263781	0.313468	0.0496872	0.194662	0.186751	0.809829	0.680987	0.685997	0.971096
hsa-miR-4306-5p:Novel	No	No	9.7426	11.7347	10.1432	10.8444	12.7668	11.7072	0.267227	0.172936	-0.094291	0.0776719	0.337616	0.557417	0.497915	0.805028	0.880735
hsa-miR-4307	No	No	3.33405	2.55199	1.96494	3.23943	3.24913	2.28001	-0.00984023	-0.612367	-0.602527	0.965159	0.0321147	0.021188	0.991882	0.390909	0.218703
hsa-miR-4307-5p:Novel	No	No	8.52477	6.96072	5.99368	8.89528	7.01127	6.5608	-0.345069	-0.407192	-0.0621231	0.0264005	0.0304559	0.721695	0.309915	0.37924	0.93734
hsa-miR-4308	No	No	7.08445	7.23572	8.35361	7.77341	7.98436	7.40619	0.0414746	-0.0642995	-0.105774	0.812289	0.757799	0.574118	0.961962	0.975105	0.88486
hsa-miR-4308-5p:Novel	No	No	4.88116	4.92666	5.01079	6.07058	5.79229	6.01306	-0.126874	-0.00948535	0.117389	0.559325	0.970554	0.61538	0.897021	0.997645	0.90168
hsa-miR-4309	No	No	6.66811	5.90371	7.67159	7.08202	6.35064	7.73867	-0.165487	0.0874326	0.25292	0.268978	0.612918	0.10689	0.751761	0.945958	0.501877
hsa-miR-431-3p	No	No	1.1375	1.26634	0.965985	1.64684	1.51856	1.40223	-0.0754646	-0.342102	-0.266637	0.822812	0.403565	0.475432	NA	0.853992	0.838698
hsa-miR-431-5p	No	No	0.985213	0.531973	0.922105	1.03629	0.99206	1.07882	-0.0566299	-0.0309249	0.025705	0.885055	0.946269	0.950519	NA	0.997645	0.997578
hsa-miR-4310	No	No	1.12392	1.03367	0.666437	1.43412	1.30693	1.26956	-0.133427	-0.23805	-0.104622	0.690047	0.548067	0.772312	NA	0.923373	0.957514
hsa-miR-4310-5p:Novel	No	No	2.32366	2.59617	2.78454	2.67635	3.06039	2.90647	0.206635	0.198759	-0.00787682	0.352828	0.448523	0.972612	0.817213	0.880567	0.997578
hsa-miR-4311	No	No	7.08445	5.10397	5.47971	8.36625	7.91157	5.99728	-0.156298	-0.395698	-0.2394	0.511439	0.169177	0.362256	0.883926	0.666454	0.7703
hsa-miR-4311-3p:Novel	No	No	5.33767	5.00062	4.07477	5.92674	6.13933	5.09163	0.064038	-0.237669	-0.301707	0.751634	0.333012	0.174469	0.944715	0.799585	0.605803
hsa-miR-4312	No	No	2.29967	2.19815	1.4737	2.86403	2.79455	2.75948	-0.0909534	-0.0392059	0.0517475	0.761835	0.911984	0.872361	0.948138	0.993733	0.988958
hsa-miR-4312-5p:Novel	No	No	2.65614	2.12599	1.58079	2.66326	2.54281	1.97897	-0.100912	-0.432349	-0.331438	0.664749	0.137187	0.213059	0.927188	0.636031	0.650148
hsa-miR-4313	No	No	5.61961	6.29039	8.61765	6.48036	7.33856	9.82406	0.146672	0.584136	0.437464	0.491953	0.0182264	0.047712	0.877802	0.302648	0.332792
hsa-miR-4313-3p:Novel	No	No	2.20838	2.09806	2.66575	2.50365	2.40623	3.29927	-0.110793	0.267985	0.378778	0.642292	0.325315	0.121961	0.924876	0.793452	0.53053
hsa-miR-4314	No	No	4.19756	4.04655	3.66203	5.61713	4.74751	4.3836	-0.294269	-0.366838	-0.0725694	0.170361	0.157075	0.761361	0.654623	0.655362	0.953384
hsa-miR-4314-3p:Novel	No	No	3.92562	3.03619	4.09081	4.55543	3.76698	3.98016	-0.275541	-0.25411	0.021431	0.241971	0.361877	0.933342	0.734725	0.816391	0.996116
hsa-miR-4315	No	No	3.54223	4.81582	3.56608	5.14001	7.71283	4.09721	0.569511	-0.254838	-0.824348	0.0326203	0.435232	0.00480556	0.342648	0.87835	0.0931728
hsa-miR-4315-3p:Novel	No	No	5.07821	4.66143	3.9411	5.16444	4.6513	4.74926	-0.0834248	-0.137538	-0.0541133	0.644174	0.524056	0.782447	0.924876	0.916964	0.957643
hsa-miR-4316	No	No	6.40108	4.89547	6.24734	9.20621	8.34147	8.05727	-0.0975531	-0.167546	-0.0699929	0.733832	0.623933	0.821642	0.939937	0.949503	0.972367
hsa-miR-4316-3p:Novel	No	Yes	8.43213	7.00839	8.35098	8.09641	9.93897	16.0772	0.140093	1.03726	0.897163	0.563544	0.000246978	0.000402919	0.897575	0.0188264	0.0188752
hsa-miR-4317	No	No	5.79926	6.36854	6.45562	8.22381	8.61007	7.75562	0.0790438	-0.142012	-0.221056	0.746853	0.627272	0.403764	0.942462	0.9503	0.80184
hsa-miR-4317-3p:Novel	No	No	0.65719	0	0	0.617652	0.618083	0.647672	0.117434	0.181502	0.064068	0.793036	0.728228	0.889383	NA	NA	NA
hsa-miR-4318	No	No	4.11596	4.09945	3.9411	4.9001	3.91355	4.39049	-0.290427	-0.14224	0.148187	0.216827	0.60997	0.562761	0.701641	0.94544	0.882053
hsa-miR-4318-5p:Novel	No	No	4.4454	3.80315	4.74238	4.41884	4.86259	5.18542	0.145474	0.304536	0.159062	0.56262	0.303923	0.548797	0.897021	0.777375	0.880141
hsa-miR-4319	No	No	4.8713	3.71945	4.56888	5.61618	5.84328	5.09897	0.0291595	-0.167421	-0.19658	0.910252	0.589674	0.484728	0.981057	0.941911	0.84488
hsa-miR-4319-3p:Novel	No	No	1.74275	1.55137	1.96494	1.86408	1.88807	1.98705	0.0398035	0.0350218	-0.00478164	0.888122	0.917091	0.987326	0.976637	0.994481	0.99842
hsa-miR-432-3p	No	No	3.65863	3.5042	3.68842	3.65507	4.50659	4.07524	0.311871	0.167741	-0.144129	0.179081	0.54516	0.556867	0.666748	0.9204	0.880735
hsa-miR-432-5p	No	No	2.32366	2.04972	1.99931	2.46478	2.12369	2.53761	-0.211891	0.0984863	0.310377	0.429974	0.749249	0.268969	0.849639	0.9729	0.696434
hsa-miR-4320	No	No	2.58364	3.72661	3.66203	3.31955	3.8043	3.90689	0.248635	0.155014	-0.0936211	0.26945	0.557696	0.688339	0.751761	0.928571	0.928663
hsa-miR-4320-5p:Novel	No	No	3.12093	3.65705	4.29496	4.20813	6.87573	4.57839	0.636195	0.156593	-0.479602	0.0238059	0.643764	0.110385	0.294612	0.956521	0.506971
hsa-miR-4321	No	No	4.06641	4.13666	3.57914	5.53462	5.81303	4.12769	0.0354583	-0.374379	-0.409837	0.896505	0.258997	0.173775	0.976637	0.755113	0.605803
hsa-miR-4321-5p:Novel	No	No	4.4454	4.74333	4.84171	5.17965	5.26368	5.0878	0.0194377	-0.0102748	-0.0297125	0.920428	0.964453	0.886238	0.982695	0.997645	0.990987
hsa-miR-4322	No	No	2.82565	2.48441	3.55867	3.50154	3.48681	3.46324	-0.0626451	-0.0777195	-0.0150743	0.819957	0.812383	0.959545	0.96284	0.977782	0.997578
hsa-miR-4322-5p:Novel	No	No	2.79838	3.25313	3.11183	3.17441	5.7103	3.54291	0.769753	0.1641	-0.605652	0.0171396	0.673244	0.0785551	0.251	0.961555	0.434173
hsa-miR-4323	No	No	3.48655	3.79902	3.74841	4.04787	5.46322	4.41476	0.421614	0.11787	-0.303744	0.101936	0.702361	0.267829	0.5497	0.966559	0.695854
hsa-miR-4323-5p:Novel	No	No	2.71388	2.05027	2.19188	3.67606	3.79431	2.90277	-0.0664039	-0.376689	-0.310285	0.821482	0.290463	0.339505	0.96284	0.773855	0.749125
hsa-miR-4324	No	No	0	0.531973	0.491234	0.564929	0.733796	0.68215	0.239489	0.39591	0.156421	0.556296	0.405868	0.703883	NA	NA	NA
hsa-miR-4324-5p:Novel	No	No	2.55895	2.06735	3.22781	3.03753	2.9802	2.94957	0.0480451	-0.040431	-0.0884761	0.850579	0.894556	0.747324	0.970631	0.991492	0.946254
hsa-miR-4325	No	No	6.39007	4.92666	4.73445	5.84402	5.50969	5.05385	-0.132429	-0.312203	-0.179774	0.479676	0.166576	0.3837	0.876352	0.665408	0.784842
hsa-miR-4325-3p:Novel	No	No	5.50454	5.70473	5.91806	6.89065	7.49853	10.04	0.103917	0.597693	0.493776	0.690337	0.0502362	0.0719843	0.929346	0.458898	0.415925
hsa-miR-4326	No	Yes	1.18074	1.78874	1.58079	2.12507	7.03994	1.81303	1.70226	-0.262286	-1.96455	0.000259347	0.648588	0.000116965	0.0277908	0.956521	0.00726857
hsa-miR-4326-5p:Novel	No	No	6.24187	6.19477	5.53746	8.74092	8.28056	7.96199	-0.0377616	-0.300307	-0.262545	0.882194	0.324177	0.342922	0.976637	0.793444	0.752014
hsa-miR-4327	No	No	7.30695	8.3505	7.99724	9.20723	10.4025	9.1697	0.164466	-0.103429	-0.267896	0.458566	0.696076	0.262509	0.865268	0.964546	0.692157
hsa-miR-4327-3p:Novel	No	No	5.91471	5.78111	3.74841	8.26319	7.55119	5.18053	-0.163258	-0.577896	-0.414638	0.50084	0.0514432	0.126644	0.877802	0.463131	0.535195
hsa-miR-4328	No	No	1.18074	0.899229	0.461977	1.29634	1.02021	0.778461	-0.362407	-0.693009	-0.330601	0.287392	0.100437	0.402898	NA	0.570184	0.800798
hsa-miR-4328-5p:Novel	No	No	3.2026	3.19184	2.14748	3.2377	3.58649	3.24196	0.0865056	0.17144	0.0849339	0.706577	0.528797	0.726413	0.934539	0.91854	0.939647
hsa-miR-4329	No	No	3.41251	3.10762	2.459	3.59355	3.58401	3.12794	-0.0230778	-0.22433	-0.201252	0.914796	0.391411	0.396403	0.982695	0.84372	0.793067
hsa-miR-4329-5p:Novel	No	No	5.1179	4.59612	5.44571	5.93846	5.73872	5.92419	-0.0836219	-0.011115	0.0725069	0.67201	0.962087	0.732504	0.929203	0.997645	0.940827
hsa-miR-433-3p	No	No	2.94041	1.90158	4.09081	3.45043	2.8971	3.71329	-0.208142	0.0726498	0.280792	0.451745	0.821409	0.338574	0.860865	0.977782	0.748093
hsa-miR-433-5p	No	No	1.11135	1.37802	1.3137	1.12353	1.31011	1.68596	0.21687	0.399756	0.182886	0.499966	0.282014	0.569582	NA	0.770854	0.883601
hsa-miR-4330	No	No	9.10002	10.63	11.868	13.5548	14.223	14.9131	0.0431843	0.00704214	-0.0361422	0.860401	0.980701	0.890955	0.971729	0.998523	0.990987
hsa-miR-4330-5p:Novel	No	No	5.48795	4.06641	4.66506	5.70527	4.66159	5.17374	-0.284438	-0.130336	0.154102	0.111537	0.536304	0.426893	0.566176	0.9204	0.815401
hsa-miR-4418	No	No	1.72243	1.82834	1.77542	2.00793	2.2891	2.05847	0.192598	0.0792777	-0.11332	0.479537	0.8057	0.690798	0.876352	0.977782	0.929778
hsa-miR-4418-5p:Novel	No	No	10.6466	10.2486	10.8072	10.9923	10.8678	11.2172	-0.0617529	0.00364374	0.0653966	0.700189	0.98469	0.70404	0.930963	0.998523	0.933113
hsa-miR-4420	No	No	3.48655	2.78959	4.38377	3.58998	3.53239	4.21798	0.0361452	0.251972	0.215827	0.881172	0.370488	0.391966	0.976637	0.822797	0.788895
hsa-miR-4420-5p:Novel	No	No	5.55675	5.39538	4.3495	5.86933	5.99919	5.53722	0.00141254	-0.159393	-0.160805	0.994587	0.523546	0.477604	0.998375	0.916964	0.838698
hsa-miR-4421	No	No	4.41676	3.75471	2.03738	6.77976	5.99236	4.4792	-0.216267	-0.572227	-0.35596	0.499833	0.139444	0.314245	0.877802	0.637962	0.722522
hsa-miR-4421-5p:Novel	No	No	5.07821	4.54896	4.66506	6.43229	5.39733	5.1971	-0.363173	-0.266265	0.0969078	0.106715	0.322737	0.695991	0.558701	0.793444	0.930817
hsa-miR-4422	No	No	2.95564	3.5104	3.16158	3.38411	3.64297	3.30216	0.09398	-0.0946868	-0.188667	0.644064	0.696408	0.38436	0.924876	0.964546	0.784842
hsa-miR-4422-3p:Novel	No	No	5.31227	4.09712	4.61052	6.04179	5.2301	5.16219	-0.266551	-0.344858	-0.0783075	0.191053	0.157601	0.727314	0.680975	0.655362	0.940412
hsa-miR-4423-3p	No	No	0	0	0	0.34749	0.683054	0.249383	0.490953	0.0517572	-0.439196	0.383576	0.939118	0.465766	NA	NA	NA
hsa-miR-4423-5p	No	No	1.07338	1.09896	1.3137	1.50158	1.37318	1.58109	-0.291967	-0.190697	0.10127	0.358234	0.607052	0.767157	NA	0.944254	0.95448
hsa-miR-4424	No	No	8.39513	7.1712	9.56891	8.8434	7.86988	9.49672	-0.115936	0.117705	0.233641	0.493745	0.550878	0.191694	0.877802	0.924399	0.623966
hsa-miR-4424-3p:Novel	No	No	4.4454	3.89426	4.8827	4.94265	5.21698	6.4342	0.10925	0.358232	0.248982	0.672027	0.23219	0.354848	0.929203	0.731927	0.759853
hsa-miR-4425	No	No	3.2013	2.43803	2.44135	3.01324	2.98197	2.4878	-0.0337833	-0.381913	-0.34813	0.876131	0.152102	0.151118	0.976637	0.651245	0.573757
hsa-miR-4425-5p:Novel	No	No	2.65614	2.33071	3.22781	3.18133	3.15592	2.76918	-0.0747184	-0.108279	-0.0335609	0.767878	0.721027	0.902979	0.950075	0.967889	0.993228
hsa-miR-4426	No	No	5.3659	4.55429	2.76631	5.48956	4.92171	3.79247	-0.147908	-0.410489	-0.262581	0.4969	0.12449	0.283502	0.877802	0.614292	0.707296
hsa-miR-4426-3p:Novel	No	No	6.88068	6.79427	5.45441	7.85225	8.58496	6.8073	0.165616	-0.259113	-0.42473	0.424526	0.301606	0.0608693	0.848314	0.77549	0.377136
hsa-miR-4427	No	No	3.74512	3.4309	4.3495	4.40137	4.12414	5.46117	-0.133643	0.361121	0.494763	0.576584	0.191645	0.0479789	0.90196	0.690516	0.332792
hsa-miR-4427-5p:Novel	No	No	3.39235	1.63885	2.15441	3.818	3.08962	4.01676	-0.289293	-0.143514	0.145778	0.388237	0.716516	0.686705	0.842299	0.967889	0.927692
hsa-miR-4428	No	No	2.78924	3.21173	3.16158	3.47513	3.9612	2.72274	0.201035	-0.321772	-0.522807	0.411846	0.288668	0.0554987	0.845168	0.773855	0.363875
hsa-miR-4428-5p:Novel	No	No	3.54887	3.2245	3.16158	3.90978	3.69247	3.98086	-0.0140748	-0.104902	-0.0908271	0.947933	0.681532	0.694147	0.987649	0.962808	0.930077
hsa-miR-4429	No	No	4.27013	4.10053	4.29496	7.3489	4.73013	5.23289	-0.618075	-0.420274	0.1978	0.01421	0.161392	0.477445	0.2284	0.659228	0.838698
hsa-miR-4429-3p:Novel	No	No	2.29967	2.12599	2.86331	2.82174	2.77144	3.11483	0.0366048	0.186726	0.150122	0.884404	0.524644	0.567521	0.976637	0.916964	0.883601
hsa-miR-4430-3p:Novel	No	No	5.50454	4.68226	6.13621	5.31455	5.48473	6.33159	0.0520312	0.243525	0.191493	0.816473	0.353872	0.417345	0.96284	0.809591	0.812023
hsa-miR-4431-3p:Novel	No	No	4.30607	3.80315	4.66775	5.31006	4.99121	4.3616	-0.113213	-0.254132	-0.140918	0.570983	0.291468	0.521495	0.900429	0.773855	0.86611
hsa-miR-4432	No	No	5.14571	4.31614	4.73445	5.38563	4.56927	4.73026	-0.273124	-0.229322	0.043802	0.111393	0.259631	0.815331	0.566176	0.755113	0.971096
hsa-miR-4432-5p:Novel	No	No	2.94041	3.10273	2.41496	3.46085	4.4482	3.0852	0.209596	-0.0656147	-0.27521	0.465798	0.851215	0.381293	0.867758	0.982423	0.784842
hsa-miR-4433a-3p	No	No	1.18074	1.26634	1.6139	1.36778	1.75153	2.01504	0.283283	0.451772	0.168488	0.351125	0.193438	0.574215	0.817059	0.693136	0.88486
hsa-miR-4433a-5p	No	No	1.16183	1.18177	1.14222	1.37613	1.16517	1.29902	-0.125633	-0.0735966	0.0520365	0.684112	0.838651	0.873735	NA	0.979381	0.989309
hsa-miR-4433b-3p	No	No	0.735102	1.07483	0.715827	1.01868	1.15886	0.905144	-0.0428481	-0.0255031	0.017345	0.896278	0.948907	0.961282	NA	0.997645	0.997578
hsa-miR-4433b-5p	No	No	1.10419	0.899229	1.09594	1.74484	1.52568	1.77369	-0.104993	0.122606	0.227598	0.779432	0.778949	0.565236	0.952961	0.976845	0.882186
hsa-miR-4434	No	No	13.2554	12.9994	14.3178	17.8234	16.3023	16.2598	-0.147392	-0.0767927	0.0705994	0.505813	0.77099	0.768367	0.881221	0.976522	0.95458
hsa-miR-4434-3p:Novel	No	No	2.55895	2.18673	1.97799	3.19296	3.06853	1.77224	-0.0938005	-0.543815	-0.450014	0.733109	0.117031	0.157129	0.939937	0.595228	0.587788
hsa-miR-4435	No	No	6.08912	5.54932	7.77959	6.88472	7.17713	7.95708	0.0309145	0.21176	0.180845	0.879465	0.376549	0.401706	0.976637	0.825209	0.799473
hsa-miR-4435-3p:Novel	No	No	4.72297	3.74581	3.40901	4.75426	4.38016	3.66466	-0.0534477	-0.317874	-0.264426	0.807753	0.234969	0.278111	0.95998	0.734985	0.702384
hsa-miR-4436a	No	No	2.13507	2.27165	2.36722	2.37853	2.65186	2.95324	0.121457	0.300732	0.179275	0.603862	0.262763	0.447057	0.912181	0.757417	0.824024
hsa-miR-4436a-5p:Novel	No	No	2.03541	1.87735	2.20483	2.30572	2.16922	2.61585	-0.0343738	0.26211	0.296484	0.889249	0.35767	0.243595	0.976637	0.813455	0.678015
hsa-miR-4436b-3p	No	No	2.4854	2.73427	2.76631	3.43764	3.60035	2.90574	0.0472712	-0.134101	-0.181372	0.842124	0.639523	0.482497	0.967955	0.954684	0.843399
hsa-miR-4436b-5p	No	No	5.29769	4.04655	3.86394	5.40194	4.30639	4.11377	-0.295556	-0.401422	-0.105865	0.0917967	0.0588723	0.590873	0.529907	0.498993	0.891252
hsa-miR-4437	No	No	0	0.799326	0.715827	0.592616	0.89205	1.04566	0.532302	0.77385	0.241548	0.209652	0.105705	0.546006	NA	0.577381	NA
hsa-miR-4437-5p:Novel	No	No	1.82932	1.3982	1.24947	2.01651	2.31064	1.41302	0.038092	-0.279386	-0.317478	0.912315	0.514291	0.413705	0.98212	0.913858	0.809484
hsa-miR-4438	No	No	5.80915	4.72297	5.53746	6.44911	6.45303	6.00441	-0.00642077	-0.00987616	-0.00345539	0.977425	0.970932	0.988765	0.994832	0.997645	0.99842
hsa-miR-4438-5p:Novel	No	No	12.7154	11.6536	8.86341	58.324	40.2821	55.5384	-0.521163	-0.199285	0.321878	0.239207	0.704867	0.500048	0.733987	0.966559	0.853502
hsa-miR-4439	No	No	2.20838	2.78959	2.30989	2.65096	3.08298	2.7464	0.166147	0.0969729	-0.0691737	0.539905	0.766201	0.812247	0.896518	0.976522	0.971096
hsa-miR-4439-3p:Novel	No	No	0.624187	0.399663	0	0.758617	0.913851	0.563661	0.221166	-0.328247	-0.549413	0.587031	0.512975	0.21835	NA	0.913017	NA
hsa-miR-4440	No	No	1.77444	2.06735	1.3137	1.91901	2.23548	2.0341	0.215679	0.238884	0.0232058	0.442517	0.475022	0.937081	0.860232	0.896008	0.996303
hsa-miR-4440-5p:Novel	No	No	4.60033	4.74333	4.66775	6.07891	5.86654	5.10299	-0.0542078	-0.128597	-0.0743891	0.833258	0.677199	0.790898	0.966175	0.962434	0.962027
hsa-miR-4441	No	No	4.23848	4.1347	3.32247	4.81373	6.07894	4.51122	0.361093	-0.0794225	-0.440515	0.148588	0.791936	0.101996	0.629181	0.97765	0.493088
hsa-miR-4442	No	No	1.12392	0.629039	0.777959	1.1056	1.05906	1.05259	0.0185672	-0.00656821	-0.0251355	0.959884	0.988145	0.949452	NA	0.998956	0.997578
hsa-miR-4442-5p:Novel	No	No	3.33405	2.48441	3.28782	3.22285	2.98648	4.20775	-0.152489	0.354471	0.506959	0.510613	0.181356	0.0342219	0.883186	0.679938	0.285136
hsa-miR-4443-3p:Novel	No	Yes	0	0.651927	1.22068	0.430196	1.01048	2.07724	0.989581	1.91036	0.920777	0.0258665	6.04937e-05	0.0135958	NA	0.00656006	0.172497
hsa-miR-4444	No	No	1.41283	1.37889	1.38316	1.91424	2.00773	1.71364	-0.00524938	-0.145578	-0.140328	0.985672	0.677803	0.65744	0.996572	0.962434	0.922712
hsa-miR-4444-5p:Novel	No	No	2.2227	3.08295	3.42666	3.30312	3.76204	3.67537	0.197952	0.116692	-0.0812608	0.386656	0.666027	0.734741	0.84126	0.960758	0.940827
hsa-miR-4445-3p	No	No	0.65719	0.909792	0.777959	0.903847	1.22035	1.01115	0.326825	0.268996	-0.0578298	0.416124	0.574502	0.89002	NA	0.936375	0.990987
hsa-miR-4445-5p	No	No	1.35694	1.94713	2.78454	3.00389	27.7609	128.86	0.659666	1.24575	0.586083	0.691898	0.527648	0.742193	0.929409	0.917647	0.944494
hsa-miR-4446-3p	No	No	1.16183	0.399663	0.923954	1.30913	0.832316	1.08203	-0.740488	-0.267578	0.47291	0.0370742	0.510407	0.225281	NA	0.911072	0.658331
hsa-miR-4446-5p	No	No	0	0.250743	0.923954	0.562832	0.672425	1.03001	0.284932	0.830412	0.54548	0.511042	0.0829368	0.178846	NA	NA	NA
hsa-miR-4447	No	No	4.30607	5.37417	4.66506	7.17209	5.59854	5.67333	-0.357545	-0.272834	0.0847115	0.140339	0.345519	0.749786	0.623833	0.806301	0.946254
hsa-miR-4447-5p:Novel	No	No	4.72297	3.65705	3.16158	5.56675	3.99982	3.87791	-0.456506	-0.44652	0.00998569	0.0312345	0.0802347	0.966515	0.338491	0.529941	0.997578
hsa-miR-4448	No	No	2.71388	3.43987	2.86331	4.66099	4.40811	3.1926	0.0379066	-0.552658	-0.590564	0.890453	0.101031	0.0543582	0.976637	0.570184	0.35937
hsa-miR-4448-5p:Novel	No	No	2.28664	3.00892	3.28782	3.0658	3.18785	3.19881	0.0953451	0.101426	0.00608065	0.649049	0.67838	0.977588	0.925808	0.962434	0.997907
hsa-miR-4449	No	No	1.11135	1.03367	0.461977	1.14636	1.07152	0.929194	-0.180574	-0.397127	-0.216553	0.608575	0.353625	0.58191	NA	0.809591	0.887287
hsa-miR-4449-5p:Novel	No	No	7.94654	7.08445	6.45562	7.90316	9.78047	8.99921	0.315423	0.193441	-0.121982	0.174656	0.484427	0.622958	0.662588	0.903782	0.906743
hsa-miR-4450	No	No	2.94041	3.48036	3.11183	3.92213	3.87372	3.03196	-0.00941294	-0.324579	-0.315166	0.968784	0.270425	0.2392	0.992486	0.764771	0.672983
hsa-miR-4450-3p:Novel	No	No	0.67847	0.696072	0.461052	0.645937	1.14232	0.998128	0.844731	0.719188	-0.125543	0.0563593	0.164939	0.770508	NA	0.665408	NA
hsa-miR-4451	No	No	3.48549	2.73427	3.55867	3.61652	4.33157	3.93602	0.155711	0.159935	0.00422461	0.569199	0.622922	0.988439	0.900429	0.949503	0.99842
hsa-miR-4451-5p:Novel	No	No	2.95564	2.73427	4.07477	3.35911	3.31389	4.41084	-0.0427685	0.388387	0.431156	0.833491	0.090612	0.0345706	0.966175	0.54722	0.286832
hsa-miR-4452	No	No	4.12841	3.28009	3.95599	4.30182	4.08957	4.94154	-0.0496698	0.225656	0.275326	0.818292	0.371145	0.225589	0.96284	0.822797	0.658597
hsa-miR-4452-5p:Novel	No	No	5.29769	5.88632	5.01079	5.93271	7.05275	6.8265	0.242787	0.146802	-0.0959857	0.233611	0.544805	0.657207	0.727802	0.9204	0.922712
hsa-miR-4453	No	No	7.31726	5.5038	6.56851	8.7188	6.58444	6.94654	-0.368296	-0.313544	0.0547522	0.0453684	0.15226	0.786461	0.411659	0.651245	0.960214
hsa-miR-4453-3p:Novel	No	No	1.16183	2.04972	1.99931	1.57428	2.67405	2.03892	0.62006	0.253962	-0.366097	0.0326155	0.463334	0.217056	0.342648	0.889746	0.650753
hsa-miR-4454-3p:Novel	No	No	0	0	0	0.759347	0.868885	0.603357	0.109054	-0.384432	-0.493487	0.81094	0.495097	0.330547	NA	0.908044	NA
hsa-miR-4455	No	No	4.41676	3.03492	4.61052	7.04779	5.10407	4.83318	-0.606727	-0.349585	0.257142	0.0225118	0.271082	0.381607	0.288063	0.764771	0.784842
hsa-miR-4455-3p:Novel	No	No	2.03541	2.78959	2.03738	2.32161	3.2842	2.38922	0.365688	0.0772976	-0.28839	0.181995	0.81539	0.323806	0.672194	0.977782	0.730296
hsa-miR-4456	No	No	1.21782	1.27599	0.922105	1.75398	1.66109	0.966132	-0.00852944	-0.760488	-0.751959	0.978939	0.0662091	0.0478022	NA	0.505117	0.332792
hsa-miR-4456-3p:Novel	No	No	0	0	0	0.584065	0.449459	0.471476	-0.203227	-0.538513	-0.335286	0.69314	0.385261	0.552079	NA	NA	NA
hsa-miR-4457	No	No	1.07338	1.17726	0.982468	1.02234	1.40136	1.15838	0.428542	0.233836	-0.194705	0.22432	0.577512	0.590508	NA	0.937519	0.891252
hsa-miR-4457-5p:Novel	No	No	2.90458	3.28009	3.40901	3.32915	5.15092	5.22629	0.599896	0.788024	0.188129	0.04874	0.02703	0.548153	0.423232	0.35885	0.880141
hsa-miR-4458	No	No	6.44026	4.55429	5.54372	6.68361	5.15831	5.88426	-0.442285	-0.143062	0.299224	0.0164836	0.509475	0.136877	0.246879	0.911072	0.548274
hsa-miR-4458-3p:Novel	No	No	2.43565	2.14967	2.78454	2.608	2.57071	2.96329	-0.0381754	0.102679	0.140855	0.895477	0.762164	0.645571	0.976637	0.975745	0.916013
hsa-miR-4460	No	No	2.14675	2.60771	2.28444	2.64605	2.82586	2.49326	0.0857608	-0.0833682	-0.169129	0.697852	0.753014	0.47422	0.93047	0.974242	0.838698
hsa-miR-4460-3p:Novel	No	No	13.65	10.7909	12.9112	17.0506	23.9236	20.5721	0.347364	0.361943	0.0145791	0.269505	0.333482	0.965608	0.751761	0.799585	0.997578
hsa-miR-4462	No	No	0	0.642346	0.591806	0.708504	0.767311	1.04981	0.264132	0.659529	0.395397	0.515877	0.146316	0.305974	NA	0.640049	NA
hsa-miR-4462-5p:Novel	No	No	2.71388	2.43984	2.49894	3.72659	4.69451	3.88914	0.285302	-0.0740439	-0.359346	0.398781	0.854812	0.323852	0.844676	0.982423	0.730296
hsa-miR-4463	No	No	5.57847	4.1946	4.66506	5.60841	4.79496	6.46296	-0.296711	0.163987	0.460698	0.195613	0.538434	0.058705	0.680987	0.9204	0.370669
hsa-miR-4463-5p:Novel	No	No	6.77094	7.95104	7.11735	7.06311	8.88803	8.9906	0.293866	0.318078	0.0242126	0.122044	0.154726	0.903026	0.582759	0.652216	0.993228
hsa-miR-4464	No	No	8.89081	8.09311	8.86341	10.0847	10.2023	13.3693	0.0126896	0.507254	0.494564	0.953917	0.0492427	0.0335109	0.989581	0.458898	0.280331
hsa-miR-4464-3p:Novel	No	No	1.53311	1.55381	2.21498	2.46461	2.27258	2.29227	-0.0823831	-0.15156	-0.0691774	0.79487	0.687753	0.84012	0.956828	0.962808	0.977743
hsa-miR-4465	No	No	2.29967	2.14967	1.4737	2.58819	2.51701	1.90769	0.00403059	-0.419388	-0.423419	0.987533	0.189038	0.144809	0.996572	0.687217	0.56171
hsa-miR-4465-5p:Novel	No	No	1.82932	1.25808	1.10241	1.69819	1.40691	1.53502	-0.237938	-0.00586041	0.232078	0.395966	0.985752	0.438692	NA	0.998523	0.818516
hsa-miR-4466	No	Yes	3.2026	3.89426	4.40966	7.69443	24.8214	5.13457	1.61305	-0.450362	-2.06341	0.000564634	0.426636	5.23389e-05	0.0352047	0.868234	0.00370632
hsa-miR-4466-3p:Novel	No	No	0.65719	1.01164	0.461052	1.41803	1.95173	0.871673	0.441288	-0.670458	-1.11175	0.356093	0.267238	0.0413357	0.819792	0.75983	0.315457
hsa-miR-4467	No	No	2.74397	2.45827	1.4737	3.07628	2.88797	1.96646	-0.0889721	-0.55954	-0.470568	0.690859	0.0485061	0.070705	0.929346	0.455614	0.413888
hsa-miR-4467-3p:Novel	No	No	1.10419	1.17726	1.10749	2.54178	2.07361	1.34457	-0.337201	-0.845108	-0.507908	0.404547	0.0914751	0.2724	0.845168	0.547919	0.698737
hsa-miR-4468	No	No	1.87256	2.75604	2.19188	2.11596	2.81304	2.43659	0.315495	0.0387411	-0.276754	0.186537	0.892492	0.26843	0.677003	0.991492	0.695892
hsa-miR-4468-5p:Novel	No	No	2.29967	3.18042	3.38095	2.6066	3.17907	3.81697	0.231581	0.464365	0.232785	0.307565	0.071396	0.297623	0.786811	0.51256	0.716004
hsa-miR-4469	No	No	1.37199	1.18177	1.09594	1.41995	1.91597	1.03196	0.320661	-0.666226	-0.986887	0.334019	0.120249	0.0105717	0.811159	0.604033	0.149405
hsa-miR-4469-5p:Novel	No	No	4.49568	4.37345	4.30883	5.00493	5.79018	5.19178	0.211515	-0.00714676	-0.218662	0.405622	0.981241	0.423509	0.845168	0.998523	0.815389
hsa-miR-4470	No	No	1.18074	1.2966	1.3636	2.69073	2.34935	1.39242	-0.19268	-0.956977	-0.764296	0.612328	0.0445896	0.0818486	0.916871	0.450743	0.444198
hsa-miR-4470-5p:Novel	No	No	8.90097	9.24886	7.91197	11.3631	13.4858	10.3278	0.193946	-0.0886908	-0.282637	0.420552	0.758781	0.278856	0.845707	0.975105	0.702384
hsa-miR-4471	No	No	1.12392	0.819424	1.24947	1.33024	1.28143	1.35134	0.0812346	0.150419	0.069184	0.797086	0.687566	0.834726	NA	0.962808	0.975783
hsa-miR-4471-5p:Novel	No	No	3.74512	3.54223	3.56608	5.49652	4.1632	4.67154	-0.449534	-0.270118	0.179416	0.0710637	0.361273	0.511644	0.483561	0.816391	0.860397
hsa-miR-4472	No	No	7.77946	7.85793	7.67159	7.70804	10.0173	7.27328	0.321127	0.0157697	-0.305357	0.0822487	0.943701	0.125661	0.501393	0.997645	0.534566
hsa-miR-4472-1-5p:Novel	No	No	4.41676	3.88979	3.9411	4.55775	5.7305	4.39526	0.269287	-0.00554305	-0.27483	0.283463	0.985347	0.309333	0.761397	0.998523	0.722522
hsa-miR-4473	No	No	3.03668	3.03492	1.77934	4.25559	3.38771	2.24057	-0.308759	-0.815313	-0.506554	0.187229	0.00572596	0.0652112	0.677003	0.148916	0.390114
hsa-miR-4474-3p	No	Yes	3.03668	2.20275	2.66575	4.64998	11.6166	2.45025	1.0458	-1.00595	-2.05175	0.0181265	0.0630358	2.75957e-05	0.258388	0.505032	0.00221129
hsa-miR-4474-5p	No	No	1.39919	1.2422	0.922105	1.66785	1.70421	0.896773	-0.0792358	-0.832333	-0.753097	0.777621	0.0257309	0.0290178	NA	0.353563	0.257607
hsa-miR-4475	No	No	0.65719	0	0.482992	1.00233	0.527634	0.832443	-0.656352	-0.254504	0.401849	0.120479	0.608005	0.389301	NA	NA	NA
hsa-miR-4475-5p:Novel	No	No	2.62876	3.00037	2.86331	4.69538	3.84019	2.73213	-0.29074	-0.651102	-0.360362	0.305249	0.0611516	0.260718	0.785778	0.5047	0.69188
hsa-miR-4476	No	No	5.80915	4.13406	6.24734	10.0064	8.82468	6.55399	-0.195994	-0.500714	-0.30472	0.523917	0.176031	0.366198	0.890674	0.675442	0.773573
hsa-miR-4476-5p:Novel	No	No	3.38547	3.18899	3.43864	3.54902	3.52037	3.60403	-0.0254079	-0.0866163	-0.0612083	0.901197	0.721022	0.779673	0.977967	0.967889	0.957514
hsa-miR-4477a	No	No	2.78924	1.82285	2.33388	3.95786	2.55036	2.85712	-0.615888	-0.407516	0.208373	0.0229026	0.203713	0.488286	0.290246	0.702831	0.84709
hsa-miR-4477b-3p:Novel	No	No	0.67847	1.21902	1.09594	1.11646	1.3827	1.02974	0.283515	-0.188856	-0.47237	0.431763	0.666769	0.224443	NA	0.961217	0.657719
hsa-miR-4477b-5p:Novel	No	No	1.21782	1.07483	1.22068	2.39139	1.41729	1.58574	-0.755906	-0.50972	0.246186	0.0359561	0.233218	0.542717	0.365947	0.733036	0.876034
hsa-miR-4478-3p:Novel	No	No	1.97043	1.59021	1.77934	4.24252	2.81909	2.07083	-0.583372	-1.06833	-0.484957	0.0997422	0.0144514	0.232165	0.547358	0.268383	0.665045
hsa-miR-4479	No	No	1.35694	1.25808	1.58079	1.76191	1.5752	2.05113	-0.141583	0.192207	0.33379	0.643236	0.581211	0.289104	0.924876	0.93949	0.712374
hsa-miR-4479-5p:Novel	No	No	2.2227	1.87735	1.43165	2.84733	2.41987	2.29995	-0.187896	-0.284425	-0.0965281	0.546224	0.447866	0.778502	0.896518	0.880567	0.957514
hsa-miR-448	No	No	3.28595	3.25313	3.30724	3.5864	3.75267	3.43588	0.0880334	-0.0911006	-0.179134	0.675164	0.717167	0.426586	0.929203	0.967889	0.815401
hsa-miR-448-5p:Novel	No	No	4.36931	3.27769	4.14264	4.03507	4.20051	3.72291	-0.0218434	-0.0469513	-0.0251079	0.922521	0.861148	0.917619	0.982695	0.982423	0.995573
hsa-miR-4480	No	No	3.03668	2.59617	2.459	3.28026	2.79722	2.71831	-0.214779	-0.371289	-0.15651	0.401832	0.225812	0.578666	0.845168	0.727343	0.886784
hsa-miR-4480-5p:Novel	No	No	1.61836	1.28469	1.10241	1.96418	1.82263	1.30135	-0.16915	-0.603461	-0.434311	0.551357	0.086965	0.182117	0.897021	0.539358	0.615477
hsa-miR-4481	No	No	2.36148	3.18899	2.76631	2.95624	3.32769	3.53213	0.0606556	0.191346	0.130691	0.776029	0.443819	0.555985	0.951448	0.87835	0.880735
hsa-miR-4481-3p:Novel	No	No	0.697309	0	0	0.785416	0.332515	0.430302	-1.01998	-0.617335	0.402647	0.0330756	0.283972	0.456045	NA	NA	NA
hsa-miR-4482-3p	No	No	1.11135	1.55137	1.22068	1.32291	1.7672	1.36065	0.228778	-0.0999537	-0.328732	0.42987	0.779364	0.297121	0.849639	0.976845	0.716004
hsa-miR-4482-5p	No	No	3.53179	3.65705	4.07477	6.18037	5.39411	5.02004	-0.230637	-0.347372	-0.116735	0.406424	0.295522	0.700577	0.845168	0.773855	0.933113
hsa-miR-4483	No	No	2.62876	2.80935	2.7272	3.73426	3.40362	3.04177	-0.105405	-0.406143	-0.300738	0.645725	0.143981	0.236945	0.924881	0.638638	0.67116
hsa-miR-4483-5p:Novel	No	No	1.10419	0.752229	0.988996	1.10609	1.11777	0.98603	-0.0780721	-0.207094	-0.129021	0.814696	0.602646	0.72049	NA	0.943798	0.937202
hsa-miR-4484	No	No	1.53311	1.18177	0.922105	1.73814	2.00728	1.17604	0.126332	-0.616541	-0.742873	0.692209	0.130192	0.0447887	0.929409	0.623977	0.328162
hsa-miR-4484-5p:Novel	No	No	4.2935	3.91156	3.57914	4.23424	4.41074	7.83451	0.0619132	0.813643	0.75173	0.83214	0.0151418	0.0122598	0.966175	0.278027	0.163129
hsa-miR-4485-3p	No	No	1.69274	1.26634	1.24947	2.78712	3.19992	1.69559	0.398255	-0.826482	-1.22474	0.385142	0.143451	0.0168233	0.840172	0.638638	0.193309
hsa-miR-4485-5p	No	No	0	0	0	0.6514	0.706131	0.697224	0.143813	0.183574	0.0397611	0.767467	0.747155	0.937263	NA	NA	NA
hsa-miR-4486	No	No	3.31257	2.75817	2.20483	3.7134	4.01354	2.52793	0.000610368	-0.500593	-0.501204	0.997878	0.0834196	0.0574223	0.998563	0.532792	0.369183
hsa-miR-4486-3p:Novel	No	No	1.11135	0.899229	0	1.15858	1.1085	0.499133	-0.105556	-1.06031	-0.954755	0.760088	0.0226837	0.0271218	NA	0.330592	NA
hsa-miR-4487	No	No	1.21782	1.063	0.715827	1.40291	1.52018	1.07882	0.192248	-0.453793	-0.646041	0.595613	0.315234	0.112753	NA	0.78983	0.509855
hsa-miR-4487-5p:Novel	No	No	3.44486	2.36148	2.459	3.88531	2.82707	2.67437	-0.468351	-0.480191	-0.0118405	0.0551854	0.101357	0.965511	0.444858	0.570184	0.997578
hsa-miR-4488	No	No	12.421	12.9484	11.2973	12.878	18.2443	11.0328	0.499215	-0.189949	-0.689165	0.0335466	0.502539	0.00692505	0.348145	0.911072	0.114602
hsa-miR-4488-3p:Novel	No	No	0	0.615833	0.713215	0.626758	0.828742	1.00473	0.392143	0.484173	0.0920308	0.356621	0.320787	0.825335	NA	0.792147	NA
hsa-miR-4489-3p:Novel	No	No	2.75227	3.2245	2.76631	4.04559	4.45926	2.87922	0.121341	-0.448493	-0.569834	0.676608	0.209082	0.0785351	0.929203	0.70973	0.434173
hsa-miR-4490	No	No	1.39919	1.55137	1.7398	1.69385	2.03385	1.85037	0.277569	0.109897	-0.167672	0.348714	0.756745	0.591374	0.815768	0.975105	0.891305
hsa-miR-4490-5p:Novel	No	No	5.50454	6.55516	6.0893	8.50278	7.5376	7.43151	-0.206447	-0.235026	-0.0285791	0.373504	0.396354	0.910043	0.830884	0.844692	0.993963
hsa-miR-4491	No	No	3.22013	2.09806	2.85286	2.87119	2.37683	2.82961	-0.327062	-0.0996646	0.227398	0.146692	0.706625	0.352323	0.629181	0.966559	0.757644
hsa-miR-4491-5p:Novel	No	No	2.36148	1.88397	2.28444	3.28909	2.40746	2.67628	-0.348317	-0.207886	0.140432	0.154835	0.477537	0.604177	0.636845	0.898145	0.896298
hsa-miR-4492	No	No	3.48549	3.0754	2.96699	4.08269	4.60806	3.68705	0.155631	-0.243731	-0.399362	0.526913	0.412693	0.136673	0.89149	0.858594	0.548274
hsa-miR-4492-5p:Novel	No	No	8.87218	11.4095	9.70152	10.2711	12.8603	10.3585	0.308799	0.0219647	-0.286834	0.148526	0.931608	0.212668	0.629181	0.995162	0.650148
hsa-miR-4493	No	No	2.71388	3.48036	1.55592	3.65708	4.0429	2.558	0.036767	-0.435616	-0.472383	0.882624	0.155817	0.0905227	0.976637	0.653682	0.462748
hsa-miR-4493-5p:Novel	No	Yes	7.72934	4.64932	6.46324	27.5739	27.9519	13.8527	0.556152	-1.14387	-1.70002	0.257336	0.0514397	0.00141395	0.73905	0.463131	0.0391407
hsa-miR-4494	No	No	4.72297	5.25629	6.10338	8.11952	6.99524	6.08351	-0.271492	-0.078474	0.193018	0.263385	0.787109	0.467246	0.748017	0.97765	0.836824
hsa-miR-4494-5p:Novel	No	No	13.2807	12.2914	9.98501	14.3894	12.7768	11.6313	-0.147075	-0.289959	-0.142884	0.335096	0.114438	0.394282	0.811159	0.590356	0.791407
hsa-miR-4495-3p:Novel	No	No	0.766557	0.399663	0.666437	0.857406	0.839063	0.962778	-0.220067	0.142075	0.362143	0.582413	0.756566	0.384024	NA	0.975105	NA
hsa-miR-4496	No	No	5.55675	5.73597	6.45562	7.99038	6.58491	7.08778	-0.288505	-0.0889739	0.199531	0.143324	0.703402	0.351563	0.628857	0.966559	0.757614
hsa-miR-4496-5p:Novel	No	No	1.65693	1.59021	2.13965	1.91437	1.99728	2.63998	0.0115622	0.356281	0.344718	0.963331	0.209839	0.169091	0.991543	0.70973	0.602424
hsa-miR-4497	No	No	7.96251	10.6267	6.81801	10.2034	19.2287	10.2471	0.892353	-0.0274249	-0.919778	0.0016289	0.935791	0.00261423	0.062273	0.996174	0.0606591
hsa-miR-4497-3p:Novel	No	No	5.61961	5.06536	2.49894	8.7787	9.81983	4.16763	0.134324	-0.930484	-1.06481	0.675007	0.0179422	0.00292352	0.929203	0.302648	0.0654568
hsa-miR-4498	No	No	5.66425	5.90884	4.91234	6.77299	6.12494	6.88789	-0.105271	-0.182783	-0.0775116	0.580126	0.416233	0.704971	0.902532	0.860194	0.933113
hsa-miR-4498-3p:Novel	No	No	0	0	0	0.485051	0.758831	0.855129	0.428808	0.366951	-0.0618565	0.361711	0.502178	0.895827	NA	NA	NA
hsa-miR-4499	No	No	3.44486	3.57748	4.3495	4.96928	6.56486	7.38368	0.300348	0.630965	0.330618	0.373005	0.111985	0.353205	0.830884	0.586842	0.757934
hsa-miR-4499-3p:Novel	No	No	3.2026	3.64569	3.42666	3.64415	4.03724	3.47589	0.0493976	-0.182967	-0.232365	0.800218	0.443462	0.279495	0.956828	0.87835	0.702384
hsa-miR-449a	No	No	6.7847	7.5359	6.24734	13.3144	9.46429	16.4223	-0.513911	0.249855	0.763767	0.101974	0.499401	0.0233927	0.5497	0.910715	0.23052
hsa-miR-449a-3p:Novel	No	No	1.10419	1.03367	1.18361	1.16445	1.2515	1.08821	0.0491775	-0.0220425	-0.0712201	0.87501	0.952903	0.82997	NA	0.997645	0.974172
hsa-miR-449b-3p	No	No	0.65719	1.09896	1.24947	0.98271	1.18039	1.13695	0.107833	0.125003	0.0171694	0.778012	0.780973	0.965735	NA	0.976845	0.997578
hsa-miR-449b-5p	No	No	1.11135	1.37595	1.14222	1.37286	2.22224	1.20487	0.609743	-0.0203044	-0.630048	0.0904962	0.963422	0.104083	0.526596	0.997645	0.49967
hsa-miR-449c-3p	No	No	1.37199	1.30385	1.33287	1.80583	1.73123	1.76801	-0.0471006	0.178377	0.225478	0.885687	0.641569	0.513179	0.976637	0.956029	0.860479
hsa-miR-449c-5p	No	No	1.92033	1.87735	1.58079	2.32706	2.06661	2.26463	-0.190882	0.0154428	0.206325	0.466002	0.959907	0.461187	0.867758	0.997645	0.832719
hsa-miR-4500	No	No	2.82565	2.14967	2.94741	3.0557	2.87645	3.16077	-0.121141	0.0292786	0.15042	0.619356	0.91782	0.558971	0.916915	0.994481	0.880894
hsa-miR-4500-5p:Novel	No	No	4.48076	4.0005	3.55084	4.77792	4.44746	4.93287	-0.0980897	0.133462	0.231551	0.638174	0.585356	0.295647	0.924808	0.939678	0.716004
hsa-miR-4501	No	No	4.06641	4.1347	4.56888	4.47907	5.33233	5.19433	0.170618	0.191734	0.0211163	0.446519	0.468959	0.928818	0.860381	0.89347	0.995573
hsa-miR-4501-3p:Novel	No	No	2.74397	3.04754	2.14748	3.3698	3.52083	2.85348	0.0537802	-0.267614	-0.321394	0.820197	0.350692	0.215022	0.96284	0.807187	0.650753
hsa-miR-4502	No	No	3.48655	4.4055	5.99793	4.66485	5.13715	5.80656	0.0637254	0.361165	0.297439	0.735975	0.0980441	0.125174	0.939937	0.566981	0.534566
hsa-miR-4502-5p:Novel	No	No	3.03668	3.48036	3.32247	3.70072	3.61379	4.32319	-0.0822002	0.130661	0.212862	0.728078	0.637009	0.395314	0.938306	0.951852	0.791407
hsa-miR-4503	No	No	6.4052	5.70473	6.0057	8.20292	7.20384	7.95299	-0.207111	-0.111537	0.0955741	0.385483	0.692783	0.710342	0.840172	0.962808	0.933335
hsa-miR-4503-3p:Novel	No	No	3.12093	2.19791	3.30724	3.78524	2.80405	3.56262	-0.345112	-0.106768	0.238344	0.151567	0.703324	0.35675	0.629181	0.966559	0.761785
hsa-miR-4504	No	No	2.82565	2.08821	2.36722	2.86682	2.69555	3.43247	-0.115245	0.220157	0.335402	0.658105	0.463685	0.216876	0.927188	0.889746	0.650753
hsa-miR-4504-5p:Novel	No	No	6.77094	5.22054	4.99787	6.67812	6.31455	5.39633	-0.137231	-0.277835	-0.140604	0.491153	0.247378	0.521657	0.877802	0.746393	0.86611
hsa-miR-4505	No	No	3.54887	2.19815	3.57914	3.4196	2.64649	3.49349	-0.353354	-0.0893613	0.263992	0.135863	0.744631	0.297367	0.61301	0.9729	0.716004
hsa-miR-4506	No	No	1.10419	1.30385	0	1.02009	1.7377	0.908567	0.658161	-0.184688	-0.842849	0.0425275	0.654526	0.0174234	NA	0.957069	0.196497
hsa-miR-4506-5p:Novel	No	No	3.65863	3.10273	3.28782	4.42315	3.63313	3.61789	-0.273728	-0.298619	-0.0248907	0.250421	0.292897	0.924079	0.735254	0.773855	0.995573
hsa-miR-4507	No	No	1.41283	1.27599	0.777959	1.62278	1.5101	1.02927	-0.143044	-0.742382	-0.599338	0.650932	0.064493	0.106409	NA	0.505032	0.501572
hsa-miR-4507-5p:Novel	No	No	2.03541	1.7521	1.3137	2.47666	1.84422	1.94112	-0.40569	-0.488266	-0.0825758	0.118035	0.119121	0.778353	0.578329	0.601153	0.957514
hsa-miR-4508	No	No	5.36688	5.65192	4.66506	5.99934	7.08407	6.04496	0.231857	0.0150664	-0.216791	0.289823	0.954259	0.3574	0.769517	0.997645	0.762397
hsa-miR-4508-3p:Novel	No	No	0.766557	0.899229	0	1.24599	2.12431	0.610644	0.616283	-0.946383	-1.56267	0.227035	0.147414	0.00800124	NA	0.640049	0.128789
hsa-miR-4509	No	No	5.68751	5.70473	5.44571	7.45912	6.36153	7.00586	-0.246657	-0.041528	0.205129	0.175509	0.84596	0.294382	0.663592	0.982423	0.715541
hsa-miR-450a-1-3p	No	No	1.72243	1.59592	1.55592	2.08596	1.73681	1.56031	-0.208254	-0.256822	-0.0485679	0.45362	0.442444	0.874296	0.860865	0.87835	0.989309
hsa-miR-450a-2-3p	No	No	1.11135	1.09336	0.777959	1.54444	1.33633	1.00422	-0.211956	-0.542012	-0.330056	0.519869	0.184485	0.381888	NA	0.683343	0.784842
hsa-miR-450a-5p	No	No	9.81406	9.10475	7.83789	18.19	15.1256	9.59825	-0.241378	-0.950979	-0.709601	0.418742	0.00820423	0.0304411	0.845168	0.194584	0.265596
hsa-miR-450b-3p	No	No	1.11135	0.523862	1.14222	1.30518	1.03578	1.18185	-0.373075	0.0234326	0.396507	0.360342	0.960943	0.368633	NA	0.997645	0.773573
hsa-miR-450b-5p	No	No	2.13507	1.55381	1.97799	6.11204	2.7002	2.9851	-1.12189	-1.03238	0.089513	0.00852104	0.0429608	0.84996	0.17769	0.444658	0.981114
hsa-miR-4510	No	No	3.54223	3.14519	2.96699	3.40626	3.76318	2.97327	0.152992	-0.306046	-0.459038	0.494884	0.267408	0.0645216	0.877802	0.75983	0.389505
hsa-miR-4510-3p:Novel	No	No	10.5193	10.1164	10.1135	11.4197	11.1935	10.5586	-0.0298394	-0.104887	-0.0750478	0.855279	0.590613	0.671279	0.970631	0.941911	0.925021
hsa-miR-4511	No	No	11.8596	9.10475	9.88996	14.5279	13.2289	12.2792	-0.182222	-0.165772	0.0164504	0.43503	0.551679	0.948236	0.853754	0.924399	0.997578
hsa-miR-4511-3p:Novel	No	No	5.90371	5.65192	4.34693	6.3298	7.21439	7.35028	0.213212	0.299579	0.0863676	0.398902	0.317148	0.747936	0.844676	0.790135	0.946254
hsa-miR-4512	No	No	2.95564	3.28009	3.74841	4.23827	5.05038	4.13919	0.270199	-0.0951857	-0.365385	0.345037	0.782189	0.237846	0.815768	0.976894	0.671838
hsa-miR-4512-5p:Novel	No	No	5.14571	4.92666	4.77261	5.45143	5.59968	4.53339	0.0473423	-0.191799	-0.239141	0.78689	0.367991	0.213362	0.954992	0.821316	0.650148
hsa-miR-4513	No	No	4.55001	3.57748	2.78454	6.31311	6.03644	4.56597	-0.0782433	-0.535852	-0.457608	0.804963	0.16157	0.189539	0.958822	0.659228	0.623801
hsa-miR-4513-3p:Novel	No	No	2.13507	3.5042	2.36722	3.0758	6.41447	4.83486	1.04654	0.687482	-0.359055	0.00154613	0.0791861	0.29444	0.062273	0.529271	0.715541
hsa-miR-4514	No	No	3.54223	3.10762	3.56608	3.0165	3.6816	4.0259	0.188349	0.497569	0.30922	0.42575	0.0681694	0.197813	0.848571	0.509346	0.633322
hsa-miR-4514-3p:Novel	No	No	0.985213	1.01164	0	1.09881	1.31774	0.672192	0.0997765	-0.726575	-0.826351	0.796203	0.147751	0.0706028	NA	0.640253	0.413888
hsa-miR-4515	No	No	3.38547	3.10762	2.7272	3.60663	3.45138	3.05313	-0.0412913	-0.189041	-0.14775	0.839863	0.44596	0.510576	0.967605	0.878572	0.860319
hsa-miR-4515-3p:Novel	No	No	6.7847	9.63519	6.56851	7.70243	11.066	8.9108	0.523872	0.165286	-0.358585	0.0296531	0.564531	0.162118	0.327053	0.932191	0.593327
hsa-miR-4516	No	No	10.1771	12.0488	12.2243	12.8253	14.0363	11.7235	0.120891	-0.156644	-0.277534	0.5449	0.512729	0.19987	0.896518	0.913017	0.634114
hsa-miR-4516-3p:Novel	No	No	8.43213	10.2927	9.68343	18.396	16.5322	11.8953	-0.127872	-0.663246	-0.535374	0.678551	0.0728478	0.111246	0.929203	0.514295	0.508247
hsa-miR-4517	No	No	5.16729	4.06641	3.9411	4.85436	4.2496	3.94798	-0.193786	-0.156698	0.0370881	0.295369	0.481118	0.855418	0.773071	0.901209	0.981846
hsa-miR-4517-3p:Novel	No	No	3.12093	2.45827	2.459	3.40876	3.73941	5.5681	0.13488	0.716746	0.581866	0.677807	0.0563226	0.0833558	0.929203	0.489451	0.44556
hsa-miR-4518	No	No	5.91128	6.06983	4.17681	7.75904	18.0136	7.94666	1.14583	0.186776	-0.959056	0.00169219	0.669729	0.0145997	0.0628256	0.961432	0.176413
hsa-miR-4518-5p:Novel	No	No	7.72934	6.55539	9.3355	9.17119	7.89791	10.6232	-0.296029	0.291948	0.587977	0.150301	0.224756	0.00734529	0.629181	0.725462	0.119606
hsa-miR-4519	No	No	3.41251	4.09712	4.09081	4.02329	4.78319	4.61918	0.29731	0.273527	-0.0237824	0.226549	0.348203	0.926821	0.721234	0.806732	0.995573
hsa-miR-4519-3p:Novel	No	No	0.828465	0.501486	0	0.844167	0.764458	0.299557	-0.193923	-1.1482	-0.954278	0.623783	0.0253663	0.0449794	NA	NA	NA
hsa-miR-451a	No	No	2.24784	1.81958	1.42643	14.8661	9.48618	7.53668	-0.612857	-1.10748	-0.494622	0.286057	0.10637	0.427811	0.763206	0.578613	0.816219
hsa-miR-451a-3p:Novel	No	No	0.735102	1.02513	0.666437	1.18788	1.12754	1.07359	-0.072869	-0.093777	-0.020908	0.84886	0.836293	0.959458	NA	0.979381	0.997578
hsa-miR-451b	No	No	2.90458	3.03619	1.77934	15.7821	8.62732	7.84824	-0.864181	-1.00742	-0.143239	0.0896738	0.0972249	0.79578	0.526415	0.565954	0.964688
hsa-miR-451b-3p:Novel	No	No	1.10419	0.609508	0	1.53684	1.25312	1.24066	-0.185666	-0.386736	-0.20107	0.707331	0.513812	0.710499	NA	0.913858	0.933335
hsa-miR-452-3p	No	No	1.07338	1.21902	0.922105	1.24135	1.42598	0.973301	0.137145	-0.130949	-0.268094	0.674944	0.744056	0.45316	NA	0.9729	0.828031
hsa-miR-452-5p	No	No	7.47273	7.27833	7.77959	8.34327	8.61486	9.6387	0.108418	0.0759315	-0.0324862	0.585939	0.746018	0.877713	0.904849	0.9729	0.990987
hsa-miR-4520-2-3p	No	No	2.36148	1.37595	2.21498	2.19513	1.87675	2.51554	-0.226051	0.121249	0.347299	0.369107	0.676507	0.189356	0.828678	0.962434	0.623801
hsa-miR-4520-3p	No	No	1.35694	1.37889	0.988996	1.72594	1.65721	1.36144	-0.0512656	-0.228099	-0.176833	0.860247	0.519977	0.5822	0.971729	0.916942	0.887287
hsa-miR-4520-5p	No	No	6.08912	4.5433	4.91234	6.27105	5.89793	5.79407	-0.140813	0.0489749	0.189788	0.452368	0.824372	0.344004	0.860865	0.977782	0.752014
hsa-miR-4521	No	No	4.92607	4.71476	4.07477	6.10137	7.18921	7.05837	0.236011	0.297188	0.0611771	0.447247	0.419822	0.853636	0.860381	0.862851	0.981448
hsa-miR-4521-3p:Novel	No	No	4.72297	4.04655	3.99862	11.6047	11.6113	4.97574	0.119055	-0.962279	-1.08133	0.765631	0.0468759	0.0139964	0.949742	0.452722	0.173248
hsa-miR-4522	No	No	3.03668	2.39798	3.16158	3.5092	2.81746	3.17986	-0.336876	-0.339512	-0.0026367	0.161834	0.235943	0.992071	0.642311	0.737323	0.998791
hsa-miR-4522-5p:Novel	No	No	3.9842	4.49642	3.32247	4.14296	5.02495	3.90799	0.305841	-0.140992	-0.446832	0.144211	0.57975	0.0485971	0.629181	0.93949	0.335551
hsa-miR-4523	No	No	3.83279	3.59692	3.22781	3.57935	5.25895	3.73593	0.446009	-0.0309242	-0.476933	0.0842225	0.921201	0.0859855	0.504569	0.994481	0.447565
hsa-miR-4523-3p:Novel	No	No	1.82932	1.88397	1.39227	2.99848	2.9776	2.08075	-0.0691548	-0.525993	-0.456839	0.825208	0.171383	0.193751	0.963352	0.670272	0.625634
hsa-miR-4524a-3p	No	No	1.69274	1.07483	1.96494	2.06529	1.45099	1.87778	-0.498259	-0.127454	0.370805	0.0930968	0.706959	0.242624	0.534647	0.966559	0.677374
hsa-miR-4524a-5p	No	No	6.77094	7.45322	7.90396	10.5541	14.3852	14.4308	0.386847	0.526742	0.139896	0.25055	0.18726	0.697684	0.735254	0.685997	0.932184
hsa-miR-4524b-3p	No	No	1.39919	1.3982	2.03738	2.50551	2.05848	2.20473	-0.387412	-0.21243	0.174982	0.253428	0.597011	0.636718	0.735254	0.943798	0.911432
hsa-miR-4524b-5p	No	No	1.4702	1.2422	1.99931	2.00074	1.64538	2.14293	-0.210441	0.355236	0.565677	0.47001	0.276433	0.0555985	0.869704	0.76656	0.363875
hsa-miR-4525	No	No	4.41676	3.10762	2.95903	5.50491	3.339	4.95298	-0.721699	-0.114579	0.607119	0.0128827	0.735226	0.0537753	0.216116	0.970182	0.358306
hsa-miR-4525-3p:Novel	No	No	1.72243	1.3982	1.58079	1.79778	1.99091	1.94017	0.0728014	-0.0541017	-0.126903	0.809965	0.880266	0.693734	0.961627	0.987512	0.930077
hsa-miR-4526	No	No	1.1375	1.62656	1.14222	1.34897	1.87463	1.54696	0.574978	0.37878	-0.196198	0.0793953	0.32662	0.550603	0.497915	0.793452	0.880141
hsa-miR-4526-5p:Novel	No	No	2.82565	3.25313	3.66203	3.01716	4.68241	4.12154	0.548209	0.451561	-0.0966477	0.0430936	0.157417	0.729395	0.398578	0.655362	0.940705
hsa-miR-4527	No	No	10.2914	10.1164	12.7721	13.6322	21.4815	14.6161	0.656551	0.0235779	-0.632973	0.0156107	0.942053	0.0302464	0.238692	0.997645	0.264656
hsa-miR-4527-3p:Novel	No	No	3.33405	4.25579	4.14264	4.42476	6.73633	5.51921	0.587916	0.480672	-0.107244	0.0497974	0.179141	0.735408	0.427576	0.679422	0.941285
hsa-miR-4528	No	No	3.44486	3.18899	3.32247	3.93708	4.36808	3.95848	0.117918	0.0278209	-0.0900968	0.641954	0.9272	0.742048	0.924876	0.994681	0.944494
hsa-miR-4528-5p:Novel	No	No	3.2026	2.46333	2.0454	3.14794	3.45158	3.02014	0.0258617	-0.0184865	-0.0443482	0.927489	0.956651	0.885211	0.982695	0.997645	0.990987
hsa-miR-4529-3p	No	No	1.32807	1.55137	2.0454	3.14198	1.85088	2.2044	-0.74461	-0.500047	0.244563	0.0237894	0.199795	0.504954	0.294612	0.699064	0.858028
hsa-miR-4529-5p	No	No	1.32807	1.27599	1.38593	1.78927	1.62901	1.96649	-0.254825	0.104726	0.359552	0.409849	0.76783	0.267506	0.845168	0.976522	0.695854
hsa-miR-4530	No	No	1.39919	1.55381	1.18361	1.97535	1.9565	1.94711	0.0303197	-0.156462	-0.186782	0.926043	0.689518	0.597752	0.982695	0.962808	0.894425
hsa-miR-4530-5p:Novel	No	No	1.97157	2.00025	1.4737	2.37112	2.31762	1.68504	-0.115386	-0.486684	-0.371299	0.679982	0.163463	0.246517	0.929203	0.663239	0.68181
hsa-miR-4531	No	No	1.4702	1.09896	1.38593	1.4882	1.31865	1.88984	-0.180533	0.218327	0.39886	0.572516	0.550331	0.228127	NA	0.924399	0.661455
hsa-miR-4531-5p:Novel	No	No	2.75227	2.69769	2.459	3.01766	3.57	3.15387	0.21244	0.0626737	-0.149767	0.340757	0.815033	0.527592	0.815768	0.977782	0.869855
hsa-miR-4533	No	No	7.35102	6.99214	5.31292	9.08604	9.5132	8.46337	0.115993	-0.239062	-0.355055	0.641628	0.423146	0.188989	0.924876	0.864377	0.623801
hsa-miR-4533-3p:Novel	No	No	1.51834	2.7964	2.96699	1.78617	3.10807	3.65539	0.699697	0.977141	0.277445	0.0077378	0.000958756	0.255687	0.169551	0.0502574	0.685961
hsa-miR-4534	No	No	1.27947	1.06395	0.777959	1.58304	3.19199	1.3002	0.900376	-0.30668	-1.20706	0.0501049	0.592126	0.0176611	0.428406	0.942414	0.197296
hsa-miR-4534-5p:Novel	No	No	3.9842	3.53179	2.96699	4.34172	3.88895	3.58933	-0.128931	-0.262169	-0.133238	0.560641	0.327575	0.585979	0.897021	0.794491	0.890372
hsa-miR-4535	No	No	2.78924	2.46636	2.41496	4.11472	3.50634	3.2807	-0.351635	-0.453083	-0.101448	0.219073	0.187157	0.748674	0.706825	0.685997	0.946254
hsa-miR-4535-5p:Novel	No	No	5.50454	5.18639	5.99793	5.80283	7.20622	6.10828	0.278977	0.0540468	-0.22493	0.161787	0.820977	0.290921	0.642311	0.977782	0.71244
hsa-miR-4536-3p	No	No	2.79838	2.5932	2.21498	3.31283	3.24463	2.43715	-0.0276452	-0.346238	-0.318592	0.923743	0.325442	0.32022	0.982695	0.793452	0.729296
hsa-miR-4536-5p	No	No	4.19756	3.65705	3.55867	4.84418	4.42537	4.06253	-0.102554	-0.275024	-0.17247	0.667723	0.337877	0.509843	0.928477	0.805047	0.860095
hsa-miR-4537	No	No	5.31227	4.09945	2.89795	5.99407	6.96537	4.42388	0.243477	-0.460049	-0.703526	0.413521	0.203644	0.0317657	0.845168	0.702831	0.27247
hsa-miR-4537-3p:Novel	No	No	2.275	1.79846	2.13965	2.17774	2.45591	2.46378	0.211697	0.190074	-0.0216233	0.450172	0.56657	0.941233	0.860865	0.932191	0.996608
hsa-miR-4538	No	No	7.47273	7.75683	6.96134	8.28816	8.68419	7.91547	0.0336615	-0.0352968	-0.0689583	0.840583	0.859947	0.70249	0.967955	0.982423	0.933113
hsa-miR-4538-3p:Novel	No	No	2.24784	2.43803	3.43864	3.02631	3.34967	4.36319	0.092127	0.392063	0.299936	0.714003	0.175435	0.244121	0.935784	0.673954	0.678476
hsa-miR-4539	No	No	2.56043	1.59592	1.97799	2.62346	2.06291	2.07955	-0.32907	-0.115334	0.213736	0.194393	0.700701	0.440513	0.680987	0.966159	0.819904
hsa-miR-4539-5p:Novel	No	No	8.47695	5.71816	6.56851	8.8653	11.0987	11.379	0.287469	0.332056	0.0445872	0.362578	0.376013	0.895095	0.824059	0.825209	0.991836
hsa-miR-454-3p	No	No	3.44486	2.61931	2.6274	6.62317	3.54113	4.6763	-0.898379	-0.532195	0.366184	0.010263	0.199318	0.340204	0.186575	0.698797	0.750123
hsa-miR-454-5p	No	No	2.03541	1.78874	1.44898	2.19658	2.26756	1.71139	0.0146158	-0.310376	-0.324992	0.956608	0.347662	0.277741	0.990076	0.806497	0.702384
hsa-miR-4540	No	No	1.07338	1.00012	0	1.48011	1.68499	2.72019	0.20754	1.01898	0.811437	0.66524	0.0654581	0.0987502	0.927188	0.505032	0.488932
hsa-miR-4540-5p:Novel	No	No	2.65614	2.35453	2.94741	3.12997	3.11955	2.82542	0.00334379	-0.108574	-0.111918	0.989625	0.72354	0.686672	0.996572	0.967889	0.927692
hsa-miR-455-3p	No	No	0	0	0.869901	0.780587	1.41006	1.27627	0.683685	0.68729	0.00360511	0.213476	0.282286	0.994841	NA	0.77095	0.998851
hsa-miR-455-5p	No	No	3.53179	3.76115	3.9411	4.46307	4.63749	4.30472	0.119983	-0.0347914	-0.154775	0.601395	0.899333	0.531208	0.911614	0.991871	0.870575
hsa-miR-4632-3p	No	No	2.03541	0	0	2.10104	1.01344	0.890658	-1.03243	-1.02633	0.0060972	0.00340024	0.018189	0.988506	NA	0.302648	0.99842
hsa-miR-4633-3p	No	No	1.12392	1.78874	1.55592	1.9404	2.42389	2.34524	0.235852	0.332974	0.0971227	0.525079	0.449688	0.804697	0.890674	0.880567	0.97047
hsa-miR-4633-5p	No	No	1.24837	2.00025	1.96494	1.7602	2.22564	1.94491	0.233706	0.10409	-0.129616	0.441081	0.773545	0.686059	0.858707	0.976522	0.927692
hsa-miR-4634	No	No	13.2503	12.1902	9.88996	13.3378	16.8871	10.8703	0.303141	-0.428791	-0.731932	0.208291	0.139935	0.00537129	0.692413	0.637962	0.0991248
hsa-miR-4634-3p:Novel	No	No	1.16183	1.00012	0.777959	1.60394	1.85543	1.18554	0.197051	-0.640296	-0.837347	0.618407	0.195037	0.0618032	0.916871	0.69454	0.377136
hsa-miR-4635	No	No	6.5719	7.00087	4.99787	8.0847	9.56806	6.14692	0.20773	-0.430528	-0.638258	0.416648	0.165588	0.0232309	0.845168	0.665408	0.229669
hsa-miR-4635-5p:Novel	No	Yes	8.71373	8.26811	6.85332	9.36201	16.7646	7.24766	0.825418	-0.382998	-1.20842	0.00582287	0.291205	0.00021655	0.140817	0.773855	0.011989
hsa-miR-4637	No	No	2.14675	2.20275	2.13965	2.69648	2.43074	2.51908	-0.188386	0.0615486	0.249935	0.423298	0.821746	0.314381	0.848314	0.977782	0.722522
hsa-miR-4637-5p:Novel	No	No	3.22013	2.05027	2.86331	3.39283	2.53421	2.94743	-0.428102	-0.165147	0.262955	0.0604998	0.534713	0.288468	0.471699	0.9204	0.712374
hsa-miR-4638-3p	No	No	4.07082	3.57748	3.9411	5.55879	7.69849	4.08952	0.316177	-0.342175	-0.658352	0.315693	0.373363	0.0578896	0.791305	0.823186	0.369183
hsa-miR-4639-3p	No	No	0	0.973565	0.461977	1.05903	1.11975	0.95749	0.0518113	-0.521255	-0.573067	0.898387	0.297034	0.206703	NA	0.773855	0.638997
hsa-miR-4639-5p	No	No	2.4854	1.5181	1.77542	2.83585	2.15975	2.42821	-0.487721	-0.155458	0.332263	0.113765	0.667998	0.323331	0.570179	0.961432	0.730296
hsa-miR-4640-3p	No	No	0	0	0	0.640377	0.929808	0.732369	0.597778	0.533987	-0.0637913	0.211105	0.341078	0.894371	NA	0.806301	NA
hsa-miR-4640-5p	No	No	0	0.909792	0.491234	0.55044	0.883181	0.900382	0.568831	0.493107	-0.0757242	0.176854	0.310755	0.852888	NA	0.784134	NA
hsa-miR-4641	No	No	0.697309	0.642346	0.922105	1.1954	0.857391	0.924397	-0.623729	-0.561487	0.0622422	0.0936107	0.215058	0.88499	NA	0.716861	NA
hsa-miR-4641-5p:Novel	No	No	2.14675	2.5932	2.44135	2.82228	2.91701	3.39604	0.0415121	0.251059	0.209546	0.868998	0.390536	0.422434	0.976253	0.84372	0.815388
hsa-miR-4642	No	No	4.41061	3.74581	3.55084	4.60249	4.5523	4.05668	0.00813983	-0.242718	-0.250857	0.970105	0.353978	0.290689	0.992486	0.809591	0.71244
hsa-miR-4642-3p:Novel	No	No	1.77444	2.43803	2.21498	2.56966	2.69443	2.90554	0.018732	0.311687	0.292955	0.941844	0.296877	0.272157	0.985589	0.773855	0.698737
hsa-miR-4643	No	No	1.69274	1.82834	2.20483	2.40321	1.87388	2.37734	-0.30952	0.0283091	0.337829	0.246455	0.927129	0.235132	0.735254	0.994681	0.667888
hsa-miR-4643-5p:Novel	No	No	2.49675	1.87735	1.77542	3.24436	2.75327	2.61554	-0.272133	-0.142599	0.129533	0.354793	0.683338	0.686223	0.818146	0.962808	0.927692
hsa-miR-4644	No	No	5.59675	5.57918	5.7111	6.09339	6.40705	5.82143	0.0466358	0.0351522	-0.0114835	0.800349	0.872992	0.953701	0.956828	0.983309	0.997578
hsa-miR-4644-5p:Novel	No	No	7.6813	6.64067	6.22367	8.10417	7.13319	7.0729	-0.199787	-0.278999	-0.079212	0.198125	0.136072	0.644677	0.682284	0.631764	0.91517
hsa-miR-4645-3p	No	No	2.13507	2.12599	1.84421	2.71613	2.5875	2.36821	-0.112995	-0.353137	-0.240143	0.677572	0.28279	0.424304	0.929203	0.771677	0.815389
hsa-miR-4645-5p	No	No	0	0	0.461052	0.553573	0.498426	0.672572	-0.354349	0.0278275	0.382177	0.46611	0.960711	0.456275	NA	NA	NA
hsa-miR-4646-3p	No	No	0.640108	0.649043	0	0.653066	0.805906	0.499657	0.177159	-0.515331	-0.69249	0.660306	0.311942	0.127696	NA	NA	NA
hsa-miR-4646-5p	No	No	1.21782	1.18074	1.55592	1.53759	3.13743	1.46907	1.01456	-0.0346221	-1.04919	0.0168575	0.947233	0.0224155	0.250094	0.997645	0.225082
hsa-miR-4647	No	No	5.36688	5.59528	6.38605	5.44604	6.48791	6.98609	0.202779	0.309634	0.106856	0.239465	0.123158	0.546353	0.733987	0.610241	0.880002
hsa-miR-4647-3p:Novel	No	No	1.92033	2.35453	2.459	2.03752	2.67784	2.7009	0.269797	0.341685	0.0718873	0.284342	0.24492	0.778373	0.761397	0.743719	0.957514
hsa-miR-4648	No	No	2.75227	3.79902	2.94741	3.52092	4.05198	3.63517	0.237605	-0.00593117	-0.243536	0.261028	0.981195	0.274448	0.745023	0.998523	0.70024
hsa-miR-4648-3p:Novel	No	No	2.42754	2.33071	2.28444	3.31378	3.09067	2.82895	-0.104846	-0.29759	-0.192744	0.714522	0.387997	0.540004	0.935784	0.84122	0.873705
hsa-miR-4649-3p	No	No	1.35694	1.50446	1.33287	2.63065	1.65181	1.54151	-0.774362	-0.764771	0.00959074	0.02665	0.0727181	0.980987	0.309915	0.514295	0.998364
hsa-miR-4649-5p	No	No	1.39919	1.063	1.38593	1.47438	1.42356	1.62112	-0.113775	0.0304865	0.144262	0.716174	0.933424	0.661754	NA	0.995339	0.922712
hsa-miR-4650-3p	No	No	2.13507	2.04972	2.21498	2.36862	2.8418	2.37827	0.307756	-0.000694533	-0.30845	0.244626	0.998254	0.271116	0.734725	0.999681	0.697255
hsa-miR-4650-5p	No	No	4.49568	3.66704	4.40966	6.85395	4.0718	4.03129	-0.679388	-0.840966	-0.161578	0.00555525	0.00444791	0.559184	0.138148	0.126805	0.880894
hsa-miR-4651	No	No	3.33405	3.57748	3.22781	3.97877	4.80602	3.17467	0.269035	-0.348347	-0.617382	0.305951	0.279359	0.0332855	0.786811	0.769846	0.279984
hsa-miR-4651-3p:Novel	No	No	1.28022	1.5181	1.42643	1.74496	1.91321	2.03013	0.0990771	0.412543	0.313466	0.725547	0.200489	0.267689	0.937143	0.700597	0.695854
hsa-miR-4652-3p	No	No	1.12392	0.599494	0.777959	1.339	1.84829	2.22757	0.319747	0.82609	0.506343	0.539119	0.168096	0.342338	0.896518	0.665408	0.752014
hsa-miR-4652-5p	No	No	1.28022	1.37802	1.10241	1.44412	1.69145	1.13024	0.229883	-0.232851	-0.462735	0.452918	0.537771	0.168824	NA	0.9204	0.602424
hsa-miR-4653-3p	No	No	3.33405	3.2245	3.74841	3.41119	4.5154	4.02341	0.365145	0.2966	-0.0685453	0.130307	0.300068	0.785812	0.600507	0.773855	0.959831
hsa-miR-4653-5p	No	No	0	1.06395	0.715827	0.614798	1.30934	0.897245	0.910026	0.58175	-0.328276	0.0156961	0.197995	0.374727	NA	0.69641	0.780367
hsa-miR-4654-3p:Novel	No	Yes	2.74397	3.5042	3.28782	2.88472	3.73987	5.85095	0.250766	1.09803	0.847265	0.377141	0.000678219	0.00285654	0.830884	0.0408187	0.0649118
hsa-miR-4655-3p	No	No	0.67847	1.063	0	1.09128	1.32901	0.928728	0.242846	0.0313968	-0.211449	0.474627	0.939304	0.559846	NA	0.997645	0.881265
hsa-miR-4655-5p	No	No	2.03541	2.43984	1.84791	2.63382	3.3254	2.11596	0.275021	-0.213136	-0.488158	0.316376	0.527718	0.105804	0.791305	0.917647	0.500267
hsa-miR-4656	No	No	2.58364	2.78959	2.14748	2.74751	4.19468	3.04636	0.588207	0.0798356	-0.508372	0.028521	0.806063	0.0747903	0.322517	0.977782	0.42409
hsa-miR-4656-3p:Novel	No	No	1.4702	2.06735	1.4737	1.62445	2.81414	2.00895	0.685442	0.341885	-0.343557	0.0193047	0.331135	0.252411	0.266425	0.797769	0.685608
hsa-miR-4657	No	No	1.97043	2.25669	2.78454	2.60917	2.8041	3.01537	0.110846	0.240845	0.129998	0.65853	0.40733	0.614413	0.927188	0.855822	0.901199
hsa-miR-4657-3p:Novel	No	No	2.36148	1.8475	2.33388	2.8339	2.29462	2.31832	-0.232311	-0.133832	0.0984789	0.349374	0.649634	0.715507	0.815768	0.956521	0.935118
hsa-miR-4658	No	No	2.75227	1.87735	2.15441	3.02118	2.37421	2.30007	-0.303312	-0.341999	-0.0386865	0.233193	0.264033	0.891378	0.727452	0.757417	0.990987
hsa-miR-4658-5p:Novel	No	No	7.09774	6.16591	7.00163	7.47507	6.94836	7.81963	-0.111686	0.0386634	0.150349	0.522294	0.85023	0.418481	0.890674	0.982423	0.812676
hsa-miR-4659a-3p	No	No	1.35694	1.09896	0.982468	1.72891	1.18998	1.40596	-0.445638	-0.112193	0.333445	0.142143	0.752184	0.31419	NA	0.973596	0.722522
hsa-miR-4659b-3p	No	No	0	0.324522	0	0.610936	1.16814	0.619356	0.977981	-0.149829	-1.12781	0.0515045	0.806969	0.0337633	NA	0.977782	NA
hsa-miR-4659b-5p	No	No	2.2227	1.89733	1.84791	2.95438	2.37662	2.08028	-0.245231	-0.228114	0.0171169	0.417203	0.532746	0.959334	0.845168	0.9204	0.997578
hsa-miR-466	No	No	2.36148	1.39871	2.86331	2.60091	2.0677	2.85573	-0.389322	-0.010188	0.379134	0.147545	0.973685	0.184376	0.629181	0.997752	0.617629
hsa-miR-466-5p:Novel	No	No	3.41251	3.74581	4.09081	3.85388	4.43229	4.30689	0.187218	0.171014	-0.0162041	0.429898	0.541883	0.948316	0.849639	0.9204	0.997578
hsa-miR-4660	No	No	7.51363	6.96072	7.39163	7.95779	7.68932	8.00242	-0.0815274	0.0380942	0.119622	0.614201	0.841716	0.48878	0.916871	0.980672	0.84709
hsa-miR-4660-3p:Novel	No	No	1.53311	1.59021	1.99931	1.9811	1.83076	2.08175	-0.155287	0.0664969	0.221784	0.586905	0.840402	0.459196	0.905567	0.980325	0.832719
hsa-miR-4661-3p	No	No	0	0	1.09594	0.797782	0.541269	1.02156	-0.323215	0.366946	0.690161	0.434572	0.422194	0.0961559	NA	NA	NA
hsa-miR-4661-5p	No	No	3.41251	3.03619	2.7272	4.70692	3.91467	3.45381	-0.330972	-0.482115	-0.151143	0.239101	0.156815	0.629687	0.733987	0.655362	0.90915
hsa-miR-4662a-3p	No	No	1.74275	1.59865	1.55592	2.17781	1.57769	1.48379	-0.351679	-0.233426	0.118253	0.163917	0.450187	0.68031	0.644902	0.880567	0.925021
hsa-miR-4662a-5p	No	No	1.39462	1.2422	1.14222	1.72677	1.58897	1.30219	-0.159524	-0.178003	-0.0184788	0.601403	0.629033	0.956206	0.911614	0.9503	0.997578
hsa-miR-4662b	No	No	1.97043	1.88397	2.0454	2.41362	2.09113	2.44541	-0.259092	0.134468	0.393561	0.343363	0.672437	0.175707	0.815768	0.961432	0.607986
hsa-miR-4662b-5p:Novel	No	No	2.55895	1.87735	2.03738	2.87299	2.15077	2.08014	-0.359186	-0.310586	0.0485997	0.138076	0.289579	0.858478	0.616894	0.773855	0.981983
hsa-miR-4663	No	No	4.27013	4.25579	4.17681	3.97248	4.39663	4.53353	0.108415	0.106913	-0.00150113	0.585896	0.647307	0.994242	0.904849	0.956521	0.998851
hsa-miR-4663-3p:Novel	No	No	2.2227	2.60771	2.36722	3.31422	3.77906	2.77686	0.0532618	-0.331052	-0.384314	0.855061	0.350278	0.232032	0.970631	0.806807	0.665045
hsa-miR-4664-3p	No	No	6.13246	5.23862	5.53263	6.93587	6.39419	7.24263	-0.124803	-0.016717	0.108086	0.54596	0.945431	0.62647	0.896518	0.997645	0.908381
hsa-miR-4664-5p	No	No	0	0.642346	1.10749	0.490613	0.725351	1.17275	0.6165	1.07495	0.458453	0.15455	0.0232686	0.233284	NA	0.337105	NA
hsa-miR-4665-3p	No	No	0.640108	0.199831	0.461052	1.00782	0.833597	0.766065	-0.20928	-0.246675	-0.037395	0.595716	0.60402	0.931557	NA	0.944254	NA
hsa-miR-4665-5p	No	No	1.10419	0.501486	0.715827	1.44336	0.871152	1.08555	-0.725221	-0.375638	0.349583	0.0476349	0.378536	0.390925	NA	0.827888	0.787801
hsa-miR-4666a-3p	No	No	2.58364	2.12789	1.84421	3.28819	2.60365	2.90371	-0.31987	-0.249563	0.0703069	0.22042	0.422775	0.806651	0.708569	0.864377	0.970697
hsa-miR-4666a-5p	No	No	1.69274	1.5181	1.77934	2.24674	1.86581	1.99327	-0.316109	-0.0253607	0.290748	0.271889	0.940023	0.348635	0.753744	0.997645	0.755675
hsa-miR-4666b	No	No	4.41474	3.88979	3.30724	4.66881	5.10373	3.74744	0.0634707	-0.467605	-0.531076	0.757297	0.0659723	0.021534	0.946083	0.505032	0.220037
hsa-miR-4666b-3p:Novel	No	No	3.65347	3.53179	4.74238	4.71762	4.10868	4.70871	-0.158538	-0.0527422	0.105795	0.449759	0.830912	0.638312	0.860865	0.979381	0.911432
hsa-miR-4667-3p	No	No	0	0	0	0.735599	0.531351	0.659498	-0.542264	-0.358941	0.183323	0.218651	0.489344	0.705051	NA	NA	NA
hsa-miR-4667-5p	No	No	1.51834	1.25808	1.09594	1.49423	1.37313	1.48218	-0.160371	-0.0485664	0.111805	0.593748	0.891296	0.729221	NA	0.991492	0.940705
hsa-miR-4668-3p	No	No	0	0	0.666437	0.642585	1.1853	0.848458	0.722233	0.314865	-0.407368	0.154643	0.606293	0.441665	NA	0.944254	NA
hsa-miR-4668-5p	No	No	3.33405	4.10053	4.30883	5.54697	6.31471	5.15244	0.153156	-0.0548819	-0.208038	0.62335	0.883264	0.537853	0.920017	0.988502	0.873023
hsa-miR-4669	No	No	1.35694	1.06395	1.10241	1.52493	1.28304	1.35246	-0.204679	-0.256637	-0.0519576	0.480932	0.459258	0.870126	NA	0.888311	0.987381
hsa-miR-4669-5p:Novel	No	No	2.2227	1.62656	2.03738	2.49636	1.99141	2.49098	-0.426036	0.0465144	0.47255	0.0879178	0.870208	0.0737726	0.52079	0.983309	0.421283
hsa-miR-4670-5p	No	No	3.06623	3.03619	2.44135	3.73462	3.46335	3.02008	0.0625947	-0.222923	-0.285518	0.793766	0.44455	0.278512	0.956828	0.87835	0.702384
hsa-miR-4671-3p	No	No	1.21782	0.699353	0.988996	1.4308	1.16469	1.12873	-0.457554	-0.294613	0.162941	0.179387	0.46406	0.665148	NA	0.88979	0.922712
hsa-miR-4671-5p	No	No	7.96251	5.54249	7.37701	9.17099	6.17399	8.44843	-0.5315	-0.108302	0.423197	0.00377413	0.612033	0.0326715	0.11054	0.945958	0.277106
hsa-miR-4672	No	No	1.72243	1.37889	1.22068	1.87888	1.66052	1.49777	-0.257751	-0.406127	-0.148376	0.368798	0.246023	0.646759	0.828678	0.744276	0.916417
hsa-miR-4672-5p:Novel	No	No	4.30607	3.14519	2.96699	4.2219	3.44331	3.40003	-0.320448	-0.280626	0.0398227	0.116876	0.248896	0.859655	0.573714	0.746393	0.982233
hsa-miR-4673	No	No	2.94041	2.69769	2.6274	3.36161	2.8815	2.93884	-0.10137	-0.15909	-0.0577195	0.657328	0.560613	0.816405	0.927188	0.929432	0.971096
hsa-miR-4673-3p:Novel	No	No	0	0	0	0.669779	1.02658	0.484931	0.354519	-0.482906	-0.837425	0.494642	0.451666	0.144225	NA	0.880572	NA
hsa-miR-4674	No	Yes	3.83842	3.10273	3.11183	5.96247	12.4205	3.81596	0.983898	-0.590584	-1.57448	0.020834	0.255092	0.0007644	0.274593	0.749591	0.0280433
hsa-miR-4674-5p:Novel	No	No	4.11596	3.76795	4.66506	9.43599	15.4461	6.18635	0.710457	-0.483759	-1.19422	0.081294	0.325947	0.00727548	0.501393	0.793452	0.119107
hsa-miR-4675	No	No	3.06623	2.50743	2.6097	3.01952	3.17405	3.37125	-0.0106027	0.168979	0.179582	0.962716	0.524397	0.45037	0.991297	0.916964	0.82613
hsa-miR-4675-5p:Novel	No	No	2.95564	2.75817	2.36722	3.32978	3.33467	4.4214	0.0373391	0.398254	0.360915	0.901541	0.257543	0.253717	0.977967	0.754748	0.685608
hsa-miR-4676-3p	No	No	0.828465	1.2422	1.14222	1.39354	1.47048	1.33476	0.022681	-0.189329	-0.21201	0.941619	0.610446	0.526166	NA	0.94544	0.869544
hsa-miR-4676-5p	No	No	1.32807	1.23167	1.3137	1.72715	2.52137	1.71846	0.472618	0.0224629	-0.450155	0.207825	0.960534	0.263025	0.692413	0.997645	0.692774
hsa-miR-4677-3p	No	No	2.65614	2.65987	2.33388	2.89836	3.26075	3.28904	0.145241	0.309159	0.163918	0.565252	0.297827	0.534079	0.898486	0.773855	0.871723
hsa-miR-4677-5p	No	No	1.7659	1.82852	1.99931	2.33976	1.99502	2.48647	-0.243607	0.0550422	0.298649	0.358423	0.857672	0.287156	0.820315	0.982423	0.711283
hsa-miR-4678	No	No	7.85125	9.30819	7.77959	10.7886	14.2679	9.85444	0.378838	-0.187332	-0.56617	0.149479	0.552364	0.0466048	0.629181	0.924399	0.331569
hsa-miR-4678-3p:Novel	No	No	3.33405	2.19791	2.459	4.16324	2.59858	2.6099	-0.664943	-0.564065	0.100879	0.00408606	0.0439015	0.704126	0.115816	0.448759	0.933113
hsa-miR-4679	No	No	5.1179	4.1909	4.38377	5.47735	4.81414	4.93141	-0.141269	-0.150109	-0.00883983	0.515131	0.560805	0.970034	0.885769	0.929432	0.997578
hsa-miR-4679-3p:Novel	No	No	3.53179	3.29687	3.11183	4.16916	3.99384	3.501	-0.00913142	-0.136356	-0.127224	0.970272	0.643016	0.633221	0.992486	0.956297	0.910854
hsa-miR-4680-3p	No	No	7.6704	5.69297	5.79591	8.25673	7.06938	6.05931	-0.227902	-0.446577	-0.218675	0.307168	0.097848	0.376352	0.786811	0.566855	0.781092
hsa-miR-4680-5p	No	No	2.42754	1.82285	2.30526	4.2214	3.19972	3.90313	-0.353084	0.0632189	0.416303	0.353027	0.888655	0.313009	0.817213	0.991239	0.722522
hsa-miR-4681	No	No	4.57329	5.51687	8.14954	11.8363	15.2296	10.3472	0.402458	-0.296627	-0.699085	0.283505	0.50854	0.0851016	0.761397	0.911072	0.446987
hsa-miR-4681-3p:Novel	No	No	1.37614	1.63885	1.96494	1.70518	1.89272	2.52324	0.15156	0.664119	0.512559	0.608264	0.0459135	0.0771899	0.915839	0.450812	0.431538
hsa-miR-4682	No	No	9.6078	8.94369	11.6694	11.4253	10.099	13.1671	-0.172646	0.201122	0.373768	0.359085	0.361097	0.0617288	0.820315	0.816391	0.377136
hsa-miR-4682-3p:Novel	No	No	3.94085	4.81582	2.89795	4.55085	8.45181	4.28236	0.827004	-0.0433006	-0.870304	0.00803516	0.909031	0.00997026	0.172172	0.993059	0.148821
hsa-miR-4683	No	Yes	1.4702	2.36353	1.3636	2.44587	4.98742	2.02156	0.986425	-0.322947	-1.30937	0.00856096	0.486817	0.00151279	0.17769	0.905123	0.041129
hsa-miR-4683-5p:Novel	No	Yes	2.71388	2.36353	4.38377	3.36846	3.08176	7.37975	-0.210207	1.02827	1.23848	0.463782	0.00133241	1.83475e-05	0.867757	0.0645213	0.00169297
hsa-miR-4684-3p	No	No	3.94085	3.25966	4.91234	5.0381	4.01134	5.35868	-0.375302	0.215489	0.590791	0.130663	0.454755	0.0254573	0.600972	0.88236	0.243462
hsa-miR-4684-5p	No	No	0	0	0	0.446794	0.528114	0.456198	0.0449013	0.0256754	-0.0192258	0.921796	0.962354	0.968285	NA	NA	NA
hsa-miR-4685-3p	No	No	0.697309	0.616591	0.681801	0.793114	0.914402	1.20752	0.0636833	0.602505	0.538821	0.87599	0.186925	0.17727	NA	0.685997	NA
hsa-miR-4685-5p	No	No	2.13507	1.84977	2.03738	2.35488	2.2275	2.14503	-0.086959	0.053738	0.140697	0.741114	0.863411	0.617982	0.942371	0.983212	0.902609
hsa-miR-4686	No	No	4.18386	4.5433	4.40966	4.69716	4.42774	4.39824	-0.112878	-0.132241	-0.0193626	0.545911	0.555745	0.924446	0.896518	0.926717	0.995573
hsa-miR-4686-3p:Novel	No	No	1.53311	1.39871	2.14748	1.8208	1.73156	2.30649	0.118284	0.314715	0.196431	0.68469	0.346156	0.504482	0.929346	0.806301	0.858028
hsa-miR-4687-3p	No	No	2.09193	2.04972	2.15441	2.51428	2.59108	2.05032	-0.0175452	-0.275361	-0.257816	0.952312	0.440268	0.426488	0.989581	0.87835	0.815401
hsa-miR-4687-5p	No	No	1.41283	1.7521	0.988996	1.7081	2.04375	1.13678	0.199154	-0.546383	-0.745537	0.548588	0.194938	0.0506233	0.897021	0.69454	0.34194
hsa-miR-4688	No	No	1.97043	1.8729	1.38316	2.00261	2.0524	1.86416	0.0712784	-0.0138499	-0.0851283	0.796845	0.966544	0.773032	0.956828	0.997645	0.957514
hsa-miR-4688-5p:Novel	No	No	1.27947	1.17726	1.38316	1.29879	1.51313	1.45842	0.159747	0.363588	0.203841	0.623503	0.332847	0.535059	NA	0.799585	0.872659
hsa-miR-4689	No	No	1.51834	1.59021	1.77934	1.99853	1.95006	1.84021	-0.0149801	-0.172721	-0.157741	0.957465	0.607306	0.603452	0.990076	0.944254	0.896298
hsa-miR-4689-3p:Novel	No	No	1.32807	1.10138	1.38593	1.58528	1.23745	2.04366	-0.416249	0.264954	0.681202	0.224991	0.488376	0.0535536	NA	0.905433	0.357611
hsa-miR-4690-3p	No	No	1.1375	1.3982	1.38316	1.5327	1.74967	1.8359	0.0412085	0.251954	0.210745	0.89735	0.502283	0.529195	0.976637	0.911072	0.870117
hsa-miR-4691-3p	No	No	2.58364	2.33071	2.45617	3.23286	2.70081	3.04017	-0.179138	-0.111623	0.0675151	0.498265	0.71903	0.811654	0.877802	0.967889	0.971096
hsa-miR-4691-5p	No	No	0	0	0.777959	0.7958	0.718077	0.944088	0.0301466	0.311607	0.28146	0.940683	0.503134	0.492289	NA	0.911072	NA
hsa-miR-4692	No	No	0.809179	0.911424	0	0.974243	1.09804	0.687253	0.14338	-0.600686	-0.744067	0.694319	0.200694	0.0791802	NA	0.700597	NA
hsa-miR-4692-5p:Novel	No	No	1.11135	1.27599	1.24947	1.54252	2.32603	1.82863	0.489108	0.0696397	-0.419469	0.134627	0.858781	0.220819	0.608708	0.982423	0.654715
hsa-miR-4693-5p	No	No	2.29967	2.51615	3.11183	3.03146	2.63049	3.58478	-0.14771	0.209042	0.356752	0.532193	0.440127	0.145312	0.894557	0.87835	0.56223
hsa-miR-4694-3p	No	No	1.24837	1.18177	1.39227	1.6952	2.33579	1.4694	0.417648	-0.0143892	-0.432038	0.309658	0.976947	0.330307	0.786811	0.998523	0.738768
hsa-miR-4694-5p	No	No	0	0	0	0.292161	0.336173	0.280925	0.220264	-0.224302	-0.444566	0.708324	0.750345	0.482469	NA	NA	NA
hsa-miR-4695-3p	No	No	1.27947	0.609508	0.491234	1.6289	0.9515	1.16639	-0.723144	-0.541368	0.181776	0.0320559	0.173626	0.634196	NA	0.672216	0.910854
hsa-miR-4695-5p	No	No	0.735102	0.501486	1.14222	0.925519	0.846921	1.14477	-0.15671	0.350367	0.507077	0.692384	0.428998	0.202616	NA	0.871948	NA
hsa-miR-4696	No	No	4.92607	4.31614	4.66775	5.11169	5.29777	5.8144	0.063798	0.353388	0.28959	0.753693	0.137462	0.172811	0.944715	0.636397	0.605803
hsa-miR-4696-3p:Novel	No	No	4.92607	4.04655	3.66203	6.93192	5.47137	4.67133	-0.352742	-0.472243	-0.119502	0.191967	0.147291	0.689659	0.680975	0.640049	0.929621
hsa-miR-4697-3p	No	No	0.766557	0	0	0.785646	0.573188	0.392712	-0.191881	-1.13685	-0.944974	0.627565	0.0276199	0.0483165	NA	NA	NA
hsa-miR-4697-5p	No	No	1.65693	1.09896	1.43165	1.57875	1.47753	1.65056	-0.175481	-0.0444778	0.131003	0.590937	0.907562	0.707602	0.908802	0.992487	0.933113
hsa-miR-4699-3p	No	No	3.38547	3.72381	3.40901	3.64778	3.85914	4.36356	0.109882	0.0912424	-0.0186398	0.598652	0.709328	0.931862	0.911614	0.967389	0.99597
hsa-miR-4699-5p	No	No	3.03668	3.10273	2.44135	3.58347	3.4721	3.48941	0.0290648	0.0134063	-0.0156585	0.912447	0.966049	0.956055	0.98212	0.997645	0.997578
hsa-miR-4700-3p	No	No	3.37176	3.5042	4.17681	4.0838	5.09993	5.79557	0.287977	0.681437	0.39346	0.369384	0.0703732	0.242115	0.828678	0.51256	0.677316
hsa-miR-4700-5p	No	No	3.54223	2.55199	2.6274	4.55632	2.95402	2.52415	-0.681736	-0.832481	-0.150745	0.00870728	0.00910056	0.61635	0.178684	0.206831	0.90168
hsa-miR-4701-3p	No	No	1.82932	2.46333	2.28444	2.58093	2.76148	3.77573	0.0753716	0.574766	0.499395	0.815967	0.124297	0.13529	0.96284	0.614292	0.546364
hsa-miR-4701-5p	No	No	0.735102	0	0	0.622801	0.538759	0.713958	-0.164611	0.181959	0.34657	0.704617	0.715311	0.43698	NA	NA	NA
hsa-miR-4703-3p	No	No	1.96281	2.19791	2.28444	4.95438	2.58958	8.26288	-0.511746	0.390426	0.902172	0.193071	0.385968	0.0283044	0.680987	0.839124	0.254239
hsa-miR-4703-5p	No	No	1.39462	1.27599	1.10241	1.7485	2.34259	1.41514	0.291789	-0.245161	-0.53695	0.399414	0.568814	0.163335	0.844676	0.932191	0.595634
hsa-miR-4704-3p	No	No	0	0	0	0.339364	0.252469	0.391537	-0.0889361	0.370168	0.459104	0.88271	0.599981	0.468851	NA	NA	NA
hsa-miR-4704-5p	No	No	0.914658	1.00012	0.461052	1.11028	1.28735	0.83552	0.241436	-0.55762	-0.799055	0.479646	0.205928	0.0432247	NA	0.705234	0.322596
hsa-miR-4705	No	No	2.94041	3.19184	2.6097	4.22279	3.78544	2.88453	-0.221455	-0.579114	-0.357659	0.412691	0.0803879	0.240329	0.845168	0.529941	0.67323
hsa-miR-4705-3p:Novel	No	No	1.53311	1.03367	1.3137	1.43283	1.2156	1.71805	-0.281841	0.2543	0.536141	0.384196	0.485977	0.107479	NA	0.904268	0.501877
hsa-miR-4706	No	No	5.55675	4.77063	4.40966	5.89455	5.23749	5.54184	-0.121049	-0.126719	-0.00566968	0.48571	0.539845	0.975959	0.877499	0.9204	0.997578
hsa-miR-4706-3p:Novel	No	No	7.86745	6.07239	6.24734	9.96647	9.25702	7.32491	-0.110428	-0.583864	-0.473436	0.642889	0.0425987	0.0716091	0.924876	0.444097	0.415333
hsa-miR-4707-3p	No	No	0	0	0	0.501697	0.596727	0.484452	0.209031	-0.323057	-0.532089	0.670205	0.586641	0.313869	NA	NA	NA
hsa-miR-4707-5p	No	No	3.20054	2.92069	2.85286	3.54883	3.29004	4.32214	-0.112337	0.100047	0.212384	0.652829	0.731099	0.421015	0.927188	0.970182	0.815388
hsa-miR-4708-3p	No	No	0.65719	0.687975	0.591806	0.911419	1.43756	0.872524	0.728002	-0.223354	-0.951355	0.101123	0.681442	0.045409	NA	0.962808	0.328643
hsa-miR-4708-5p	No	No	0.914658	0	0	1.06407	0.712117	0.564294	-0.551477	-0.739176	-0.187699	0.135141	0.107552	0.666953	NA	0.580191	NA
hsa-miR-4709-3p	No	No	1.39462	1.62656	2.13965	2.11949	2.14726	2.12842	0.0905613	0.0300006	-0.0605606	0.75323	0.930241	0.843396	0.944715	0.994924	0.978757
hsa-miR-4709-5p	No	No	1.10419	0.642346	0.982468	1.55027	1.02584	1.41832	-0.584306	-0.231092	0.353214	0.103896	0.578449	0.367028	NA	0.938571	0.773573
hsa-miR-4710	No	No	4.06641	3.27769	2.15441	3.72439	3.58485	2.22207	-0.0994786	-0.765298	-0.665819	0.643139	0.00575795	0.00924607	0.924876	0.148916	0.142193
hsa-miR-4710-3p:Novel	No	No	1.10419	0.687975	1.09594	1.28465	1.06626	1.19818	-0.328143	0.104002	0.432145	0.385803	0.812699	0.283743	NA	0.977782	0.707296
hsa-miR-4711-3p	No	Yes	2.62876	1.59021	2.15441	4.56446	2.09877	3.04424	-1.16637	-0.636654	0.529716	0.000484874	0.103683	0.153023	0.0337411	0.573422	0.578828
hsa-miR-4711-5p	No	No	0.828465	0.250743	0.715827	0.904297	0.741483	0.883177	-0.226823	-0.0401913	0.186632	0.547421	0.925598	0.633642	NA	0.994681	NA
hsa-miR-4712-3p	No	No	2.56043	2.04972	2.49894	2.82814	2.62694	2.92504	-0.19614	0.0959323	0.292072	0.391016	0.714603	0.220538	0.843465	0.967889	0.654715
hsa-miR-4712-5p	No	No	0.861214	0.616591	0	1.0514	1.08519	1.01252	-0.0855383	0.0753753	0.160914	0.823553	0.868669	0.695885	NA	0.983309	0.930817
hsa-miR-4713-3p	No	No	0	0.929863	0	0.705811	1.01324	0.510585	0.474841	-0.141548	-0.616389	0.237439	0.779	0.159841	NA	0.976845	NA
hsa-miR-4713-5p	No	No	0	0	0	0.330982	0.418069	0.378086	0.392059	-0.190869	-0.582928	0.463762	0.767527	0.3106	NA	NA	NA
hsa-miR-4714-3p	No	No	0.65719	0	0	0.755039	0.904092	0.663894	0.125474	-0.1931	-0.318574	0.775754	0.719562	0.507304	NA	0.967889	NA
hsa-miR-4714-5p	No	No	1.77444	1.30385	1.3137	1.97885	1.68819	1.63195	-0.404351	-0.395238	0.00911308	0.139154	0.227151	0.976245	0.620661	0.728662	0.997578
hsa-miR-4715-3p	No	No	1.06753	0	0.482992	0.833057	0.538394	0.683231	-0.504162	-0.456165	0.0479969	0.200379	0.334931	0.913826	NA	NA	NA
hsa-miR-4715-5p	No	No	0.809179	0.642346	0	0.89555	1.10705	0.682854	0.0445762	-0.157916	-0.202492	0.902667	0.72368	0.612677	NA	0.967889	NA
hsa-miR-4716-3p	No	No	2.2227	2.5932	2.20483	7.39028	3.38365	2.78617	-1.10643	-1.36299	-0.256559	0.0020557	0.00183867	0.530184	0.0722511	0.0756415	0.870575
hsa-miR-4716-5p	No	No	0	0.616591	0	0.59681	0.827645	0.505384	0.506516	-0.457988	-0.964504	0.222669	0.38541	0.0360749	NA	NA	NA
hsa-miR-4717-3p	No	No	2.24784	2.51615	1.84791	2.35983	2.86005	1.88126	0.344258	-0.112824	-0.457081	0.194652	0.730225	0.114673	0.680987	0.970182	0.513293
hsa-miR-4718	No	No	3.53179	3.18042	3.32247	4.19819	3.71171	3.80326	-0.20716	0.017026	0.224186	0.386801	0.952036	0.385493	0.84126	0.997645	0.784842
hsa-miR-4718-3p:Novel	No	No	2.24784	1.37595	1.42643	4.36789	3.04634	1.76963	-0.463721	-1.32593	-0.862207	0.206824	0.00404622	0.0438474	0.692413	0.121055	0.325647
hsa-miR-4719	No	No	1.41283	1.5181	1.55592	2.38418	1.72515	2.26757	-0.519964	-0.0369892	0.482975	0.0524471	0.903621	0.0913086	0.435511	0.992004	0.464941
hsa-miR-4719-5p:Novel	No	No	3.28595	2.73427	2.49894	4.09025	4.60961	2.92144	0.21042	-0.335036	-0.545456	0.490414	0.369649	0.106078	0.877802	0.822286	0.500787
hsa-miR-4720-3p	No	No	0.882948	0.936452	0.681801	1.53007	1.05249	0.676093	-0.535469	-0.968309	-0.43284	0.112575	0.0280446	0.301993	NA	0.36347	0.718413
hsa-miR-4720-5p	No	No	0.580915	0	0	0.842017	0.477665	0.695762	-0.795589	-0.401961	0.393628	0.0789361	0.447289	0.432283	NA	NA	NA
hsa-miR-4721	No	No	1.1375	1.26634	1.14222	1.31554	1.76977	1.2962	0.302078	0.111682	-0.190396	0.340138	0.769833	0.567783	NA	0.976522	0.883601
hsa-miR-4721-5p:Novel	No	No	3.20054	3.00037	3.33218	3.39159	4.61258	3.20315	0.351529	-0.1971	-0.548629	0.188467	0.543744	0.0587981	0.678688	0.9204	0.370669
hsa-miR-4722-3p	No	No	0	0	0	0.516411	0.428042	0.555578	-0.131616	-0.019346	0.11227	0.784975	0.972714	0.825437	NA	NA	NA
hsa-miR-4722-5p	No	No	0.766557	0.799326	0	1.28351	0.885299	1.06389	-0.468504	-0.45778	0.0107237	0.200491	0.294553	0.979139	NA	0.773855	0.998204
hsa-miR-4723-3p	No	No	0.697309	0.616591	0.869901	0.888493	1.11679	0.964724	0.122897	-0.0663926	-0.18929	0.748202	0.88616	0.647344	NA	0.990037	0.916803
hsa-miR-4723-5p	No	No	1.11135	0	0.591806	1.47512	0.650762	0.784728	-1.12644	-0.743862	0.382574	0.00744401	0.140052	0.433078	NA	0.637962	NA
hsa-miR-4724-3p	No	No	2.20531	1.78874	0.869901	2.4902	1.86179	1.51768	-0.470564	-0.873094	-0.40253	0.0669437	0.00837152	0.199069	0.483561	0.195737	0.634063
hsa-miR-4724-5p	No	No	3.31257	2.80935	3.4796	3.68435	3.7765	3.93175	-0.0115296	0.0481375	0.0596671	0.959652	0.857502	0.804937	0.990076	0.982423	0.97047
hsa-miR-4725-3p	No	No	3.94085	4.09712	3.32247	4.03918	4.55599	3.74911	0.187893	-0.193872	-0.381766	0.353713	0.432631	0.0839987	0.817883	0.876044	0.446281
hsa-miR-4725-5p	No	No	5.52095	4.77063	4.38377	9.62486	9.59128	5.95829	-0.00152533	-0.55512	-0.553594	0.996452	0.179367	0.140626	0.998563	0.679422	0.55324
hsa-miR-4726-3p	No	No	0.67847	0.531973	0	1.01321	0.810988	0.724733	-0.237259	-0.345096	-0.107837	0.539956	0.457478	0.800643	NA	0.886056	NA
hsa-miR-4726-5p	No	No	0	0	0	0.680792	0.525759	0.533922	-0.110046	0.111055	0.221101	0.808227	0.832675	0.638485	NA	NA	NA
hsa-miR-4727-3p	No	No	0.640108	0.649043	0	0.835665	0.856975	0.531405	-0.12319	-0.550529	-0.427339	0.76127	0.271744	0.350774	NA	0.765253	NA
hsa-miR-4727-5p	No	No	0	0	0	0.524533	0.474263	0.526773	-0.215859	0.382669	0.598528	0.660582	0.495183	0.232806	NA	NA	NA
hsa-miR-4728-3p	No	No	0.735102	0	0.666437	0.943389	0.641874	0.941952	-0.469656	-0.0559224	0.413733	0.26237	0.907591	0.35509	NA	0.992487	NA
hsa-miR-4728-5p	No	No	0	0	0	0.574666	0.60373	0.424629	-0.117833	-0.440582	-0.322749	0.807686	0.453013	0.543541	NA	NA	NA
hsa-miR-4729	No	No	1.51834	2.12599	1.55592	1.64293	2.39343	1.84801	0.588804	0.307996	-0.280808	0.0286082	0.336808	0.300123	0.322517	0.805028	0.717506
hsa-miR-4729-3p:Novel	No	No	0.67847	0.651927	0.461977	1.26426	0.935243	0.931152	-0.313901	-0.773008	-0.459107	0.423432	0.107875	0.305169	NA	0.580191	0.722019
hsa-miR-4730	No	No	8.61214	6.50625	8.84222	10.0147	9.58836	16.3623	-0.0866248	0.690135	0.77676	0.743631	0.0260005	0.00559645	0.942371	0.353563	0.0999587
hsa-miR-4730-3p:Novel	No	No	1.97157	1.94713	1.99931	2.63396	2.51819	2.31479	-0.0604062	-0.241168	-0.180762	0.812619	0.431384	0.516341	0.961962	0.875156	0.863404
hsa-miR-4731-3p	No	No	0	0	0	0.353241	0.293788	0.238241	-0.38948	-0.678958	-0.289478	0.497397	0.324206	0.64352	NA	NA	NA
hsa-miR-4731-5p	No	No	0.735102	0.616591	0	0.715488	0.714567	0.793488	-0.046935	-0.183156	-0.136221	0.906933	0.701065	0.750744	NA	NA	NA
hsa-miR-4732-3p	No	No	0	0.649043	0.869901	0.553427	0.969129	1.18285	0.927082	0.965509	0.0384273	0.0288471	0.0455471	0.920971	NA	0.450743	NA
hsa-miR-4732-5p	No	No	2.4854	2.19791	2.0454	2.65783	2.75209	2.42236	-0.0106713	-0.0214033	-0.010732	0.967532	0.945563	0.96973	0.992417	0.997645	0.997578
hsa-miR-4733-3p	No	No	1.10419	0.501486	0	1.31198	0.801349	0.425723	-0.755611	-1.58272	-0.827106	0.0455901	0.00162786	0.0886977	NA	0.0706911	NA
hsa-miR-4733-5p	No	No	0	0	0	0.245201	0.390005	0.397181	0.106306	0.478683	0.372377	0.855278	0.483581	0.542756	NA	NA	NA
hsa-miR-4734	No	No	1.27947	1.59021	1.3137	1.45811	1.64344	1.5428	0.166756	0.022103	-0.144653	0.544952	0.946847	0.620438	0.896518	0.997645	0.904372
hsa-miR-4734-5p:Novel	No	No	4.59934	4.66143	3.22781	5.31176	7.25852	3.92804	0.429557	-0.488584	-0.918141	0.113776	0.143488	0.00229033	0.570179	0.638638	0.0549139
hsa-miR-4735-3p	No	No	0	0.651927	0	0.612996	0.881067	0.640476	0.421	0.0678502	-0.35315	0.311483	0.893159	0.417432	NA	0.991492	NA
hsa-miR-4735-5p	No	No	1.10419	0.776904	1.10749	1.40046	1.13	1.13493	-0.287019	-0.109063	0.177956	0.400538	0.79036	0.637222	NA	0.97765	0.911432
hsa-miR-4736	No	No	4.72297	5.45875	4.42996	7.05081	6.65054	6.00197	-0.127975	-0.239786	-0.111811	0.631487	0.453538	0.70111	0.924781	0.881341	0.933113
hsa-miR-4736-3p:Novel	No	No	0.735102	0.615833	0	1.09006	0.82906	0.530652	-0.341038	-0.871639	-0.530601	0.414729	0.0998058	0.28311	NA	0.569068	NA
hsa-miR-4737	No	No	3.44486	4.8725	3.92987	3.99534	4.80018	5.02254	0.277735	0.302109	0.024374	0.184837	0.217353	0.91	0.674833	0.717887	0.993963
hsa-miR-4737-3p:Novel	No	No	3.9842	4.68226	4.17681	5.9921	10.3447	5.98407	0.770407	-0.0313812	-0.801789	0.0315112	0.941992	0.0383885	0.339034	0.997645	0.302831
hsa-miR-4738-3p	No	No	1.35694	1.2422	2.14748	1.82436	1.33338	2.2418	-0.427657	0.344646	0.772303	0.127087	0.263444	0.00664098	0.595028	0.757417	0.111109
hsa-miR-4738-5p	No	No	0	0	0	0.415455	0.53775	0.186461	0.0980749	-0.402787	-0.500862	0.850091	0.522409	0.375841	NA	NA	NA
hsa-miR-4739	No	No	3.54223	3.25313	2.66575	3.53188	3.4037	3.08522	-0.0799141	-0.292349	-0.212435	0.715624	0.273689	0.382733	0.935784	0.765948	0.784842
hsa-miR-4739-3p:Novel	No	No	4.23848	3.25313	3.55867	4.09145	3.83845	3.91474	-0.0907133	-0.191959	-0.101245	0.648764	0.419727	0.639765	0.925808	0.862851	0.911432
hsa-miR-4740-3p	No	No	0	0	0	0.393222	0.544651	0.199144	0.43533	-0.422889	-0.858219	0.426332	0.524375	0.146612	NA	NA	NA
hsa-miR-4740-5p	No	No	1.35694	1.37889	1.39227	1.97776	1.97077	1.96536	0.0293333	-0.0426296	-0.071963	0.928267	0.913508	0.838849	0.982695	0.99394	0.977743
hsa-miR-4741	No	No	1.53311	1.39214	1.42643	2.23846	2.86546	1.85137	0.23467	-0.304584	-0.539254	0.489379	0.463138	0.149232	0.877802	0.889746	0.569437
hsa-miR-4741-5p:Novel	No	No	2.62876	3.00037	2.6274	2.98243	3.98655	2.79625	0.335931	-0.126851	-0.462782	0.163494	0.666937	0.0772375	0.644199	0.961217	0.431538
hsa-miR-4742-3p	No	No	2.75227	3.00037	2.15441	3.11601	3.39701	2.31718	0.125878	-0.33109	-0.456969	0.595685	0.259248	0.0843053	0.910333	0.755113	0.446281
hsa-miR-4742-5p	No	No	1.06753	0.909792	0.777959	0.870921	1.13267	1.31685	0.304651	0.256074	-0.0485769	0.397421	0.543955	0.894284	NA	0.9204	0.991659
hsa-miR-4743-3p	No	No	1.82932	2.14967	1.97799	2.63743	2.88164	2.36026	0.0355253	-0.185456	-0.220981	0.893147	0.562669	0.445295	0.976637	0.931096	0.822269
hsa-miR-4743-5p	No	No	1.39462	0.899229	1.22068	1.73372	1.16008	1.44627	-0.483997	-0.126248	0.357748	0.13839	0.736814	0.308471	NA	0.970182	0.722522
hsa-miR-4744	No	No	5.59675	4.89547	5.72662	12.7163	11.6704	8.81552	-0.457056	-0.626218	-0.169162	0.211336	0.152651	0.671652	0.69549	0.651245	0.925021
hsa-miR-4744-3p:Novel	No	No	3.38547	3.25313	3.55084	3.66814	4.14836	3.60919	0.157177	0.0675086	-0.0896682	0.523034	0.818717	0.733856	0.890674	0.977782	0.940827
hsa-miR-4745-3p	No	No	0	0	0.461977	0.476028	0.552373	0.661638	-0.0686423	0.27394	0.342582	0.87783	0.592936	0.450761	NA	NA	NA
hsa-miR-4745-5p	No	No	0	0	0	0.658481	0.748831	0.709057	0.213184	0.332336	0.119152	0.655163	0.552625	0.808642	NA	NA	NA
hsa-miR-4746-3p	No	No	1.16183	1.00012	1.3137	1.14342	1.08023	1.23803	-0.0612326	0.00128571	0.0625183	0.85275	0.997338	0.856605	NA	0.999681	0.981983
hsa-miR-4746-5p	No	No	1.16183	0.899229	1.33287	1.50145	0.929968	1.62292	-0.549598	0.130791	0.680389	0.0976131	0.72107	0.0479296	NA	0.967889	0.332792
hsa-miR-4747-3p	No	No	0	0	0	0.239696	0.394146	0.686737	0.189385	0.780814	0.591428	0.754233	0.26379	0.341695	NA	NA	NA
hsa-miR-4747-5p	No	No	0	0.615833	0	0.268475	0.793846	0.328174	1.15802	0.0170472	-1.14097	0.0175288	0.977567	0.0297344	NA	NA	NA
hsa-miR-4748	No	No	5.61768	6.3317	5.54372	6.51361	8.2453	8.39999	0.338248	0.501744	0.163496	0.188367	0.0989409	0.547374	0.678688	0.567571	0.880141
hsa-miR-4748-3p:Novel	No	No	1.96281	1.79846	1.6139	1.88863	1.92593	2.05698	-0.050044	-0.000455973	0.049588	0.859132	0.998888	0.866354	0.971729	0.999681	0.986186
[truncated: 1,526 more rows]

## Sheet: C_Target_Genes
database	mature_mirna_id	target_symbol	target_entrez	experiment	pubmed_id
mirtarbase	hsa-miR-26b-5p	DEC1	50514	Microarray	19088304
mirtarbase	hsa-miR-26b-5p	MARCH2	54996	Microarray	19088304
mirtarbase	hsa-miR-26b-5p	AAMDC	28971	Microarray	19088304
mirtarbase	hsa-miR-143-3p	ABAT	18	HITS-CLIP	19536157
mirtarbase	hsa-miR-26a-5p	ABCA1	19	Immunoblot//Luciferase reporter assay//qRT-PCR	22673513
mirtarbase	hsa-miR-26b-5p	ABCA1	19	Immunoblot//Luciferase reporter assay//qRT-PCR	22673513
mirtarbase	hsa-miR-26b-5p	ABCA1	19	Microarray	19088304
mirtarbase	hsa-miR-27a-3p	ABCA1	19	Luciferase reporter assay	23451058
mirtarbase	hsa-miR-27a-3p	ABCA1	19	Luciferase reporter assay//qRT-PCR//Western blot	24608080
mirtarbase	hsa-miR-27b-3p	ABCA1	19	Luciferase reporter assay//qRT-PCR//Western blot	24608080
mirtarbase	hsa-miR-27b-3p	ABCA1	19	Luciferase reporter assay//qRT-PCR//Western blot	26520906
mirtarbase	hsa-miR-26b-5p	ABCA6	23460	Microarray	19088304
mirtarbase	hsa-miR-21-5p	ABCB1	5243	Flow//qRT-PCR//Western blot	27040946
mirtarbase	hsa-miR-26b-5p	ABCB6	10058	Microarray	19088304
mirtarbase	hsa-miR-26a-5p	ABCB7	22	CLASH	23622248
mirtarbase	hsa-miR-26a-5p	ABCB9	23457	CLASH	23622248
mirtarbase	hsa-miR-7-5p	ABCC1	4363	Immunohistochemistry//Luciferase reporter assay//qRT-PCR	26108539
mirtarbase	hsa-miR-7-5p	ABCC1	4363	Luciferase reporter assay//Western blot	20099276
mirtarbase	hsa-miR-7-5p	ABCC1	4363	Microarray	19073608
mirtarbase	hsa-miR-142-3p	ABCC9	10060	Microarray	17612493
mirtarbase	hsa-miR-26b-5p	ABCD1	215	Microarray	19088304
mirtarbase	hsa-miR-21-5p	ABCD3	5825	Microarray	18591254
mirtarbase	hsa-miR-26b-5p	ABCD4	5826	Microarray	19088304
mirtarbase	hsa-miR-203a-3p	ABCE1	6059	Luciferase reporter assay//qRT-PCR//Western blot	19843643
mirtarbase	hsa-miR-26b-5p	ABCF1	23	Microarray	19088304
mirtarbase	hsa-miR-142-3p	ABCG2	9429	Luciferase reporter assay//Western blot	23619912
mirtarbase	hsa-miR-181a-5p	ABCG2	9429	Luciferase reporter assay//Microarray//qRT-PCR//Western blot	23780685
mirtarbase	hsa-miR-26b-5p	ABCG2	9429	Microarray	19088304
mirtarbase	hsa-miR-26b-5p	ABCG4	64137	Microarray	19088304
mirtarbase	hsa-miR-223-5p	ABHD13	84945	PAR-CLIP	20371350
mirtarbase	hsa-miR-223-5p	ABHD13	84945	PAR-CLIP	21572407
mirtarbase	hsa-miR-223-5p	ABHD13	84945	PAR-CLIP	23446348
mirtarbase	hsa-let-7f-5p	ABHD17C	58489	PAR-CLIP	20371350
mirtarbase	hsa-let-7g-5p	ABHD17C	58489	PAR-CLIP	20371350
mirtarbase	hsa-miR-27a-3p	ABHD17C	58489	HITS-CLIP	22473208
mirtarbase	hsa-miR-27a-3p	ABHD17C	58489	Sequencing//PAR-CLIP	20371350
mirtarbase	hsa-miR-27b-3p	ABHD17C	58489	HITS-CLIP	22473208
mirtarbase	hsa-miR-27b-3p	ABHD17C	58489	PAR-CLIP	20371350
mirtarbase	hsa-miR-223-5p	ABHD18	80167	PAR-CLIP	21572407
mirtarbase	hsa-miR-223-5p	ABHD18	80167	PAR-CLIP	23446348
mirtarbase	hsa-miR-26a-5p	ABHD2	11057	HITS-CLIP	22473208
mirtarbase	hsa-miR-26b-5p	ABHD2	11057	HITS-CLIP	22473208
mirtarbase	hsa-miR-221-3p	ABHD3	171586	Sequencing	20371350
mirtarbase	hsa-miR-223-5p	ABI2	10152	PAR-CLIP	21572407
mirecords	hsa-miR-203a-3p	ABL1	25	immunoblotting	18538733
mirtarbase	hsa-miR-203a-3p	ABL1	25	Immunoprecipitaion//qRT-PCR//Western blot	23462723
mirtarbase	hsa-miR-203a-3p	ABL1	25	Luciferase reporter assay	18538733
mirtarbase	hsa-miR-203a-3p	ABL1	25	qRT-PCR//Western blot	23968727
mirtarbase	hsa-miR-27a-3p	ABL2	27	HITS-CLIP	22473208
mirtarbase	hsa-miR-27b-3p	ABL2	27	HITS-CLIP	22473208
mirtarbase	hsa-miR-148a-3p	ABLIM1	3983	HITS-CLIP	23824327
mirtarbase	hsa-miR-148a-3p	ABLIM1	3983	HITS-CLIP	27418678
mirtarbase	hsa-miR-221-3p	ABLIM1	3983	PAR-CLIP	22100165
mirtarbase	hsa-miR-221-3p	ABLIM1	3983	PAR-CLIP	22291592
mirtarbase	hsa-miR-221-3p	ABLIM1	3983	PAR-CLIP	23708386
mirtarbase	hsa-let-7f-5p	ABT1	29777	HITS-CLIP	23313552
mirtarbase	hsa-let-7f-5p	ABT1	29777	PAR-CLIP	21572407
mirtarbase	hsa-let-7f-5p	ABT1	29777	PAR-CLIP	23592263
mirtarbase	hsa-let-7f-5p	ABT1	29777	PAR-CLIP	24398324
mirtarbase	hsa-let-7f-5p	ABT1	29777	PAR-CLIP	27292025
mirtarbase	hsa-let-7g-5p	ABT1	29777	HITS-CLIP	23313552
mirtarbase	hsa-let-7g-5p	ABT1	29777	PAR-CLIP	21572407
mirtarbase	hsa-let-7g-5p	ABT1	29777	PAR-CLIP	23592263
mirtarbase	hsa-let-7g-5p	ABT1	29777	PAR-CLIP	24398324
mirtarbase	hsa-let-7g-5p	ABT1	29777	PAR-CLIP	27292025
mirtarbase	hsa-miR-26b-5p	ACAA2	10449	Microarray	19088304
mirtarbase	hsa-miR-142-3p	ACACA	31	HITS-CLIP	22473208
mirtarbase	hsa-miR-26b-5p	ACADM	34	Microarray	19088304
mirtarbase	hsa-miR-26b-5p	ACADS	35	Microarray	19088304
mirtarbase	hsa-miR-26b-5p	ACADSB	36	Microarray	19088304
mirtarbase	hsa-miR-181a-5p	ACAN	176	Microarray	22942087
mirtarbase	hsa-miR-21-5p	ACAT1	38	Microarray	18591254
mirtarbase	hsa-miR-142-3p	ACBD3	64746	PAR-CLIP	23592263
mirtarbase	hsa-miR-26b-5p	ACBD3	64746	Microarray	19088304
mirtarbase	hsa-miR-142-3p	ACBD5	91452	PAR-CLIP	21572407
mirtarbase	hsa-miR-21-5p	ACBD5	91452	Microarray	18591254
mirtarbase	hsa-miR-21-5p	ACBD5	91452	Sequencing	20371350
mirtarbase	hsa-miR-223-5p	ACBD5	91452	PAR-CLIP	21572407
mirtarbase	hsa-miR-26a-5p	ACBD5	91452	HITS-CLIP	23313552
mirtarbase	hsa-miR-26b-5p	ACBD5	91452	HITS-CLIP	23313552
mirtarbase	hsa-miR-26b-5p	ACE2	59272	Microarray	19088304
mirtarbase	hsa-let-7f-5p	ACER2	340485	PAR-CLIP	24398324
mirtarbase	hsa-let-7g-5p	ACER2	340485	PAR-CLIP	24398324
mirtarbase	hsa-miR-27a-3p	ACER2	340485	PAR-CLIP	24398324
mirtarbase	hsa-miR-27b-3p	ACER2	340485	PAR-CLIP	24398324
mirtarbase	hsa-miR-142-5p	ACER3	55331	PAR-CLIP	20371350
mirtarbase	hsa-miR-142-5p	ACER3	55331	PAR-CLIP	22012620
mirtarbase	hsa-miR-142-5p	ACER3	55331	PAR-CLIP	23446348
mirtarbase	hsa-miR-142-5p	ACER3	55331	PAR-CLIP//HITS-CLIP	21572407
mirtarbase	hsa-miR-221-3p	ACIN1	22985	CLASH	23622248
mirtarbase	hsa-miR-22-3p	ACLY	47	Luciferase reporter assay//qRT-PCR//Western blot	27317765
mirtarbase	hsa-miR-181a-5p	ACOT12	134526	Microarray	17612493
mirtarbase	hsa-miR-7-5p	ACOT4	122970	Microarray	17612493
mirtarbase	hsa-let-7f-5p	ACOT9	23597	PAR-CLIP	23446348
mirtarbase	hsa-let-7f-5p	ACOT9	23597	PAR-CLIP	23592263
mirtarbase	hsa-let-7g-5p	ACOT9	23597	PAR-CLIP	23446348
mirtarbase	hsa-let-7g-5p	ACOT9	23597	PAR-CLIP	23592263
mirtarbase	hsa-miR-143-3p	ACOT9	23597	HITS-CLIP	22927820
mirtarbase	hsa-miR-26b-5p	ACOX2	8309	Microarray	19088304
mirtarbase	hsa-miR-1290	ACSBG1	23205	HITS-CLIP	19536157
mirtarbase	hsa-miR-1290	ACSBG1	23205	HITS-CLIP	23824327
mirtarbase	hsa-miR-26b-5p	ACSF2	80221	Microarray	19088304
mirtarbase	hsa-miR-142-3p	ACSL1	2180	HITS-CLIP	22473208
mirtarbase	hsa-miR-221-3p	ACSL3	2181	Sequencing	20371350
mirtarbase	hsa-miR-26a-5p	ACSL3	2181	HITS-CLIP	22473208
mirtarbase	hsa-miR-26b-5p	ACSL3	2181	HITS-CLIP	22473208
mirtarbase	hsa-miR-142-3p	ACSL4	2182	HITS-CLIP	22473208
mirtarbase	hsa-let-7f-5p	ACTA1	58	PAR-CLIP	21572407
mirtarbase	hsa-let-7g-5p	ACTA1	58	PAR-CLIP	21572407
mirecords	hsa-miR-21-5p	ACTA2	59		17991735
mirtarbase	hsa-miR-221-3p	ACTB	60	CLASH	23622248
mirtarbase	hsa-miR-142-5p	ACTC1	70	HITS-CLIP	27418678
mirtarbase	hsa-miR-30e-5p	ACTC1	70	HITS-CLIP	27418678
mirtarbase	hsa-miR-7-5p	ACTC1	70	HITS-CLIP	27418678
mirtarbase	hsa-miR-221-3p	ACTG1	71	CLASH	23622248
mirtarbase	hsa-miR-26a-5p	ACTL8	81569	CLASH	23622248
mirtarbase	hsa-miR-7-5p	ACTN2	88	Microarray	17612493
mirtarbase	hsa-miR-142-5p	ACTN4	81	PAR-CLIP	20371350
mirtarbase	hsa-miR-142-5p	ACTN4	81	PAR-CLIP	21572407
mirtarbase	hsa-miR-142-5p	ACTN4	81	PAR-CLIP	23446348
mirtarbase	hsa-miR-26a-5p	ACTN4	81	CLASH	23622248
mirtarbase	hsa-let-7f-5p	ACTR10	55860	Microarray	22942087
mirtarbase	hsa-miR-21-5p	ACTR2	10097	Microarray	18591254
mirtarbase	hsa-miR-26b-5p	ACTR5	79913	Microarray	19088304
mirtarbase	hsa-miR-26b-5p	ACTR8	93973	Microarray	19088304
mirtarbase	hsa-miR-148a-3p	ACVR1	90	Luciferase reporter assay	22408438
mirtarbase	hsa-miR-148a-3p	ACVR1	90	Luciferase reporter assay//qRT-PCR	25271001
mirtarbase	hsa-miR-26a-5p	ACVR1	90	Luciferase reporter assay//qRT-PCR	23227223
mirtarbase	hsa-miR-26b-5p	ACVR1B	91	CLASH	23622248
mirtarbase	hsa-miR-7-5p	ACVR1B	91	Microarray	17612493
mirtarbase	hsa-miR-22-3p	ACVR1C	130399	Luciferase reporter assay//Western blot//Reporter assay;Western blot	21224400
mirtarbase	hsa-miR-203a-3p	ACVR2B	93	PAR-CLIP	22291592
mirtarbase	hsa-miR-221-3p	ACVR2B	93	Microarray	22942087
mirtarbase	hsa-miR-181a-5p	ACYP1	97	HITS-CLIP	22473208
mirtarbase	hsa-miR-181a-5p	ADAM17	6868	HITS-CLIP	23313552
mirtarbase	hsa-miR-26a-5p	ADAM17	6868	Immunofluorescence//Luciferase reporter assay//Microarray//qRT-PCR//Western blot	24375761
mirtarbase	hsa-miR-26a-5p	ADAM17	6868	PAR-CLIP	24398324
mirtarbase	hsa-miR-26b-5p	ADAM17	6868	PAR-CLIP	24398324
mirtarbase	hsa-miR-26b-5p	ADAM18	8749	Microarray	19088304
mirtarbase	hsa-miR-221-3p	ADAM1A	8759	Luciferase reporter assay	24736554
mirtarbase	hsa-miR-26b-5p	ADAM29	11086	Microarray	19088304
mirtarbase	hsa-miR-26b-5p	ADAM9	8754	Microarray	19088304
mirtarbase	hsa-miR-30e-5p	ADAM9	8754	HITS-CLIP	23313552
mirtarbase	hsa-miR-26b-5p	ADAMTS1	9510	Microarray	19088304
mirtarbase	hsa-miR-26b-5p	ADAMTS12	81792	Microarray	19088304
mirtarbase	hsa-miR-7-5p	ADAMTS17	170691	Microarray	17612493
mirtarbase	hsa-miR-143-3p	ADAMTS4	9507	HITS-CLIP	23824327
mirtarbase	hsa-miR-143-3p	ADAMTS4	9507	HITS-CLIP	27418678
mirtarbase	hsa-miR-143-3p	ADAMTS4	9507	PAR-CLIP	23446348
mirtarbase	hsa-miR-27a-3p	ADAMTS5	11096	HITS-CLIP	23824327
mirtarbase	hsa-miR-27b-3p	ADAMTS5	11096	HITS-CLIP	23824327
mirtarbase	hsa-miR-221-3p	ADAMTS6	11174	Luciferase reporter assay//qRT-PCR//Western blot	27542224
mirtarbase	hsa-miR-223-5p	ADAMTS9	56999	HITS-CLIP	21572407
mirtarbase	hsa-miR-26b-5p	ADAP2	55803	Microarray	19088304
mirtarbase	hsa-miR-27a-3p	ADAR	103	HITS-CLIP	22473208
mirtarbase	hsa-miR-27b-3p	ADAR	103	HITS-CLIP	22473208
mirtarbase	hsa-miR-148a-3p	ADARB1	104	Sequencing	20371350
mirtarbase	hsa-miR-26b-5p	ADARB1	104	Sequencing	20371350
mirtarbase	hsa-miR-223-5p	ADAT2	134637	HITS-CLIP	23824327
mirtarbase	hsa-miR-223-5p	ADAT2	134637	HITS-CLIP	27418678
mirtarbase	hsa-miR-181a-5p	ADCY9	115	PAR-CLIP	26701625
mirtarbase	hsa-miR-7-5p	ADCY9	115	Microarray	19073608
mirtarbase	hsa-miR-221-3p	ADD1	118	CLASH	23622248
mirtarbase	hsa-miR-27a-3p	ADD1	118	PAR-CLIP	24398324
mirtarbase	hsa-miR-27b-3p	ADD1	118	PAR-CLIP	24398324
mirtarbase	hsa-miR-1290	ADD2	119	PAR-CLIP	22012620
mirtarbase	hsa-miR-223-5p	ADD2	119	HITS-CLIP	21572407
mirtarbase	hsa-miR-26b-5p	ADGB	79747	Microarray	19088304
mirtarbase	hsa-miR-26b-5p	ADGRE5	976	Microarray	19088304
mirtarbase	hsa-miR-21-5p	ADGRG2	10149	Microarray	18591254
mirtarbase	hsa-miR-26b-5p	ADGRG6	57211	Microarray	19088304
mirtarbase	hsa-miR-26a-5p	ADGRG7	84873	PAR-CLIP	26701625
mirtarbase	hsa-miR-26b-5p	ADGRG7	84873	PAR-CLIP	26701625
mirtarbase	hsa-miR-27a-3p	ADGRL1	22859	PAR-CLIP	26701625
mirtarbase	hsa-miR-27b-3p	ADGRL1	22859	PAR-CLIP	26701625
mirtarbase	hsa-miR-221-3p	ADGRL2	23266	CLASH	23622248
mirtarbase	hsa-miR-26b-5p	ADGRL2	23266	Microarray	19088304
mirtarbase	hsa-miR-223-5p	ADH1B	125	PAR-CLIP//HITS-CLIP	21572407
mirtarbase	hsa-let-7f-5p	ADH5	128	HITS-CLIP	23313552
mirtarbase	hsa-let-7f-5p	ADH5	128	PAR-CLIP	26701625
mirtarbase	hsa-let-7f-5p	ADH5	128	PAR-CLIP	27292025
mirtarbase	hsa-let-7g-5p	ADH5	128	HITS-CLIP	23313552
mirtarbase	hsa-let-7g-5p	ADH5	128	PAR-CLIP	26701625
mirtarbase	hsa-let-7g-5p	ADH5	128	PAR-CLIP	27292025
mirtarbase	hsa-miR-143-3p	ADH5	128	HITS-CLIP	23824327
mirtarbase	hsa-miR-142-5p	ADI1	55256	HITS-CLIP	19536157
mirtarbase	hsa-miR-26b-5p	ADI1	55256	Microarray	19088304
mirtarbase	hsa-let-7f-5p	ADIPOR2	79602	PAR-CLIP	21572407
mirtarbase	hsa-let-7g-5p	ADIPOR2	79602	PAR-CLIP	21572407
mirtarbase	hsa-miR-26a-5p	ADM	133	CLASH	23622248
mirtarbase	hsa-miR-26a-5p	ADM	133	PAR-CLIP	20371350
mirtarbase	hsa-miR-26a-5p	ADM	133	PAR-CLIP	21572407
mirtarbase	hsa-miR-26a-5p	ADM	133	PAR-CLIP	22012620
mirtarbase	hsa-miR-26a-5p	ADM	133	PAR-CLIP	23446348
mirtarbase	hsa-miR-26a-5p	ADM	133	PAR-CLIP	23592263
mirtarbase	hsa-miR-26a-5p	ADM	133	PAR-CLIP	26701625
mirtarbase	hsa-miR-26b-5p	ADM	133	PAR-CLIP	21572407
mirtarbase	hsa-miR-26b-5p	ADM	133	PAR-CLIP	22012620
mirtarbase	hsa-miR-26b-5p	ADM	133	PAR-CLIP	23446348
mirtarbase	hsa-miR-26b-5p	ADM	133	PAR-CLIP	23592263
mirtarbase	hsa-miR-26b-5p	ADM	133	PAR-CLIP	26701625
mirtarbase	hsa-miR-26b-5p	ADM	133	Sequencing//PAR-CLIP	20371350
mirtarbase	hsa-miR-26a-5p	ADM2	79924	HITS-CLIP	23824327
mirtarbase	hsa-miR-26b-5p	ADM2	79924	HITS-CLIP	23824327
mirtarbase	hsa-miR-21-5p	ADNP	23394	Microarray	18591254
mirtarbase	hsa-miR-26b-5p	ADNP	23394	Microarray	19088304
mirtarbase	hsa-miR-30e-5p	ADO	84890	PAR-CLIP	20371350
mirtarbase	hsa-miR-7-5p	ADO	84890	Microarray	19073608
mirtarbase	hsa-miR-27a-3p	ADORA2B	136	PAR-CLIP	21572407
mirtarbase	hsa-miR-27b-3p	ADORA2B	136	PAR-CLIP	21572407
mirtarbase	hsa-miR-27b-3p	ADORA2B	136	qRT-PCR//Luciferase reporter assay	20388705
mirtarbase	hsa-miR-26b-5p	ADPGK	83440	Microarray	19088304
mirtarbase	hsa-miR-142-3p	ADPRHL1	113622	PAR-CLIP	23592263
mirtarbase	hsa-miR-30e-5p	ADPRHL1	113622	PAR-CLIP	23592263
mirtarbase	hsa-miR-26b-5p	ADRA2A	150	Microarray	19088304
mirtarbase	hsa-miR-26b-5p	AEN	64782	Microarray	19088304
mirtarbase	hsa-miR-26b-5p	AFAP1	60312	Microarray	19088304
mirtarbase	hsa-miR-142-3p	AFF1	4299	HITS-CLIP	19536157
mirtarbase	hsa-miR-142-3p	AFF1	4299	HITS-CLIP	22927820
mirtarbase	hsa-miR-142-3p	AFF1	4299	HITS-CLIP	23313552
mirtarbase	hsa-miR-142-3p	AFF1	4299	HITS-CLIP	23824327
mirtarbase	hsa-miR-142-3p	AFF1	4299	HITS-CLIP	27418678
mirtarbase	hsa-miR-142-3p	AFF1	4299	HITS-CLIP	28735896
mirtarbase	hsa-miR-142-3p	AFF1	4299	PAR-CLIP	23446348
mirtarbase	hsa-miR-142-3p	AFF4	27125	HITS-CLIP	22473208
mirtarbase	hsa-miR-181a-5p	AFF4	27125	HITS-CLIP	22473208
mirtarbase	hsa-miR-27a-3p	AFF4	27125	HITS-CLIP	22473208
mirtarbase	hsa-miR-27a-3p	AFF4	27125	Sequencing	20371350
mirtarbase	hsa-miR-27b-3p	AFF4	27125	HITS-CLIP	22473208
mirtarbase	hsa-miR-30e-5p	AFF4	27125	HITS-CLIP	22473208
mirtarbase	hsa-miR-181a-5p	AFTPH	54812	Sequencing	20371350
mirtarbase	hsa-miR-21-5p	AFTPH	54812	Microarray	18591254
mirtarbase	hsa-miR-1290	AGAP1	116987	PAR-CLIP	26701625
mirtarbase	hsa-miR-143-3p	AGAP1	116987	PAR-CLIP	26701625
mirtarbase	hsa-miR-221-3p	AGAP1	116987	Sequencing	20371350
mirtarbase	hsa-miR-142-3p	AGBL2	79841	Microarray	17612493
mirtarbase	hsa-miR-21-5p	AGGF1	55109	Microarray	18591254
mirtarbase	hsa-miR-7-5p	AGK	55750	Microarray	19073608
mirtarbase	hsa-miR-26b-5p	AGL	178	Microarray	19088304
mirtarbase	hsa-miR-26b-5p	AGMAT	79814	Microarray	19088304
mirtarbase	hsa-let-7f-5p	AGO1	26523	Immunohistochemistry//Immunoprecipitaion//Luciferase reporter assay//Northern blot//qRT-PCR//Western blot	23426184
mirtarbase	hsa-let-7g-5p	AGO1	26523	CLASH	23622248
mirtarbase	hsa-let-7g-5p	AGO1	26523	Immunohistochemistry//Immunoprecipitaion//Luciferase reporter assay//Northern blot//qRT-PCR//Western blot	23426184
mirtarbase	hsa-miR-26a-5p	AGO1	26523	CLASH	23622248
mirtarbase	hsa-miR-148a-3p	AGO2	27161	PAR-CLIP	21572407
mirtarbase	hsa-miR-148a-3p	AGO2	27161	PAR-CLIP	24398324
mirtarbase	hsa-miR-21-5p	AGO2	27161	PAR-CLIP	23446348
mirtarbase	hsa-miR-21-5p	AGO2	27161	PAR-CLIP	24398324
mirtarbase	hsa-miR-21-5p	AGO2	27161	Sequencing//PAR-CLIP	20371350
mirtarbase	hsa-miR-221-3p	AGO2	27161	PAR-CLIP	21572407
mirtarbase	hsa-miR-223-5p	AGO2	27161	PAR-CLIP	23592263
mirtarbase	hsa-miR-148a-3p	AGO3	192669	PAR-CLIP	21572407
mirtarbase	hsa-miR-21-5p	AGO4	192670	Microarray	18591254
mirtarbase	hsa-miR-7-5p	AGPAT1	10554	Microarray	19073608
mirtarbase	hsa-miR-26b-5p	AGPAT3	56894	Sequencing	20371350
mirtarbase	hsa-miR-27a-3p	AGPAT3	56894	HITS-CLIP	22473208
mirtarbase	hsa-miR-27b-3p	AGPAT3	56894	HITS-CLIP	22473208
mirtarbase	hsa-miR-26a-5p	AGPAT5	55326	PAR-CLIP	23592263
mirtarbase	hsa-miR-26b-5p	AGPAT5	55326	PAR-CLIP	23592263
mirtarbase	hsa-miR-26b-5p	AGT	183	Microarray	19088304
mirtarbase	hsa-miR-26a-5p	AGTPBP1	23287	HITS-CLIP	23824327
mirtarbase	hsa-miR-26a-5p	AGTPBP1	23287	PAR-CLIP	27292025
mirtarbase	hsa-miR-26b-5p	AGTPBP1	23287	HITS-CLIP	23824327
mirtarbase	hsa-miR-26b-5p	AGTPBP1	23287	PAR-CLIP	27292025
mirtarbase	hsa-miR-26b-5p	AGTR1	185	Microarray	19088304
mirtarbase	hsa-miR-142-3p	AGTR2	186	Microarray	17612493
mirtarbase	hsa-let-7f-5p	AHCYL2	23382	PAR-CLIP	23592263
mirtarbase	hsa-let-7g-5p	AHCYL2	23382	PAR-CLIP	23592263
mirtarbase	hsa-let-7f-5p	AHR	196	PAR-CLIP	23592263
mirtarbase	hsa-let-7g-5p	AHR	196	PAR-CLIP	23592263
mirtarbase	hsa-miR-181a-5p	AHR	196	qRT-PCR//Western blot	24329418
mirtarbase	hsa-miR-26a-5p	AHR	196	CLASH	23622248
mirtarbase	hsa-miR-26a-5p	AHRR	57491	CLASH	23622248
mirtarbase	hsa-miR-21-5p	AHSA2	130872	Microarray	18591254
mirtarbase	hsa-miR-26b-5p	AIFM1	9131	Microarray	19088304
mirtarbase	hsa-miR-142-5p	AIMP1	9255	PAR-CLIP	21572407
mirtarbase	hsa-miR-223-5p	AIMP1	9255	PAR-CLIP	21572407
mirtarbase	hsa-miR-143-3p	AIRE	326	HITS-CLIP	28735896
mirtarbase	hsa-let-7f-5p	AK4	205	PAR-CLIP	20371350
mirtarbase	hsa-let-7f-5p	AK4	205	PAR-CLIP	23446348
mirtarbase	hsa-let-7g-5p	AK4	205	PAR-CLIP	20371350
mirtarbase	hsa-let-7g-5p	AK4	205	PAR-CLIP	23446348
mirtarbase	hsa-miR-142-3p	AK4	205	PAR-CLIP	20371350
mirtarbase	hsa-miR-26b-5p	AK4	205	Microarray	19088304
mirtarbase	hsa-miR-7-5p	AKAP1	8165	PAR-CLIP	22100165
mirtarbase	hsa-let-7g-5p	AKAP11	11215	CLASH	23622248
mirtarbase	hsa-miR-142-5p	AKAP11	11215	PAR-CLIP	20371350
mirtarbase	hsa-miR-142-5p	AKAP11	11215	PAR-CLIP	22012620
mirtarbase	hsa-miR-142-5p	AKAP11	11215	PAR-CLIP	23446348
mirtarbase	hsa-miR-142-5p	AKAP11	11215	PAR-CLIP	23592263
mirtarbase	hsa-miR-142-5p	AKAP11	11215	PAR-CLIP	24398324
mirtarbase	hsa-miR-142-5p	AKAP11	11215	PAR-CLIP	26701625
mirtarbase	hsa-miR-142-5p	AKAP11	11215	PAR-CLIP//HITS-CLIP	21572407
mirtarbase	hsa-miR-7-5p	AKAP11	11215	PAR-CLIP	21572407
mirtarbase	hsa-miR-181a-5p	AKAP12	9590	CLASH	23622248
mirtarbase	hsa-miR-148a-3p	AKAP17A	8227	PAR-CLIP	22012620
mirtarbase	hsa-miR-223-5p	AKAP2	11217	PAR-CLIP	20371350
mirtarbase	hsa-miR-223-5p	AKAP2	11217	PAR-CLIP	23446348
mirtarbase	hsa-miR-223-5p	AKAP2	11217	PAR-CLIP//HITS-CLIP	21572407
mirtarbase	hsa-miR-26b-5p	AKAP5	9495	Microarray	19088304
mirtarbase	hsa-let-7f-5p	AKAP8	10270	PAR-CLIP	20371350
mirtarbase	hsa-let-7f-5p	AKAP8	10270	PAR-CLIP	21572407
mirtarbase	hsa-let-7g-5p	AKAP8	10270	PAR-CLIP	20371350
mirtarbase	hsa-let-7g-5p	AKAP8	10270	PAR-CLIP	21572407
mirtarbase	hsa-miR-21-5p	AKAP9	10142	Microarray	19242418
mirtarbase	hsa-miR-26a-5p	AKIRIN1	79647	HITS-CLIP	23824327
mirtarbase	hsa-miR-26b-5p	AKIRIN1	79647	HITS-CLIP	23824327
mirtarbase	hsa-miR-27a-3p	AKIRIN1	79647	PAR-CLIP	20371350
mirtarbase	hsa-miR-27a-3p	AKIRIN1	79647	PAR-CLIP	21572407
mirtarbase	hsa-miR-27a-3p	AKIRIN1	79647	PAR-CLIP	23592263
mirtarbase	hsa-miR-27a-3p	AKIRIN1	79647	PAR-CLIP	24398324
mirtarbase	hsa-miR-27b-3p	AKIRIN1	79647	PAR-CLIP	20371350
mirtarbase	hsa-miR-27b-3p	AKIRIN1	79647	PAR-CLIP	21572407
mirtarbase	hsa-miR-27b-3p	AKIRIN1	79647	PAR-CLIP	23592263
mirtarbase	hsa-miR-27b-3p	AKIRIN1	79647	PAR-CLIP	24398324
mirtarbase	hsa-miR-30e-5p	AKIRIN1	79647	PAR-CLIP	21572407
mirtarbase	hsa-miR-30e-5p	AKIRIN1	79647	PAR-CLIP	23592263
mirtarbase	hsa-miR-142-3p	AKIRIN2	55122	PAR-CLIP	21572407
mirtarbase	hsa-miR-142-3p	AKR1B10	57016	PAR-CLIP	22291592
mirtarbase	hsa-miR-1290	AKR7A2	8574	PAR-CLIP	20371350
mirtarbase	hsa-miR-143-3p	AKR7A2	8574	HITS-CLIP	27418678
mirtarbase	hsa-miR-7-5p	AKR7A2	8574	Microarray	19073608
mirtarbase	hsa-miR-143-3p	AKT1	207	Luciferase reporter assay//qRT-PCR//Western blot	23104321
mirtarbase	hsa-miR-22-3p	AKT1	207	Luciferase reporter assay//Western blot	26364720
mirtarbase	hsa-miR-26b-5p	AKT1	207	Microarray	19088304
mirtarbase	hsa-miR-142-3p	AKT1S1	84335	HITS-CLIP	22473208
mirtarbase	hsa-let-7g-5p	AKT2	208	Luciferase reporter assay//qRT-PCR//Western blot	25288334
mirtarbase	hsa-miR-143-3p	AKT2	208	Luciferase reporter assay//Microarray//qRT-PCR//Western blot	28404925
mirtarbase	hsa-miR-203a-3p	AKT2	208	Northern blot//qRT-PCR//Western blot	21354697
mirtarbase	hsa-miR-21-5p	AKT2	208	Western blot;Other	20048743
mirtarbase	hsa-miR-221-3p	AKT3	10000	PAR-CLIP	20371350
mirtarbase	hsa-miR-223-5p	AKT3	10000	PAR-CLIP	21572407
mirtarbase	hsa-miR-223-5p	AKT3	10000	PAR-CLIP	23592263
mirtarbase	hsa-miR-7-5p	AKT3	10000	PAR-CLIP	20371350
mirtarbase	hsa-miR-142-3p	ALAD	210	Microarray	17612493
mirtarbase	hsa-miR-148a-3p	ALCAM	214	Luciferase reporter assay//qRT-PCR//Western blot	28063929
mirtarbase	hsa-miR-181a-5p	ALDH1A1	216	qRT-PCR	26693182
mirtarbase	hsa-miR-7-5p	ALDH1A3	220	Microarray	17612493
mirtarbase	hsa-miR-7-5p	ALDH3A2	224	Microarray	19073608
mirtarbase	hsa-miR-7-5p	ALDH3B2	222	Microarray	17612493
mirtarbase	hsa-miR-26a-5p	ALDH6A1	4329	HITS-CLIP	23824327
mirtarbase	hsa-miR-26b-5p	ALDH6A1	4329	HITS-CLIP	23824327
mirtarbase	hsa-let-7f-5p	ALDH7A1	501	CLASH	23622248
mirtarbase	hsa-miR-181a-5p	ALDH9A1	223	HITS-CLIP	22473208
mirtarbase	hsa-miR-27a-3p	ALDH9A1	223	Sequencing	20371350
mirtarbase	hsa-miR-27a-3p	ALDOA	226	PAR-CLIP	20371350
mirtarbase	hsa-miR-27b-3p	ALDOA	226	PAR-CLIP	20371350
mirtarbase	hsa-miR-223-5p	ALG1	56052	PAR-CLIP	21572407
mirtarbase	hsa-miR-26a-5p	ALG1	56052	PAR-CLIP	21572407
mirtarbase	hsa-miR-26b-5p	ALG1	56052	PAR-CLIP	21572407
mirtarbase	hsa-miR-26a-5p	ALG10B	144245	CLASH	23622248
mirtarbase	hsa-miR-7-5p	ALG14	199857	PAR-CLIP	20371350
mirtarbase	hsa-miR-26b-5p	ALG3	10195	Microarray	19088304
mirtarbase	hsa-miR-7-5p	ALG3	10195	Microarray	19073608
mirtarbase	hsa-miR-142-5p	ALG9	79796	PAR-CLIP	23592263
mirtarbase	hsa-miR-26b-5p	ALG9	79796	Microarray	19088304
mirtarbase	hsa-miR-27a-3p	ALG9	79796	PAR-CLIP	23592263
mirtarbase	hsa-miR-27b-3p	ALG9	79796	PAR-CLIP	23592263
mirtarbase	hsa-miR-30e-5p	ALG9	79796	PAR-CLIP	23592263
mirtarbase	hsa-miR-7-5p	ALG9	79796	PAR-CLIP	23592263
mirtarbase	hsa-miR-26b-5p	ALKBH4	54784	Microarray	19088304
mirtarbase	hsa-miR-21-5p	ALMS1	7840	Microarray	18591254
mirtarbase	hsa-miR-22-3p	ALMS1	7840	CLASH	23622248
mirtarbase	hsa-miR-203a-3p	ALOX15	246	Microarray//qRT-PCR	22815788
mirtarbase	hsa-miR-26b-5p	ALPI	248	Microarray	19088304
mirtarbase	hsa-miR-26b-5p	ALPK3	57538	Microarray	19088304
mirecords	hsa-miR-26b-5p	ALS2CR2			20831567
mirtarbase	hsa-miR-26b-5p	ALX1	8092	Microarray	19088304
mirtarbase	hsa-miR-26a-5p	AMACR	23600	Luciferase reporter assay//qRT-PCR//Western blot	24517338
mirtarbase	hsa-let-7f-5p	AMD1	262	HITS-CLIP	23313552
mirtarbase	hsa-let-7g-5p	AMD1	262	HITS-CLIP	23313552
mirtarbase	hsa-miR-223-5p	AMD1	262	PAR-CLIP	21572407
mirtarbase	hsa-miR-223-5p	AMD1	262	PAR-CLIP	23446348
mirtarbase	hsa-miR-26b-5p	AMDHD2	51005	Microarray	19088304
mirtarbase	hsa-miR-148a-3p	AMELX	265	CLASH	23622248
mirtarbase	hsa-miR-223-5p	AMER1	139285	HITS-CLIP	23313552
mirtarbase	hsa-miR-223-5p	AMER1	139285	HITS-CLIP	27418678
mirtarbase	hsa-miR-223-5p	AMER1	139285	PAR-CLIP//HITS-CLIP	21572407
mirtarbase	hsa-miR-181a-5p	AMMECR1	9949	Microarray	17612493
mirtarbase	hsa-miR-221-3p	AMMECR1L	83607	CLASH	23622248
mirtarbase	hsa-miR-221-3p	AMOT	154796	CLASH	23622248
mirtarbase	hsa-miR-27a-3p	AMOTL2	51421	Sequencing	20371350
mirtarbase	hsa-miR-26b-5p	ANAPC1	64682	Microarray	19088304
mirtarbase	hsa-miR-26b-5p	ANAPC13	25847	Microarray	19088304
mirtarbase	hsa-miR-223-5p	ANG	283	PAR-CLIP	23446348
mirtarbase	hsa-miR-223-5p	ANG	283	PAR-CLIP//HITS-CLIP	21572407
mirtarbase	hsa-miR-7-5p	ANGPTL3	27329	PAR-CLIP	20371350
mirtarbase	hsa-miR-30e-5p	ANKRA2	57763	HITS-CLIP	22473208
mirtarbase	hsa-miR-181a-5p	ANKRD1	27063	Microarray	17612493
mirtarbase	hsa-miR-203a-3p	ANKRD13B	124930	PAR-CLIP	20371350
mirtarbase	hsa-miR-203a-3p	ANKRD13B	124930	PAR-CLIP	23592263
mirtarbase	hsa-miR-203a-3p	ANKRD13B	124930	PAR-CLIP	26701625
mirtarbase	hsa-miR-181a-5p	ANKRD13C	81573	Microarray	17612493
mirtarbase	hsa-miR-27b-3p	ANKRD2	26287	CLASH	23622248
mirtarbase	hsa-miR-142-5p	ANKRD28	23243	PAR-CLIP	22012620
mirtarbase	hsa-miR-21-5p	ANKRD28	23243	Microarray	18591254
mirtarbase	hsa-miR-221-3p	ANKRD28	23243	CLASH	23622248
mirtarbase	hsa-miR-7-5p	ANKRD31	256006	Microarray	17612493
mirtarbase	hsa-miR-142-5p	ANKRD33B	651746	PAR-CLIP	20371350
mirtarbase	hsa-miR-142-5p	ANKRD33B	651746	PAR-CLIP	21572407
mirtarbase	hsa-miR-142-5p	ANKRD33B	651746	PAR-CLIP	22012620
mirtarbase	hsa-miR-142-5p	ANKRD33B	651746	PAR-CLIP	23446348
mirtarbase	hsa-miR-142-5p	ANKRD33B	651746	PAR-CLIP	23592263
mirtarbase	hsa-miR-7-5p	ANKRD36	375248	PAR-CLIP	20371350
mirtarbase	hsa-miR-26b-5p	ANKRD36B	57730	Microarray	19088304
mirtarbase	hsa-miR-26b-5p	ANKRD36BP1	84832	Microarray	19088304
mirtarbase	hsa-miR-27a-3p	ANKRD40	91369	PAR-CLIP	23592263
mirtarbase	hsa-miR-27a-3p	ANKRD40	91369	PAR-CLIP	26701625
mirtarbase	hsa-miR-27b-3p	ANKRD40	91369	PAR-CLIP	23592263
mirtarbase	hsa-miR-27b-3p	ANKRD40	91369	PAR-CLIP	26701625
mirtarbase	hsa-miR-26b-5p	ANKRD40CL	55018	Microarray	19088304
mirtarbase	hsa-let-7f-5p	ANKRD46	157567	PAR-CLIP	22100165
mirtarbase	hsa-let-7f-5p	ANKRD46	157567	PAR-CLIP	26701625
mirtarbase	hsa-let-7g-5p	ANKRD46	157567	PAR-CLIP	22100165
mirtarbase	hsa-let-7g-5p	ANKRD46	157567	PAR-CLIP	26701625
mirtarbase	hsa-miR-21-5p	ANKRD46	157567	Immunoblot//Immunohistochemistry//Luciferase reporter assay//Microarray//qRT-PCR//Western blot	21219636
mirtarbase	hsa-miR-26b-5p	ANKRD46	157567	Microarray	19088304
mirtarbase	hsa-miR-26a-5p	ANKRD52	283373	HITS-CLIP	22473208
mirtarbase	hsa-miR-26b-5p	ANKRD52	283373	HITS-CLIP	22473208
mirtarbase	hsa-miR-27b-3p	ANKRD52	283373	CLASH	23622248
mirtarbase	hsa-miR-143-3p	ANKRD9	122416	HITS-CLIP	23824327
mirtarbase	hsa-miR-143-3p	ANKS4B	257629	HITS-CLIP	27418678
mirtarbase	hsa-miR-26b-5p	ANO2	57101	Microarray	19088304
mirtarbase	hsa-miR-26a-5p	ANO3	63982	CLASH	23622248
mirtarbase	hsa-miR-1290	ANO8	57719	HITS-CLIP	27418678
mirtarbase	hsa-miR-148a-3p	ANP32A	8125	Sequencing	20371350
mirtarbase	hsa-miR-203a-3p	ANP32A	8125	PAR-CLIP	20371350
mirtarbase	hsa-miR-21-5p	ANP32A	8125	Luciferase reporter assay//qRT-PCR//Western blot	21317927
mirtarbase	hsa-let-7f-5p	ANP32C	23520	CLASH	23622248
mirtarbase	hsa-miR-221-3p	ANXA1	301	Luciferase reporter assay//QRTPCR//Western blot	23630541
mirtarbase	hsa-miR-26b-5p	ANXA1	301	Microarray	19088304
mirtarbase	hsa-miR-7-5p	ANXA11	311	Microarray	19073608
mirtarbase	hsa-miR-26b-5p	ANXA3	306	Microarray	19088304
mirtarbase	hsa-miR-26b-5p	ANXA5	308	Microarray	19088304
mirtarbase	hsa-miR-26b-5p	ANXA8	653145	Microarray	19088304
mirtarbase	hsa-miR-26b-5p	ANXA8L1	728113	Microarray	19088304
mirtarbase	hsa-miR-26b-5p	AOX1	316	Microarray	19088304
mirtarbase	hsa-miR-21-5p	AP1AR	55435	HITS-CLIP	22473208
mirtarbase	hsa-miR-27a-3p	AP1G1	164	PAR-CLIP	21572407
mirtarbase	hsa-miR-27a-3p	AP1G1	164	PAR-CLIP	22012620
mirtarbase	hsa-miR-27a-3p	AP1G1	164	PAR-CLIP	23592263
mirtarbase	hsa-miR-27a-3p	AP1G1	164	PAR-CLIP	24398324
mirtarbase	hsa-miR-27b-3p	AP1G1	164	PAR-CLIP	21572407
mirtarbase	hsa-miR-27b-3p	AP1G1	164	PAR-CLIP	22012620
mirtarbase	hsa-miR-27b-3p	AP1G1	164	PAR-CLIP	23592263
mirtarbase	hsa-miR-27b-3p	AP1G1	164	PAR-CLIP	24398324
mirtarbase	hsa-miR-181a-5p	AP1M1	8907	CLASH	23622248
mirtarbase	hsa-miR-7-5p	AP1M1	8907	Microarray	19073608
mirtarbase	hsa-miR-7-5p	AP1M1	8907	Sequencing	20371350
mirtarbase	hsa-let-7f-5p	AP1S1	1174	PAR-CLIP	23592263
mirtarbase	hsa-let-7f-5p	AP1S1	1174	PAR-CLIP	26701625
mirtarbase	hsa-let-7g-5p	AP1S1	1174	PAR-CLIP	23592263
mirtarbase	hsa-let-7g-5p	AP1S1	1174	PAR-CLIP	26701625
mirtarbase	hsa-miR-26a-5p	AP1S3	130340	HITS-CLIP	22473208
mirtarbase	hsa-miR-26b-5p	AP1S3	130340	HITS-CLIP	22473208
mirtarbase	hsa-miR-221-3p	AP2A1	160	CLASH	23622248
mirtarbase	hsa-miR-221-3p	AP3B1	8546	CLASH	23622248
mirtarbase	hsa-miR-27a-3p	AP3B2	8120	PAR-CLIP	20371350
mirtarbase	hsa-miR-27a-3p	AP3B2	8120	PAR-CLIP	23446348
mirtarbase	hsa-miR-27a-3p	AP3B2	8120	PAR-CLIP	24398324
mirtarbase	hsa-miR-27b-3p	AP3B2	8120	PAR-CLIP	20371350
mirtarbase	hsa-miR-27b-3p	AP3B2	8120	PAR-CLIP	23446348
mirtarbase	hsa-miR-27b-3p	AP3B2	8120	PAR-CLIP	24398324
mirtarbase	hsa-miR-27a-3p	AP3D1	8943	PAR-CLIP	23592263
mirtarbase	hsa-miR-27b-3p	AP3D1	8943	PAR-CLIP	23592263
mirtarbase	hsa-miR-21-5p	AP3M1	26985	Microarray	18591254
mirtarbase	hsa-miR-7-5p	AP3M1	26985	Microarray	19073608
mirtarbase	hsa-miR-181a-5p	AP3M2	10947	HITS-CLIP	23824327
mirtarbase	hsa-miR-26b-5p	AP3M2	10947	Microarray	19088304
mirtarbase	hsa-miR-148a-3p	AP5B1	91056	HITS-CLIP	23824327
mirtarbase	hsa-miR-181a-5p	AP5M1	55745	HITS-CLIP	19536157
mirtarbase	hsa-miR-181a-5p	AP5M1	55745	HITS-CLIP	23824327
mirecords	hsa-miR-21-5p	APAF1	317		17991735
mirecords	hsa-miR-21-5p	APAF1	317		18829576
mirtarbase	hsa-miR-21-5p	APAF1	317	Luciferase reporter assay//qRT-PCR//Western blot	18829576
mirtarbase	hsa-miR-21-5p	APAF1	317	Luciferase reporter assay//qRT-PCR//Western blot	27021436
mirtarbase	hsa-miR-21-5p	APAF1	317	Microarray	18591254
mirtarbase	hsa-miR-221-3p	APAF1	317	Luciferase reporter assay//QRTPCR//Western blot	23630541
mirtarbase	hsa-miR-221-3p	APAF1	317	Western blot//Immunohistochemistry//Luciferase reporter assay	25586265
mirtarbase	hsa-miR-26b-5p	APBB2	323	Microarray	19088304
mirtarbase	hsa-miR-27a-3p	APBB2	323	CLASH	23622248
mirtarbase	hsa-miR-142-3p	APC	324	HITS-CLIP	22473208
mirtarbase	hsa-miR-142-3p	APC	324	Luciferase reporter assay	23229013
mirtarbase	hsa-miR-148a-3p	APC	324	CLASH	23622248
mirtarbase	hsa-miR-21-5p	APC	324	Microarray	18591254
mirtarbase	hsa-miR-27a-3p	APC	324	Luciferase reporter assay//Western blot	22018270
mirtarbase	hsa-miR-27a-3p	APC	324	Luciferase reporter assay//qRT-PCR//Western blot	24487055
mirtarbase	hsa-miR-27a-3p	APEX1	328	HITS-CLIP	22473208
mirtarbase	hsa-miR-27a-3p	APEX1	328	PAR-CLIP	20371350
mirtarbase	hsa-miR-27a-3p	APEX1	328	PAR-CLIP	23592263
mirtarbase	hsa-miR-27b-3p	APEX1	328	HITS-CLIP	22473208
mirtarbase	hsa-miR-27b-3p	APEX1	328	PAR-CLIP	20371350
mirtarbase	hsa-miR-27b-3p	APEX1	328	PAR-CLIP	23592263
mirtarbase	hsa-miR-148a-3p	APLN	8862	HITS-CLIP	28735896
mirtarbase	hsa-miR-148a-3p	APLP2	334	PAR-CLIP	26701625
mirtarbase	hsa-miR-30e-5p	APLP2	334	HITS-CLIP	23313552
mirtarbase	hsa-miR-7-5p	APLP2	334	Microarray	17612493
mirtarbase	hsa-miR-7-5p	APLP2	334	Microarray	19073608
mirtarbase	hsa-miR-26b-5p	APOF	319	Microarray	19088304
mirtarbase	hsa-miR-221-3p	APOL2	23780	Sequencing	20371350
mirtarbase	hsa-miR-142-5p	APOL6	80830	HITS-CLIP	23824327
mirtarbase	hsa-miR-143-3p	APOL6	80830	HITS-CLIP	27418678
mirtarbase	hsa-miR-181a-5p	APOL6	80830	HITS-CLIP	22473208
mirtarbase	hsa-miR-223-5p	APOL6	80830	HITS-CLIP	23313552
mirtarbase	hsa-miR-223-5p	APOL6	80830	PAR-CLIP	21572407
mirtarbase	hsa-miR-21-5p	APOLD1	81575	Microarray	18591254
mirtarbase	hsa-miR-26b-5p	APOO	79135	Microarray	19088304
mirtarbase	hsa-miR-148a-3p	APPBP2	10513	CLASH	23622248
mirtarbase	hsa-miR-27a-3p	APPBP2	10513	PAR-CLIP	22012620
mirtarbase	hsa-miR-27a-3p	APPBP2	10513	PAR-CLIP	23592263
mirtarbase	hsa-miR-27a-3p	APPBP2	10513	PAR-CLIP	24398324
mirtarbase	hsa-miR-27a-3p	APPBP2	10513	PAR-CLIP	26701625
mirtarbase	hsa-miR-27b-3p	APPBP2	10513	PAR-CLIP	22012620
mirtarbase	hsa-miR-27b-3p	APPBP2	10513	PAR-CLIP	23592263
mirtarbase	hsa-miR-27b-3p	APPBP2	10513	PAR-CLIP	24398324
mirtarbase	hsa-miR-27b-3p	APPBP2	10513	PAR-CLIP	26701625
mirtarbase	hsa-miR-21-5p	APPL1	26060	HITS-CLIP	22473208
mirtarbase	hsa-miR-21-5p	APPL1	26060	Microarray	18591254
mirtarbase	hsa-let-7f-5p	AQP6	363	PAR-CLIP	27292025
mirtarbase	hsa-let-7g-5p	AQP6	363	PAR-CLIP	27292025
mirtarbase	hsa-miR-26a-5p	AQR	9716	HITS-CLIP	23824327
mirtarbase	hsa-miR-26b-5p	AQR	9716	HITS-CLIP	23824327
mirtarbase	hsa-miR-223-5p	AR	367	PAR-CLIP	21572407
mirtarbase	hsa-miR-26b-5p	ARAP2	116984	Microarray	19088304
mirtarbase	hsa-miR-26a-5p	ARCN1	372	CLASH	23622248
mirtarbase	hsa-let-7f-5p	AREL1	9870	PAR-CLIP	23592263
mirtarbase	hsa-let-7g-5p	AREL1	9870	PAR-CLIP	23592263
mirtarbase	hsa-miR-26a-5p	ARF1	375	PAR-CLIP	20371350
mirtarbase	hsa-miR-26b-5p	ARF1	375	PAR-CLIP	20371350
mirtarbase	hsa-miR-142-3p	ARF4	378	Microarray	17612493
mirtarbase	hsa-miR-221-3p	ARF4	378	Luciferase reporter assay	28057486
mirtarbase	hsa-miR-221-3p	ARF4	378	Luciferase reporter assay//qRT-PCR//Western blot	28025995
mirtarbase	hsa-miR-7-5p	ARF4	378	Microarray//Microarray;Other	19073608
mirtarbase	hsa-miR-181a-5p	ARF6	382	Microarray	17612493
mirtarbase	hsa-miR-181a-5p	ARF6	382	PAR-CLIP	21572407
mirtarbase	hsa-miR-26b-5p	ARFIP2	23647	Microarray	19088304
mirtarbase	hsa-miR-26b-5p	ARFRP1	10139	Microarray	19088304
mirtarbase	hsa-miR-7-5p	ARG1	383	Microarray	17612493
mirtarbase	hsa-miR-142-3p	ARHGAP12	94134	Microarray	17612493
mirtarbase	hsa-miR-181a-5p	ARHGAP12	94134	Sequencing	20371350
mirtarbase	hsa-miR-21-5p	ARHGAP21	57584	Microarray	18591254
mirtarbase	hsa-miR-221-3p	ARHGAP42	143872	CLASH	23622248
mirtarbase	hsa-miR-221-3p	ARHGAP42	143872	PAR-CLIP	21572407
mirtarbase	hsa-miR-221-3p	ARHGAP42	143872	PAR-CLIP	23446348
mirtarbase	hsa-miR-221-3p	ARHGAP42	143872	PAR-CLIP	26701625
mirtarbase	hsa-miR-26b-5p	ARHGAP44	9912	Microarray	19088304
mirtarbase	hsa-miR-26a-5p	ARHGEF1	9138	CLASH	23622248
mirtarbase	hsa-miR-21-5p	ARHGEF12	23365	Microarray	18591254
mirtarbase	hsa-miR-7-5p	ARHGEF12	23365	HITS-CLIP	23313552
mirtarbase	hsa-miR-221-3p	ARHGEF18	23370	CLASH	23622248
mirtarbase	hsa-miR-22-3p	ARHGEF26	26084	PAR-CLIP	27292025
mirtarbase	hsa-miR-203a-3p	ARHGEF28	64283	PAR-CLIP	22100165
mirtarbase	hsa-miR-26a-5p	ARHGEF39	84904	HITS-CLIP	23824327
mirtarbase	hsa-miR-26b-5p	ARHGEF39	84904	HITS-CLIP	23824327
mirtarbase	hsa-miR-26b-5p	ARHGEF5	7984	Microarray	19088304
mirtarbase	hsa-miR-223-5p	ARHGEF9	23229	HITS-CLIP	27418678
mirtarbase	hsa-miR-203a-3p	ARID1A	8289	PAR-CLIP	20371350
mirtarbase	hsa-miR-221-3p	ARID1A	8289	Sequencing	20371350
mirtarbase	hsa-miR-203a-3p	ARID2	196528	PAR-CLIP	23592263
mirtarbase	hsa-let-7f-5p	ARID3A	1820	PAR-CLIP	23592263
mirtarbase	hsa-let-7g-5p	ARID3A	1820	PAR-CLIP	23592263
mirtarbase	hsa-miR-148a-3p	ARID3A	1820	PAR-CLIP	23592263
mirtarbase	hsa-miR-30e-5p	ARID3A	1820	HITS-CLIP	22473208
mirtarbase	hsa-miR-30e-5p	ARID3A	1820	PAR-CLIP	23592263
mirtarbase	hsa-let-7f-5p	ARID3B	10620	CLASH	23622248
mirtarbase	hsa-let-7f-5p	ARID3B	10620	PAR-CLIP	20371350
mirtarbase	hsa-let-7f-5p	ARID3B	10620	PAR-CLIP	21572407
mirtarbase	hsa-let-7f-5p	ARID3B	10620	PAR-CLIP	23446348
mirtarbase	hsa-let-7g-5p	ARID3B	10620	PAR-CLIP	20371350
mirtarbase	hsa-let-7g-5p	ARID3B	10620	PAR-CLIP	21572407
mirtarbase	hsa-let-7g-5p	ARID3B	10620	PAR-CLIP	23446348
mirtarbase	hsa-miR-203a-3p	ARID3B	10620	PAR-CLIP	20371350
mirtarbase	hsa-miR-203a-3p	ARID3B	10620	PAR-CLIP	21572407
mirtarbase	hsa-miR-203a-3p	ARID3B	10620	PAR-CLIP	23446348
mirtarbase	hsa-miR-26b-5p	ARID3B	10620	Microarray	19088304
mirtarbase	hsa-miR-21-5p	ARID4A	5926	Microarray	18591254
mirtarbase	hsa-miR-22-3p	ARID5B	84159	Sequencing	20371350
mirtarbase	hsa-let-7f-5p	ARIH1	25820	PAR-CLIP	21572407
mirtarbase	hsa-let-7g-5p	ARIH1	25820	PAR-CLIP	21572407
mirtarbase	hsa-miR-221-3p	ARIH2	10425	Reporter assay;Microarray	20018759
mirtarbase	hsa-miR-142-3p	ARL10	285598	Microarray	17612493
mirtarbase	hsa-miR-142-3p	ARL14EP	120534	Microarray	17612493
mirtarbase	hsa-miR-142-3p	ARL15	54622	Microarray	17612493
mirtarbase	hsa-miR-142-3p	ARL15	54622	PAR-CLIP	22100165
mirtarbase	hsa-miR-7-5p	ARL15	54622	Sequencing	20371350
mirtarbase	hsa-miR-26b-5p	ARL17A	51326	Microarray	19088304
mirtarbase	hsa-miR-26b-5p	ARL17B	51326	Microarray	19088304
mirtarbase	hsa-miR-1290	ARL2BP	23568	HITS-CLIP	23313552
mirtarbase	hsa-miR-26b-5p	ARL4A	10124	Microarray	19088304
mirtarbase	hsa-miR-26a-5p	ARL4C	10123	Immunoblot//Luciferase reporter assay//qRT-PCR	22673513
mirtarbase	hsa-miR-26b-5p	ARL4C	10123	Immunoblot//Luciferase reporter assay//qRT-PCR	22673513
mirtarbase	hsa-miR-27a-3p	ARL4C	10123	Sequencing	20371350
mirtarbase	hsa-miR-26b-5p	ARL5A	26225	Microarray	19088304
mirtarbase	hsa-miR-142-3p	ARL5B	221079	PAR-CLIP	23592263
mirtarbase	hsa-miR-27a-3p	ARL5B	221079	PAR-CLIP	20371350
mirtarbase	hsa-miR-27a-3p	ARL5B	221079	PAR-CLIP	21572407
mirtarbase	hsa-miR-27a-3p	ARL5B	221079	PAR-CLIP	24398324
mirtarbase	hsa-miR-27b-3p	ARL5B	221079	PAR-CLIP	20371350
mirtarbase	hsa-miR-27b-3p	ARL5B	221079	PAR-CLIP	21572407
mirtarbase	hsa-miR-27b-3p	ARL5B	221079	PAR-CLIP	24398324
mirtarbase	hsa-let-7f-5p	ARL6IP1	23204	CLASH	23622248
mirtarbase	hsa-miR-148a-3p	ARL6IP1	23204	PAR-CLIP	27292025
mirtarbase	hsa-miR-221-3p	ARL6IP1	23204	PAR-CLIP	23592263
mirtarbase	hsa-miR-27a-3p	ARL6IP1	23204	PAR-CLIP	21572407
mirtarbase	hsa-miR-27a-3p	ARL6IP1	23204	PAR-CLIP	23592263
mirtarbase	hsa-miR-27a-3p	ARL6IP1	23204	PAR-CLIP	24398324
mirtarbase	hsa-miR-27a-3p	ARL6IP1	23204	Sequencing//PAR-CLIP	20371350
mirtarbase	hsa-miR-27b-3p	ARL6IP1	23204	PAR-CLIP	20371350
mirtarbase	hsa-miR-27b-3p	ARL6IP1	23204	PAR-CLIP	21572407
mirtarbase	hsa-miR-27b-3p	ARL6IP1	23204	PAR-CLIP	23592263
mirtarbase	hsa-miR-27b-3p	ARL6IP1	23204	PAR-CLIP	24398324
mirtarbase	hsa-miR-142-3p	ARL6IP6	151188	Microarray	17612493
mirtarbase	hsa-miR-181a-5p	ARL6IP6	151188	Microarray	17612493
mirtarbase	hsa-let-7f-5p	ARL8B	55207	HITS-CLIP	23706177
mirtarbase	hsa-let-7g-5p	ARL8B	55207	HITS-CLIP	23706177
mirtarbase	hsa-miR-148a-3p	ARL8B	55207	PAR-CLIP	23592263
mirtarbase	hsa-miR-26b-5p	ARL8B	55207	Microarray	19088304
mirtarbase	hsa-miR-26b-5p	ARMC1	55156	Microarray	19088304
mirtarbase	hsa-miR-7-5p	ARMC10	83787	Microarray	19073608
mirtarbase	hsa-miR-7-5p	ARMC10	83787	PAR-CLIP	20371350
mirtarbase	hsa-miR-26b-5p	ARMC7	79637	Microarray	19088304
mirtarbase	hsa-let-7f-5p	ARMC8	25852	CLASH	23622248
mirtarbase	hsa-miR-26b-5p	ARMC8	25852	Microarray	19088304
mirtarbase	hsa-miR-26b-5p	ARMCX2	9823	Microarray	19088304
mirtarbase	hsa-miR-21-5p	ARMCX3	51566	Microarray	18591254
mirtarbase	hsa-miR-7-5p	ARMCX6	54470	PAR-CLIP	23592263
mirtarbase	hsa-miR-26a-5p	ARMH4	145407	CLASH	23622248
mirtarbase	hsa-miR-26a-5p	ARMH4	145407	PAR-CLIP	22100165
mirtarbase	hsa-miR-26b-5p	ARMH4	145407	PAR-CLIP	22100165
mirtarbase	hsa-miR-221-3p	ARNT	405	qRT-PCR//Western blot	24329418
mirtarbase	hsa-miR-26b-5p	ARNT2	9915	Microarray	19088304
mirtarbase	hsa-miR-142-3p	ARNTL	406	Luciferase reporter assay	22958478
mirtarbase	hsa-miR-142-3p	ARNTL	406	Luciferase reporter assay//QRTPCR//Western blot	24928439
mirtarbase	hsa-miR-142-3p	ARNTL	406	Luciferase reporter assay//qRT-PCR	21799909
mirtarbase	hsa-miR-142-3p	ARNTL	406	Microarray	17612493
mirtarbase	hsa-miR-142-3p	ARNTL	406	PAR-CLIP	23592263
mirtarbase	hsa-miR-27a-3p	ARNTL	406	PAR-CLIP	21572407
mirtarbase	hsa-miR-27a-3p	ARNTL	406	PAR-CLIP	22012620
mirtarbase	hsa-miR-27b-3p	ARNTL	406	PAR-CLIP	21572407
mirtarbase	hsa-miR-27b-3p	ARNTL	406	PAR-CLIP	22012620
mirtarbase	hsa-miR-26a-5p	ARNTL2	56938	PAR-CLIP	20371350
mirtarbase	hsa-miR-26b-5p	ARNTL2	56938	PAR-CLIP	20371350
mirtarbase	hsa-miR-22-3p	ARPC5	10092	Immunohistochemistry//Luciferase reporter assay//qRT-PCR//Western blot//EMSA//Microarray	22447776
mirtarbase	hsa-miR-26b-5p	ARPC5	10092	Microarray	19088304
mirtarbase	hsa-miR-203a-3p	ARPP19	10776	PAR-CLIP	20371350
mirtarbase	hsa-miR-26a-5p	ARPP19	10776	HITS-CLIP	22473208
mirtarbase	hsa-miR-26b-5p	ARPP19	10776	HITS-CLIP	22473208
mirtarbase	hsa-miR-30e-5p	ARPP19	10776	PAR-CLIP	20371350
mirtarbase	hsa-miR-30e-5p	ARPP19	10776	PAR-CLIP	23592263
mirtarbase	hsa-miR-223-5p	ARRB1	408	HITS-CLIP	22927820
mirtarbase	hsa-miR-223-5p	ARRB1	408	HITS-CLIP	24906430
mirtarbase	hsa-miR-223-5p	ARRB1	408	HITS-CLIP	27418678
mirtarbase	hsa-miR-26b-5p	ARRB1	408	Microarray	19088304
mirtarbase	hsa-miR-181a-5p	ARRB2	409	HITS-CLIP	22473208
mirtarbase	hsa-miR-148a-3p	ARRDC3	57561	Sequencing	20371350
mirtarbase	hsa-miR-181a-5p	ARRDC3	57561	HITS-CLIP	22473208
mirtarbase	hsa-miR-181a-5p	ARSJ	79642	PAR-CLIP	21572407
mirtarbase	hsa-miR-203a-3p	ASAP1	50807	Immunohistochemistry//qRT-PCR//Western blot	24682952
mirtarbase	hsa-miR-181a-5p	ASB1	51665	HITS-CLIP	22473208
mirtarbase	hsa-miR-223-5p	ASB11	140456	PAR-CLIP	23446348
mirtarbase	hsa-miR-223-5p	ASB11	140456	PAR-CLIP//HITS-CLIP	21572407
mirtarbase	hsa-miR-7-5p	ASB2	51676	Microarray	17612493
mirtarbase	hsa-miR-30e-5p	ASB3	100302652	HITS-CLIP	27418678
mirtarbase	hsa-miR-30e-5p	ASB3	51130	HITS-CLIP	22473208
mirtarbase	hsa-miR-30e-5p	ASB3	51130	HITS-CLIP	27418678
mirtarbase	hsa-miR-148a-3p	ASB6	140459	PAR-CLIP	21572407
mirtarbase	hsa-miR-26a-5p	ASCC2	84164	CLASH	23622248
mirtarbase	hsa-let-7f-5p	ASCC3	10973	CLASH	23622248
mirtarbase	hsa-miR-26b-5p	ASF1B	55723	Microarray	19088304
mirtarbase	hsa-miR-223-5p	ASH1L	55870	HITS-CLIP	23313552
mirtarbase	hsa-miR-223-5p	ASH1L	55870	PAR-CLIP//HITS-CLIP	21572407
mirtarbase	hsa-miR-26b-5p	ASNS	440	Microarray	19088304
mirtarbase	hsa-miR-203a-3p	ASPA	443	PAR-CLIP	22100165
mirtarbase	hsa-miR-26b-5p	ASPM	259266	Microarray	19088304
mirtarbase	hsa-miR-26b-5p	ASPN	54829	Microarray	19088304
mirtarbase	hsa-miR-21-5p	ASRGL1	80150	Microarray	18591254
mirecords	hsa-let-7f-5p	ASS1	445		18560586
mirtarbase	hsa-let-7f-5p	ASTE1	28990	CLASH	23622248
mirtarbase	hsa-miR-26b-5p	ASTN2	23245	Microarray	19088304
mirtarbase	hsa-miR-7-5p	ASXL1	171023	PAR-CLIP	23592263
mirtarbase	hsa-miR-221-3p	ASXL2	55252	CLASH	23622248
mirtarbase	hsa-miR-221-3p	ASXL3	80816	Sequencing	20371350
mirtarbase	hsa-miR-26a-5p	ASXL3	80816	HITS-CLIP	23824327
mirtarbase	hsa-miR-26b-5p	ASXL3	80816	HITS-CLIP	23824327
mirtarbase	hsa-miR-26b-5p	ASXL3	80816	Microarray	19088304
mirtarbase	hsa-miR-221-3p	ASZ1	136991	Luciferase reporter assay//Microarray//qRT-PCR//Western blot	23579640
mirtarbase	hsa-miR-21-5p	ATAD2B	54454	Microarray	18591254
mirtarbase	hsa-miR-26b-5p	ATAD2B	54454	Microarray	19088304
mirtarbase	hsa-miR-26b-5p	ATAT1	79969	Microarray	19088304
mirtarbase	hsa-miR-21-5p	ATF2	1386	Microarray	18591254
mirtarbase	hsa-miR-26b-5p	ATF3	467	Microarray	19088304
mirtarbase	hsa-miR-142-3p	ATF5	22809	HITS-CLIP	22473208
mirtarbase	hsa-miR-7-5p	ATF5	22809	Microarray	19073608
mirtarbase	hsa-miR-21-5p	ATF7IP	55729	HITS-CLIP	19536157
mirtarbase	hsa-miR-181a-5p	ATF7IP2	80063	Microarray	17612493
mirtarbase	hsa-miR-7-5p	ATF7IP2	80063	Microarray	17612493
mirtarbase	hsa-miR-181a-5p	ATG10	83734	Microarray	17612493
mirtarbase	hsa-let-7f-5p	ATG12	9140	PAR-CLIP	23592263
mirtarbase	hsa-let-7g-5p	ATG12	9140	PAR-CLIP	23592263
mirtarbase	hsa-miR-142-3p	ATG16L1	55054	HITS-CLIP	22473208
mirtarbase	hsa-miR-181a-5p	ATG2B	55102	HITS-CLIP	22473208
mirtarbase	hsa-miR-181a-5p	ATG5	9474	Immunoblot//Luciferase reporter assay//qRT-PCR	23322078
mirtarbase	hsa-miR-181a-5p	ATG5	9474	qRT-PCR//Western blot	26589846
mirtarbase	hsa-miR-30e-5p	ATG5	9474	Luciferase reporter assay//qRT-PCR//Western blot	27372603
mirtarbase	hsa-let-7f-5p	ATG9A	79065	PAR-CLIP	23592263
mirtarbase	hsa-let-7f-5p	ATG9A	79065	PAR-CLIP	26701625
mirtarbase	hsa-let-7f-5p	ATG9A	79065	PAR-CLIP	27292025
mirtarbase	hsa-let-7g-5p	ATG9A	79065	PAR-CLIP	23592263
mirtarbase	hsa-let-7g-5p	ATG9A	79065	PAR-CLIP	26701625
mirtarbase	hsa-let-7g-5p	ATG9A	79065	PAR-CLIP	27292025
mirtarbase	hsa-miR-142-3p	ATG9A	79065	PAR-CLIP	23592263
mirtarbase	hsa-miR-7-5p	ATG9A	79065	PAR-CLIP	20371350
mirtarbase	hsa-miR-7-5p	ATG9A	79065	PAR-CLIP	21572407
mirtarbase	hsa-miR-7-5p	ATG9A	79065	PAR-CLIP	24398324
mirtarbase	hsa-let-7f-5p	ATL1	51062	CLASH	23622248
mirtarbase	hsa-miR-221-3p	ATL2	64225	Sequencing	20371350
mirtarbase	hsa-miR-142-5p	ATL3	25923	PAR-CLIP	23592263
mirtarbase	hsa-miR-181a-5p	ATM	472	Flow//Luciferase reporter assay//qRT-PCR//Western blot	24531888
mirtarbase	hsa-miR-181a-5p	ATM	472	HITS-CLIP	22473208
mirtarbase	hsa-miR-181a-5p	ATM	472	Immunoblot//Luciferase reporter assay//qRT-PCR	21274007
mirtarbase	hsa-miR-181a-5p	ATM	472	Luciferase reporter assay//Western blot	23656790
mirtarbase	hsa-miR-181a-5p	ATM	472	Luciferase reporter assay//qRT-PCR//Western blot	26113450
mirtarbase	hsa-miR-181a-5p	ATM	472	PAR-CLIP	20371350
mirtarbase	hsa-miR-203a-3p	ATM	472	Immunohistochemistry//Luciferase reporter assay//qRT-PCR//Western blot	27542403
mirtarbase	hsa-miR-203a-3p	ATM	472	PAR-CLIP	22100165
mirtarbase	hsa-miR-203a-3p	ATM	472	PAR-CLIP	22291592
mirtarbase	hsa-miR-203a-3p	ATM	472	qRT-PCR//Western blot	24145123
mirtarbase	hsa-miR-26a-5p	ATM	472	Luciferase reporter assay//qRT-PCR//Western blot	24211747
mirtarbase	hsa-miR-30e-5p	ATM	472	HITS-CLIP	22473208
mirtarbase	hsa-miR-21-5p	ATMIN	23300	Sequencing	20371350
mirtarbase	hsa-miR-27a-3p	ATN1	1822	CLASH	23622248
mirtarbase	hsa-miR-27b-3p	ATN1	1822	CLASH	23622248
mirtarbase	hsa-miR-21-5p	ATP11B	23200	Microarray	18591254
mirtarbase	hsa-miR-142-5p	ATP13A3	79572	PAR-CLIP	20371350
mirtarbase	hsa-miR-26a-5p	ATP1A1	476	CLASH	23622248
mirtarbase	hsa-miR-26b-5p	ATP1A1	476	Microarray	19088304
mirtarbase	hsa-miR-26b-5p	ATP1A3	478	Microarray	19088304
mirtarbase	hsa-miR-7-5p	ATP1B3	483	Microarray	19073608
mirtarbase	hsa-let-7f-5p	ATP2A2	488	CLASH	23622248
mirtarbase	hsa-miR-142-3p	ATP2A2	488	HITS-CLIP	22473208
mirtarbase	hsa-miR-142-3p	ATP2A2	488	Microarray	17612493
mirtarbase	hsa-miR-221-3p	ATP2A2	488	CLASH	23622248
mirtarbase	hsa-miR-223-5p	ATP2A2	488	PAR-CLIP	20371350
mirtarbase	hsa-miR-223-5p	ATP2A2	488	PAR-CLIP	21572407
mirtarbase	hsa-miR-26b-5p	ATP2A2	488	Microarray	19088304
mirtarbase	hsa-miR-30e-5p	ATP2A2	488	HITS-CLIP	23313552
mirtarbase	hsa-miR-142-3p	ATP2B1	490	HITS-CLIP	22473208
mirtarbase	hsa-miR-181a-5p	ATP2B1	490	HITS-CLIP	22473208
mirtarbase	hsa-miR-26a-5p	ATP2B1	490	PAR-CLIP	20371350
mirtarbase	hsa-miR-26b-5p	ATP2B1	490	PAR-CLIP	20371350
mirtarbase	hsa-miR-21-5p	ATP2B4	493	Microarray	18591254
mirtarbase	hsa-miR-26a-5p	ATP5F1A	498	CLASH	23622248
mirtarbase	hsa-let-7f-5p	ATP5F1B	506	CLASH	23622248
mirtarbase	hsa-miR-1290	ATP5F1E	514	HITS-CLIP	23824327
mirtarbase	hsa-miR-142-5p	ATP5MC3	518	PAR-CLIP	21572407
mirtarbase	hsa-miR-27a-3p	ATP5MC3	518	HITS-CLIP	22473208
mirtarbase	hsa-miR-27b-3p	ATP5MC3	518	HITS-CLIP	22473208
mirtarbase	hsa-miR-26b-5p	ATP5MPL	9556	Microarray	19088304
mirtarbase	hsa-miR-30e-5p	ATP5PO	539	CLASH	23622248
mirtarbase	hsa-miR-26b-5p	ATP6AP1	537	Microarray	19088304
mirtarbase	hsa-miR-26b-5p	ATP6AP2	10159	Microarray	19088304
mirtarbase	hsa-miR-26b-5p	ATP6V0D1	9114	Microarray	19088304
mirtarbase	hsa-miR-143-3p	ATP6V0E1	8992	PAR-CLIP	27292025
mirtarbase	hsa-miR-181a-5p	ATP6V0E1	8992	Microarray	17612493
mirtarbase	hsa-miR-26b-5p	ATP6V1A	523	Microarray	19088304
mirtarbase	hsa-miR-221-3p	ATP6V1E1	529	CLASH	23622248
mirtarbase	hsa-let-7f-5p	ATP6V1F	9296	PAR-CLIP	23592263
mirtarbase	hsa-let-7f-5p	ATP6V1F	9296	PAR-CLIP	24398324
mirtarbase	hsa-let-7f-5p	ATP6V1F	9296	PAR-CLIP	26701625
mirtarbase	hsa-let-7f-5p	ATP6V1F	9296	PAR-CLIP	27292025
mirtarbase	hsa-let-7g-5p	ATP6V1F	9296	PAR-CLIP	23592263
mirtarbase	hsa-let-7g-5p	ATP6V1F	9296	PAR-CLIP	24398324
mirtarbase	hsa-let-7g-5p	ATP6V1F	9296	PAR-CLIP	26701625
mirtarbase	hsa-let-7g-5p	ATP6V1F	9296	PAR-CLIP	27292025
mirtarbase	hsa-let-7f-5p	ATP6V1G1	9550	PAR-CLIP	22100165
mirtarbase	hsa-let-7f-5p	ATP6V1G1	9550	PAR-CLIP	22291592
mirtarbase	hsa-let-7f-5p	ATP6V1G1	9550	PAR-CLIP	23446348
mirtarbase	hsa-let-7g-5p	ATP6V1G1	9550	PAR-CLIP	22100165
mirtarbase	hsa-let-7g-5p	ATP6V1G1	9550	PAR-CLIP	22291592
mirtarbase	hsa-let-7g-5p	ATP6V1G1	9550	PAR-CLIP	23446348
mirtarbase	hsa-miR-223-5p	ATP7A	538	PAR-CLIP//HITS-CLIP	21572407
mirtarbase	hsa-miR-26a-5p	ATP7B	540	CLASH	23622248
mirtarbase	hsa-miR-26b-5p	ATP7B	540	Microarray	19088304
mirtarbase	hsa-miR-27a-3p	ATP7B	540	CLASH	23622248
mirtarbase	hsa-miR-27b-3p	ATP7B	540	CLASH	23622248
mirtarbase	hsa-miR-181a-5p	ATP8A1	10396	Sequencing	20371350
mirtarbase	hsa-miR-181a-5p	ATP8B1	5205	PAR-CLIP	22012620
mirtarbase	hsa-miR-27a-3p	ATPAF1	64756	PAR-CLIP	26701625
mirtarbase	hsa-miR-27a-3p	ATPAF1	64756	PAR-CLIP	27292025
mirtarbase	hsa-miR-27b-3p	ATPAF1	64756	PAR-CLIP	26701625
mirtarbase	hsa-miR-27b-3p	ATPAF1	64756	PAR-CLIP	27292025
mirtarbase	hsa-let-7f-5p	ATR	545	CLASH	23622248
mirtarbase	hsa-miR-21-5p	ATRX	546	Microarray	18591254
mirtarbase	hsa-miR-1290	ATXN1	6310	PAR-CLIP	21572407
mirtarbase	hsa-miR-1290	ATXN1	6310	PAR-CLIP	23446348
mirtarbase	hsa-miR-142-5p	ATXN1	6310	PAR-CLIP	21572407
mirtarbase	hsa-miR-221-3p	ATXN1	6310	CLASH	23622248
mirtarbase	hsa-miR-221-3p	ATXN1	6310	Sequencing	20371350
mirtarbase	hsa-miR-7-5p	ATXN1	6310	PAR-CLIP	20371350
mirtarbase	hsa-miR-21-5p	ATXN10	25814	HITS-CLIP	22473208
mirtarbase	hsa-let-7f-5p	ATXN2	6311	HITS-CLIP	23313552
mirtarbase	hsa-let-7g-5p	ATXN2	6311	HITS-CLIP	23313552
mirtarbase	hsa-let-7f-5p	ATXN2L	11273	CLASH	23622248
mirtarbase	hsa-miR-26b-5p	ATXN2L	11273	Microarray	19088304
mirtarbase	hsa-miR-142-3p	ATXN3	4287	PAR-CLIP	20371350
mirtarbase	hsa-miR-142-3p	ATXN3	4287	PAR-CLIP	21572407
mirtarbase	hsa-miR-142-3p	ATXN3	4287	PAR-CLIP	23446348
mirtarbase	hsa-miR-7-5p	ATXN3	4287	PAR-CLIP	20371350
mirtarbase	hsa-miR-181a-5p	ATXN7	6314	HITS-CLIP	23824327
mirtarbase	hsa-let-7f-5p	ATXN7L3	56970	PAR-CLIP	23592263
mirtarbase	hsa-let-7g-5p	ATXN7L3	56970	PAR-CLIP	23592263
mirtarbase	hsa-let-7f-5p	ATXN7L3B	552889	PAR-CLIP	20371350
mirtarbase	hsa-let-7f-5p	ATXN7L3B	552889	PAR-CLIP	23592263
mirtarbase	hsa-let-7g-5p	ATXN7L3B	552889	PAR-CLIP	20371350
mirtarbase	hsa-let-7g-5p	ATXN7L3B	552889	PAR-CLIP	23592263
mirtarbase	hsa-miR-142-5p	ATXN7L3B	552889	PAR-CLIP	23592263
mirtarbase	hsa-miR-26b-5p	AUP1	550	Microarray	19088304
mirtarbase	hsa-miR-7-5p	AUP1	550	Microarray	19073608
mirtarbase	hsa-miR-1290	AURKA	6790	PAR-CLIP	26701625
mirtarbase	hsa-miR-26a-5p	AURKAIP1	54998	CLASH	23622248
mirtarbase	hsa-miR-148a-3p	AURKB	9212	CLASH	23622248
mirtarbase	hsa-miR-21-5p	AUTS2	26053	Microarray	19253296
mirtarbase	hsa-miR-30e-5p	AVL9	23080	HITS-CLIP	22473208
mirtarbase	hsa-miR-142-3p	AZF1	560	PAR-CLIP	20371350
mirtarbase	hsa-miR-30e-5p	AZIN1	51582	HITS-CLIP	22473208
mirtarbase	hsa-miR-30e-5p	AZIN1	51582	PAR-CLIP	21572407
mirtarbase	hsa-miR-30e-5p	AZIN1	51582	PAR-CLIP	23592263
mirtarbase	hsa-miR-142-5p	B2M	567	PAR-CLIP	20371350
mirtarbase	hsa-miR-142-5p	B2M	567	PAR-CLIP	21572407
mirtarbase	hsa-miR-142-5p	B2M	567	PAR-CLIP	23446348
mirtarbase	hsa-miR-142-5p	B2M	567	PAR-CLIP	23592263
mirtarbase	hsa-miR-142-5p	B2M	567	PAR-CLIP	24398324
mirtarbase	hsa-miR-21-5p	B3GALNT1	8706	Microarray	18591254
mirtarbase	hsa-miR-221-3p	B3GALNT2	148789	PAR-CLIP	27292025
mirtarbase	hsa-miR-26b-5p	B3GALT1	8708	Microarray	19088304
mirtarbase	hsa-miR-26a-5p	B3GALT5	10317	PAR-CLIP	22012620
mirtarbase	hsa-miR-26b-5p	B3GALT5	10317	PAR-CLIP	22012620
mirtarbase	hsa-miR-21-5p	B3GNT5	84002	Microarray	18591254
mirtarbase	hsa-miR-30e-5p	B4GALT1	2683	HITS-CLIP	22473208
mirtarbase	hsa-miR-221-3p	B4GALT2	8704	CLASH	23622248
mirtarbase	hsa-miR-30e-5p	B4GALT5	9334	HITS-CLIP	23824327
mirtarbase	hsa-miR-30e-5p	B4GALT5	9334	PAR-CLIP	20371350
mirtarbase	hsa-miR-148a-3p	B4GALT7	11285	PAR-CLIP	23592263
mirtarbase	hsa-let-7f-5p	B4GAT1	11041	Microarray	22942087
mirtarbase	hsa-miR-142-5p	BAAT	570	PAR-CLIP	20371350
mirtarbase	hsa-miR-26b-5p	BABAM1	29086	Microarray	19088304
mirtarbase	hsa-miR-26b-5p	BACE1	23621	Microarray	19088304
mirtarbase	hsa-let-7f-5p	BACH1	571	PAR-CLIP	20371350
mirtarbase	hsa-let-7g-5p	BACH1	571	PAR-CLIP	20371350
mirtarbase	hsa-miR-142-3p	BACH1	571	PAR-CLIP	20371350
mirtarbase	hsa-miR-142-5p	BACH2	60468	Luciferase reporter assay	28123644
mirtarbase	hsa-miR-142-5p	BAG2	9532	PAR-CLIP	22100165
mirtarbase	hsa-miR-181a-5p	BAG2	9532	Microarray	17612493
mirtarbase	hsa-miR-27a-3p	BAG2	9532	HITS-CLIP	19536157
mirtarbase	hsa-miR-27b-3p	BAG2	9532	HITS-CLIP	19536157
mirtarbase	hsa-miR-143-3p	BAG3	9531	Immunohistochemistry//Luciferase reporter assay//Western blot	26541455
mirtarbase	hsa-miR-221-3p	BAG3	9531	CLASH	23622248
mirtarbase	hsa-miR-26b-5p	BAG3	9531	Microarray	19088304
mirtarbase	hsa-miR-26a-5p	BAG4	9530	Luciferase reporter assay//Microarray	23190898
mirtarbase	hsa-miR-30e-5p	BAG4	9530	PAR-CLIP	24398324
mirtarbase	hsa-miR-26b-5p	BAHD1	22893	Microarray	19088304
mirtarbase	hsa-miR-30e-5p	BAHD1	22893	HITS-CLIP	23824327
mirtarbase	hsa-miR-142-3p	BAK1	578	PAR-CLIP	23592263
mirtarbase	hsa-miR-203a-3p	BANF1	8815	Luciferase reporter assay//qRT-PCR//Western blot	25658920
mirtarbase	hsa-miR-21-5p	BASP1	10409	Luciferase reporter assay//Quantitative proteomic approach	19253296
mirtarbase	hsa-miR-26b-5p	BATF	10538	Microarray	19088304
mirtarbase	hsa-miR-26b-5p	BATF3	55509	Microarray	19088304
mirtarbase	hsa-miR-148a-3p	BAX	581	Luciferase reporter assay//qRT-PCR//Western blot	27261578
mirtarbase	hsa-miR-181a-5p	BAX	581	Luciferase reporter assay//Western blot	26028030
mirtarbase	hsa-miR-7-5p	BAX	581	Luciferase reporter assay	27158385
mirtarbase	hsa-let-7f-5p	BAZ1B	9031	CLASH	23622248
mirtarbase	hsa-miR-21-5p	BAZ1B	9031	Microarray	18591254
mirtarbase	hsa-miR-181a-5p	BAZ2A	11176	HITS-CLIP	22473208
mirtarbase	hsa-miR-27b-3p	BAZ2A	11176	CLASH	23622248
mirtarbase	hsa-miR-148a-3p	BAZ2B	29994	PAR-CLIP	21572407
mirecords	hsa-miR-221-3p	BBC3	100422832	Western blot//Luciferase activity assay	20813046
mirecords	hsa-miR-221-3p	BBC3	100422899	Western blot//Luciferase activity assay	20813046
mirecords	hsa-miR-221-3p	BBC3	27113	Western blot//Luciferase activity assay	20813046
mirtarbase	hsa-miR-143-3p	BBC3	27113	PAR-CLIP	23592263
mirtarbase	hsa-miR-143-3p	BBC3	27113	PAR-CLIP	24398324
mirtarbase	hsa-miR-143-3p	BBC3	27113	PAR-CLIP	26701625
mirtarbase	hsa-miR-221-3p	BBC3	27113	Immunoblot//In situ hybridization//Luciferase reporter assay//Microarray//qRT-PCR//AGO2 binding RNA immunoprecipitation qRT-PCR//	26249174
mirtarbase	hsa-miR-221-3p	BBC3	27113	Immunohistochemistry//In situ hybridization//Luciferase reporter assay//Northern blot//Western blot	20813046
mirtarbase	hsa-miR-221-3p	BBC3	27113	Luciferase reporter assay	21042732
mirtarbase	hsa-miR-221-3p	BBC3	27113	Luciferase reporter assay//qRT-PCR//Western blot//Reporter assay	22075712
mirtarbase	hsa-miR-221-3p	BBC3	27113	Reporter assay;Microarray	20018759
mirtarbase	hsa-miR-142-5p	BBS10	79738	PAR-CLIP	20371350
mirtarbase	hsa-miR-26a-5p	BBX	56987	CLASH	23622248
mirtarbase	hsa-miR-21-5p	BCAT1	586	Microarray	18591254
mirtarbase	hsa-miR-7-5p	BCAT1	586	PAR-CLIP	20371350
mirtarbase	hsa-miR-7-5p	BCAT1	586	PAR-CLIP	23592263
mirtarbase	hsa-miR-7-5p	BCCIP	56647	Microarray	19073608
mirtarbase	hsa-miR-26b-5p	BCHE	590	Microarray	19088304
mirtarbase	hsa-miR-7-5p	BCKDK	10295	Microarray	19073608
mirecords	hsa-miR-143-3p	Bcl-2		Western blot//Luciferase activity assay	20878132
mirtarbase	hsa-miR-21-5p	BCL10	8915	Luciferase reporter assay//Western blot	25327529
mirtarbase	hsa-miR-203a-3p	BCL11B	64919	Microarray	23807165
mirtarbase	hsa-miR-26b-5p	BCL11B	64919	Microarray	19088304
mirecords	hsa-miR-181a-5p	BCL2	596	Western blot	20204284
mirtarbase	hsa-miR-143-3p	BCL2	596	Immunofluorescence//Immunohistochemistry//Luciferase reporter assay//qRT-PCR//Western blot	25492481
mirtarbase	hsa-miR-143-3p	BCL2	596	Luciferase reporter assay//Microarray//qRT-PCR//Western blot	22160209
mirtarbase	hsa-miR-143-3p	BCL2	596	Western blot	19843160
mirtarbase	hsa-miR-143-3p	BCL2	596	Western blot	23276710
mirtarbase	hsa-miR-148a-3p	BCL2	596	Luciferase reporter assay	21455217
mirtarbase	hsa-miR-181a-5p	BCL2	596	Immunoblot//Luciferase reporter assay//qRT-PCR//Western blot	21958558
mirtarbase	hsa-miR-181a-5p	BCL2	596	Immunoblot//qRT-PCR//Western blot	24002437
mirtarbase	hsa-miR-181a-5p	BCL2	596	Luciferase reporter assay	22285729
mirtarbase	hsa-miR-181a-5p	BCL2	596	Luciferase reporter assay	22610076
mirtarbase	hsa-miR-181a-5p	BCL2	596	Luciferase reporter assay//qRT-PCR//Western blot	22209977
mirtarbase	hsa-miR-181a-5p	BCL2	596	Luciferase reporter assay//qRT-PCR//Western blot	24335172
mirtarbase	hsa-miR-181a-5p	BCL2	596	Luciferase reporter assay//qRT-PCR//Western blot	27802900
mirtarbase	hsa-miR-181a-5p	BCL2	596	Luciferase reporter assay//qRT-PCR//Western blot//Reporter assay;Western blot;Other	20162574
mirtarbase	hsa-miR-21-5p	BCL2	596	ChIP-seq//Immunofluorescence//Western blot	24606718
mirtarbase	hsa-miR-21-5p	BCL2	596	Luciferase reporter assay	17072344
mirtarbase	hsa-miR-21-5p	BCL2	596	Luciferase reporter assay	22710123
mirtarbase	hsa-miR-21-5p	BCL2	596	Luciferase reporter assay//Western blot	21376256
mirtarbase	hsa-miR-21-5p	BCL2	596	Luciferase reporter assay//Western blot	25327529
mirtarbase	hsa-miR-21-5p	BCL2	596	Western blot	21468550
mirtarbase	hsa-miR-21-5p	BCL2	596	Western blot;Other	20048743
mirtarbase	hsa-miR-21-5p	BCL2	596	qRT-PCR//Western blot	22528454
mirtarbase	hsa-miR-7-5p	BCL2	596	GFP reporter assay//Luciferase reporter assay//qRT-PCR//Western blot//Reporter assay;Western blot;qRT-PCR;Other	21750649
mirtarbase	hsa-miR-7-5p	BCL2	596	qRT-PCR//Western blot	26464649
mirtarbase	hsa-let-7g-5p	BCL2L1	598	Luciferase reporter assay//qRT-PCR//Western blot	20347499
mirtarbase	hsa-miR-148a-3p	BCL2L11	10018	Immunoblot//Luciferase reporter assay//qRT-PCR	24425048
mirtarbase	hsa-miR-181a-5p	BCL2L11	10018	Luciferase reporter assay	23241956
mirtarbase	hsa-miR-181a-5p	BCL2L11	10018	Luciferase reporter assay//qRT-PCR//Western blot	20841506
mirtarbase	hsa-miR-221-3p	BCL2L11	10018	CLASH	23622248
mirtarbase	hsa-miR-221-3p	BCL2L11	10018	Luciferase reporter assay//qRT-PCR//Western blot	26503209
mirtarbase	hsa-miR-221-3p	BCL2L11	10018	PAR-CLIP	20371350
mirtarbase	hsa-miR-221-3p	BCL2L11	10018	PAR-CLIP	23446348
mirtarbase	hsa-miR-7-5p	BCL2L12	83596	PAR-CLIP	20371350
mirtarbase	hsa-miR-203a-3p	BCL2L2	599	Immunoblot//Immunoprecipitaion//Luciferase reporter assay//qRT-PCR	24219989
mirtarbase	hsa-miR-203a-3p	BCL2L2	599	Luciferase reporter assay//qRT-PCR//Western blot	21205209
mirtarbase	hsa-miR-203a-3p	BCL2L2	599	Luciferase reporter assay//qRT-PCR//Western blot	26599571
mirtarbase	hsa-miR-203a-3p	BCL2L2	599	Luciferase reporter assay//qRT-PCR//Western blot	27142767
mirtarbase	hsa-miR-26b-5p	BCL3	602	Microarray	19088304
mirtarbase	hsa-miR-21-5p	BCL6	604	Luciferase reporter assay	23416424
mirtarbase	hsa-miR-1290	BCL7A	605	PAR-CLIP	20371350
mirtarbase	hsa-miR-203a-3p	BCL7A	605	Microarray	23807165
mirtarbase	hsa-miR-21-5p	BCL7A	605	HITS-CLIP	22473208
mirtarbase	hsa-miR-26a-5p	BCL7B	9275	HITS-CLIP	22473208
mirtarbase	hsa-miR-26b-5p	BCL7B	9275	HITS-CLIP	22473208
mirtarbase	hsa-miR-7-5p	BCL9L	283149	Microarray	19073608
mirtarbase	hsa-miR-142-3p	BCLAF1	9774	HITS-CLIP	22473208
mirtarbase	hsa-miR-26b-5p	BCLAF1	9774	CLASH	23622248
mirtarbase	hsa-let-7f-5p	BCOR	54880	CLASH	23622248
mirtarbase	hsa-miR-142-5p	BCOR	54880	PAR-CLIP	20371350
mirtarbase	hsa-miR-21-5p	BDH2	56898	Microarray	20048743
mirtarbase	hsa-miR-22-3p	BDNF	627	Luciferase reporter assay//Microarray	21168126
mirtarbase	hsa-miR-27a-3p	BDNF-AS	497258	PAR-CLIP	23592263
mirtarbase	hsa-miR-27b-3p	BDNF-AS	497258	PAR-CLIP	23592263
mirtarbase	hsa-miR-142-5p	Becn1	56208	Luciferase reporter assay	26784440
mirtarbase	hsa-miR-221-3p	BECN1	8678	Luciferase reporter assay//qRT-PCR//Western blot	27940575
mirtarbase	hsa-miR-30e-5p	BECN1	8678	HITS-CLIP	22473208
mirtarbase	hsa-let-7f-5p	BEND4	389206	PAR-CLIP	20371350
mirtarbase	hsa-let-7f-5p	BEND4	389206	PAR-CLIP	21572407
mirtarbase	hsa-let-7g-5p	BEND4	389206	PAR-CLIP	20371350
mirtarbase	hsa-let-7g-5p	BEND4	389206	PAR-CLIP	21572407
mirtarbase	hsa-miR-26b-5p	BEND4	389206	Sequencing	20371350
mirtarbase	hsa-miR-27a-3p	BEX3	27018	PAR-CLIP	24398324
mirtarbase	hsa-miR-27b-3p	BEX3	27018	PAR-CLIP	24398324
mirtarbase	hsa-miR-26b-5p	BGLAP	632	Microarray	19088304
mirtarbase	hsa-miR-26a-5p	BID	637	HITS-CLIP	22473208
mirtarbase	hsa-miR-26b-5p	BID	637	HITS-CLIP	22473208
mirecords	hsa-miR-221-3p	BIM		Luciferase activity assay	19438724
mirtarbase	hsa-miR-203a-3p	BIRC5	332	Flow//Luciferase reporter assay//qRT-PCR//Western blot	23073851
mirtarbase	hsa-miR-203a-3p	BIRC5	332	Luciferase reporter assay	22306317
mirtarbase	hsa-miR-203a-3p	BIRC5	332	Luciferase reporter assay	26847520
mirtarbase	hsa-miR-203a-3p	BIRC5	332	Luciferase reporter assay//qRT-PCR//Western blot	22713668
mirtarbase	hsa-miR-203a-3p	BIRC5	332	Western blot	22886454
mirtarbase	hsa-miR-26b-5p	BLNK	29760	Microarray	19088304
mirtarbase	hsa-miR-181a-5p	BLOC1S2	282991	HITS-CLIP	22473208
mirtarbase	hsa-miR-26a-5p	BLOC1S2	282991	PAR-CLIP	20371350
mirtarbase	hsa-miR-26a-5p	BLOC1S2	282991	PAR-CLIP	23592263
mirtarbase	hsa-miR-26a-5p	BLOC1S2	282991	PAR-CLIP	24398324
mirtarbase	hsa-miR-26b-5p	BLOC1S2	282991	PAR-CLIP	20371350
mirtarbase	hsa-miR-26b-5p	BLOC1S2	282991	PAR-CLIP	23592263
mirtarbase	hsa-miR-26b-5p	BLOC1S2	282991	PAR-CLIP	24398324
mirtarbase	hsa-miR-26b-5p	BLOC1S5	63915	Microarray	19088304
mirtarbase	hsa-miR-26b-5p	BLVRB	645	Microarray	19088304
mirecords	hsa-miR-221-3p	BMF	90427	Western blot	19671867
mirtarbase	hsa-miR-221-3p	BMF	90427	Luciferase reporter assay//qRT-PCR//Western blot	19671867
mirtarbase	hsa-let-7g-5p	BMI1	648	Western blot;qRT-PCR	20309945
mirtarbase	hsa-miR-203a-3p	BMI1	648	Immunoblot//In situ hybridization//Luciferase reporter assay//qRT-PCR//Western blot	21159887
mirtarbase	hsa-miR-203a-3p	BMI1	648	Luciferase reporter assay	26847520
mirtarbase	hsa-miR-203a-3p	BMI1	648	Luciferase reporter assay//Microarray//qRT-PCR//Western blot	21840484
mirtarbase	hsa-miR-203a-3p	BMI1	648	Luciferase reporter assay//qRT-PCR//Immunocytochemistry//Western blot	25475727
mirtarbase	hsa-miR-203a-3p	BMI1	648	Luciferase reporter assay//qRT-PCR//Western blot	24219349
mirtarbase	hsa-miR-21-5p	BMI1	648	ChIP-seq//Immunofluorescence//Immunohistochemistry//Luciferase reporter assay//qRT-PCR//Western blot	27644439
mirtarbase	hsa-miR-27a-3p	BMI1	648	CLASH	23622248
mirtarbase	hsa-miR-30e-5p	BMI1	648	Immunohistochemistry//Luciferase reporter assay//Microarray//qRT-PCR//Western blot	24312366
mirtarbase	hsa-miR-26b-5p	BMP2	650	Microarray	19088304
mirtarbase	hsa-miR-26a-5p	BMP2K	55589	PAR-CLIP	20371350
mirtarbase	hsa-miR-26b-5p	BMP2K	55589	PAR-CLIP	20371350
mirtarbase	hsa-miR-148a-3p	BMP3	651	PAR-CLIP	21572407
mirtarbase	hsa-miR-181a-5p	BMP3	651	Microarray	22942087
mirtarbase	hsa-miR-22-3p	BMP6	654	Luciferase reporter assay	24163368
mirecords	hsa-miR-22-3p	BMP7	655	Western blot	19011694
mirtarbase	hsa-miR-22-3p	BMP7	655	Luciferase reporter assay	24163368
mirtarbase	hsa-miR-22-3p	BMP7	655	Luciferase reporter assay//qRT-PCR//Western blot	19011694
mirtarbase	hsa-miR-142-3p	BMP8A	353500	Microarray	17612493
mirtarbase	hsa-miR-26b-5p	BMP8B	656	Microarray	19088304
mirtarbase	hsa-miR-203a-3p	BMPR1A	657	PAR-CLIP	22100165
mirtarbase	hsa-miR-223-5p	BMPR1A	657	PAR-CLIP	20371350
mirtarbase	hsa-miR-223-5p	BMPR1A	657	PAR-CLIP	22012620
mirtarbase	hsa-miR-223-5p	BMPR1A	657	PAR-CLIP//HITS-CLIP	21572407
mirtarbase	hsa-miR-26a-5p	BMPR1A	657	HITS-CLIP	23824327
mirtarbase	hsa-miR-26a-5p	BMPR1A	657	PAR-CLIP	27292025
mirtarbase	hsa-miR-26b-5p	BMPR1A	657	HITS-CLIP	23824327
mirtarbase	hsa-miR-26b-5p	BMPR1A	657	PAR-CLIP	27292025
mirtarbase	hsa-miR-22-3p	BMPR1B	658	Luciferase reporter assay	24163368
mirecords	hsa-miR-21-5p	BMPR2	659		11829576
mirecords	hsa-miR-21-5p	BMPR2	659		17991735
mirecords	hsa-miR-21-5p	BMPR2	659	Western blot//Luciferase activity assay	19578724
mirtarbase	hsa-miR-181a-5p	BMPR2	659	HITS-CLIP	22473208
mirtarbase	hsa-miR-181a-5p	BMPR2	659	Microarray	22942087
mirtarbase	hsa-miR-21-5p	BMPR2	659	Luciferase reporter assay//qRT-PCR	18829576
mirtarbase	hsa-miR-21-5p	BMPR2	659	Luciferase reporter assay//qRT-PCR//Western blot	19578724
mirtarbase	hsa-miR-21-5p	BMPR2	659	Microarray	18591254
mirtarbase	hsa-miR-21-5p	BMPR2	659	qRT-PCR//Western blot	22227207
mirtarbase	hsa-miR-26b-5p	BMPR2	659	Microarray	19088304
mirtarbase	hsa-miR-26b-5p	BMPR2	659	Sequencing	20371350
mirtarbase	hsa-miR-27a-3p	BMPR2	659	HITS-CLIP	22473208
mirtarbase	hsa-miR-27b-3p	BMPR2	659	HITS-CLIP	22473208
mirtarbase	hsa-miR-7-5p	BMPR2	659	Microarray	17612493
mirtarbase	hsa-miR-30e-5p	BMT2	154743	HITS-CLIP	22473208
mirtarbase	hsa-miR-26b-5p	BNC1	646	Microarray	19088304
mirtarbase	hsa-miR-223-5p	BNC2	54796	HITS-CLIP	24906430
mirtarbase	hsa-miR-223-5p	BNC2	54796	HITS-CLIP	27418678
mirtarbase	hsa-miR-26b-5p	BNC2	54796	Microarray	19088304
mirtarbase	hsa-miR-21-5p	BNIP2	663	HITS-CLIP	22473208
mirtarbase	hsa-miR-221-3p	BNIP3	664	Luciferase reporter assay//Microarray//qRT-PCR//Western blot	20018759
mirtarbase	hsa-miR-27a-3p	BNIP3	664	Microarray//qRT-PCR	22815788
mirtarbase	hsa-miR-27b-3p	BNIP3	664	Microarray//qRT-PCR	22815788
mirecords	hsa-miR-221-3p	BNIP3L	665	Western blot	20018759
mirtarbase	hsa-miR-221-3p	BNIP3L	665	Reporter assay;Western blot;qRT-PCR;Microarray	20018759
mirtarbase	hsa-miR-21-5p	BOC	91653	Microarray	18591254
mirtarbase	hsa-miR-142-3p	BOD1	91272	HITS-CLIP	22473208
mirtarbase	hsa-miR-142-3p	BOD1	91272	Luciferase reporter assay//qRT-PCR//Western blot	27527863
mirtarbase	hsa-miR-142-3p	BOD1	91272	Microarray	17612493
mirtarbase	hsa-miR-26b-5p	BOLA2	552900	Microarray	19088304
mirtarbase	hsa-miR-26b-5p	BOLA2B	654483	Microarray	19088304
mirtarbase	hsa-miR-203a-3p	BOLA3	388962	PAR-CLIP	21572407
mirtarbase	hsa-miR-26b-5p	BORCS6	54785	Microarray	19088304
mirtarbase	hsa-miR-181a-5p	BPGM	669	Microarray	17612493
mirtarbase	hsa-miR-143-3p	BRAF	673	Luciferase reporter assay//qRT-PCR//Western blot	23128394
mirtarbase	hsa-miR-221-3p	BRAP	8315	Reporter assay;Microarray	20018759
mirtarbase	hsa-miR-27a-3p	BRAT1	221927	CLASH	23622248
mirtarbase	hsa-miR-27b-3p	BRAT1	221927	CLASH	23622248
mirtarbase	hsa-miR-181a-5p	BRCA1	672	CLASH	23622248
mirtarbase	hsa-miR-21-5p	BRCA1	672	Microarray	18591254
mirtarbase	hsa-miR-26a-5p	BRCA1	672	PAR-CLIP	23446348
mirtarbase	hsa-miR-26b-5p	BRCA1	672	PAR-CLIP	23446348
mirtarbase	hsa-miR-223-5p	BRCC3	79184	HITS-CLIP	23824327
mirtarbase	hsa-miR-223-5p	BRCC3	79184	HITS-CLIP	27418678
mirtarbase	hsa-miR-223-5p	BRCC3	79184	PAR-CLIP	23446348
mirtarbase	hsa-miR-223-5p	BRCC3	79184	PAR-CLIP//HITS-CLIP	21572407
mirtarbase	hsa-let-7g-5p	BRD1	23774	CLASH	23622248
mirtarbase	hsa-miR-221-3p	BRD1	23774	Sequencing	20371350
mirtarbase	hsa-miR-143-3p	BRD2	6046	PAR-CLIP	26701625
mirtarbase	hsa-miR-26b-5p	BRD3	8019	Microarray	19088304
mirtarbase	hsa-miR-26b-5p	BRD4	23476	Microarray	19088304
mirtarbase	hsa-miR-26b-5p	BRD8	10902	Microarray	19088304
mirtarbase	hsa-miR-26b-5p	BRDT	676	Microarray	19088304
mirtarbase	hsa-let-7f-5p	BRI3BP	140707	HITS-CLIP	23706177
mirtarbase	hsa-let-7g-5p	BRI3BP	140707	HITS-CLIP	23706177
mirtarbase	hsa-miR-1290	BRI3BP	140707	HITS-CLIP	23824327
mirtarbase	hsa-miR-1290	BRI3BP	140707	PAR-CLIP	22012620
mirtarbase	hsa-miR-223-5p	BRI3BP	140707	PAR-CLIP	23446348
mirtarbase	hsa-miR-223-5p	BRI3BP	140707	PAR-CLIP//HITS-CLIP	21572407
mirtarbase	hsa-miR-142-5p	BRIX1	55299	PAR-CLIP	23446348
mirtarbase	hsa-miR-142-3p	BRMS1L	84312	Microarray	17612493
mirtarbase	hsa-miR-181a-5p	BRMS1L	84312	Microarray	17612493
mirtarbase	hsa-miR-26b-5p	BRSK2	9024	Microarray	19088304
mirtarbase	hsa-miR-221-3p	BRWD1	54014	HITS-CLIP	23313552
mirtarbase	hsa-miR-22-3p	BRWD3	254065	PAR-CLIP	23592263
mirtarbase	hsa-miR-223-5p	BRWD3	254065	PAR-CLIP	20371350
mirtarbase	hsa-miR-223-5p	BRWD3	254065	PAR-CLIP	23592263
mirtarbase	hsa-miR-22-3p	BSG	682	Immunohistochemistry//Luciferase reporter assay//qRT-PCR//Western blot	28184176
mirtarbase	hsa-miR-22-3p	BSG	682	Luciferase reporter assay	24906624
mirtarbase	hsa-miR-30e-5p	BTBD1	53339	HITS-CLIP	22473208
mirtarbase	hsa-miR-223-5p	BTBD19	149478	PAR-CLIP	23446348
mirtarbase	hsa-miR-148a-3p	BTBD3	22903	PAR-CLIP	22012620
mirtarbase	hsa-miR-148a-3p	BTBD3	22903	PAR-CLIP	23446348
mirtarbase	hsa-miR-148a-3p	BTBD3	22903	PAR-CLIP	23592263
mirtarbase	hsa-miR-148a-3p	BTBD3	22903	PAR-CLIP	24398324
mirtarbase	hsa-miR-148a-3p	BTBD3	22903	PAR-CLIP	27292025
mirtarbase	hsa-miR-148a-3p	BTBD3	22903	PAR-CLIP//HITS-CLIP	21572407
mirtarbase	hsa-miR-148a-3p	BTBD3	22903	Sequencing//PAR-CLIP	20371350
mirtarbase	hsa-miR-181a-5p	BTBD3	22903	Microarray	17612493
mirtarbase	hsa-miR-21-5p	BTBD3	22903	Microarray	18591254
mirtarbase	hsa-miR-26a-5p	BTBD3	22903	CLASH	23622248
mirtarbase	hsa-miR-142-3p	BTBD7	55727	HITS-CLIP	22473208
mirtarbase	hsa-miR-21-5p	BTBD7	55727	Microarray	18591254
mirtarbase	hsa-miR-30e-5p	BTBD7	55727	HITS-CLIP	22473208
mirtarbase	hsa-miR-26b-5p	BTBD8	23285	Microarray	19088304
mirtarbase	hsa-miR-26a-5p	BTBD9	114781	CLASH	23622248
mirtarbase	hsa-miR-30e-5p	BTBD9	114781	CLASH	23622248
mirtarbase	hsa-miR-22-3p	BTF3	689	Sequencing	20371350
mirtarbase	hsa-miR-143-3p	BTF3L4	91408	PAR-CLIP	20371350
mirtarbase	hsa-miR-143-3p	BTF3L4	91408	PAR-CLIP	21572407
mirtarbase	hsa-miR-203a-3p	BTG1	694	HITS-CLIP	23313552
mirtarbase	hsa-miR-22-3p	BTG1	694	Luciferase reporter assay	25449431
mirtarbase	hsa-miR-26b-5p	BTG1	694	Microarray	19088304
mirecords	hsa-miR-21-5p	BTG2	7832		17991735
mirecords	hsa-miR-21-5p	BTG2	7832	Western blot//fluorescence intensity	19546886
mirtarbase	hsa-miR-142-3p	BTG2	7832	PAR-CLIP	23592263
mirtarbase	hsa-miR-21-5p	BTG2	7832	Luciferase reporter assay//qRT-PCR//Western blot	24821435
mirtarbase	hsa-miR-21-5p	BTG2	7832	Microarray	18591254
mirtarbase	hsa-miR-21-5p	BTG2	7832	Sequencing	20371350
mirtarbase	hsa-miR-21-5p	BTG2	7832	Western blot	23857284
mirtarbase	hsa-miR-21-5p	BTG2	7832	qRT-PCR//Western blot	23446999
mirtarbase	hsa-miR-21-5p	BTG2	7832	semi-qRT-PCR//GFP reporter assay//Western blot//Luciferase reporter assay	19546886
mirtarbase	hsa-miR-26b-5p	BTG2	7832	Microarray	19088304
mirtarbase	hsa-miR-27a-3p	BTG2	7832	Flow//Luciferase reporter assay//qRT-PCR//Western blot	27409164
mirtarbase	hsa-miR-27a-3p	BTG2	7832	PAR-CLIP	24398324
mirtarbase	hsa-miR-27a-3p	BTG2	7832	qRT-PCR	25626081
mirtarbase	hsa-miR-27b-3p	BTG2	7832	PAR-CLIP	24398324
mirtarbase	hsa-miR-7-5p	BTG2	7832	Sequencing	20371350
mirtarbase	hsa-miR-7-5p	BTLA	151888	PAR-CLIP	20371350
mirtarbase	hsa-miR-7-5p	BTLA	151888	PAR-CLIP	21572407
mirtarbase	hsa-miR-7-5p	BTLA	151888	PAR-CLIP	22012620
mirtarbase	hsa-miR-7-5p	BTLA	151888	PAR-CLIP	23446348
mirtarbase	hsa-miR-21-5p	BTN3A3	10384	HITS-CLIP	22473208
mirtarbase	hsa-miR-22-3p	BTN3A3	10384	PAR-CLIP	20371350
mirtarbase	hsa-miR-223-5p	BTN3A3	10384	PAR-CLIP	20371350
mirtarbase	hsa-miR-26b-5p	BTN3A3	10384	Microarray	19088304
mirtarbase	hsa-miR-22-3p	BUB1B	701	CLASH	23622248
mirtarbase	hsa-miR-27a-3p	BUB3	9184	PAR-CLIP	23592263
mirtarbase	hsa-miR-27b-3p	BUB3	9184	PAR-CLIP	23592263
mirtarbase	hsa-miR-26b-5p	BUD31	8896	Microarray	19088304
mirtarbase	hsa-miR-223-5p	BVES	11149	HITS-CLIP	23706177
mirtarbase	hsa-miR-223-5p	BVES	11149	HITS-CLIP	27418678
mirtarbase	hsa-miR-223-5p	BVES	11149	PAR-CLIP	20371350
mirtarbase	hsa-miR-223-5p	BVES	11149	PAR-CLIP	23446348
mirtarbase	hsa-miR-223-5p	BVES	11149	PAR-CLIP//HITS-CLIP	21572407
mirtarbase	hsa-let-7f-5p	BZW1	9689	PAR-CLIP	20371350
mirtarbase	hsa-let-7f-5p	BZW1	9689	PAR-CLIP	23592263
mirtarbase	hsa-let-7f-5p	BZW1	9689	PAR-CLIP	26701625
mirtarbase	hsa-let-7g-5p	BZW1	9689	PAR-CLIP	20371350
mirtarbase	hsa-let-7g-5p	BZW1	9689	PAR-CLIP	23592263
mirtarbase	hsa-let-7g-5p	BZW1	9689	PAR-CLIP	26701625
mirtarbase	hsa-miR-142-5p	BZW1	9689	PAR-CLIP	23592263
mirtarbase	hsa-miR-7-5p	C10orf105	414152	Microarray	17612493
mirtarbase	hsa-miR-142-3p	C11orf16	56673	Microarray	17612493
mirtarbase	hsa-miR-26b-5p	C11orf16	56673	Microarray	19088304
mirtarbase	hsa-miR-7-5p	C11orf24	53838	Microarray	19073608
mirtarbase	hsa-miR-142-3p	C11orf74	119710	PAR-CLIP	22012620
mirtarbase	hsa-miR-181a-5p	C12orf29	91298	Microarray//qRT-PCR	22815788
mirtarbase	hsa-let-7f-5p	C12orf4	57102	PAR-CLIP	23446348
mirtarbase	hsa-let-7g-5p	C12orf4	57102	PAR-CLIP	23446348
mirtarbase	hsa-miR-223-5p	C12orf60	144608	HITS-CLIP	24906430
mirtarbase	hsa-miR-223-5p	C12orf60	144608	HITS-CLIP	27418678
mirtarbase	hsa-miR-22-3p	C15orf40	123207	PAR-CLIP	23446348
mirtarbase	hsa-miR-22-3p	C15orf40	123207	PAR-CLIP	27292025
mirtarbase	hsa-miR-221-3p	C15orf40	123207	CLASH	23622248
mirtarbase	hsa-miR-142-5p	C15orf41	84529	HITS-CLIP	23824327
mirtarbase	hsa-miR-223-5p	C15orf41	84529	HITS-CLIP	23313552
mirtarbase	hsa-miR-223-5p	C15orf41	84529	HITS-CLIP	23824327
mirtarbase	hsa-miR-203a-3p	C15orf48	84419	PAR-CLIP	21572407
mirtarbase	hsa-miR-142-3p	C16orf70	80262	PAR-CLIP	20371350
mirtarbase	hsa-miR-142-3p	C16orf70	80262	PAR-CLIP	21572407
mirtarbase	hsa-miR-26a-5p	C16orf70	80262	HITS-CLIP	22473208
mirtarbase	hsa-miR-26a-5p	C16orf70	80262	PAR-CLIP	20371350
mirtarbase	hsa-miR-26a-5p	C16orf70	80262	PAR-CLIP	21572407
mirtarbase	hsa-miR-26b-5p	C16orf70	80262	HITS-CLIP	22473208
mirtarbase	hsa-miR-26b-5p	C16orf70	80262	PAR-CLIP	20371350
mirtarbase	hsa-miR-26b-5p	C16orf70	80262	PAR-CLIP	21572407
mirtarbase	hsa-miR-26a-5p	C17orf51	339263	CLASH	23622248
mirtarbase	hsa-miR-7-5p	C17orf78	284099	Microarray	17612493
mirtarbase	hsa-miR-142-3p	C18orf25	147339	Microarray//qRT-PCR	22815788
mirtarbase	hsa-miR-26b-5p	C18orf25	147339	Sequencing	20371350
mirtarbase	hsa-miR-221-3p	C19orf12	83636	PAR-CLIP	21572407
mirtarbase	hsa-miR-7-5p	C19orf12	83636	Sequencing	20371350
mirtarbase	hsa-let-7f-5p	C19orf47	126526	PAR-CLIP	20371350
mirtarbase	hsa-let-7f-5p	C19orf47	126526	PAR-CLIP	21572407
mirtarbase	hsa-let-7g-5p	C19orf47	126526	PAR-CLIP	20371350
mirtarbase	hsa-let-7g-5p	C19orf47	126526	PAR-CLIP	21572407
mirtarbase	hsa-let-7f-5p	C19orf53	28974	PAR-CLIP	23592263
mirtarbase	hsa-let-7f-5p	C19orf53	28974	PAR-CLIP	26701625
mirtarbase	hsa-let-7g-5p	C19orf53	28974	PAR-CLIP	23592263
mirtarbase	hsa-let-7g-5p	C19orf53	28974	PAR-CLIP	26701625
mirtarbase	hsa-miR-26b-5p	C1D	10438	Microarray	19088304
mirtarbase	hsa-miR-26b-5p	C1GALT1C1	29071	Microarray	19088304
mirtarbase	hsa-miR-181a-5p	C1orf109	54955	Microarray	17612493
mirtarbase	hsa-miR-21-5p	C1orf147	574431	PAR-CLIP	22012620
mirtarbase	hsa-let-7f-5p	C1orf21	81563	PAR-CLIP	20371350
mirtarbase	hsa-let-7g-5p	C1orf21	81563	PAR-CLIP	20371350
mirtarbase	hsa-miR-7-5p	C1orf21	81563	Microarray	17612493
mirtarbase	hsa-let-7f-5p	C1orf210	149466	HITS-CLIP	23706177
mirtarbase	hsa-let-7f-5p	C1orf210	149466	PAR-CLIP	21572407
mirtarbase	hsa-let-7f-5p	C1orf210	149466	PAR-CLIP	23446348
mirtarbase	hsa-let-7g-5p	C1orf210	149466	HITS-CLIP	23706177
mirtarbase	hsa-let-7g-5p	C1orf210	149466	PAR-CLIP	21572407
mirtarbase	hsa-let-7g-5p	C1orf210	149466	PAR-CLIP	23446348
mirtarbase	hsa-miR-26b-5p	C1orf216	127703	Microarray	19088304
mirtarbase	hsa-miR-143-3p	C1orf50	79078	HITS-CLIP	23824327
mirtarbase	hsa-miR-26a-5p	C1orf50	79078	HITS-CLIP	23824327
mirtarbase	hsa-miR-26b-5p	C1orf50	79078	HITS-CLIP	23824327
mirtarbase	hsa-miR-143-3p	C1orf61	10485	PAR-CLIP	22100165
mirtarbase	hsa-miR-27b-3p	C1orf74	148304	CLASH	23622248
mirtarbase	hsa-miR-22-3p	C1orf87	127795	HITS-CLIP	23824327
mirtarbase	hsa-miR-26b-5p	C1QB	713	Microarray	19088304
mirtarbase	hsa-miR-26b-5p	C1QTNF1	114897	Microarray	19088304
mirtarbase	hsa-miR-181a-5p	C1QTNF9	338872	Microarray	17612493
mirtarbase	hsa-let-7f-5p	C1RL	51279	PAR-CLIP	23592263
mirtarbase	hsa-let-7g-5p	C1RL	51279	PAR-CLIP	23592263
mirtarbase	hsa-miR-142-3p	C2	717	Microarray	17612493
mirtarbase	hsa-miR-21-5p	C20orf194	25943	Microarray	18591254
mirtarbase	hsa-miR-27a-3p	C2CD2L	9854	HITS-CLIP	22473208
mirtarbase	hsa-miR-27b-3p	C2CD2L	9854	HITS-CLIP	22473208
mirtarbase	hsa-miR-143-3p	C2orf15	150590	HITS-CLIP	23824327
mirtarbase	hsa-miR-181a-5p	C2orf69	205327	HITS-CLIP	22473208
mirtarbase	hsa-miR-26a-5p	C3	718	PAR-CLIP	27292025
mirtarbase	hsa-miR-26b-5p	C3	718	Microarray	19088304
mirtarbase	hsa-miR-26b-5p	C3	718	PAR-CLIP	27292025
mirtarbase	hsa-miR-223-5p	C3orf35	339883	HITS-CLIP	27418678
mirtarbase	hsa-miR-7-5p	C3orf38	285237	CLASH	23622248
mirtarbase	hsa-miR-142-3p	C4BPB	725	Microarray	17612493
mirtarbase	hsa-miR-26b-5p	C5AR1	728	Microarray	19088304
mirtarbase	hsa-miR-7-5p	C5orf22	55322	Microarray	17612493
mirtarbase	hsa-miR-142-3p	C5orf24	134553	Microarray	17612493
mirtarbase	hsa-miR-22-3p	C5orf24	134553	PAR-CLIP	21572407
mirtarbase	hsa-miR-22-3p	C5orf24	134553	PAR-CLIP	23446348
mirtarbase	hsa-miR-22-3p	C5orf24	134553	PAR-CLIP	23592263
mirtarbase	hsa-miR-22-3p	C5orf24	134553	PAR-CLIP	24398324
mirtarbase	hsa-miR-22-3p	C5orf24	134553	Sequencing	20371350
mirtarbase	hsa-let-7f-5p	C5orf51	285636	PAR-CLIP	20371350
mirtarbase	hsa-let-7f-5p	C5orf51	285636	PAR-CLIP	21572407
mirtarbase	hsa-let-7f-5p	C5orf51	285636	PAR-CLIP	23446348
mirtarbase	hsa-let-7f-5p	C5orf51	285636	PAR-CLIP	23592263
mirtarbase	hsa-let-7f-5p	C5orf51	285636	PAR-CLIP	24398324
mirtarbase	hsa-let-7f-5p	C5orf51	285636	PAR-CLIP	26701625
mirtarbase	hsa-let-7f-5p	C5orf51	285636	PAR-CLIP	27292025
mirtarbase	hsa-let-7g-5p	C5orf51	285636	PAR-CLIP	20371350
mirtarbase	hsa-let-7g-5p	C5orf51	285636	PAR-CLIP	21572407
mirtarbase	hsa-let-7g-5p	C5orf51	285636	PAR-CLIP	23446348
mirtarbase	hsa-let-7g-5p	C5orf51	285636	PAR-CLIP	23592263
mirtarbase	hsa-let-7g-5p	C5orf51	285636	PAR-CLIP	24398324
mirtarbase	hsa-let-7g-5p	C5orf51	285636	PAR-CLIP	26701625
mirtarbase	hsa-let-7g-5p	C5orf51	285636	PAR-CLIP	27292025
mirtarbase	hsa-miR-221-3p	C5orf51	285636	PAR-CLIP	23592263
mirtarbase	hsa-miR-27a-3p	C5orf51	285636	PAR-CLIP	23592263
mirtarbase	hsa-miR-27b-3p	C5orf51	285636	PAR-CLIP	23592263
mirtarbase	hsa-miR-27a-3p	C6orf120	387263	PAR-CLIP	24398324
mirtarbase	hsa-miR-27a-3p	C6orf120	387263	Sequencing	20371350
mirtarbase	hsa-miR-27b-3p	C6orf120	387263	PAR-CLIP	24398324
mirtarbase	hsa-miR-26b-5p	C6orf15	29113	Microarray	19088304
mirtarbase	hsa-miR-203a-3p	C6orf223	221416	PAR-CLIP	22291592
mirtarbase	hsa-miR-26a-5p	C6orf47	57827	CLASH	23622248
mirtarbase	hsa-miR-142-3p	C7orf31	136895	Microarray	17612493
mirtarbase	hsa-miR-181a-5p	C8A	731	Microarray	17612493
mirtarbase	hsa-miR-21-5p	C8orf17	100507249	HITS-CLIP	23313552
mirtarbase	hsa-miR-26b-5p	C8orf33	65265	Microarray	19088304
mirtarbase	hsa-miR-7-5p	C8orf37	157657	PAR-CLIP	20371350
mirtarbase	hsa-miR-30e-5p	C8orf76	84933	HITS-CLIP	22473208
mirtarbase	hsa-miR-26b-5p	C9orf16	79095	Microarray	19088304
mirtarbase	hsa-miR-142-3p	C9orf72	203228	HITS-CLIP	22473208
mirtarbase	hsa-miR-142-3p	C9orf72	203228	Microarray	17612493
mirtarbase	hsa-miR-26b-5p	CA1	759	Microarray	19088304
mirtarbase	hsa-miR-26b-5p	CA11	770	Microarray	19088304
mirtarbase	hsa-miR-26a-5p	CA2	760	CLASH	23622248
mirtarbase	hsa-miR-26b-5p	CA2	760	Microarray	19088304
mirtarbase	hsa-miR-26b-5p	CA2	760	Sequencing	20371350
mirtarbase	hsa-miR-142-3p	CA5B	11238	Microarray	17612493
mirtarbase	hsa-miR-26b-5p	CA9	768	Microarray	19088304
mirtarbase	hsa-miR-26b-5p	CAAP1	79886	Microarray	19088304
mirtarbase	hsa-miR-27a-3p	CAB39	51719	HITS-CLIP	22473208
mirtarbase	hsa-miR-27b-3p	CAB39	51719	HITS-CLIP	22473208
mirtarbase	hsa-miR-26b-5p	CAB39L	81617	Microarray	19088304
mirtarbase	hsa-miR-27a-3p	CAB39L	81617	Microarray//qRT-PCR	22815788
mirtarbase	hsa-miR-27b-3p	CAB39L	81617	Microarray//qRT-PCR	22815788
mirtarbase	hsa-miR-223-5p	CABP4	57010	HITS-CLIP	27418678
mirtarbase	hsa-miR-223-5p	CABP4	57010	PAR-CLIP	23446348
mirtarbase	hsa-miR-221-3p	CABYR	26256	CLASH	23622248
mirtarbase	hsa-miR-26b-5p	CACNA1S	779	Microarray	19088304
mirtarbase	hsa-miR-26b-5p	CACNB2	783	Microarray	19088304
mirtarbase	hsa-miR-26b-5p	CACNB4	785	Sequencing	20371350
mirtarbase	hsa-miR-26b-5p	CACNG3	10368	Microarray	19088304
mirtarbase	hsa-miR-7-5p	CACNG5	27091	Microarray	17612493
mirtarbase	hsa-miR-7-5p	CACNG7	59284	PAR-CLIP	20371350
mirtarbase	hsa-miR-26b-5p	CAD	790	Microarray	19088304
mirtarbase	hsa-miR-21-5p	CADM1	23705	Luciferase reporter assay	27055844
mirtarbase	hsa-miR-26b-5p	CADM1	23705	Microarray	19088304
mirtarbase	hsa-miR-203a-3p	CADM2	253559	HITS-CLIP	23824327
mirtarbase	hsa-miR-181a-5p	CADPS2	93664	PAR-CLIP	27292025
mirtarbase	hsa-miR-7-5p	CAGE1	285782	Microarray	17612493
mirtarbase	hsa-miR-142-3p	CALCOCO2	10241	Microarray	17612493
mirtarbase	hsa-miR-21-5p	CALD1	800	Microarray	18591254
mirtarbase	hsa-miR-223-5p	CALHM5	254228	PAR-CLIP	21572407
mirtarbase	hsa-let-7f-5p	CALM1	801	Microarray	22942087
mirtarbase	hsa-miR-142-3p	CALM1	801	HITS-CLIP	22473208
mirtarbase	hsa-miR-142-5p	CALM1	801	PAR-CLIP	20371350
mirtarbase	hsa-miR-142-5p	CALM1	801	PAR-CLIP	21572407
mirtarbase	hsa-miR-142-5p	CALM1	801	PAR-CLIP	23446348
mirtarbase	hsa-miR-1290	CALM2	805	PAR-CLIP	23592263
mirtarbase	hsa-miR-143-3p	CALM3	808	PAR-CLIP	23446348
mirtarbase	hsa-miR-143-3p	CALM3	808	PAR-CLIP	26701625
mirtarbase	hsa-miR-27b-3p	CALM3	808	CLASH	23622248
mirtarbase	hsa-miR-7-5p	CALM3	808	Microarray	19073608
mirtarbase	hsa-miR-7-5p	CALM3	808	PAR-CLIP	20371350
mirtarbase	hsa-miR-7-5p	CALM3	808	PAR-CLIP	21572407
mirtarbase	hsa-miR-7-5p	CALM3	808	PAR-CLIP	23446348
mirtarbase	hsa-miR-7-5p	CALM3	808	PAR-CLIP	23592263
mirtarbase	hsa-miR-7-5p	CALM3	808	PAR-CLIP	24398324
mirtarbase	hsa-miR-7-5p	CALM3	808	PAR-CLIP	26701625
mirtarbase	hsa-miR-223-5p	CALML4	91860	PAR-CLIP	23446348
mirtarbase	hsa-miR-223-5p	CALML4	91860	PAR-CLIP//HITS-CLIP	21572407
mirtarbase	hsa-miR-203a-3p	CALR	811	PAR-CLIP	23592263
mirtarbase	hsa-let-7f-5p	CALU	813	PAR-CLIP	20371350
mirtarbase	hsa-let-7g-5p	CALU	813	PAR-CLIP	20371350
mirtarbase	hsa-miR-7-5p	CALU	813	Microarray	17612493
mirtarbase	hsa-miR-7-5p	CAMK2D	817	Microarray	19073608
mirtarbase	hsa-miR-22-3p	CAMK2N1	55450	HITS-CLIP	23313552
mirtarbase	hsa-miR-26b-5p	CAMK4	814	Microarray	19088304
mirtarbase	hsa-miR-221-3p	CAMKK1	84254	Microarray	22942087
mirtarbase	hsa-miR-26b-5p	CAMKMT	79823	Microarray	19088304
mirtarbase	hsa-miR-26a-5p	CAMKV	79012	CLASH	23622248
mirtarbase	hsa-miR-203a-3p	CAND1	55832	PAR-CLIP	23592263
mirtarbase	hsa-miR-30e-5p	CAND1	55832	PAR-CLIP	24398324
mirtarbase	hsa-miR-7-5p	CANT1	124583	Microarray	19073608
mirtarbase	hsa-miR-30e-5p	CANX	821	CLASH	23622248
mirtarbase	hsa-miR-7-5p	CANX	821	PAR-CLIP	20371350
mirtarbase	hsa-miR-7-5p	CANX	821	PAR-CLIP	23592263
mirtarbase	hsa-miR-7-5p	CANX	821	PAR-CLIP	24398324
mirtarbase	hsa-miR-142-5p	CAPN15	6650	PAR-CLIP	23592263
mirtarbase	hsa-miR-27a-3p	CAPN15	6650	PAR-CLIP	26701625
mirtarbase	hsa-miR-27b-3p	CAPN15	6650	PAR-CLIP	26701625
mirtarbase	hsa-miR-7-5p	CAPN15	6650	Microarray	19073608
mirtarbase	hsa-miR-7-5p	CAPN2	824	Sequencing	20371350
mirtarbase	hsa-miR-26b-5p	CAPN9	10753	Microarray	19088304
mirtarbase	hsa-miR-21-5p	CAPRIN1	4076	Microarray	18591254
mirtarbase	hsa-let-7f-5p	CAPRIN2	65981	CLASH	23622248
mirtarbase	hsa-miR-142-5p	CAPRIN2	65981	PAR-CLIP	21572407
mirtarbase	hsa-miR-142-5p	CAPRIN2	65981	PAR-CLIP	22012620
mirtarbase	hsa-miR-181a-5p	CAPRIN2	65981	PAR-CLIP	20371350
mirtarbase	hsa-miR-181a-5p	CAPRIN2	65981	PAR-CLIP	23592263
mirtarbase	hsa-miR-1290	CAPZA1	829	PAR-CLIP	27292025
mirtarbase	hsa-miR-142-5p	CAPZA1	829	PAR-CLIP	20371350
mirtarbase	hsa-miR-142-5p	CAPZA1	829	PAR-CLIP	21572407
mirtarbase	hsa-miR-142-5p	CAPZA1	829	PAR-CLIP	23446348
mirtarbase	hsa-miR-142-5p	CAPZA1	829	PAR-CLIP	24398324
mirtarbase	hsa-miR-26a-5p	CAPZA1	829	PAR-CLIP	27292025
mirtarbase	hsa-miR-26b-5p	CAPZA1	829	PAR-CLIP	27292025
mirtarbase	hsa-miR-7-5p	CAPZA1	829	Microarray	17612493
mirtarbase	hsa-miR-7-5p	CAPZA1	829	Microarray//Microarray;Other	19073608
mirtarbase	hsa-miR-7-5p	CAPZB	832	PAR-CLIP	23592263
mirtarbase	hsa-miR-26b-5p	CARD14	79092	Microarray	19088304
mirtarbase	hsa-miR-181a-5p	CARM1	10498	HITS-CLIP	22473208
mirtarbase	hsa-miR-27a-3p	CARM1	10498	HITS-CLIP	22473208
mirtarbase	hsa-miR-27b-3p	CARM1	10498	HITS-CLIP	22473208
mirtarbase	hsa-miR-26b-5p	CARS2	79587	Microarray	19088304
mirtarbase	hsa-miR-21-5p	CASC2	255082	qRT-PCR//Luciferase reporter assay//Immunoprecipitaion//Western blot	25446261
mirtarbase	hsa-miR-26b-5p	CASD1	64921	Microarray	19088304
mirtarbase	hsa-miR-203a-3p	CASK	8573	Luciferase reporter assay//qRT-PCR//Western blot	25373785
mirtarbase	hsa-miR-7-5p	CASP16P	197350	PAR-CLIP	20371350
mirtarbase	hsa-miR-7-5p	CASP16P	197350	PAR-CLIP	22012620
mirtarbase	hsa-let-7g-5p	CASP3	836	Immunoblot//Luciferase reporter assay//qRT-PCR	24252910
mirtarbase	hsa-miR-221-3p	CASP3	836	Sequencing	20371350
mirtarbase	hsa-miR-26b-5p	CASP3	836	Microarray	19088304
mirtarbase	hsa-miR-30e-5p	CASP3	836	HITS-CLIP	22473208
mirtarbase	hsa-miR-30e-5p	CASP3	836	Luciferase reporter assay	26895377
mirtarbase	hsa-miR-26b-5p	CASP4	837	Microarray	19088304
mirtarbase	hsa-miR-143-3p	CASP5	838	PAR-CLIP	22100165
mirtarbase	hsa-miR-26b-5p	CASP7	840	Microarray	19088304
mirtarbase	hsa-miR-21-5p	CASP8	841	In situ hybridization//Luciferase reporter assay//Northern blot//qRT-PCR//Western blot	26080425
mirtarbase	hsa-miR-26b-5p	CASP8	841	Microarray	19088304
mirtarbase	hsa-miR-26b-5p	CASP9	842	Microarray	19088304
mirtarbase	hsa-miR-7-5p	CASP9	842	Microarray	19073608
mirtarbase	hsa-miR-26b-5p	CASQ1	844	Microarray	19088304
mirtarbase	hsa-let-7f-5p	CASTOR2	729438	PAR-CLIP	26701625
mirtarbase	hsa-let-7g-5p	CASTOR2	729438	PAR-CLIP	26701625
mirtarbase	hsa-miR-26b-5p	CATSPERB	79820	Microarray	19088304
mirtarbase	hsa-miR-203a-3p	CAV1	857	Immunoblot//Luciferase reporter assay//qRT-PCR	22421148
mirtarbase	hsa-miR-26b-5p	CAV1	857	Microarray	19088304
mirtarbase	hsa-miR-7-5p	CAV1	857	Microarray	19073608
mirtarbase	hsa-miR-7-5p	CAV1	857	PAR-CLIP	20371350
[truncated: 9,814 more rows]

## Sheet: D_Supporting_evidence
miRNA	Target	Support
[truncated: 8,302 more rows]

[truncated: 1 more sheets: E_Enriched_terms]
